# Supplementary material for: Transcriptome sequencing of Hodgkin lymphoma Hodgkin and Reed-Sternberg cells reveals escape from NK cell recognition and an unfolded protein response
Source: Research Square preprint supplement (doi:10.21203/rs.3.rs-7957952/v1), 2025-11-13
Supplement: Supplementary file 1 [file d7912fb1f984dfa5fda500de.xlsx]

## Sheet: Summary of tables
List of Supplementary Tables
**All tables are located within this file, as separate tabs.***
Datatable S1: Analysis of differential gene expression in HRS cells vs intratumoral B cells
Datatable S2: Raw count files for RNAseq data
Datatable S3: cHL signature defining genes
Datatable S5: Analysis of viral transcripts
Datatable S6: HRS vs B DEGs and PMBL expression from Mottok et al
**These tables are located within this file, as separate tabs. Tables S1 and S2 are in the supplemental data file***

## Sheet: DEGs_HRS_vs_B
Datatable S1: Analysis of differential gene expression in HRS cells vs intratumoral B cells
	logFC	AveExpr	t	P.Value	adj.P.Val	B
LY86-AS1	-8.62408	-2.00981	-23.0991	5.23754e-25	8.78388e-21	42.5685
MIR5195	-9.06915	-1.86145	-21.9459	3.61851e-24	3.0343e-20	41.3885
LOC105369723	-10.5135	-0.636836	-21.4658	8.30003e-24	4.63999e-20	41.3428
LINC01800	-8.79013	-2.15582	-21.0353	1.77096e-23	6.965e-20	39.9447
CRIP3	-9.85574	-0.927073	-20.9458	2.0765e-23	6.965e-20	40.4496
FAM159A	-8.62508	-0.787239	-20.7286	3.063e-23	8.56161e-20	39.9376
ZNF677	-8.1096	-1.76794	-20.0632	1.02936e-22	2.4662e-19	38.5284
ENOX1	10.0062	-0.258321	19.6289	2.31176e-22	4.53041e-19	38.2682
CD1A	-10.3351	-0.912222	-19.6022	2.4312e-22	4.53041e-19	38.5181
SNX29P1	-8.86635	-0.391734	-19.4357	3.32913e-22	5.58329e-19	38.0609
LOC400958	-8.19696	-2.22686	-18.8613	1.0017e-21	1.52723e-18	36.5124
GSAP	-8.83024	2.25274	-18.7942	1.14146e-21	1.54996e-18	37.2468
BLNK	-8.02137	4.61467	-18.7679	1.20145e-21	1.54996e-18	38.1488
C1orf162	-6.54155	4.49881	-18.4042	2.45407e-21	2.93981e-18	37.5533
LCN10	-9.55589	0.295472	-17.9429	6.17308e-21	6.90192e-18	35.7719
HLA-DMB	-4.2058	7.48128	-17.835	7.67939e-21	8.04945e-18	37.3902
LINC01013	-8.95533	-1.93715	-17.6424	1.13699e-20	1.12167e-17	34.9111
ZNF528-AS1	-7.92099	-1.41479	-17.5828	1.28472e-20	1.197e-17	34.6354
MIR4432HG	-7.89657	-2.22216	-17.5428	1.3947e-20	1.23108e-17	34.3912
HLA-DMA	-3.35431	8.39824	-17.389	1.915e-20	1.60583e-17	36.4758
CD180	-10.6315	1.11937	-17.2994	2.30603e-20	1.84164e-17	34.7089
FCRL2	-10.563	1.59946	-17.19	2.8957e-20	2.20744e-17	34.5106
C1orf220	-8.53655	-0.958807	-17.0023	4.29244e-20	3.12994e-17	33.8604
CPNE4	10.5795	0.226466	16.9666	4.62695e-20	3.23327e-17	33.9675
PKM	2.48626	10.2725	16.8314	6.15822e-20	4.13118e-17	35.2585
ZNF502	-8.35022	-1.39164	-16.7132	7.91979e-20	5.02153e-17	33.2454
MYO1B	-8.27333	-1.82978	-16.7035	8.08428e-20	5.02153e-17	33.0551
GNG7	-7.44724	2.14968	-16.6753	8.58544e-20	5.11496e-17	33.7208
CNR2	-9.87739	1.07774	-16.6614	8.84467e-20	5.11496e-17	33.5114
CD1D	-8.72274	-0.268727	-16.539	1.1499e-19	6.42833e-17	33.1709
DPPA4	-7.96503	-2.52531	-16.5177	1.20373e-19	6.51216e-17	32.5327
OSBPL10	-8.95246	0.0845233	-16.4881	1.28304e-19	6.72433e-17	33.1009
LAPTM5	-5.01152	7.66909	-16.1471	2.68997e-19	1.36707e-16	33.8613
ZFP36L2	-3.66216	7.02371	-16.0172	3.57684e-19	1.76433e-16	33.5764
STRBP	-3.24014	6.52543	-15.9242	4.39167e-19	2.10436e-16	33.3679
NT5E	-9.43161	-0.202349	-15.8768	4.87714e-19	2.27207e-16	31.9633
ZNF860	-8.59516	-1.44191	-15.8324	5.38161e-19	2.43933e-16	31.6592
SEL1L3	-7.06122	3.60801	-15.791	5.90054e-19	2.60416e-16	32.3259
PCNA	3.22728	7.12842	15.7343	6.69412e-19	2.87864e-16	32.9533
TTC39A	9.92979	2.84541	15.7142	7.00027e-19	2.93504e-16	31.6076
MEGF6	-9.11966	-0.849104	-15.6405	8.25577e-19	3.37701e-16	31.3121
CD52	-6.40798	6.79886	-15.6178	8.68574e-19	3.4683e-16	32.6959
SCN4A	-7.23209	-2.41276	-15.5066	1.11526e-18	4.27193e-16	30.5219
ZNF395	-5.27861	4.35988	-15.5044	1.12077e-18	4.27193e-16	31.9255
STAP1	-8.99718	3.16632	-15.4881	1.16266e-18	4.3331e-16	31.4196
SP100	-2.573	8.07357	-15.4054	1.40162e-18	5.0522e-16	32.188
MBD4	-2.15577	7.06797	-15.4009	1.41586e-18	5.0522e-16	32.2081
VAV3-AS1	-8.59875	-0.702183	-15.3864	1.46309e-18	5.07765e-16	30.8903
TBC1D9	-8.81946	0.306679	-15.3794	1.48668e-18	5.07765e-16	30.9445
HLA-DOB	-5.33593	5.40188	-15.3614	1.54866e-18	5.07765e-16	32.0087
DPEP2	-8.62463	0.416513	-15.3606	1.55141e-18	5.07765e-16	30.9145
GH1	-6.82797	-2.92668	-15.3541	1.57437e-18	5.07765e-16	30.0729
ZNF469	-6.09681	-3.47439	-15.2786	1.86932e-18	5.91517e-16	29.666
PXK	-3.89225	5.41428	-15.1362	2.58819e-18	7.99205e-16	31.5158
ABCB4	-9.42343	0.727163	-15.1307	2.62097e-18	7.99205e-16	30.5042
FAM30A	-8.49041	1.71492	-15.1041	2.78592e-18	8.23037e-16	30.5079
LOC100507616	-9.67525	1.54061	-15.1023	2.79728e-18	8.23037e-16	30.4667
ZNF667-AS1	-8.68446	-0.815041	-15.0708	3.00724e-18	8.69558e-16	30.2529
ARNTL2	8.17589	2.75407	15.0418	3.21496e-18	9.13867e-16	30.2105
QRSL1	-2.90481	6.40878	-14.99	3.62277e-18	1.01262e-15	31.2814
POU2F2	-6.19939	5.05933	-14.9678	3.8134e-18	1.04843e-15	30.9902
LY86	-8.6974	2.89183	-14.9347	4.11584e-18	1.11333e-15	30.3096
LINC00461	8.6436	-1.01838	14.9157	4.30132e-18	1.14504e-15	29.5913
LINC01781	-9.16584	-0.382002	-14.7892	5.77031e-18	1.51209e-15	29.7728
NCR3	-7.76852	1.01033	-14.7758	5.95453e-18	1.53636e-15	29.7128
FCRL1	-9.77104	3.08044	-14.7616	6.15404e-18	1.56378e-15	29.8912
CARNS1	-7.48688	-1.67997	-14.6839	7.37936e-18	1.84715e-15	29.0447
KRT7	9.25153	1.96206	14.6677	7.66518e-18	1.89048e-15	29.4499
FAM129C	-9.01795	2.04915	-14.6175	8.62374e-18	2.09607e-15	29.5102
CAMKK1	-7.1221	-1.45653	-14.5804	9.41002e-18	2.25451e-15	28.7233
KLK1	-7.63967	-2.14585	-14.5388	1.03774e-17	2.45126e-15	28.7672
ZNF418	-8.23872	-1.17071	-14.5305	1.0584e-17	2.46533e-15	29.0432
LMO2	-9.33527	-0.672436	-14.5127	1.1036e-17	2.53541e-15	29.1647
PADI4	-6.93952	-1.94313	-14.4653	1.23456e-17	2.79794e-15	28.5027
HLA-DPB1	-3.35999	8.86317	-14.4403	1.30973e-17	2.92872e-15	29.9125
KHDRBS2	-8.52124	-0.953645	-14.3595	1.58648e-17	3.49257e-15	28.73
HVCN1	-8.04399	3.65476	-14.3551	1.60353e-17	3.49257e-15	29.244
IFITM2	-5.41939	5.99476	-14.3204	1.74129e-17	3.7189e-15	29.6758
ELL3	-5.54835	5.16255	-14.3179	1.75179e-17	3.7189e-15	29.5918
GAPT	-9.80326	1.59318	-14.2896	1.87407e-17	3.92876e-15	28.7694
CD79B	-7.95167	5.33874	-14.2844	1.89763e-17	3.92904e-15	29.4873
VAV3	-7.93669	1.47857	-14.259	2.01626e-17	4.12374e-15	28.6554
STRIP2	8.69289	0.689171	14.214	2.24519e-17	4.48374e-15	28.3977
MACROD2	-9.05543	-0.113315	-14.2139	2.24575e-17	4.48374e-15	28.5245
CCNB1	4.21663	6.47422	14.2088	2.27306e-17	4.48489e-15	29.4255
ARRDC5	-7.76353	-1.47161	-14.1722	2.48189e-17	4.83997e-15	28.1701
SRGN	4.20267	8.5387	14.1596	2.558e-17	4.93106e-15	29.3065
HSF5	-7.03648	-1.81629	-14.1358	2.70867e-17	5.16217e-15	27.855
LINC01684	-8.04405	-0.340373	-14.1115	2.87098e-17	5.41002e-15	28.1719
HRK	-6.39213	-2.77308	-14.1029	2.93136e-17	5.46242e-15	27.4763
SELL	-6.42531	7.24626	-14.0413	3.40031e-17	6.20247e-15	29.0635
MS4A7	-8.37963	0.656439	-14.0376	3.43105e-17	6.20247e-15	28.1624
PAX9	8.10438	-1.49604	14.0366	3.43945e-17	6.20247e-15	27.6426
FAM177B	-9.66915	0.626347	-14.025	3.53683e-17	6.31024e-15	28.1835
MIR223	-5.9652	-3.31027	-14.0111	3.65821e-17	6.4581e-15	27.2349
SNX29	-3.60187	6.17564	-13.9959	3.79449e-17	6.61547e-15	28.9541
RALGPS2	-8.12113	3.77869	-13.9925	3.82625e-17	6.61547e-15	28.3953
GNB5	-2.89578	5.06217	-13.9784	3.95873e-17	6.77469e-15	28.8389
MAGI1	8.55017	0.859828	13.9662	4.07773e-17	6.89768e-15	27.8715
SMIM14	-4.65895	6.0732	-13.9627	4.11286e-17	6.89768e-15	28.8684
UGT8	-8.64795	0.236466	-13.9387	4.35847e-17	7.16919e-15	27.9375
CD1C	-10.1808	0.976196	-13.9386	4.36025e-17	7.16919e-15	28.0076
SNX29P2	-6.62474	2.10596	-13.9173	4.59116e-17	7.47556e-15	27.992
ARHGAP10	8.36259	0.776562	13.9027	4.75743e-17	7.67181e-15	27.6978
SCIMP	-8.32172	1.71739	-13.866	5.20054e-17	8.3065e-15	27.8394
HLA-DOA	-3.9561	6.4718	-13.812	5.93324e-17	9.38739e-15	28.5101
2003-03-01	-3.76571	3.78429	-13.7532	6.84869e-17	1.07345e-14	28.0735
SIPA1L3	-5.30368	3.00821	-13.7424	7.03204e-17	1.09199e-14	27.7593
ADAM28	-7.83285	4.44713	-13.7133	7.55269e-17	1.15223e-14	27.96
DTX4	-7.71094	-0.32728	-13.713	7.5574e-17	1.15223e-14	27.3117
CD80	4.84596	5.04521	13.6515	8.79055e-17	1.3193e-14	27.9357
EML1	9.9324	0.729499	13.6483	8.85861e-17	1.3193e-14	27.2779
WNT16	-7.46814	-1.16552	-13.6469	8.88922e-17	1.3193e-14	27.0247
CLEC17A	-8.31167	0.713174	-13.6284	9.30502e-17	1.3689e-14	27.2498
LOC105369747	-8.88851	-1.14198	-13.5378	1.16353e-16	1.69683e-14	26.965
ZNF790-AS1	-7.6561	-1.26212	-13.5253	1.19986e-16	1.73473e-14	26.7658
CD37	-3.04765	7.47524	-13.5052	1.2613e-16	1.80797e-14	27.7052
BANK1	-8.74932	4.99569	-13.4838	1.32988e-16	1.89012e-14	27.4864
MIR4420	-5.93225	-3.50938	-13.4576	1.41918e-16	2.00009e-14	26.0315
HTR3A	-8.03826	-2.05191	-13.4489	1.45011e-16	2.02666e-14	26.5341
PRAMENP	-7.65703	-1.09159	-13.4339	1.50519e-16	2.07274e-14	26.6224
MS4A1	-9.16972	6.87424	-13.4332	1.50792e-16	2.07274e-14	27.5835
MDS2	-7.1305	-2.26363	-13.4299	1.52016e-16	2.07274e-14	26.3416
VDAC1	2.13993	7.92802	13.4227	1.54753e-16	2.0781e-14	27.51
C11orf21	-8.62676	-1.37582	-13.4224	1.54888e-16	2.0781e-14	26.5937
H2AFZ	3.25008	9.81613	13.3642	1.79032e-16	2.38003e-14	27.259
PLCG2	-7.53764	3.74942	-13.361	1.80485e-16	2.38003e-14	26.9673
SYK	-8.37199	3.24655	-13.3584	1.81649e-16	2.38003e-14	26.943
ZBP1	-8.49833	0.608945	-13.3006	2.09841e-16	2.72809e-14	26.5134
LOC100505622	-7.44901	-0.522937	-13.2953	2.12672e-16	2.72939e-14	26.3561
VPREB3	-8.34296	3.01868	-13.2934	2.13658e-16	2.72939e-14	26.7418
TMEM154	-6.49949	3.74933	-13.2912	2.14823e-16	2.72939e-14	26.9451
TNFRSF13C	-8.19919	-0.239113	-13.2762	2.23057e-16	2.81269e-14	26.3777
IL24	-7.36702	-2.00974	-13.2712	2.25893e-16	2.8272e-14	26.0609
TUBA1C	3.2692	7.31694	13.2581	2.33419e-16	2.89976e-14	27.1442
ZNF582-AS1	-7.63293	-0.446602	-13.2136	2.60975e-16	3.21824e-14	26.2076
LINC00926	-9.42083	2.54475	-13.1957	2.72948e-16	3.34132e-14	26.3964
TIMP1	6.2537	6.55855	13.1657	2.94384e-16	3.57762e-14	26.8794
KIF4B	6.68128	-1.03075	13.148	3.07749e-16	3.71314e-14	25.6235
TNFRSF17	-8.5231	-0.399883	-13.1435	3.11276e-16	3.72886e-14	26.1256
HMSD	8.98233	1.65094	13.1095	3.39147e-16	4.03393e-14	26.0338
MS4A14	-7.83205	-2.2222	-13.0969	3.50099e-16	4.13487e-14	25.7486
CCNB2	5.11709	5.28307	13.0776	3.67596e-16	4.31116e-14	26.4941
LOC105371899	-6.52936	-2.75419	-13.0456	3.98639e-16	4.64276e-14	25.3193
TPX2	5.96955	4.90328	13.0047	4.4213e-16	5.11376e-14	26.1858
KPNA2	3.00977	8.24478	12.9994	4.48128e-16	5.14764e-14	26.4426
PMEPA1	-8.31758	-0.482765	-12.9919	4.56723e-16	5.21068e-14	25.7401
STX7	-4.00345	6.19378	-12.984	4.65983e-16	5.25376e-14	26.4736
SLC44A2	-5.18836	5.22353	-12.9833	4.66764e-16	5.25376e-14	26.43
RNF207	7.51248	0.499605	12.9597	4.95614e-16	5.5413e-14	25.4793
EVL	-3.12671	4.87371	-12.9342	5.28829e-16	5.87351e-14	26.3399
ZNF578	-6.30893	-2.93617	-12.8357	6.79839e-16	7.50104e-14	24.8244
PSMB8-AS1	-3.36021	5.02378	-12.8308	6.88487e-16	7.5468e-14	26.0621
PRKCB	-6.38616	4.94786	-12.8205	7.0683e-16	7.69756e-14	25.9795
ARSD	-7.28457	-1.75783	-12.7978	7.49102e-16	8.10528e-14	25.0339
FHOD3	6.93663	1.46008	12.7951	7.54437e-16	8.11068e-14	25.2261
AFF3	-8.34979	3.24977	-12.7559	8.34179e-16	8.88182e-14	25.4158
MIR631	-6.60098	-2.6471	-12.7547	8.36758e-16	8.88182e-14	24.6633
EIF4EBP3	-6.12355	-1.96554	-12.7237	9.06024e-16	9.55656e-14	24.6845
SNX22	-5.60257	2.87489	-12.6952	9.74906e-16	1.02188e-13	25.3773
LOC100130298	-7.15088	0.0430657	-12.685	1.00091e-15	1.04207e-13	24.9731
PALD1	-7.47533	-2.14493	-12.6828	1.00659e-15	1.04207e-13	24.6851
PDE2A	-6.27095	-2.06349	-12.6681	1.04559e-15	1.0758e-13	24.5572
CXCR4	-2.99475	8.15265	-12.6426	1.11651e-15	1.14177e-13	25.4862
RTN3	2.64701	5.52732	12.6369	1.13309e-15	1.1517e-13	25.5835
CCL22	8.00729	8.03649	12.5814	1.30802e-15	1.32149e-13	25.3904
FBN1	8.58113	1.6109	12.5745	1.33155e-15	1.33721e-13	24.7784
FOXP1-AS1	-6.25535	-0.613155	-12.5615	1.37723e-15	1.37485e-13	24.5137
THEMIS	9.3642	2.26771	12.5526	1.40923e-15	1.39848e-13	24.7576
RASA3	-7.60199	0.336368	-12.5498	1.41941e-15	1.40029e-13	24.7167
ZNF285	-7.67293	-2.39506	-12.5342	1.47804e-15	1.4496e-13	24.3826
CCR7	3.1034	10.2063	12.4979	1.62426e-15	1.58375e-13	24.9938
TXN	5.13207	8.88892	12.4671	1.75943e-15	1.70563e-13	25.0595
AURKA	5.13249	4.06521	12.4485	1.84701e-15	1.78025e-13	24.7591
PRCD	-6.00549	-3.49878	-12.4361	1.90741e-15	1.82796e-13	23.8113
STAG3	-5.94247	2.99012	-12.4065	2.06073e-15	1.96367e-13	24.6535
ID3	-8.46826	2.33153	-12.3892	2.15603e-15	2.04287e-13	24.4239
FCRL3	-8.94646	2.74249	-12.3773	2.22427e-15	2.09569e-13	24.4832
IGF2BP1	9.03665	1.57257	12.3384	2.46226e-15	2.30696e-13	24.2367
AKAP12	6.84535	2.65258	12.3308	2.51173e-15	2.34024e-13	24.2763
SP110	-2.35108	7.75424	-12.3186	2.59301e-15	2.40262e-13	24.6582
CAPN12	-7.10079	-0.380134	-12.309	2.65952e-15	2.45071e-13	24.0383
GPR18	-5.34541	4.57411	-12.2857	2.82684e-15	2.59066e-13	24.6061
SHTN1	8.24566	-0.188631	12.283	2.84697e-15	2.59492e-13	24.0144
OR52N4	-6.97953	-2.33504	-12.2785	2.88097e-15	2.61172e-13	23.7137
FCRLA	-7.01739	3.98231	-12.2507	3.09906e-15	2.79432e-13	24.4034
TMEM178B	8.46708	0.566079	12.2478	3.12286e-15	2.80072e-13	23.9268
BTG2	-3.86672	5.63431	-12.2439	3.15541e-15	2.81486e-13	24.5836
ZNF528	-7.43136	0.151056	-12.228	3.29035e-15	2.90973e-13	23.9222
TMEM156	-6.27707	3.63792	-12.2273	3.29645e-15	2.90973e-13	24.2646
MYB	7.85511	1.40612	12.2206	3.35453e-15	2.94549e-13	23.8669
PNOC	-7.22727	1.33717	-12.2074	3.47372e-15	3.03426e-13	24.0018
PLEKHF2	-3.45963	5.4091	-12.1997	3.54517e-15	3.08063e-13	24.469
FCRL5	-8.675	2.46862	-12.186	3.67516e-15	3.17712e-13	24.0132
TLR7	-8.19719	0.915515	-12.1757	3.7764e-15	3.2479e-13	23.8617
TGFBR2	-7.02559	3.04267	-12.1687	3.84689e-15	3.29164e-13	24.0287
SPRY1	-6.97662	1.00974	-12.1452	4.09314e-15	3.48457e-13	23.7197
NUF2	3.81975	4.33015	12.1067	4.53178e-15	3.83851e-13	24.0402
CLCF1	-6.83303	-0.149347	-12.1038	4.56646e-15	3.84845e-13	23.5383
JAKMIP1	8.49951	0.793175	12.0975	4.64372e-15	3.89399e-13	23.59
FAM65B	-5.51765	6.42293	-12.0953	4.67068e-15	3.89712e-13	24.1938
IGSF22	-6.40628	-2.43496	-12.092	4.71149e-15	3.9117e-13	23.1744
AANAT	-5.58298	-3.47441	-12.0897	4.74049e-15	3.91639e-13	22.9849
PTPRO	-8.13132	0.415819	-12.0786	4.88213e-15	4.01364e-13	23.6095
ADGRG5	-8.24501	0.119252	-12.0634	5.08259e-15	4.15805e-13	23.5741
TTC9	-8.15093	0.41407	-12.038	5.43802e-15	4.42723e-13	23.5092
LOC283710	-7.15133	-0.639962	-12.0038	5.95597e-15	4.82549e-13	23.3045
SNX2	-2.38955	8.07651	-11.9962	6.0773e-15	4.90011e-13	23.794
HNRNPLL	5.95599	4.18531	11.9489	6.89379e-15	5.51726e-13	23.5205
ARHGDIB	-4.73825	8.15565	-11.9481	6.9085e-15	5.51726e-13	23.6716
PPA1	3.09016	7.98133	11.9346	7.16148e-15	5.69219e-13	23.6735
CD86	3.9892	7.06961	11.9309	7.23301e-15	5.72192e-13	23.7153
BIRC5	5.06518	5.00437	11.9243	7.3616e-15	5.79631e-13	23.5986
BLVRA	4.31229	5.28057	11.917	7.50664e-15	5.88289e-13	23.7155
GUCY2C	-6.50102	-1.31084	-11.9131	7.58416e-15	5.88896e-13	22.9007
APCDD1	-6.24068	-3.61519	-11.912	7.60653e-15	5.88896e-13	22.6161
TNFRSF8	10.0078	3.38175	11.9114	7.61973e-15	5.88896e-13	23.2285
PLAC8	-7.12564	4.05334	-11.8862	8.15037e-15	6.25348e-13	23.5207
LRRK2	-9.18282	0.684628	-11.8855	8.16595e-15	6.25348e-13	23.1883
IL16	-5.27039	5.5779	-11.8721	8.46352e-15	6.4519e-13	23.6107
MIR4496	-5.80916	-3.05217	-11.8565	8.8256e-15	6.69747e-13	22.53
TAGAP	-6.54175	4.70999	-11.8528	8.91371e-15	6.73386e-13	23.4602
LOC374443	-4.70684	4.67684	-11.8424	9.16595e-15	6.89337e-13	23.4739
LOC100505549	-4.11648	3.42571	-11.8347	9.35736e-15	7.0059e-13	23.3366
CDYL2	6.90433	2.15711	11.8189	9.76102e-15	7.27565e-13	22.9395
SOWAHD	-7.99818	-2.1433	-11.7997	1.02777e-14	7.6269e-13	22.6532
FOXO1	-4.39981	5.63519	-11.7959	1.03845e-14	7.67219e-13	23.4082
PSMB5	2.5727	7.17314	11.7856	1.0674e-14	7.85148e-13	23.32
LHFP	7.61389	-0.275196	11.7518	1.1692e-14	8.56274e-13	22.5697
TTC24	-7.76523	0.156638	-11.7445	1.19238e-14	8.69454e-13	22.7715
CLSPN	4.67097	4.61828	11.7361	1.21979e-14	8.85199e-13	23.0915
LINC01237	-6.02573	-2.46441	-11.7346	1.22453e-14	8.85199e-13	22.2986
MSC-AS1	7.50093	0.760593	11.7242	1.25929e-14	9.06418e-13	22.6295
ZNF879	-7.0343	-1.7658	-11.707	1.31927e-14	9.45535e-13	22.4368
LOC101929295	-6.30838	-1.94854	-11.6984	1.35014e-14	9.63542e-13	22.2798
CD69	-6.68699	7.3819	-11.679	1.42279e-14	1.01109e-12	23.0267
KIF4A	7.22097	2.31697	11.6762	1.43363e-14	1.01449e-12	22.5687
ASAP2	6.81943	0.581946	11.6549	1.51871e-14	1.07018e-12	22.4449
HELLS	3.50449	5.46267	11.6471	1.55093e-14	1.08831e-12	23.0023
CPNE5	-8.29296	1.44053	-11.6393	1.58414e-14	1.10344e-12	22.5783
CDKN3	4.8929	4.08612	11.6389	1.58565e-14	1.10344e-12	22.7476
CTTN	7.83966	2.71559	11.6075	1.72655e-14	1.19653e-12	22.4252
SMAD1	7.23268	0.435567	11.6029	1.74839e-14	1.20668e-12	22.2825
ZNF595	-7.51102	0.269928	-11.5998	1.76303e-14	1.2118e-12	22.3859
ALPL	-7.10384	-2.58195	-11.5968	1.77774e-14	1.21692e-12	22.0752
TCL1A	-9.28079	4.27341	-11.5815	1.85296e-14	1.26325e-12	22.6294
CORO2B	-7.27236	-2.93128	-11.5644	1.9411e-14	1.31798e-12	21.9723
HDGFRP3	6.53687	2.63056	11.5601	1.96372e-14	1.32797e-12	22.3421
MYO15B	-6.34972	1.53722	-11.5312	2.12408e-14	1.43064e-12	22.2999
MGST3	4.84026	7.83274	11.5208	2.18517e-14	1.46538e-12	22.6055
RHOH	-4.52818	6.35368	-11.5195	2.19314e-14	1.46538e-12	22.6455
LOC613266	-6.72328	-2.01279	-11.5102	2.24946e-14	1.49705e-12	21.8878
PLA1A	5.47892	1.189	11.5067	2.27103e-14	1.50237e-12	22.0671
ST6GAL1	-5.67161	5.08854	-11.506	2.27537e-14	1.50237e-12	22.6052
LOC101929633	-6.9488	-1.77608	-11.4946	2.34686e-14	1.5435e-12	21.9156
ID2	6.312	8.22995	11.492	2.36374e-14	1.54853e-12	22.5469
CD109	7.75694	-0.664064	11.4815	2.43253e-14	1.58739e-12	21.8275
GABRR2	-5.85816	-2.89467	-11.4796	2.44507e-14	1.58939e-12	21.5945
BBX	-2.48639	7.19239	-11.4607	2.57464e-14	1.66716e-12	22.4181
ITGA4	-4.03547	5.76128	-11.4362	2.75256e-14	1.7755e-12	22.445
TSPAN32	-7.75583	-1.74507	-11.4295	2.80382e-14	1.80164e-12	21.7687
CDCA5	5.35054	4.27813	11.4256	2.83365e-14	1.81386e-12	22.223
HLA-DQB1	-3.51189	8.27801	-11.4062	2.98834e-14	1.90561e-12	22.1805
TMEM136	6.99816	-1.13759	11.4045	3.00158e-14	1.9068e-12	21.6458
GAPDH	2.34677	11.6006	11.3942	3.08809e-14	1.95435e-12	21.9236
ABCB1	-7.9322	1.35658	-11.3879	3.14123e-14	1.98051e-12	21.8939
LOC643733	-7.52211	1.73142	-11.3723	3.2788e-14	2.05097e-12	21.8952
CDCA8	4.28279	4.61715	11.3716	3.28508e-14	2.05097e-12	22.1588
TREML2	-8.05014	1.46593	-11.3699	3.30011e-14	2.05097e-12	21.918
LPAR5	-8.74335	0.0697785	-11.3697	3.3019e-14	2.05097e-12	21.8588
CENPF	4.53816	5.8021	11.3656	3.33994e-14	2.06694e-12	22.2325
TMEM63A	-6.33035	1.87591	-11.3584	3.40617e-14	2.10018e-12	21.8317
LINC00643	-8.24657	-1.1088	-11.3524	3.46259e-14	2.12715e-12	21.7506
CR1	-8.33549	1.39557	-11.3446	3.53812e-14	2.16117e-12	21.8359
HMMR	4.70244	4.48757	11.3437	3.54594e-14	2.16117e-12	22.0389
LAP3	2.39289	7.82094	11.3427	3.55664e-14	2.16117e-12	22.0515
HSH2D	-4.47725	5.60398	-11.3351	3.63087e-14	2.19831e-12	22.174
PRDX3	3.18067	8.59263	11.3189	3.79667e-14	2.28605e-12	21.9607
NETO1	-7.89049	-2.39831	-11.3183	3.80305e-14	2.28605e-12	21.4874
CERNA1	-6.50507	-0.908169	-11.3091	3.89959e-14	2.33572e-12	21.5311
CFLAR	2.40398	8.20347	11.3063	3.93074e-14	2.34053e-12	21.9159
CD22	-5.74424	5.6379	-11.3058	3.93554e-14	2.34053e-12	22.0771
LOC100130357	-6.47789	2.37325	-11.3039	3.95606e-14	2.34442e-12	21.7975
CDC25C	6.4304	1.4618	11.2953	4.05118e-14	2.39234e-12	21.5395
WSB1	-2.40974	7.5453	-11.2785	4.24248e-14	2.49652e-12	21.8844
BEND4	-7.11771	0.565555	-11.2752	4.28183e-14	2.51086e-12	21.5525
MMP11	-7.97604	-1.88257	-11.2684	4.36288e-14	2.54947e-12	21.4061
SIDT1	-7.44202	2.38741	-11.2612	4.4497e-14	2.59118e-12	21.6693
ARHGAP17	-2.91794	5.51589	-11.2581	4.48763e-14	2.60422e-12	21.9613
CECR1	-7.10185	1.22406	-11.2442	4.66295e-14	2.69663e-12	21.5188
IL4R	-2.91603	6.79404	-11.2403	4.7139e-14	2.71673e-12	21.8306
LRIG3	8.74784	-0.61881	11.2203	4.98194e-14	2.86137e-12	21.3448
CYB561A3	-3.6968	7.09811	-11.2142	5.0656e-14	2.89102e-12	21.7477
C1orf21	8.87574	1.22029	11.2141	5.06804e-14	2.89102e-12	21.4393
CDC25A	6.94266	0.695934	11.1937	5.36132e-14	3.04796e-12	21.2536
MSRB1	3.04091	4.63743	11.1892	5.42875e-14	3.07586e-12	21.7507
PRICKLE1	-6.976	2.0189	-11.1745	5.65434e-14	3.19289e-12	21.3867
MCM6	3.23977	6.22804	11.1581	5.91649e-14	3.32971e-12	21.6868
FAM78A	-6.49864	1.2124	-11.1566	5.94155e-14	3.33263e-12	21.2683
LOC100507006	-6.44984	-0.997065	-11.1499	6.05218e-14	3.38337e-12	21.0743
P4HA2	7.17918	2.80461	11.1417	6.19177e-14	3.44991e-12	21.2891
PKHD1L1	-7.93984	-0.954901	-11.1373	6.2669e-14	3.4802e-12	21.1595
CYB5A	2.6155	6.30157	11.1351	6.30563e-14	3.48044e-12	21.5738
E2F5	-3.01461	3.87032	-11.1349	6.30883e-14	3.48044e-12	21.5867
RNASE6	-8.32706	1.82591	-11.1301	6.39283e-14	3.51522e-12	21.2846
CLECL1	-7.07367	0.953167	-11.1277	6.43597e-14	3.52737e-12	21.2005
KIF20A	5.78682	3.25451	11.1205	6.56529e-14	3.58653e-12	21.2431
GATA3	6.28354	2.75629	11.1054	6.84624e-14	3.72786e-12	21.1392
ABHD17C	8.10799	1.55729	11.0974	7.00012e-14	3.79932e-12	21.1127
BTLA	-7.57532	2.07127	-11.0844	7.25906e-14	3.92715e-12	21.1959
CCDC150	6.51656	1.67837	11.0825	7.29734e-14	3.93517e-12	21.0288
TCL1B	-8.02752	-2.10678	-11.0796	7.35495e-14	3.95352e-12	20.8803
CHEK1	3.4747	4.37127	11.0645	7.67032e-14	4.10987e-12	21.347
FUT4	5.1372	3.01019	11.062	7.72383e-14	4.12536e-12	21.1354
2008-09-01	6.55607	2.97372	11.0553	7.86963e-14	4.18989e-12	21.0461
DRAM2	-2.45355	6.76768	-11.039	8.23555e-14	4.37084e-12	21.2656
FXYD5	-3.89097	6.13313	-11.0373	8.27423e-14	4.37751e-12	21.3419
NFATC3	-2.95221	5.82397	-11.0307	8.42715e-14	4.44439e-12	21.3312
CLMN	-6.75706	1.01912	-11.0285	8.47994e-14	4.45822e-12	20.9264
CDCA3	5.0113	3.89778	11.0191	8.70419e-14	4.56181e-12	21.1152
C16orf74	-9.21871	-0.951378	-11.0145	8.81631e-14	4.60618e-12	20.9152
FAM136A	2.73297	7.58914	11.0103	8.92136e-14	4.64659e-12	21.1573
ISOC1	2.67304	5.90399	11.0037	9.08749e-14	4.70619e-12	21.2622
LINC01535	-5.51078	-3.00091	-11.0035	9.09192e-14	4.70619e-12	20.4159
SUB1	1.63318	8.76884	10.9934	9.35131e-14	4.82556e-12	21.0078
ANXA5	2.0558	8.01922	10.9859	9.54889e-14	4.91241e-12	21.0536
FRMD4B	8.24211	0.872686	10.9843	9.59266e-14	4.91983e-12	20.8102
LRMP	-3.63888	6.34499	-10.9804	9.69666e-14	4.95801e-12	21.1608
STMN1	2.85826	7.90886	10.9731	9.89827e-14	5.04571e-12	21.0558
PCED1B-AS1	-5.09931	3.50027	-10.9645	1.01387e-13	5.1526e-12	21.0862
THEM5	6.4672	-0.321646	10.9585	1.03084e-13	5.22304e-12	20.5466
MAST3	-3.48896	4.98598	-10.951	1.0529e-13	5.31872e-12	21.1267
DMC1	6.27836	-0.628594	10.9491	1.05833e-13	5.33008e-12	20.4675
FOXP1	-5.28046	6.52588	-10.9455	1.06912e-13	5.36832e-12	21.0959
ADD3	-4.48866	5.71484	-10.9385	1.09024e-13	5.45802e-12	21.0917
CD79A	-7.99065	5.14614	-10.9263	1.12823e-13	5.63142e-12	21.0354
SIDT2	-4.44545	4.01636	-10.9213	1.14407e-13	5.69355e-12	20.9785
ZNF135	-7.33487	-0.872657	-10.9198	1.14887e-13	5.70052e-12	20.6005
MIR7848	-4.85749	-3.81575	-10.9057	1.19522e-13	5.91301e-12	20.0924
TBC1D7-LOC100130357	-6.51029	0.21839	-10.8848	1.26709e-13	6.25011e-12	20.5242
P2RX5	-6.33323	2.89518	-10.8806	1.28242e-13	6.30719e-12	20.7734
LY9	-6.46085	3.50099	-10.8759	1.29912e-13	6.37065e-12	20.8383
PTGS1	-6.86867	0.603656	-10.8695	1.32301e-13	6.46884e-12	20.5336
ATF7IP	-2.76675	6.83914	-10.8372	1.44828e-13	7.06078e-12	20.717
CAMK1G	8.46871	-1.01131	10.8343	1.46024e-13	7.09478e-12	20.3156
TXNIP	-5.57194	6.87981	-10.8335	1.46371e-13	7.09478e-12	20.7402
POU2AF1	-6.52759	3.10914	-10.8102	1.56261e-13	7.55234e-12	20.6045
WASIR2	-6.40247	-1.46003	-10.8083	1.57129e-13	7.57245e-12	20.1254
NUSAP1	3.34572	6.42185	10.8007	1.60506e-13	7.71301e-12	20.699
SWAP70	-2.91798	7.21997	-10.798	1.61745e-13	7.7483e-12	20.5354
PLEKHA2	-4.98803	5.15285	-10.7971	1.62164e-13	7.7483e-12	20.6909
ADCY7	-4.21226	4.06706	-10.7833	1.68576e-13	8.03177e-12	20.622
CYSLTR1	-7.88352	1.61642	-10.7775	1.71334e-13	8.12299e-12	20.3397
BUB1	3.43482	5.74525	10.7773	1.71459e-13	8.12299e-12	20.6474
TNRC6C-AS1	-7.08108	0.70349	-10.7552	1.82453e-13	8.61947e-12	20.2392
PHF21B	6.42202	-2.53459	10.7526	1.83806e-13	8.64453e-12	19.8089
PARP15	-7.49753	3.50846	-10.7513	1.84479e-13	8.64453e-12	20.4511
STXBP6	7.80818	0.618432	10.7512	1.84529e-13	8.64453e-12	20.1511
FOXC1	7.39741	-0.284956	10.7456	1.87498e-13	8.75913e-12	20.0772
PLEKHG1	-2.72499	5.74601	-10.7393	1.9083e-13	8.87921e-12	20.4888
YES1	6.85735	-0.752312	10.7388	1.91127e-13	8.87921e-12	19.9889
EVI2B	-5.39963	5.01573	-10.7368	1.92195e-13	8.90415e-12	20.5286
LILRB1	-6.82919	2.30943	-10.7264	1.9795e-13	9.14551e-12	20.3052
GTSE1	5.70465	2.76406	10.7223	2.00222e-13	9.22505e-12	20.1833
UBE2J1	-2.57574	6.16618	-10.7193	2.01931e-13	9.27834e-12	20.4244
TMEM54	9.34757	0.540804	10.6729	2.30284e-13	1.05522e-11	20.0121
CBFA2T3	-7.32501	-0.252068	-10.6664	2.34557e-13	1.07187e-11	19.9657
LOC102724552	-5.74358	-1.98101	-10.6631	2.36759e-13	1.07899e-11	19.6615
RRM2	5.64735	5.86747	10.6591	2.39427e-13	1.08819e-11	20.294
RAD54L	3.75552	3.42649	10.6573	2.40703e-13	1.09103e-11	20.1374
P2RX1	-9.00318	-0.430743	-10.6469	2.47922e-13	1.12073e-11	19.9865
AREG	-5.94163	-2.09385	-10.6436	2.5024e-13	1.12816e-11	19.655
TLR9	-7.35678	0.226237	-10.6365	2.553e-13	1.14789e-11	19.9204
PTTG1	3.08053	6.53325	10.6335	2.57517e-13	1.15476e-11	20.2071
SLAMF6	-7.99715	2.79076	-10.6319	2.5867e-13	1.15684e-11	20.0448
LOC283194	-6.48204	-0.492476	-10.6211	2.66724e-13	1.18969e-11	19.7976
ZNF256	-7.31332	-1.02236	-10.618	2.69049e-13	1.19688e-11	19.7998
RTN1	8.79917	-0.906528	10.6109	2.74589e-13	1.21829e-11	19.7468
TCL6	-6.7037	-0.465274	-10.6071	2.77526e-13	1.22807e-11	19.7607
LOC102724323	-5.34331	-3.84333	-10.5945	2.87657e-13	1.26955e-11	19.3382
SP140L	-3.72594	5.36105	-10.5932	2.88719e-13	1.27089e-11	20.1324
CASP4	-4.92576	4.9509	-10.5797	2.99999e-13	1.31709e-11	20.0879
AIM1L	-6.18577	-1.88798	-10.5774	3.01975e-13	1.3223e-11	19.4719
TCF4	-2.68476	7.38169	-10.5733	3.05543e-13	1.33444e-11	19.9185
CCR6	-6.8679	4.23308	-10.571	3.0754e-13	1.33968e-11	20.0249
PTPN6	-3.89473	7.12521	-10.5622	3.15327e-13	1.37004e-11	19.8814
HSP90B1	1.98862	9.50378	10.5545	3.22325e-13	1.39682e-11	19.709
MPEG1	-8.56719	0.0782109	-10.5526	3.24117e-13	1.40097e-11	19.744
ZNF318	-4.45137	5.16328	-10.5463	3.29933e-13	1.42244e-11	20.0028
PLEKHA5	8.06346	-0.186809	10.5406	3.35335e-13	1.44203e-11	19.5672
GGA2	-3.16367	7.02207	-10.5307	3.44958e-13	1.47962e-11	19.8319
BATF3	8.12884	5.47246	10.5242	3.51409e-13	1.50138e-11	19.8388
TGFB2	-6.10917	-2.53471	-10.5238	3.51823e-13	1.50138e-11	19.3059
LOC105376805	-6.16283	0.750849	-10.521	3.54592e-13	1.50936e-11	19.6486
RAB9A	2.96489	6.13838	10.518	3.57621e-13	1.5184e-11	19.8865
LOC90768	7.75563	-1.51683	10.5164	3.59281e-13	1.52159e-11	19.3847
CCL28	-6.50225	-0.0102255	-10.5152	3.60504e-13	1.52292e-11	19.5727
LRRC20	8.24456	0.470285	10.5141	3.61621e-13	1.52381e-11	19.5501
SLC16A5	-5.95767	-2.67781	-10.5119	3.63947e-13	1.52976e-11	19.2483
LINC00324	-3.86708	1.86431	-10.5049	3.71284e-13	1.55568e-11	19.6516
LOC101927954	-5.60947	-2.36154	-10.5043	3.71967e-13	1.55568e-11	19.2368
IFNLR1	-6.60819	0.347929	-10.4956	3.81262e-13	1.59058e-11	19.4837
CAV1	8.06135	2.6587	10.4718	4.08056e-13	1.69814e-11	19.495
LAIR1	-7.2397	2.52099	-10.4625	4.19078e-13	1.73969e-11	19.5542
MAD2L1	3.2999	5.69184	10.4609	4.20967e-13	1.74322e-11	19.764
LOC100505715	-6.66631	0.148738	-10.4597	4.22461e-13	1.7451e-11	19.422
PTK2B	-4.52139	5.37184	-10.4529	4.308e-13	1.77292e-11	19.7388
FCMR	-6.84076	4.79181	-10.4525	4.31312e-13	1.77292e-11	19.7388
EAF2	-2.68796	6.40953	-10.4479	4.36962e-13	1.78865e-11	19.5995
ZNF229	-6.73924	-2.37523	-10.4477	4.3727e-13	1.78865e-11	19.1979
KIAA0922	-6.0331	4.8414	-10.4294	4.60714e-13	1.87996e-11	19.6477
SEMA4C	7.93397	-0.431498	10.4279	4.62682e-13	1.88341e-11	19.2342
ZNF880	-6.78907	1.2034	-10.4266	4.64493e-13	1.8862e-11	19.4188
KCNMA1	7.57755	2.88913	10.4165	4.78067e-13	1.93663e-11	19.3699
TJP2	7.12729	2.61634	10.4096	4.87596e-13	1.97047e-11	19.3162
NEK2	6.71409	2.06212	10.4057	4.93181e-13	1.98826e-11	19.2739
NEIL1	-8.35176	2.34095	-10.3992	5.024e-13	2.02056e-11	19.3613
TBXA2R	-6.45675	-2.56652	-10.3976	5.04676e-13	2.02486e-11	19.0026
GCAT	8.26436	0.750466	10.3957	5.07497e-13	2.03132e-11	19.2475
ZIK1	-7.36168	-1.05498	-10.3915	5.13584e-13	2.05079e-11	19.1948
ATOX1	2.50631	5.96313	10.3859	5.2199e-13	2.0794e-11	19.512
RAB37	-7.14687	0.925494	-10.3802	5.30549e-13	2.10849e-11	19.2619
RFC4	2.10503	6.71956	10.3781	5.33748e-13	2.11619e-11	19.435
RUBCNL	-6.24909	4.59575	-10.373	5.41544e-13	2.14204e-11	19.5039
ALOX5	-8.90096	2.24305	-10.3722	5.42831e-13	2.14208e-11	19.3161
TMEM229B	-6.82695	-0.623668	-10.37	5.46357e-13	2.15093e-11	19.0484
ZCCHC7	-2.45204	6.57851	-10.3622	5.58623e-13	2.19294e-11	19.3713
VIM	2.85394	8.7935	10.3616	5.59642e-13	2.19294e-11	19.23
HMGB3	5.65034	3.73714	10.3585	5.646e-13	2.2072e-11	19.2931
BIN2	-5.87065	3.80219	-10.3493	5.79708e-13	2.261e-11	19.4094
TRAF1	4.87789	6.30635	10.3476	5.82666e-13	2.26726e-11	19.4378
DAPK1	9.42837	1.61059	10.3467	5.84179e-13	2.26789e-11	19.1807
DTX1	-6.83906	0.534999	-10.3456	5.86e-13	2.2697e-11	19.1436
ZNF154	-6.84233	1.08457	-10.3415	5.93013e-13	2.29157e-11	19.1615
MOB3A	-3.38092	5.77165	-10.3198	6.31037e-13	2.4329e-11	19.3364
SPAG5	4.49588	5.18723	10.3173	6.35611e-13	2.44492e-11	19.341
FGR	-6.95691	0.782706	-10.3104	6.48349e-13	2.4882e-11	19.0988
EPDR1	8.0026	-0.0230961	10.3059	6.56947e-13	2.51545e-11	18.9924
SLCO3A1	7.45948	2.6815	10.3038	6.60948e-13	2.525e-11	19.053
CD72	-8.09103	4.02812	-10.2962	6.75599e-13	2.57511e-11	19.2441
VSTM2L	7.88664	-1.1791	10.292	6.83641e-13	2.59985e-11	18.8236
LINC00665	-7.26362	-0.0323032	-10.2855	6.96574e-13	2.6421e-11	18.9603
GPCPD1	-2.45204	5.53101	-10.2847	6.98361e-13	2.6421e-11	19.2176
CHAF1B	3.5859	3.91178	10.2841	6.99476e-13	2.6421e-11	19.1947
IQCG	5.34968	6.36981	10.2808	7.06081e-13	2.66105e-11	19.2512
CCT5	1.88261	8.83649	10.2691	7.30349e-13	2.74634e-11	18.9447
CPED1	-6.94741	-1.15233	-10.2636	7.42146e-13	2.78446e-11	18.77
MUC12	6.70744	-1.62035	10.2585	7.53167e-13	2.8195e-11	18.6718
PTPRC	-4.90084	7.61708	-10.2338	8.08711e-13	3.02069e-11	18.9528
BUB1B	7.1218	3.24343	10.233	8.10683e-13	3.02133e-11	18.8802
ST6GALNAC3	-6.48378	-1.36532	-10.212	8.61455e-13	3.20343e-11	18.6263
LAT2	-4.18966	6.24861	-10.2077	8.7211e-13	3.23588e-11	18.9626
ZBTB16	-7.20863	-1.65196	-10.2054	8.78042e-13	3.25069e-11	18.6094
PGRMC1	3.49602	4.75026	10.2035	8.82788e-13	3.26107e-11	19.0248
NTNG1	-6.33999	-3.0603	-10.1976	8.98103e-13	3.31035e-11	18.4374
ZNF600	-6.51698	2.32148	-10.1926	9.11128e-13	3.34528e-11	18.8124
CBX2	7.03937	-1.56855	10.1923	9.11848e-13	3.34528e-11	18.4538
CEACAM21	-5.50417	1.79461	-10.1915	9.13981e-13	3.34528e-11	18.8112
FMO5	-7.56915	-0.277572	-10.1909	9.15559e-13	3.34528e-11	18.6931
GRAPL	-5.96913	-3.0167	-10.1899	9.18258e-13	3.34785e-11	18.3927
SIPA1L1	-3.6945	4.86385	-10.1818	9.40019e-13	3.41975e-11	18.9755
ZNF223	-6.67483	-1.91421	-10.1785	9.48938e-13	3.44473e-11	18.5087
KDF1	-5.74455	-3.36327	-10.1762	9.55427e-13	3.46079e-11	18.3119
ATP6V1G1	-2.07528	7.6142	-10.1727	9.65051e-13	3.48812e-11	18.7328
ERP27	-6.58576	-0.928163	-10.1681	9.78002e-13	3.52733e-11	18.5441
CD55	-2.6669	5.99254	-10.1655	9.85461e-13	3.5466e-11	18.8531
HHEX	-5.35802	3.58647	-10.1614	9.97163e-13	3.58103e-11	18.8809
MILR1	-7.00733	-1.35796	-10.1524	1.02364e-12	3.66828e-11	18.5085
RERE	-2.41843	5.10961	-10.15	1.03087e-12	3.68105e-11	18.8693
WNT5A	9.58963	1.71778	10.1497	1.0316e-12	3.68105e-11	18.6511
LRR1	2.46482	5.26369	10.1482	1.03629e-12	3.68993e-11	18.8746
IRF8	-4.86603	5.95154	-10.1266	1.10327e-12	3.92011e-11	18.7436
KIF23	6.61359	3.86722	10.1225	1.11648e-12	3.95867e-11	18.6291
TMEM106C	2.06443	6.71406	10.1188	1.12838e-12	3.99242e-11	18.6939
ERC2	10.1574	0.290611	10.1004	1.19038e-12	4.20293e-11	18.5175
LOC105375218	-5.62493	-1.78796	-10.0981	1.1985e-12	4.2227e-11	18.2409
TREM1	-6.3011	-3.00308	-10.0973	1.20115e-12	4.22318e-11	18.1781
ARL3	3.16688	4.76174	10.0938	1.21362e-12	4.25809e-11	18.721
CR2	-4.28992	6.346	-10.0827	1.25331e-12	4.38103e-11	18.5912
CEP295NL	-5.13733	-3.55007	-10.0825	1.25389e-12	4.38103e-11	18.0336
ELOVL7	8.50963	-1.01452	10.0768	1.27519e-12	4.44619e-11	18.3445
ZNF781	-6.42977	-1.96958	-10.0499	1.37907e-12	4.79841e-11	18.1433
BHLHE41	-7.04133	0.301254	-10.0464	1.39289e-12	4.83646e-11	18.3181
ATP1A4	8.6361	-0.436291	10.0452	1.398e-12	4.8442e-11	18.2761
SH2D3C	-7.26196	2.23209	-10.0401	1.41889e-12	4.90645e-11	18.3964
TNFRSF13B	-8.98299	-0.2843	-10.0312	1.45613e-12	5.02483e-11	18.3277
UBE2T	3.17315	5.4228	10.028	1.46976e-12	5.06146e-11	18.5363
TLR10	-8.46356	2.8441	-10.0253	1.48136e-12	5.09095e-11	18.3975
ZNF841	-7.21266	-0.888217	-10.0236	1.48863e-12	5.10548e-11	18.2265
SDSL	8.24092	0.423364	10.0201	1.50415e-12	5.14818e-11	18.2347
SOCS2-AS1	7.03619	-2.03653	10.0134	1.53364e-12	5.23843e-11	17.9883
DIAPH3	6.02125	1.6835	10.0073	1.56122e-12	5.32178e-11	18.1677
FAS	3.5713	6.12582	10.002	1.58557e-12	5.39384e-11	18.4428
CENPU	4.33857	4.59726	10.0004	1.5931e-12	5.40318e-11	18.4348
NDFIP2	5.75094	3.61221	10	1.59476e-12	5.40318e-11	18.3121
ZHX2	-4.00357	4.15245	-9.99357	1.62514e-12	5.49501e-11	18.4231
BFSP2	-6.69867	-0.813989	-9.99186	1.63327e-12	5.51139e-11	18.073
TRAF5	-6.11946	4.14022	-9.98721	1.65561e-12	5.57556e-11	18.3885
SEC11C	2.5564	7.71568	9.98347	1.67377e-12	5.61974e-11	18.2074
CASP1	-6.43658	3.90497	-9.98313	1.67543e-12	5.61974e-11	18.3314
PLCB2	-6.67022	0.96092	-9.97943	1.69367e-12	5.66957e-11	18.1738
PBX1	8.49733	-0.363999	9.97346	1.72349e-12	5.7579e-11	18.0875
LOC100130950	-4.61131	-0.467413	-9.96288	1.77763e-12	5.92306e-11	17.8986
TTF2	2.26792	5.70844	9.96242	1.77999e-12	5.92306e-11	18.3105
ZWINT	5.60414	4.99979	9.96017	1.79177e-12	5.95045e-11	18.3025
YPEL1	-5.24857	1.46297	-9.95853	1.80036e-12	5.96718e-11	18.0748
LOC102723649	8.22129	-1.1685	9.95494	1.81939e-12	6.00956e-11	17.9582
MYCL	8.23489	-1.21743	9.95427	1.82296e-12	6.00956e-11	17.9399
ANAPC16	-1.41621	7.83346	-9.95409	1.8239e-12	6.00956e-11	18.0729
UBAC2	-1.96167	5.88925	-9.9499	1.84638e-12	6.07171e-11	18.2377
FAM212A	-6.70049	0.0313783	-9.94355	1.88104e-12	6.17356e-11	17.9849
SORL1	-5.72721	4.42358	-9.94219	1.88855e-12	6.1861e-11	18.2404
EZH2	3.78491	5.7265	9.94119	1.89406e-12	6.19205e-11	18.284
HLA-DPB2	-5.23772	0.487319	-9.94028	1.89911e-12	6.1965e-11	18.0006
GGH	3.49836	4.96764	9.92918	1.96186e-12	6.38882e-11	18.2527
ZNF573	-7.12079	0.633658	-9.92708	1.97393e-12	6.41567e-11	18.0081
AAK1	4.30545	3.72352	9.92467	1.98796e-12	6.44877e-11	18.1438
SMAD3	-5.33588	3.7237	-9.91862	2.02351e-12	6.5514e-11	18.1702
ZNF582	-6.78623	-1.58568	-9.91722	2.03178e-12	6.56552e-11	17.8474
APOBEC3B	6.08127	3.61696	9.91557	2.04166e-12	6.58476e-11	18.07
FLI1	-6.55095	3.6752	-9.91487	2.04583e-12	6.58553e-11	18.1098
SPR	8.07138	-0.108133	9.9009	2.13138e-12	6.84585e-11	17.8455
GMNN	3.20796	5.1837	9.90034	2.13486e-12	6.84585e-11	18.171
CLK1	-1.90424	7.77748	-9.89822	2.14817e-12	6.87538e-11	17.9049
KCNG1	-8.61839	-1.93147	-9.89624	2.1607e-12	6.90229e-11	17.8519
GMFG	-3.91668	5.6758	-9.89422	2.17352e-12	6.93007e-11	18.0976
NEIL3	7.6149	0.560549	9.89259	2.18395e-12	6.9501e-11	17.8323
HOXA5	6.14715	-2.1836	9.89192	2.18821e-12	6.95047e-11	17.5964
SHB	7.08469	0.208697	9.88482	2.2343e-12	7.08344e-11	17.7854
CCDC141	-7.84307	1.47981	-9.88031	2.26403e-12	7.16418e-11	17.9187
TSFM	2.10401	5.76341	9.87201	2.31988e-12	7.32705e-11	18.0402
MTCL1	-6.37763	-0.503524	-9.86731	2.35211e-12	7.41488e-11	17.7166
SMAGP	-3.54036	1.81465	-9.86624	2.35954e-12	7.42436e-11	17.9164
LOC102724163	-5.52936	-3.67917	-9.86169	2.3913e-12	7.51019e-11	17.467
FAM72C	5.34315	-2.41725	9.85855	2.41346e-12	7.55821e-11	17.4682
CCDC50	1.9576	7.6903	9.85825	2.4156e-12	7.55821e-11	17.7952
DOCK8	-5.17797	4.87907	-9.85677	2.42612e-12	7.57699e-11	18.0452
SIGLEC6	-6.76947	-1.75412	-9.84123	2.53947e-12	7.91625e-11	17.638
MLEC	2.31354	6.24063	9.83948	2.55259e-12	7.9424e-11	17.9242
GBGT1	-6.62279	-1.04248	-9.8241	2.67069e-12	8.29446e-11	17.6394
CDK1	6.0133	5.01147	9.82028	2.70084e-12	8.37262e-11	17.8911
MGAT5	-4.20023	4.67081	-9.81689	2.72795e-12	8.44104e-11	17.9278
NLRP1	-3.12813	5.56087	-9.80969	2.7864e-12	8.60603e-11	17.8802
CD48	-4.91598	5.07457	-9.7975	2.88816e-12	8.90391e-11	17.8727
SYPL1	-2.42546	7.22008	-9.79639	2.89766e-12	8.9168e-11	17.6825
SKA3	5.26827	2.79191	9.79487	2.91065e-12	8.9293e-11	17.6704
LINC01480	-5.67481	1.13509	-9.79467	2.91236e-12	8.9293e-11	17.6713
MKI67	4.98138	5.52504	9.7821	3.02227e-12	9.24936e-11	17.8226
LOC100128398	-5.8849	-2.70852	-9.77499	3.08626e-12	9.428e-11	17.3185
TNFRSF9	9.04505	3.84619	9.76928	3.13866e-12	9.57063e-11	17.6231
RAN	1.74093	9.43526	9.74347	3.38702e-12	1.03092e-10	17.344
SSR3	2.15378	6.96045	9.74044	3.4175e-12	1.03831e-10	17.5549
MIR378I	-6.82669	0.00595393	-9.73599	3.46273e-12	1.05015e-10	17.4632
CSAG4	5.53737	-2.71494	9.73483	3.4746e-12	1.05185e-10	17.1227
SCD5	6.85946	-0.996644	9.72869	3.53817e-12	1.06916e-10	17.2401
LOC339260	-5.48692	-3.46322	-9.72558	3.57081e-12	1.07709e-10	17.0956
LINC01857	-6.89964	1.43496	-9.71925	3.63827e-12	1.09547e-10	17.4741
SH3BP5	-7.61536	0.361921	-9.71768	3.65512e-12	1.09857e-10	17.4109
2001-03-01	-6.11129	4.31855	-9.70605	3.78301e-12	1.13497e-10	17.5886
ABLIM1	-5.02227	5.29294	-9.69797	3.87447e-12	1.16034e-10	17.5869
SMC4	1.89705	7.1315	9.6972	3.88338e-12	1.16093e-10	17.427
POC1A	5.01097	2.81271	9.68452	4.03175e-12	1.20314e-10	17.3918
TROAP	7.37661	2.68078	9.67954	4.09172e-12	1.21887e-10	17.3403
TRAF3IP3	-4.13043	5.865	-9.67524	4.14403e-12	1.23226e-10	17.4893
ZDHHC19	-5.88345	-3.05307	-9.67335	4.16734e-12	1.237e-10	17.0238
TOP2A	4.85242	6.20091	9.67227	4.18074e-12	1.23878e-10	17.5118
SYN1	7.37634	-1.91766	9.67062	4.20112e-12	1.24263e-10	17.1078
MYO1E	-6.04888	1.31203	-9.66992	4.20983e-12	1.24301e-10	17.2963
CIITA	-3.58799	6.44525	-9.66742	4.24117e-12	1.25007e-10	17.3852
PATL2	-5.38046	2.64944	-9.66029	4.33168e-12	1.2745e-10	17.3697
GRAMD1B	4.62233	2.63047	9.65653	4.3803e-12	1.28609e-10	17.301
PGAM1	2.35518	6.00867	9.6558	4.38974e-12	1.28609e-10	17.4039
SPIRE1	6.06779	1.14802	9.65547	4.39407e-12	1.28609e-10	17.1804
GRIK4	6.53388	-2.15908	9.65136	4.44788e-12	1.29957e-10	17.0102
FAM227A	7.93061	0.939148	9.64672	4.50952e-12	1.31529e-10	17.2196
RABEP1	-1.84171	5.8168	-9.64518	4.53006e-12	1.31899e-10	17.3493
C4orf3	-1.52562	7.38221	-9.63698	4.6416e-12	1.34912e-10	17.1788
LOC101929188	-5.27588	-2.36844	-9.63283	4.69906e-12	1.36346e-10	16.8976
MYL6B	2.45644	5.17695	9.63059	4.73046e-12	1.3702e-10	17.3808
C19orf18	-5.58703	-2.959	-9.62928	4.74885e-12	1.37214e-10	16.8806
ITSN2	-1.89549	7.44333	-9.62895	4.75351e-12	1.37214e-10	17.1361
C1orf53	6.65265	-1.32297	9.62319	4.83539e-12	1.39337e-10	16.9515
PDGFRL	7.72136	-1.18033	9.62136	4.86171e-12	1.39856e-10	16.9908
RBFOX2	8.41688	-0.0815561	9.61463	4.9598e-12	1.42433e-10	17.0955
HLA-DRA	-2.57057	11.2636	-9.61182	5.00145e-12	1.43383e-10	16.7619
MBOAT2	8.45188	2.58279	9.61053	5.02058e-12	1.43686e-10	17.1516
KIF7	5.66704	-2.9415	9.60947	5.03644e-12	1.43895e-10	16.7837
BTN2A1	-2.51102	4.85886	-9.5925	5.29673e-12	1.51074e-10	17.2667
MDH1	1.94354	9.06329	9.58975	5.34017e-12	1.52054e-10	16.9201
LOC101927497	6.25236	-2.02319	9.58851	5.35991e-12	1.52358e-10	16.8193
HLA-DQB1-AS1	-6.50755	0.344695	-9.58672	5.3886e-12	1.52914e-10	17.035
CDCA2	6.66071	1.91876	9.58584	5.40272e-12	1.53056e-10	17.0364
TUBB	2.02904	9.08421	9.58152	5.47243e-12	1.54769e-10	16.9099
TPD52	-1.80098	6.56235	-9.57797	5.53061e-12	1.56151e-10	17.0762
DEPDC1	6.4112	2.3318	9.57375	5.60039e-12	1.57856e-10	17.0111
ENO1	1.96999	10.7849	9.56153	5.80773e-12	1.63425e-10	16.6908
USP6NL	-3.79189	3.08462	-9.55434	5.93334e-12	1.6668e-10	17.1401
SMCHD1	-2.2282	6.37025	-9.55339	5.95001e-12	1.66869e-10	17.0228
VPS37B	-7.83834	1.45727	-9.55279	5.9607e-12	1.6689e-10	16.9986
PRAG1	-5.94905	0.472728	-9.55022	6.00642e-12	1.6789e-10	16.8888
TNFSF12	-5.62082	-0.0944844	-9.54928	6.02325e-12	1.6808e-10	16.8722
IER3	5.63199	3.31281	9.5396	6.19945e-12	1.72709e-10	17.0324
SLC2A3	-3.1146	7.38012	-9.53882	6.21377e-12	1.72821e-10	16.9006
GYPE	-6.01481	-1.5968	-9.53708	6.24613e-12	1.73434e-10	16.7467
EXO1	7.06232	3.81192	9.52657	6.44472e-12	1.78652e-10	16.9581
ZNF101	-2.07579	5.10249	-9.52539	6.46756e-12	1.78989e-10	17.0505
KMT2E	-2.02298	7.86074	-9.5229	6.51561e-12	1.80022e-10	16.7949
PBK	6.33351	2.97148	9.52051	6.56222e-12	1.81011e-10	16.8996
KAZN	7.48955	-0.581792	9.5133	6.70472e-12	1.84639e-10	16.751
SPC25	4.93013	3.20981	9.51249	6.72101e-12	1.84784e-10	16.923
BCL2L1	3.76792	4.01709	9.51089	6.75323e-12	1.85366e-10	17.0145
IKZF3	-3.3722	6.82295	-9.50985	6.77418e-12	1.85637e-10	16.8992
RAP1GAP2	-6.18052	-1.91063	-9.50759	6.81991e-12	1.86585e-10	16.6442
IDI1	-1.60187	7.46477	-9.50503	6.87224e-12	1.87711e-10	16.7842
SYVN1	-2.69331	4.41351	-9.50055	6.96466e-12	1.89926e-10	17.0115
AEBP1	-6.84855	-1.68899	-9.49716	7.03537e-12	1.91542e-10	16.6816
LOC105375713	-5.71245	-2.12238	-9.49491	7.08279e-12	1.92521e-10	16.5667
FAM84B	-6.80878	-1.31188	-9.48804	7.22944e-12	1.96189e-10	16.6778
ZNF791	-3.18454	5.41209	-9.48114	7.38002e-12	1.99952e-10	16.911
CX3CL1	10.4085	0.642801	9.48041	7.39604e-12	2.00063e-10	16.7913
MIR650	-7.44331	-0.776848	-9.47008	7.62769e-12	2.05997e-10	16.7285
INPP5D	-3.54065	5.79561	-9.46212	7.81133e-12	2.10617e-10	16.8238
PDIA6	1.92558	8.08429	9.45201	8.05092e-12	2.16729e-10	16.5827
DLGAP5	5.39267	4.29232	9.44774	8.15433e-12	2.19161e-10	16.7948
PCED1B	-6.12596	2.38443	-9.43935	8.36156e-12	2.24371e-10	16.7419
CCL17	8.53859	8.63554	9.42471	8.73577e-12	2.34038e-10	16.6607
SAT1	-2.48244	7.59623	-9.4152	8.98801e-12	2.40411e-10	16.4722
SHOX2	7.03124	-1.78755	9.41352	9.03343e-12	2.41241e-10	16.3633
ZNF75A	-2.28897	4.68898	-9.40991	9.13135e-12	2.43469e-10	16.7281
NIPSNAP3B	-4.4272	1.24555	-9.40776	9.19038e-12	2.44654e-10	16.6124
SKA1	4.8095	2.70205	9.39912	9.43135e-12	2.50671e-10	16.5629
IGLL5	-6.75746	4.57675	-9.39779	9.46894e-12	2.51272e-10	16.7121
ORAI2	-3.93783	5.77384	-9.39663	9.50198e-12	2.5175e-10	16.638
CKAP2L	5.91946	3.01098	9.38954	9.70597e-12	2.56749e-10	16.5427
CENPO	3.53922	3.39841	9.38711	9.77681e-12	2.58216e-10	16.6176
SEC62	-1.81363	7.40084	-9.38138	9.94623e-12	2.62277e-10	16.4199
TPP1	-2.0163	6.74134	-9.38073	9.9656e-12	2.62375e-10	16.4732
CENPW	3.38001	3.98286	9.37957	1.00004e-11	2.62878e-10	16.6389
LDOC1	-6.99155	-0.638127	-9.37732	1.00681e-11	2.64245e-10	16.4355
TRIM22	-3.43302	6.53868	-9.37339	1.01873e-11	2.66956e-10	16.4304
SH3BP2	-3.08669	4.92331	-9.36201	1.05413e-11	2.75799e-10	16.5892
HSPA4L	6.98802	0.211951	9.36088	1.05771e-11	2.76307e-10	16.3259
EZR	-2.11066	8.31344	-9.35769	1.06787e-11	2.78526e-10	16.2698
MPHOSPH6	2.40614	6.08856	9.35149	1.08793e-11	2.83319e-10	16.4848
PCDH9	-7.14429	1.45055	-9.34929	1.09514e-11	2.84753e-10	16.4289
THRB	-6.71307	-1.77251	-9.34525	1.10849e-11	2.87778e-10	16.2429
SEC23B	2.18769	6.94624	9.34276	1.11683e-11	2.89496e-10	16.3697
HJURP	5.87325	3.59866	9.34188	1.11978e-11	2.89811e-10	16.4448
FMNL2	5.55094	3.16976	9.34103	1.12264e-11	2.90105e-10	16.4505
BOLA3	2.79962	5.17156	9.34021	1.12541e-11	2.90374e-10	16.5312
TNFSF13	-6.10862	-0.745145	-9.33775	1.13376e-11	2.92077e-10	16.2305
CELF2	-4.64063	5.94803	-9.33282	1.15067e-11	2.95979e-10	16.4875
SYT11	3.21755	5.01212	9.33106	1.15677e-11	2.97094e-10	16.5155
ICOSLG	-7.23084	1.25444	-9.32659	1.17241e-11	3.0065e-10	16.3557
SMCO2	6.11792	-2.53662	9.32376	1.18241e-11	3.02752e-10	16.0552
LOC101929163	-6.15322	-0.34749	-9.31993	1.19608e-11	3.05786e-10	16.2286
LOC101928617	-3.69062	2.63956	-9.31135	1.22735e-11	3.13302e-10	16.4253
ZNF844	-6.92647	-0.813046	-9.29251	1.29889e-11	3.31058e-10	16.1977
DST	8.41108	3.40983	9.28937	1.31123e-11	3.33697e-10	16.2614
PPM1H	8.30693	-0.0967315	9.28821	1.31582e-11	3.34357e-10	16.1715
NCAPH	6.4115	3.40862	9.28693	1.32089e-11	3.35034e-10	16.2678
STEAP3	8.14348	1.33999	9.28653	1.32248e-11	3.35034e-10	16.2189
LINC00494	-7.03276	0.107043	-9.27785	1.35748e-11	3.43383e-10	16.2012
CDC45	6.53373	3.68859	9.27726	1.3599e-11	3.43478e-10	16.2668
NLRC3	-6.37804	2.03592	-9.27551	1.36708e-11	3.44772e-10	16.2435
C8orf89	-6.29097	-3.25413	-9.2716	1.38328e-11	3.48334e-10	15.9416
C12orf74	-5.78296	-1.9979	-9.26999	1.39001e-11	3.49503e-10	15.9948
PSMA8	-6.33128	-2.06553	-9.26196	1.42404e-11	3.57523e-10	15.9768
KSR2	8.93936	0.220938	9.25284	1.46369e-11	3.6661e-10	16.1121
HLA-DPA1	-2.05813	10.138	-9.25264	1.4646e-11	3.6661e-10	15.769
ZNF701	-6.11464	0.804097	-9.25077	1.47288e-11	3.68132e-10	16.1335
ARHGAP22	-6.86784	-0.796927	-9.24572	1.49543e-11	3.73213e-10	16.0281
YWHAQ	2.93411	9.14787	9.24257	1.50972e-11	3.76219e-10	15.8795
CAMSAP2	7.19979	1.26607	9.23978	1.52246e-11	3.78778e-10	16.0564
ZNF667	-7.30364	-1.62153	-9.23934	1.52451e-11	3.78778e-10	16.0106
AKNA	-3.53593	4.11509	-9.2365	1.53761e-11	3.81468e-10	16.2375
GRB2	-1.53672	7.75137	-9.2316	1.56051e-11	3.86577e-10	15.9133
CD53	-3.18314	8.31998	-9.22812	1.57696e-11	3.89744e-10	15.8504
EPHA10	6.1384	-2.1073	9.22791	1.57794e-11	3.89744e-10	15.8256
CLIC2	8.35528	3.79412	9.22131	1.60968e-11	3.96999e-10	16.0878
TSPAN13	-6.04933	3.48053	-9.21701	1.63073e-11	4.01599e-10	16.1543
RAC2	-1.88422	8.86496	-9.20201	1.70626e-11	4.19584e-10	15.7305
BTN3A1	-2.71155	4.93709	-9.19434	1.74626e-11	4.28793e-10	16.0834
ZNF423	7.32092	-1.15773	9.18362	1.80372e-11	4.42253e-10	15.7837
ST3GAL1	-4.21183	5.34481	-9.17793	1.83502e-11	4.49273e-10	16.0412
NIPAL4	-6.10037	-1.397	-9.17692	1.84066e-11	4.49997e-10	15.7898
KIF14	6.26033	2.54022	9.17308	1.86215e-11	4.54588e-10	15.8969
TOR4A	-5.63465	0.286965	-9.17145	1.87134e-11	4.56165e-10	15.8024
RNF208	6.15753	-2.10544	9.16909	1.88471e-11	4.58759e-10	15.6515
ZNF665	-6.40041	-1.27525	-9.1576	1.95141e-11	4.74305e-10	15.7614
RHOBTB2	-6.24543	2.38853	-9.15245	1.98205e-11	4.81056e-10	15.8988
KDM7A	-4.22547	4.02707	-9.14507	2.0268e-11	4.91207e-10	15.9615
ATP5B	1.66415	10.1465	9.14257	2.04217e-11	4.94216e-10	15.4728
ZNF354B	-5.6859	0.0964532	-9.13438	2.09343e-11	5.05893e-10	15.7276
PECAM1	-6.54108	0.559962	-9.12794	2.13466e-11	5.15113e-10	15.7455
LPIN1	-2.28807	6.15502	-9.11965	2.18899e-11	5.27464e-10	15.7617
RNF122	-5.20381	-0.893386	-9.11477	2.22157e-11	5.34547e-10	15.5465
ZNF542P	-7.19983	-0.127128	-9.10716	2.27341e-11	5.46237e-10	15.7054
LDHA	1.95931	9.99568	9.1059	2.28211e-11	5.47542e-10	15.3833
METTL7A	-5.47571	3.12664	-9.1034	2.29951e-11	5.50929e-10	15.8077
RASA2	-2.41407	5.28034	-9.09804	2.33715e-11	5.59149e-10	15.7756
NUP88	-1.70632	6.82035	-9.09651	2.34806e-11	5.60958e-10	15.606
ACOT7	5.25147	4.1252	9.09555	2.35489e-11	5.61791e-10	15.7858
NUDT5	1.78162	6.71331	9.0938	2.3674e-11	5.63973e-10	15.6375
TMEM237	4.97559	3.37695	9.0889	2.40286e-11	5.71609e-10	15.731
KLHL5	-2.29406	5.09331	-9.084	2.43884e-11	5.79345e-10	15.7469
FAM3C	-2.70188	3.8589	-9.08184	2.45489e-11	5.82333e-10	15.78
STXBP5L	6.78941	-2.3158	9.07756	2.487e-11	5.89117e-10	15.4242
JAK1	-1.99082	7.13815	-9.07694	2.49167e-11	5.8939e-10	15.5262
LOC101927243	-5.44358	-3.8775	-9.07447	2.51044e-11	5.92994e-10	15.3219
RIMKLA	6.70009	-1.68563	9.073	2.52162e-11	5.94797e-10	15.3926
IDI2-AS1	-3.6511	2.88486	-9.07055	2.54043e-11	5.98393e-10	15.7179
B4GALNT1	7.73622	-1.64894	9.05957	2.62654e-11	6.17809e-10	15.3962
DUS2	-2.1746	5.10677	-9.05896	2.63148e-11	6.18102e-10	15.6585
AMIGO2	-5.6001	2.2381	-9.05547	2.65951e-11	6.23814e-10	15.6397
PSMD7	1.88537	8.27859	9.05037	2.70106e-11	6.32675e-10	15.3519
TSEN15	2.25241	5.97378	9.04651	2.73287e-11	6.39231e-10	15.5779
CCSER1	-6.09451	0.757439	-9.04058	2.78254e-11	6.49945e-10	15.5497
JMJD1C	-2.59008	6.90221	-9.03819	2.80286e-11	6.5378e-10	15.412
TENM3	8.59148	-0.187355	9.03607	2.82096e-11	6.57088e-10	15.471
TMEM97	3.79359	4.52523	9.03328	2.84501e-11	6.61772e-10	15.6327
RNF141	-2.233	5.86639	-9.03266	2.85036e-11	6.62097e-10	15.5176
DDX1	1.58289	7.14007	9.03007	2.87292e-11	6.66413e-10	15.3961
PYGL	8.96134	-1.24678	9.02907	2.8817e-11	6.67048e-10	15.4236
ZNF540	-6.41189	-0.834908	-9.02885	2.88361e-11	6.67048e-10	15.4096
ZSCAN18	-7.49525	0.421966	-9.02185	2.94563e-11	6.80457e-10	15.4792
LOC102723824	-5.57092	0.132344	-9.01741	2.98568e-11	6.8876e-10	15.4074
LOC399715	-5.21766	-2.29192	-9.01361	3.02046e-11	6.95825e-10	15.2041
LINC01136	-4.92356	-0.969458	-9.01276	3.02827e-11	6.96668e-10	15.2949
MTX2	1.81098	5.45639	9.00916	3.06156e-11	7.03363e-10	15.5016
AHNAK2	-5.45855	-2.6151	-9.00434	3.10687e-11	7.12795e-10	15.1922
S100A14	6.92446	-3.25602	9.00264	3.12295e-11	7.15506e-10	15.1951
IGSF3	9.11941	1.93394	8.99967	3.15129e-11	7.18687e-10	15.4203
GNGT2	-6.60593	-0.588577	-8.99963	3.15167e-11	7.18687e-10	15.3413
LOC645177	-5.38455	-2.55194	-8.9994	3.15389e-11	7.18687e-10	15.1629
MARVELD2	6.38341	-0.581837	8.99939	3.15398e-11	7.18687e-10	15.262
DIXDC1	6.7517	0.302018	8.98538	3.29149e-11	7.49004e-10	15.3001
2006-09-01	-2.10348	7.68208	-8.98295	3.31588e-11	7.53532e-10	15.1692
PI16	-5.72825	-3.15326	-8.97943	3.35168e-11	7.60637e-10	15.0984
SPC24	5.68389	1.72588	8.97799	3.36644e-11	7.62953e-10	15.2954
GAS1	8.86871	-0.585209	8.97487	3.39858e-11	7.69199e-10	15.2919
ELOVL4	7.19834	-1.54305	8.96259	3.5282e-11	7.97459e-10	15.1195
SLC6A16	-5.20029	0.298383	-8.96043	3.55154e-11	8.01654e-10	15.2367
GINS2	4.63545	5.12249	8.95678	3.5912e-11	8.09517e-10	15.4094
MCM10	7.23416	3.50369	8.95453	3.61594e-11	8.13998e-10	15.3061
RALB	2.81514	7.45234	8.95104	3.65466e-11	8.21612e-10	15.152
ENO2	2.69649	5.84886	8.94313	3.74392e-11	8.40553e-10	15.3017
TNFRSF10D	-5.54136	-0.145795	-8.94165	3.76088e-11	8.43232e-10	15.1958
TBC1D4	7.16355	4.44808	8.94082	3.77036e-11	8.44229e-10	15.3165
MSC	9.07314	3.5629	8.93997	3.78022e-11	8.45308e-10	15.2626
GLIPR1	-3.57586	4.75877	-8.93343	3.85638e-11	8.6119e-10	15.3122
BZW2	1.65362	7.08336	8.93231	3.86965e-11	8.63004e-10	15.0951
ZNF606	-6.24822	0.152052	-8.93057	3.89022e-11	8.66438e-10	15.173
NCAPG	4.97081	3.99273	8.92904	3.90847e-11	8.6935e-10	15.2895
CENPA	7.36518	1.55258	8.91284	4.10664e-11	9.12218e-10	15.135
B3GNT7	-6.10329	-2.60747	-8.91135	4.12544e-11	9.15181e-10	14.9676
RDH10	6.75986	2.7692	8.90847	4.16187e-11	9.22044e-10	15.1502
FEN1	2.93961	6.38094	8.90227	4.24142e-11	9.38429e-10	15.1426
MYO7B	-8.56431	-1.37924	-8.90087	4.25962e-11	9.41213e-10	15.0989
TUBA1B	2.14008	10.2447	8.89307	4.36237e-11	9.6265e-10	14.7109
GPR153	7.65853	-1.7293	8.88946	4.41075e-11	9.72046e-10	14.9575
CCDC69	-5.23166	3.53677	-8.88761	4.4358e-11	9.76283e-10	15.2029
CDK14	-5.53953	2.81708	-8.88662	4.44923e-11	9.77955e-10	15.1543
ABI3	-7.36141	1.34012	-8.88445	4.47894e-11	9.83197e-10	15.101
RABGEF1	-1.36283	5.62356	-8.87628	4.59219e-11	1.00674e-09	15.0525
BHLHE22	7.49006	-2.58536	8.87071	4.67111e-11	1.0227e-09	14.8748
IL1R2	9.52367	4.2224	8.86822	4.7069e-11	1.0292e-09	15.0582
BTG1	-2.44238	8.47646	-8.85887	4.84348e-11	1.05768e-09	14.7114
LOC441204	-5.43027	-2.72061	-8.85019	4.97395e-11	1.08476e-09	14.7297
SDK2	-6.3495	0.514846	-8.84868	4.99701e-11	1.08771e-09	14.9588
SSH2	-3.25384	5.1875	-8.84845	5.00043e-11	1.08771e-09	15.0451
HLF	6.9131	-2.16182	8.84447	5.06178e-11	1.09962e-09	14.7697
RP9P	-5.52151	-0.127841	-8.84117	5.11327e-11	1.10938e-09	14.872
CCT3	1.37844	8.89532	8.84063	5.12174e-11	1.10978e-09	14.653
LOC101926948	-5.65382	-1.55909	-8.8388	5.15042e-11	1.11455e-09	14.7943
PCLAF	4.99091	5.16726	8.83576	5.19863e-11	1.12353e-09	15.0476
FOLR2	-5.88526	-2.31472	-8.83402	5.22652e-11	1.12811e-09	14.7654
PHLDA3	7.40293	0.0934006	8.83184	5.26154e-11	1.13421e-09	14.8866
AIFM1	1.9451	5.7892	8.82208	5.42124e-11	1.16713e-09	14.9096
IL18BP	-5.25494	2.16688	-8.81672	5.51101e-11	1.18494e-09	14.917
GRASP	-7.53175	-0.777554	-8.81242	5.58418e-11	1.19913e-09	14.8337
C4orf46	3.40651	5.25288	8.8111	5.60692e-11	1.20248e-09	14.9612
SLC37A2	-6.3504	-1.60445	-8.80715	5.67524e-11	1.21496e-09	14.706
DIRAS1	-5.72787	-3.36263	-8.8069	5.67964e-11	1.21496e-09	14.6098
PWWP2B	-6.31419	-1.9534	-8.80493	5.71389e-11	1.22073e-09	14.6882
FKBP10	7.72459	-0.621947	8.79942	5.81136e-11	1.23998e-09	14.728
CYFIP2	-3.37378	7.00223	-8.79862	5.82572e-11	1.24146e-09	14.7159
FAM53B-AS1	-5.28581	-2.94776	-8.7947	5.89619e-11	1.25489e-09	14.571
UBE2C	6.28531	4.62438	8.7919	5.94706e-11	1.26411e-09	14.8965
VENTX	-4.63786	-4.1934	-8.78984	5.98474e-11	1.27051e-09	14.5093
ZNF439	-6.58987	-0.0183101	-8.78525	6.06959e-11	1.28689e-09	14.7757
SCPEP1	-1.75419	5.94681	-8.77472	6.26918e-11	1.32753e-09	14.6974
TMC8	-5.94512	3.59052	-8.77228	6.31618e-11	1.3358e-09	14.8585
DENND5B	-5.81945	3.06365	-8.76984	6.36365e-11	1.34414e-09	14.8257
DTL	4.67053	4.29984	8.76902	6.37979e-11	1.34585e-09	14.8321
MELK	7.32748	3.52552	8.76437	6.47152e-11	1.36239e-09	14.75
PRKAG2	-6.19261	1.25407	-8.76423	6.47441e-11	1.36239e-09	14.7135
PSMD11	1.52606	8.16325	8.75779	6.6037e-11	1.38785e-09	14.4638
PSMD1	1.15986	7.22682	8.7557	6.64623e-11	1.39504e-09	14.5495
TLCD1	6.14027	-0.472731	8.75406	6.67986e-11	1.40035e-09	14.561
STK38L	3.3844	5.79933	8.75248	6.71235e-11	1.4054e-09	14.7313
SLC2A9	7.62295	-0.38674	8.74866	6.79166e-11	1.42024e-09	14.651
MIR4539	-5.36193	-3.58235	-8.74761	6.81364e-11	1.42306e-09	14.4218
ZNF415	-6.39217	-1.17764	-8.74332	6.90416e-11	1.44017e-09	14.5895
CD74	-1.8285	12.8687	-8.73988	6.97758e-11	1.45368e-09	13.9511
RAB13	5.389	3.98466	8.73831	7.01121e-11	1.45887e-09	14.7385
CYP27B1	6.27213	-0.0383643	8.73645	7.05154e-11	1.46445e-09	14.5499
CCDC103	5.57457	0.246115	8.73626	7.05548e-11	1.46445e-09	14.543
HSF4	6.74321	-0.517795	8.73353	7.11516e-11	1.47501e-09	14.5378
PAICS	2.47859	7.25961	8.73037	7.18448e-11	1.48754e-09	14.5186
GIT2	-1.57856	6.74495	-8.72733	7.25198e-11	1.49967e-09	14.4807
TMEM92-AS1	7.30149	-2.77255	8.72181	7.37635e-11	1.52262e-09	14.4248
SYNJ2	-4.87651	1.4964	-8.7213	7.38783e-11	1.52262e-09	14.5978
B9D1	6.02674	1.28203	8.72081	7.39893e-11	1.52262e-09	14.5563
CCT2	1.56885	8.45215	8.7208	7.39929e-11	1.52262e-09	14.3261
FBXL5	-1.83759	5.83278	-8.72034	7.40983e-11	1.52292e-09	14.5612
MIR320E	-4.78504	-2.13552	-8.71876	7.44594e-11	1.52847e-09	14.3749
ARHGAP15	-3.64069	6.85482	-8.71814	7.46009e-11	1.5295e-09	14.4777
FXYD7	-5.79943	-2.16185	-8.71648	7.49828e-11	1.53545e-09	14.4166
GRAP	-8.36985	0.779145	-8.71487	7.53554e-11	1.5412e-09	14.6007
CLCN6	-2.3144	4.1115	-8.71376	7.56126e-11	1.54458e-09	14.6765
ITPKB-IT1	-5.02285	-0.851664	-8.71007	7.64756e-11	1.56031e-09	14.4561
ZNF137P	-5.68124	-2.02766	-8.70784	7.70046e-11	1.56919e-09	14.401
ZNF525	-5.5101	0.329423	-8.70726	7.71403e-11	1.57005e-09	14.5393
CHL1	-6.80563	-1.3307	-8.70278	7.82126e-11	1.58994e-09	14.481
LINC00954	-5.54275	-0.920498	-8.70094	7.86568e-11	1.59704e-09	14.4163
VDR	7.34249	2.97517	8.69002	8.13484e-11	1.64969e-09	14.5221
KCNH8	-5.86728	-0.200863	-8.68543	8.25058e-11	1.67114e-09	14.46
CEP55	5.76302	3.78212	8.68056	8.37533e-11	1.69436e-09	14.5376
RCSD1	-6.0344	4.04786	-8.67883	8.42023e-11	1.70102e-09	14.5749
CHD2	-1.89424	7.35279	-8.6783	8.4339e-11	1.70102e-09	14.2468
TFG	1.82182	7.02051	8.67812	8.43865e-11	1.70102e-09	14.3257
NKILA	-5.25526	-3.90101	-8.67664	8.47725e-11	1.70675e-09	14.2102
CDK2	2.40001	5.72681	8.6757	8.50168e-11	1.70961e-09	14.487
PSMA6	1.78533	8.03892	8.67476	8.52641e-11	1.71253e-09	14.2158
LOC101928697	8.31139	0.571061	8.67167	8.60795e-11	1.72684e-09	14.4417
RCAN3	-4.78565	1.79766	-8.66979	8.65807e-11	1.73482e-09	14.4456
C12orf42	-5.68739	0.919853	-8.65718	9.00124e-11	1.80143e-09	14.4301
ARL11	-7.26538	0.687487	-8.65304	9.11707e-11	1.82244e-09	14.4108
LDHB	2.3453	9.95827	8.65208	9.14413e-11	1.82567e-09	14.0047
MAP3K1	-6.28643	4.31582	-8.64822	9.25368e-11	1.84369e-09	14.4805
CHMP7	-2.38308	5.5492	-8.64812	9.25639e-11	1.84369e-09	14.3809
ATP2A3	-6.62695	3.92457	-8.64624	9.31021e-11	1.85221e-09	14.4776
TNFRSF11A	9.06823	0.0920473	8.64558	9.32932e-11	1.85382e-09	14.3595
HEBP1	-6.19201	-0.136011	-8.64443	9.36259e-11	1.85822e-09	14.2803
ZCCHC11	-2.37819	6.00435	-8.64196	9.43419e-11	1.87022e-09	14.3185
SLC35B1	1.55899	5.79856	8.64066	9.47205e-11	1.87551e-09	14.3363
RAB34	-6.88102	-0.123014	-8.63968	9.50082e-11	1.87899e-09	14.3056
SECISBP2	-1.74849	5.70895	-8.63747	9.56561e-11	1.88957e-09	14.3096
ZNF257	-6.74192	-0.965843	-8.63399	9.66901e-11	1.90775e-09	14.2666
ZCCHC18	-6.10136	0.575982	-8.62793	9.85155e-11	1.94148e-09	14.2796
PPP1R16B	-5.12522	3.73708	-8.62367	9.98197e-11	1.96488e-09	14.4119
PTPRG	7.20157	1.81439	8.62308	1.00003e-10	1.96617e-09	14.3113
UBA7	-3.72664	6.07018	-8.61993	1.00981e-10	1.98309e-09	14.2467
BMS1P20	-2.18412	6.21016	-8.61701	1.01894e-10	1.99868e-09	14.1969
GPR65	-6.02656	2.76436	-8.61324	1.03089e-10	2.01975e-09	14.3482
CTPS1	1.66897	5.76388	8.6108	1.03867e-10	2.03263e-09	14.2685
FAM78B	8.27577	1.20387	8.60931	1.04349e-10	2.03967e-09	14.2706
DENND4B	-2.03787	5.75446	-8.608	1.04773e-10	2.04558e-09	14.2248
INSM1	7.65008	-2.80616	8.60716	1.05044e-10	2.04848e-09	14.1276
PERP	8.11721	2.31243	8.60555	1.05568e-10	2.05631e-09	14.2714
SLC38A11	-7.76889	-1.98205	-8.60353	1.06228e-10	2.06676e-09	14.2086
AARD	7.32982	-1.19427	8.5978	1.08128e-10	2.10129e-09	14.1264
OSCP1	5.61433	0.141375	8.5942	1.09338e-10	2.12234e-09	14.1375
BTN3A2	-2.55869	5.99683	-8.59244	1.09935e-10	2.13147e-09	14.1592
CTSS	-2.15975	7.59136	-8.58322	1.13113e-10	2.19055e-09	13.9457
CREBRF	-2.49925	5.5495	-8.57842	1.14805e-10	2.22075e-09	14.1504
CXXC5	-7.13269	2.52844	-8.57757	1.15108e-10	2.22405e-09	14.2357
SHCBP1	4.92847	3.3364	8.57553	1.15834e-10	2.23298e-09	14.2279
CLEC4A	-4.76421	1.70401	-8.57553	1.15836e-10	2.23298e-09	14.1954
MCM4	3.42505	5.51202	8.5745	1.16205e-10	2.23751e-09	14.2391
FGF2	6.5864	-0.251129	8.57173	1.17204e-10	2.25417e-09	14.0613
USP28	-2.45608	4.43544	-8.5688	1.18271e-10	2.27208e-09	14.2329
CXorf21	-5.68117	2.722	-8.56461	1.19818e-10	2.29916e-09	14.1932
AK4	5.86982	2.10669	8.55579	1.23134e-10	2.35835e-09	14.091
CCT6A	1.38238	8.04125	8.55566	1.23184e-10	2.35835e-09	13.861
ZNF471	-6.26457	-2.22738	-8.55297	1.24214e-10	2.37536e-09	13.9766
ZNF274	-1.82629	5.23804	-8.55176	1.24677e-10	2.38063e-09	14.0877
LILRA4	-5.64944	-0.149335	-8.55151	1.24773e-10	2.38063e-09	14.0731
OSBPL6	7.48172	0.122932	8.5503	1.25242e-10	2.38685e-09	14.0496
SNORD56B	-4.71075	-3.64045	-8.54969	1.25481e-10	2.3887e-09	13.8442
CTC1	-2.01644	5.19313	-8.54442	1.27547e-10	2.42527e-09	14.0841
SHROOM1	7.49373	-0.619986	8.54338	1.27955e-10	2.42776e-09	14.0157
PSMA5	1.64873	7.75142	8.54335	1.27967e-10	2.42776e-09	13.8392
RAD51AP1	2.49292	5.02307	8.53942	1.29535e-10	2.45473e-09	14.1303
MRPL3	1.67515	6.83112	8.53577	1.31007e-10	2.47983e-09	13.9165
CHD7	-1.95589	6.68616	-8.53183	1.32617e-10	2.50747e-09	13.8763
ZNF321P	-4.33292	-3.04973	-8.52426	1.35767e-10	2.56414e-09	13.7742
PLK1	3.87064	4.53054	8.51523	1.3962e-10	2.63117e-09	14.0854
KCNQ1	-7.48324	-1.96384	-8.5152	1.39631e-10	2.63117e-09	13.8883
FOXM1	4.17722	3.34902	8.50998	1.41911e-10	2.67115e-09	14.0375
HCG23	-5.56942	-1.54287	-8.50761	1.42957e-10	2.68782e-09	13.8326
DOK3	-7.34308	3.06754	-8.49884	1.46901e-10	2.75557e-09	14.0098
MIR600HG	-5.40392	0.704443	-8.49867	1.46977e-10	2.75557e-09	13.9003
LOC100652768	-4.74049	-1.39652	-8.4985	1.47054e-10	2.75557e-09	13.7814
TANC1	5.92194	-0.437096	8.4953	1.48523e-10	2.78e-09	13.818
FLJ41278	8.10812	-1.86583	8.4904	1.50798e-10	2.81944e-09	13.8625
TIPRL	1.55104	6.51566	8.48509	1.53301e-10	2.86304e-09	13.7862
UTRN	-6.02203	5.21427	-8.48399	1.53827e-10	2.86967e-09	13.9847
STIM2	-1.79956	5.36087	-8.47507	1.58145e-10	2.94428e-09	13.841
JPH4	8.10849	0.757183	8.47501	1.58178e-10	2.94428e-09	13.8722
KLHL14	-6.81707	0.813175	-8.47088	1.60219e-10	2.97896e-09	13.8667
NME1	2.4776	6.0135	8.4652	1.63069e-10	3.0286e-09	13.8107
ST7	4.98428	3.28812	8.46375	1.63806e-10	3.03893e-09	13.8882
TSN	1.79909	7.5578	8.46131	1.65053e-10	3.05868e-09	13.606
DDX60L	-6.35261	2.09392	-8.4585	1.66499e-10	3.08207e-09	13.8638
MNX1-AS1	6.69033	-1.97972	8.45186	1.69966e-10	3.14277e-09	13.6394
SLC17A9	-8.24543	0.210794	-8.4491	1.71432e-10	3.1664e-09	13.8165
ARID5B	-4.32079	6.48688	-8.44675	1.72686e-10	3.18605e-09	13.7017
MKS1	2.32237	4.05408	8.44264	1.7491e-10	3.22353e-09	13.8633
FH	1.78171	6.53285	8.43966	1.76535e-10	3.24992e-09	13.6526
PNPLA7	-5.30173	2.10869	-8.43713	1.77933e-10	3.27205e-09	13.8081
FZD7	5.90478	-0.695698	8.43341	1.8e-10	3.30643e-09	13.618
LTBP1	7.50379	-0.112259	8.41876	1.8839e-10	3.45677e-09	13.6767
OTUD7B	5.50791	0.488194	8.41504	1.90585e-10	3.49322e-09	13.6119
ACTL6A	1.71047	6.55177	8.41186	1.9248e-10	3.52412e-09	13.5712
MRPL19	1.72543	5.96013	8.41079	1.93119e-10	3.53196e-09	13.6233
MSL3	-1.83807	5.70671	-8.40951	1.9389e-10	3.54219e-09	13.6208
ZNF829	-6.29137	-0.382706	-8.40645	1.95747e-10	3.57222e-09	13.6285
HYOU1	2.70379	5.60578	8.40573	1.96188e-10	3.57637e-09	13.6884
NLRC5	-2.01184	5.94415	-8.39762	2.01201e-10	3.66379e-09	13.5311
CCT4	1.8221	8.47148	8.39564	2.02449e-10	3.68041e-09	13.3212
IQSEC1	-5.42778	3.74942	-8.39547	2.02553e-10	3.68041e-09	13.7227
PPID	1.76937	6.73718	8.38835	2.07096e-10	3.75888e-09	13.468
ZNF626	-6.47573	0.752858	-8.3824	2.10968e-10	3.82502e-09	13.6007
ZNF320	-6.40052	-0.0435818	-8.38194	2.11274e-10	3.82642e-09	13.5798
ZNF610	-5.83468	-1.32199	-8.38052	2.1221e-10	3.83925e-09	13.5057
CHRNA6	8.26682	0.64341	8.37914	2.13125e-10	3.84965e-09	13.5793
ST20	2.99408	2.6056	8.37896	2.13244e-10	3.84965e-09	13.6393
PHACTR1	-5.40421	2.60278	-8.3769	2.14616e-10	3.87023e-09	13.6487
ANXA2	2.70995	6.90486	8.37166	2.18151e-10	3.92976e-09	13.411
FCER2	-8.43171	3.78779	-8.36596	2.22054e-10	3.99579e-09	13.6281
C6orf201	-5.60723	-2.43035	-8.36428	2.23221e-10	4.01247e-09	13.3695
CDC6	5.6036	3.84901	8.36205	2.24778e-10	4.03614e-09	13.5973
LHPP	-5.14709	2.47595	-8.3605	2.25871e-10	4.04953e-09	13.5935
MEF2C	-5.70602	6.64724	-8.3603	2.26007e-10	4.04953e-09	13.4642
ILF2	1.24245	8.90545	8.35731	2.28129e-10	4.08319e-09	13.148
PLPP5	-1.84592	6.61578	-8.3567	2.28562e-10	4.08658e-09	13.3138
TFAP2A	5.02232	-2.55763	8.35349	2.30859e-10	4.12018e-09	13.2966
ZNF571	-6.03384	-0.118428	-8.35339	2.30932e-10	4.12018e-09	13.48
PSMD12	1.96511	6.90474	8.35278	2.31372e-10	4.12364e-09	13.3409
PART1	-5.25062	-2.47716	-8.33137	2.47352e-10	4.40375e-09	13.2567
SLC26A10	6.04413	-2.23023	8.32755	2.50318e-10	4.44858e-09	13.2461
BCAT1	4.92378	5.97928	8.32744	2.504e-10	4.44858e-09	13.4947
HLA-E	-2.736	9.45348	-8.32606	2.51485e-10	4.46313e-09	12.959
VCAM1	9.7614	1.36226	8.3218	2.54853e-10	4.51812e-09	13.4414
HIF1A	-1.88499	7.08452	-8.32018	2.56146e-10	4.53625e-09	13.1816
ANXA2P2	2.68288	6.06818	8.31967	2.56553e-10	4.53867e-09	13.3442
RTN2	5.82141	1.35063	8.31735	2.58419e-10	4.56685e-09	13.3999
PSMA3	1.46122	7.73786	8.31165	2.63058e-10	4.64394e-09	13.1201
CNFN	-5.41696	-0.754197	-8.30467	2.68852e-10	4.74123e-09	13.2867
ANKRD12	-2.47386	7.5164	-8.30431	2.69153e-10	4.74156e-09	13.0961
TRERF1	5.08748	2.93001	8.30148	2.71548e-10	4.77873e-09	13.3895
CPSF3	2.37797	6.96529	8.2982	2.74339e-10	4.82279e-09	13.1823
SLC35E2B	-1.86154	4.30206	-8.29579	2.76417e-10	4.85423e-09	13.395
TSPAN15	8.6117	0.0316142	8.28345	2.8728e-10	5.03973e-09	13.294
MAJIN	-5.43567	-2.40402	-8.28146	2.89075e-10	5.0659e-09	13.1491
RASGEF1B	-7.42879	2.36886	-8.27883	2.91464e-10	5.10245e-09	13.3269
ZNF568	-6.40898	-0.00766837	-8.27364	2.96233e-10	5.18053e-09	13.2627
SARAF	-2.47946	7.56102	-8.27265	2.97143e-10	5.19103e-09	12.9901
APOL1	3.22492	5.49871	8.26903	3.00525e-10	5.24465e-09	13.2627
KLK2	-4.91895	-3.60284	-8.26544	3.0392e-10	5.29388e-09	13.0378
HOXA6	5.22264	-3.55319	8.26538	3.03978e-10	5.29388e-09	13.0389
NT5C3A	-2.15652	6.11307	-8.25956	3.09565e-10	5.3856e-09	13.1014
EBLN3P	-2.02077	6.75098	-8.25784	3.11232e-10	5.40898e-09	13.0325
AMFR	-1.84408	5.44469	-8.25512	3.13892e-10	5.44957e-09	13.169
MEIS1	8.62868	0.32468	8.25234	3.16634e-10	5.49149e-09	13.2154
COL9A3	-7.47027	-1.68133	-8.25181	3.17158e-10	5.4949e-09	13.1474
LOC81691	5.6219	1.23285	8.24347	3.25545e-10	5.63438e-09	13.1404
CCNT2-AS1	-5.13397	-1.6197	-8.24075	3.28329e-10	5.6767e-09	13.0312
KIAA0040	-3.52159	4.79351	-8.23961	3.295e-10	5.69109e-09	13.169
ASPM	5.98777	3.73777	8.23749	3.31703e-10	5.72324e-09	13.212
NCKAP1	7.30538	-0.607691	8.23439	3.34929e-10	5.77297e-09	13.0903
TMEM243	-2.46516	6.25104	-8.23386	3.35491e-10	5.77672e-09	13.0201
LOC254896	5.73369	-2.9289	8.22639	3.4343e-10	5.90734e-09	12.9467
MEIS2	7.47286	-0.548172	8.22506	3.44858e-10	5.92584e-09	13.0713
GAD1	7.11313	-0.43534	8.223	3.471e-10	5.95825e-09	13.0608
TSC22D3	-4.96209	7.00211	-8.22207	3.48105e-10	5.9641e-09	12.9585
PSMC3IP	3.27244	2.60722	8.22172	3.48486e-10	5.9641e-09	13.155
CDC20	5.86369	4.02341	8.2217	3.48508e-10	5.9641e-09	13.1818
BACH2	-3.82785	3.76659	-8.2211	3.49164e-10	5.96924e-09	13.1755
LOC101929427	8.86283	-0.614943	8.21738	3.53258e-10	6.03309e-09	13.1006
QPCT	-6.11121	-0.748763	-8.21669	3.54027e-10	6.04008e-09	13.0653
AURKB	5.70555	4.1496	8.21423	3.56757e-10	6.08047e-09	13.1634
ELF1	-3.1937	6.65832	-8.21388	3.57159e-10	6.08113e-09	12.9264
TBRG1	-1.67533	5.9494	-8.2118	3.59488e-10	6.11458e-09	12.97
MIOS	-2.09698	4.94742	-8.20614	3.65917e-10	6.21763e-09	13.0612
EME1	3.34257	2.65165	8.20558	3.66565e-10	6.22233e-09	13.1016
CENPE	3.98963	4.77415	8.20498	3.6725e-10	6.22765e-09	13.143
SLC20A1	2.66857	7.23864	8.20243	3.70197e-10	6.27129e-09	12.8405
RARS	2.15517	6.68782	8.20165	3.71109e-10	6.28039e-09	12.9138
ZNF486	-6.54739	-0.807639	-8.19926	3.73898e-10	6.32121e-09	13.011
FAM53B	-4.73938	2.92254	-8.1969	3.76676e-10	6.36176e-09	13.1112
VAV1	-2.24531	4.73065	-8.19417	3.79913e-10	6.4048e-09	13.0302
BTK	-6.07833	4.16821	-8.19411	3.79988e-10	6.4048e-09	13.1008
DOPEY2	-4.09756	3.66094	-8.18831	3.86959e-10	6.51576e-09	13.094
SPG20	-6.28383	2.35228	-8.1819	3.9481e-10	6.64128e-09	13.035
HSPD1	1.9055	9.02704	8.17409	4.04601e-10	6.79916e-09	12.5887
LINC01055	6.71451	-2.03685	8.17118	4.0832e-10	6.85479e-09	12.8672
FGD2	-4.37678	4.09618	-8.16677	4.14e-10	6.93486e-09	12.9912
UCK2	2.72079	4.92414	8.16672	4.14065e-10	6.93486e-09	12.9981
ZNF350	-6.00226	1.19806	-8.16652	4.1433e-10	6.93486e-09	12.9771
CAMK4	4.94716	4.07111	8.15905	4.24153e-10	7.0922e-09	12.9976
ZNF345	-6.32536	-0.0578945	-8.15752	4.26191e-10	7.11917e-09	12.8985
MTFR2	3.19879	3.55422	8.1561	4.281e-10	7.14395e-09	12.9903
LACTB2-AS1	-4.88906	-0.421186	-8.15357	4.31517e-10	7.19381e-09	12.8386
ZNF404	-6.18563	-1.06049	-8.15072	4.35386e-10	7.25111e-09	12.8502
NR2F2	7.96743	0.172092	8.14377	4.44996e-10	7.40038e-09	12.8774
ITSN1	5.97579	0.490383	8.1436	4.45232e-10	7.40038e-09	12.8275
MRPL51	1.59364	7.4433	8.14101	4.4887e-10	7.45346e-09	12.6177
FCGBP	-5.41619	-2.82793	-8.13906	4.51629e-10	7.49186e-09	12.6964
RNF19B	3.08058	4.53246	8.13723	4.54229e-10	7.52754e-09	12.9208
NOL3	7.00578	-1.22847	8.13346	4.5965e-10	7.60987e-09	12.7685
XAF1	-4.46684	5.96621	-8.13204	4.61701e-10	7.63628e-09	12.809
CLCN4	-5.62895	0.978916	-8.12938	4.65567e-10	7.6892e-09	12.8528
PSD4	-7.13263	2.60247	-8.12921	4.65818e-10	7.6892e-09	12.8777
LOC100507091	-4.98158	-3.63823	-8.12507	4.71916e-10	7.7822e-09	12.6386
LOC728989	-5.66178	-2.33611	-8.123	4.74993e-10	7.82525e-09	12.6872
ANGPTL1	-7.29659	-0.781679	-8.12178	4.76827e-10	7.84776e-09	12.812
LINC01353	-5.28204	-1.19027	-8.12101	4.77973e-10	7.85891e-09	12.7226
BIN1	-6.34872	3.16679	-8.11998	4.79534e-10	7.87686e-09	12.8817
CCNI	-1.62717	7.30335	-8.11899	4.81029e-10	7.89368e-09	12.538
ANKK1	-5.28596	-3.6158	-8.11718	4.83764e-10	7.9308e-09	12.6273
ONECUT2	7.69513	0.0782303	8.10818	4.97656e-10	8.15058e-09	12.7483
RRM1	1.67704	6.45771	8.10542	5.01978e-10	8.21334e-09	12.6375
HTRA4	-4.78623	-2.83212	-8.10132	5.08503e-10	8.31199e-09	12.5832
TUBG1	2.26602	5.65717	8.09654	5.16196e-10	8.42953e-09	12.7073
LINC00674	-2.98858	4.41776	-8.09283	5.22255e-10	8.52017e-09	12.7833
CELSR1	-4.57101	1.48789	-8.09059	5.25957e-10	8.57197e-09	12.7468
GCM1	-5.34457	-3.46431	-8.09029	5.26452e-10	8.57197e-09	12.546
CENPI	5.32082	1.28633	8.0886	5.29258e-10	8.60224e-09	12.6875
DNASE1L3	-6.44707	-0.830596	-8.08847	5.29471e-10	8.60224e-09	12.7028
CD84	-6.02301	2.80964	-8.08824	5.2985e-10	8.60224e-09	12.7855
ZNF83	-6.90134	2.39658	-8.08497	5.35336e-10	8.6829e-09	12.7565
PRKCE	-4.783	3.00919	-8.08415	5.3672e-10	8.69694e-09	12.7699
TYMSOS	5.07447	-1.85431	8.07813	5.46974e-10	8.85455e-09	12.5257
SH3BGRL3	-1.95075	8.55868	-8.07244	5.56862e-10	9.00592e-09	12.2516
C12orf75	4.26691	5.70467	8.07173	5.58111e-10	9.01742e-09	12.6775
VASP	-2.04052	5.36232	-8.07036	5.60528e-10	9.04775e-09	12.5897
PDE7A	-2.40184	5.88852	-8.06933	5.62344e-10	9.06834e-09	12.5385
FAM26F	-6.85584	1.53281	-8.06794	5.64805e-10	9.09928e-09	12.6872
RDM1	5.37597	-0.434032	8.06645	5.67469e-10	9.13342e-09	12.5455
KCNIP2	-5.20841	0.459054	-8.06434	5.71235e-10	9.18522e-09	12.6187
KIAA1551	-2.96817	7.13815	-8.06148	5.76403e-10	9.25945e-09	12.3798
EPHB1	7.86337	0.827803	8.05393	5.9028e-10	9.47329e-09	12.6184
C9orf66	-5.66272	-0.822809	-8.05165	5.94524e-10	9.53228e-09	12.553
DNAJB5	5.55911	1.91559	8.05072	5.96271e-10	9.55115e-09	12.6152
PIK3AP1	-5.17201	5.19674	-8.0499	5.97826e-10	9.56693e-09	12.622
LOC646626	-4.32272	-1.60898	-8.0472	6.02926e-10	9.63935e-09	12.4589
TTYH2	4.49145	1.59716	8.04396	6.091e-10	9.72878e-09	12.5722
LGALS9	-4.45363	3.55224	-8.0392	6.18321e-10	9.86667e-09	12.6387
SCAMP5	6.23424	-1.53689	8.02369	6.49295e-10	1.03511e-08	12.4052
ARHGAP24	-5.00098	3.96323	-8.02324	6.50208e-10	1.03558e-08	12.5812
CYP4Z2P	7.22294	-1.83473	8.02185	6.5307e-10	1.03915e-08	12.4318
SIGLEC5	-6.56747	-0.532988	-8.01951	6.57902e-10	1.04585e-08	12.4932
POLQ	4.43472	3.37988	8.0192	6.58553e-10	1.04589e-08	12.5654
RNF212	-5.31442	-3.02517	-8.01537	6.66534e-10	1.05756e-08	12.3457
CENPC	-1.62666	6.03897	-8.01443	6.68521e-10	1.05971e-08	12.3278
RIN3	-6.49086	1.13206	-8.01278	6.72003e-10	1.06423e-08	12.5007
SLC43A3	3.74778	5.99194	8.01168	6.7435e-10	1.06694e-08	12.4096
TRIM46	5.04191	-0.644889	8.0109	6.76013e-10	1.06856e-08	12.3755
OIP5	3.71027	3.04395	8.00897	6.80123e-10	1.07404e-08	12.5303
KIF21A	7.26051	1.89793	8.00712	6.84121e-10	1.07934e-08	12.4826
KLF8	-3.42589	2.9549	-8.00117	6.97083e-10	1.09876e-08	12.5216
ATP8B2	3.3216	4.63782	8.00018	6.9925e-10	1.10114e-08	12.5023
PIK3IP1	-6.06058	3.62242	-7.99559	7.09447e-10	1.11531e-08	12.505
POMP	1.54044	8.31843	7.99553	7.09581e-10	1.11531e-08	12.0493
EFCAB14	-1.33313	6.52456	-7.99497	7.10849e-10	1.11626e-08	12.2276
SYNGR1	-6.05258	-0.46136	-7.9932	7.14819e-10	1.12144e-08	12.4161
DIP2C	-5.6329	0.563409	-7.99127	7.19186e-10	1.12724e-08	12.4109
ORC6	2.40075	4.90942	7.98918	7.23957e-10	1.13366e-08	12.4245
POU6F1	-5.15629	0.811041	-7.98735	7.28145e-10	1.13915e-08	12.4105
KIF21B	-5.1423	1.78613	-7.9828	7.38666e-10	1.15454e-08	12.4247
IFI16	-1.74443	7.94942	-7.98193	7.40704e-10	1.15664e-08	12.0321
CADPS	7.75906	-2.00117	7.98115	7.42537e-10	1.15843e-08	12.3437
SEZ6L2	6.70222	-1.9988	7.98006	7.45094e-10	1.16134e-08	12.2847
DNAI2	5.92866	-3.46046	7.97473	7.57734e-10	1.17994e-08	12.2198
KCNK9	7.196	-1.61158	7.96544	7.80298e-10	1.21395e-08	12.279
KIF11	4.12992	4.13835	7.9638	7.84341e-10	1.21911e-08	12.4075
SLA	-3.79819	4.01014	-7.96236	7.87928e-10	1.22264e-08	12.3512
ARID4B	-1.43985	7.44272	-7.9623	7.88073e-10	1.22264e-08	12.0066
SH2D1A	7.19845	3.71732	7.95793	7.99013e-10	1.23847e-08	12.3642
FAM102A	-4.44404	3.30008	-7.95608	8.03698e-10	1.24458e-08	12.3844
SH3RF3	-6.59844	-2.68763	-7.95352	8.10222e-10	1.25353e-08	12.2149
BEND6	5.63867	-2.62992	7.95195	8.1425e-10	1.2586e-08	12.1519
EDARADD	2.5622	4.98582	7.94763	8.25458e-10	1.27475e-08	12.3057
PLAU	7.8491	0.193118	7.94474	8.33031e-10	1.28446e-08	12.2755
MUC1	5.98145	-1.70851	7.94464	8.3328e-10	1.28446e-08	12.1738
P4HA2-AS1	5.2292	-2.75306	7.94235	8.39345e-10	1.29262e-08	12.1174
PROSER2	7.09225	-2.19383	7.9388	8.4881e-10	1.306e-08	12.1895
AMPD3	-5.63267	2.70136	-7.93817	8.50495e-10	1.30739e-08	12.3168
FAXC	8.28363	-0.291583	7.93687	8.53988e-10	1.31156e-08	12.252
CLEC2B	-5.3967	3.95192	-7.93652	8.54933e-10	1.31181e-08	12.3226
SERPINA9	-6.72775	-2.59517	-7.93561	8.57418e-10	1.31442e-08	12.1787
NFE2L3	2.92577	4.07577	7.93522	8.58476e-10	1.31484e-08	12.317
OCLN	6.33434	0.787129	7.93439	8.6072e-10	1.31707e-08	12.2463
ARHGAP9	-6.56875	4.03159	-7.92945	8.74256e-10	1.33657e-08	12.3
CCNA2	4.38307	3.92977	7.924	8.89451e-10	1.35856e-08	12.2845
RPS27L	2.01925	7.25994	7.91752	9.07885e-10	1.38545e-08	11.9182
CYTH4	-5.46977	3.58791	-7.91361	9.19165e-10	1.40139e-08	12.2543
ATP5G3	1.72477	8.19301	7.91207	9.23652e-10	1.40695e-08	11.8199
ARID4A	-1.8239	6.51881	-7.90971	9.30597e-10	1.41625e-08	11.9575
MAPK12	7.35012	1.22432	7.90818	9.35108e-10	1.42182e-08	12.181
CARD16	-4.48023	3.85362	-7.90625	9.4084e-10	1.42924e-08	12.2287
PPT2	5.53272	-0.366326	7.90473	9.45378e-10	1.43484e-08	12.0837
TRAK1	-2.65	5.46091	-7.90228	9.52725e-10	1.44468e-08	12.0673
PLXNA3	-5.22658	0.578364	-7.90187	9.53962e-10	1.44525e-08	12.1207
MRPL46	2.23568	6.36665	7.89228	9.83363e-10	1.48845e-08	11.9356
MCF2L2	6.13933	-1.33196	7.88771	9.97685e-10	1.50876e-08	12.0115
FAM117A	-2.53739	3.96039	-7.88635	1.00198e-09	1.51338e-08	12.1518
PTGES3	1.13316	8.34385	7.88595	1.00327e-09	1.51338e-08	11.7291
CRNDE	6.94835	0.562148	7.88589	1.00345e-09	1.51338e-08	12.1028
ZNF793-AS1	-5.56239	-2.48402	-7.88201	1.01584e-09	1.5307e-08	11.9808
RASGRP3	-4.63603	4.43805	-7.88016	1.02181e-09	1.5383e-08	12.1296
PDGFRA	9.99715	1.85003	7.8724	1.04724e-09	1.57518e-08	12.0982
FOXA3	5.82346	-2.83127	7.87098	1.05195e-09	1.58085e-08	11.9135
LINC00886	-5.09794	-2.65155	-7.8706	1.05323e-09	1.58135e-08	11.9218
CCND2	3.45305	8.38009	7.86869	1.0596e-09	1.58949e-08	11.7337
LARGE2	-7.65171	0.816085	-7.8667	1.0663e-09	1.59812e-08	12.082
LBH	-4.82756	4.46566	-7.86302	1.07881e-09	1.61542e-08	12.0646
FAM72D	4.17574	0.708148	7.85954	1.09077e-09	1.63188e-08	11.9661
ZFP3	-5.59161	-1.23886	-7.8581	1.09578e-09	1.63791e-08	11.9736
ANKAR	-3.70299	2.46654	-7.85778	1.09686e-09	1.63807e-08	12.0716
GLI3	6.75565	-1.70035	7.85642	1.10163e-09	1.64273e-08	11.9227
DAZAP2	-1.51501	8.94112	-7.85633	1.10194e-09	1.64273e-08	11.5399
SNX9	-5.43168	2.54268	-7.85564	1.10436e-09	1.64486e-08	12.0701
DHRS9	-6.23201	-0.636691	-7.855	1.10657e-09	1.6467e-08	12.0011
NCF2	3.38417	5.03414	7.8516	1.11857e-09	1.66308e-08	11.9986
DMXL1	-2.48993	5.79336	-7.85117	1.1201e-09	1.66388e-08	11.8805
NDC80	3.33734	4.39787	7.84921	1.12707e-09	1.67275e-08	12.0495
LIMS2	-7.11491	-0.511423	-7.84857	1.12936e-09	1.67466e-08	11.9939
KCNN2	8.50979	-0.967051	7.84752	1.13313e-09	1.67877e-08	11.9847
ZAK	2.92247	4.98415	7.84258	1.15099e-09	1.70373e-08	11.9856
MAPRE2	-2.30363	6.90842	-7.8366	1.17303e-09	1.73483e-08	11.6936
SEC61G	1.6875	6.85235	7.83436	1.1814e-09	1.74566e-08	11.704
LRRC25	-6.24244	-3.04443	-7.83388	1.1832e-09	1.74678e-08	11.8446
TMIGD3	6.84228	-1.24945	7.83326	1.18552e-09	1.74867e-08	11.8773
WIPF1	-2.42973	6.49611	-7.81925	1.23939e-09	1.82653e-08	11.7154
ZNF763	-5.082	0.414728	-7.81801	1.24425e-09	1.83208e-08	11.8894
LOC102546229	7.37074	-2.09057	7.81288	1.26467e-09	1.86051e-08	11.8137
MTA3	1.79528	4.84366	7.81224	1.26725e-09	1.86144e-08	11.8745
FLJ27354	-4.97664	-0.78574	-7.81217	1.26752e-09	1.86144e-08	11.8045
LOC100132111	4.7582	-0.0500949	7.81022	1.2754e-09	1.87137e-08	11.8089
2009-09-01	-5.47075	4.31078	-7.80888	1.28085e-09	1.87773e-08	11.9242
PGD	1.94117	6.11342	7.80614	1.29204e-09	1.89087e-08	11.7355
GPRASP1	-6.0432	-0.109735	-7.80613	1.29208e-09	1.89087e-08	11.8677
ITPRIPL2	4.10746	2.29683	7.8052	1.29588e-09	1.89479e-08	11.8993
SRI	1.5754	7.57773	7.80486	1.29729e-09	1.89519e-08	11.5337
LINC00426	-5.82113	-0.126318	-7.80399	1.30088e-09	1.89878e-08	11.8543
PXYLP1	4.53562	2.09514	7.80169	1.31039e-09	1.911e-08	11.8608
PPCDC	2.85402	4.8282	7.80122	1.31236e-09	1.91222e-08	11.8562
FAM72A	3.66833	0.606125	7.80009	1.31705e-09	1.91739e-08	11.7728
TNFAIP6	7.7728	0.267068	7.79734	1.3286e-09	1.93251e-08	11.8384
PSMD10	1.77767	6.17352	7.7962	1.33343e-09	1.93786e-08	11.6808
ZNF717	-5.68217	-0.401281	-7.78806	1.36833e-09	1.98686e-08	11.7842
CDKL1	-4.83844	0.962016	-7.78648	1.37523e-09	1.99515e-08	11.7916
SRSF5	-1.22265	8.6743	-7.78561	1.37903e-09	1.99894e-08	11.334
TRIP13	5.39859	2.83538	7.78203	1.39479e-09	2.02004e-08	11.8215
TIPIN	2.23066	4.53514	7.77831	1.41136e-09	2.04227e-08	11.8046
TRANK1	-5.58988	3.33185	-7.7762	1.42086e-09	2.05425e-08	11.8313
EEF1D	-1.4445	8.87568	-7.7757	1.42309e-09	2.05537e-08	11.2906
IL27	9.39673	-1.33661	7.77548	1.42409e-09	2.05537e-08	11.7883
TRIM38	-1.7888	6.9263	-7.77408	1.43047e-09	2.0628e-08	11.4698
PTPN7	-4.35037	4.41721	-7.7735	1.43311e-09	2.06483e-08	11.7862
ALDH1B1	4.28734	3.83962	7.77286	1.43601e-09	2.06724e-08	11.8219
RPL26L1	2.22881	4.98097	7.77122	1.44352e-09	2.07627e-08	11.7351
EXOSC1	1.75034	6.32464	7.76474	1.47352e-09	2.1176e-08	11.5313
ZNF492	-5.27619	-2.55527	-7.76369	1.47847e-09	2.12289e-08	11.6143
CEP250	-1.79408	4.53498	-7.75674	1.51145e-09	2.1684e-08	11.689
SUSD3	-5.60048	1.57337	-7.75582	1.51589e-09	2.17291e-08	11.7534
PAK1	2.51316	5.36782	7.75465	1.52152e-09	2.17911e-08	11.6396
NTRK2	8.74807	0.034169	7.75372	1.52604e-09	2.18372e-08	11.7212
VBP1	1.59197	7.10422	7.75016	1.54341e-09	2.20669e-08	11.4208
TTK	5.50665	3.03399	7.74236	1.58214e-09	2.26015e-08	11.7027
HFM1	5.79394	-2.05685	7.74106	1.5887e-09	2.26739e-08	11.5663
GTF2IRD2B	-2.82333	1.46503	-7.74082	1.58992e-09	2.26739e-08	11.6908
PIK3CG	-6.96553	2.43358	-7.73681	1.61032e-09	2.29454e-08	11.697
CDCA7L	-3.87459	4.54662	-7.73565	1.61627e-09	2.30105e-08	11.6355
ZNF577	-5.72711	1.19333	-7.73356	1.62705e-09	2.31444e-08	11.6632
EZR-AS1	-4.38929	-2.5071	-7.73215	1.63435e-09	2.32285e-08	11.5084
CENPN	2.3139	4.98829	7.73057	1.64258e-09	2.33258e-08	11.6316
DENND5A	1.65606	6.15684	7.72442	1.67506e-09	2.37669e-08	11.4426
PPP1R32	-5.24835	-1.82728	-7.72293	1.68297e-09	2.38589e-08	11.5107
LGALS1	4.94731	7.32257	7.72232	1.68629e-09	2.38857e-08	11.4412
SYNE1	-4.51361	4.79637	-7.72191	1.68848e-09	2.38947e-08	11.6185
BCL7A	-5.74171	2.03622	-7.72167	1.68977e-09	2.38947e-08	11.6574
TGIF1	-5.68415	2.64068	-7.7206	1.69554e-09	2.3956e-08	11.6484
DCK	-1.73892	6.1891	-7.71956	1.70115e-09	2.40151e-08	11.4052
TREML3P	-4.51489	-3.91384	-7.71865	1.70604e-09	2.40563e-08	11.4457
LOC101927697	-4.92989	-3.51307	-7.71849	1.70693e-09	2.40563e-08	11.4605
MBNL3	-4.49349	3.66054	-7.71442	1.72917e-09	2.43492e-08	11.6415
PSMC2	1.37323	7.35444	7.71206	1.74219e-09	2.4512e-08	11.2641
FAM46C	-4.61619	5.48852	-7.7101	1.7531e-09	2.46448e-08	11.5283
PRELID2	-5.49377	-2.26108	-7.70932	1.75744e-09	2.46852e-08	11.4714
FCRL4	-6.56109	-2.41543	-7.70831	1.7631e-09	2.47439e-08	11.508
TMED2	1.31827	8.34579	7.70788	1.76553e-09	2.47573e-08	11.1506
APLP1	6.92219	0.0425599	7.70604	1.77589e-09	2.48818e-08	11.5414
LGALS17A	8.08136	-0.734708	7.70512	1.78112e-09	2.49209e-08	11.5405
MAGI3	4.77911	1.55819	7.70502	1.78166e-09	2.49209e-08	11.543
RAB31	-4.47195	2.73881	-7.70472	1.7834e-09	2.49245e-08	11.6078
ACKR1	7.32558	-1.80263	7.70328	1.79159e-09	2.50181e-08	11.5089
ZNF204P	-5.48835	-2.47288	-7.70017	1.80938e-09	2.52456e-08	11.4522
PPP4R4	6.51016	-1.9584	7.69795	1.82221e-09	2.54019e-08	11.4375
VPS25	1.33813	5.85132	7.69771	1.82362e-09	2.54019e-08	11.3746
DPCD	3.51396	2.96352	7.69534	1.8374e-09	2.55727e-08	11.5783
ANXA2R	-4.25846	3.08749	-7.69459	1.84184e-09	2.56132e-08	11.5804
LAMB3	8.98862	0.772122	7.69418	1.84422e-09	2.5625e-08	11.5465
CDCA7	4.95583	4.69587	7.69282	1.85226e-09	2.57154e-08	11.5726
LINC00460	7.8747	-1.71499	7.69216	1.85613e-09	2.57478e-08	11.4785
IGLL3P	-5.10972	-3.49311	-7.6911	1.86239e-09	2.58133e-08	11.3788
NFATC1	-5.72594	2.63875	-7.68958	1.87146e-09	2.59176e-08	11.5612
MRPL17	1.82844	5.69366	7.68796	1.88111e-09	2.60297e-08	11.397
TAGLN2	1.50297	9.85042	7.6876	1.88326e-09	2.60381e-08	10.9328
LINC01841	-4.521	-2.8555	-7.68586	1.89376e-09	2.61617e-08	11.3677
CD300A	-5.83891	-1.32773	-7.6847	1.90072e-09	2.62362e-08	11.4572
MORC3	-2.55672	6.01182	-7.67333	1.97084e-09	2.71721e-08	11.2923
MAML3	-5.43899	-2.18627	-7.67318	1.97177e-09	2.71721e-08	11.3518
SERPINB9P1	-5.41236	0.565578	-7.67242	1.97656e-09	2.72159e-08	11.4731
CSGALNACT1	-5.5522	0.852789	-7.66987	1.99267e-09	2.74151e-08	11.447
MB21D2	7.52312	0.0386303	7.66916	1.9972e-09	2.74549e-08	11.4446
PRKD3	-2.08944	5.86351	-7.6641	2.02966e-09	2.78783e-08	11.283
UMPS	1.66912	5.57884	7.66197	2.04343e-09	2.80233e-08	11.3041
RNF130	-5.97517	-0.169304	-7.66196	2.04355e-09	2.80233e-08	11.4283
TTLL6	7.33395	-1.14201	7.66083	2.05091e-09	2.81011e-08	11.375
MCM3	1.43265	7.69081	7.65927	2.06109e-09	2.82175e-08	11.0742
SYS1	-1.8222	5.86117	-7.65731	2.07406e-09	2.8372e-08	11.2305
CLEC4G	-5.47561	-3.57974	-7.65599	2.08278e-09	2.8468e-08	11.285
LINC01169	6.22078	-3.1636	7.65402	2.09586e-09	2.86235e-08	11.2977
TTC21A	-4.56387	2.11899	-7.65361	2.09863e-09	2.8638e-08	11.441
PDE7B	-5.33065	-0.257475	-7.64683	2.14448e-09	2.924e-08	11.3584
CCDC28B	3.02945	4.64475	7.64439	2.1612e-09	2.9444e-08	11.3878
CRTC3	-1.78111	4.58566	-7.64334	2.16846e-09	2.95189e-08	11.3345
MCPH1	-1.77662	5.26466	-7.64135	2.18227e-09	2.96828e-08	11.2625
KIF13A	-5.07999	-0.750991	-7.64042	2.18877e-09	2.9747e-08	11.3028
DGKA	-1.96171	6.08614	-7.63873	2.20058e-09	2.98833e-08	11.1433
ZNF808	-5.77908	-0.391647	-7.63403	2.23383e-09	3.03103e-08	11.3324
NGLY1	-1.2634	6.54215	-7.63151	2.25181e-09	3.05296e-08	11.066
CD59	2.79171	6.47223	7.62742	2.28139e-09	3.09056e-08	11.1317
PARVG	-5.17867	4.10023	-7.62666	2.28691e-09	3.09554e-08	11.3251
MRVI1-AS1	-5.16171	-1.67091	-7.62467	2.30145e-09	3.11271e-08	11.2489
S100Z	-5.45156	-3.23521	-7.62201	2.32107e-09	3.13672e-08	11.192
TRAIP	2.58384	3.78695	7.62167	2.32365e-09	3.13767e-08	11.3504
PCGF2	5.18261	-2.32758	7.62067	2.33104e-09	3.14513e-08	11.1773
FAHD2B	3.47036	3.66158	7.61983	2.33728e-09	3.15101e-08	11.3478
EBI3	3.7705	6.20874	7.616	2.366e-09	3.18716e-08	11.172
ZNF790	-5.29313	0.0493658	-7.6118	2.39793e-09	3.22758e-08	11.2597
ZNF429	-5.55854	2.807	-7.61087	2.40504e-09	3.23455e-08	11.3197
BMP2K	-2.62936	4.4087	-7.60107	2.48144e-09	3.33463e-08	11.2233
CNTRL	-2.23984	6.8455	-7.58596	2.60414e-09	3.49672e-08	10.9049
SKIDA1	5.4497	-1.8881	7.58506	2.6116e-09	3.50393e-08	11.0888
SF3B6	1.74182	7.64468	7.58473	2.6143e-09	3.50476e-08	10.8254
CSRP1	2.72227	5.904	7.58227	2.635e-09	3.52968e-08	11.065
GLRX3	1.4628	6.56577	7.57557	2.69196e-09	3.6031e-08	10.9075
GPR161	5.49868	0.591628	7.57409	2.70467e-09	3.61723e-08	11.1281
OSR2	8.32718	-1.02107	7.57249	2.71856e-09	3.6329e-08	11.1448
PRR11	4.63654	4.2518	7.57042	2.73659e-09	3.65409e-08	11.1973
GFPT1	2.77029	5.67953	7.56826	2.75553e-09	3.67645e-08	11.0543
ESAM	-6.33709	0.249162	-7.568	2.75783e-09	3.67659e-08	11.1412
ZBTB20	-4.24139	5.01959	-7.56516	2.78298e-09	3.70718e-08	11.077
MCM7	2.00026	7.92636	7.56451	2.78877e-09	3.71194e-08	10.7519
RHBDF2	-4.36601	3.90105	-7.56424	2.79118e-09	3.7122e-08	11.1591
NEUROG2	5.87774	-2.41167	7.56126	2.81787e-09	3.74472e-08	11.0141
FAM129A	3.40638	4.75568	7.55775	2.84964e-09	3.78395e-08	11.1337
L3HYPDH	-1.98441	4.85882	-7.55251	2.89772e-09	3.84476e-08	11.0251
PRMT5	1.58562	5.69686	7.55116	2.91028e-09	3.85836e-08	10.9469
ACP5	-5.78358	2.32247	-7.54994	2.92164e-09	3.87037e-08	11.1319
BRINP2	8.02696	-1.16514	7.54813	2.93857e-09	3.88971e-08	11.072
ITFG2	-1.48747	5.4728	-7.54149	3.00166e-09	3.9701e-08	10.8924
ZNF506	-3.82854	3.31592	-7.54077	3.00855e-09	3.97608e-08	11.1044
EIF1B-AS1	-4.21958	0.260676	-7.53613	3.0535e-09	4.0323e-08	11.0293
GOT1	1.53226	5.45989	7.5348	3.06654e-09	4.04634e-08	10.9256
NRIP1	-4.18786	3.36788	-7.53415	3.07287e-09	4.0515e-08	11.0804
TMEM14C	1.35105	6.47175	7.53218	3.09234e-09	4.07397e-08	10.7972
E2F8	6.93514	0.242489	7.52429	3.17132e-09	4.17475e-08	10.9936
ZNF541	6.76695	-1.97876	7.523	3.18446e-09	4.18875e-08	10.9391
MEF2C-AS1	-5.92521	1.10259	-7.51859	3.22964e-09	4.24486e-08	11.0139
CDC40	-2.03621	5.66041	-7.51734	3.24262e-09	4.25857e-08	10.8289
ARPC3	-1.0913	8.81161	-7.5046	3.37748e-09	4.42885e-08	10.4245
ANLN	6.53896	1.97601	7.50459	3.37756e-09	4.42885e-08	10.9601
CENPK	2.84207	5.20714	7.50334	3.3911e-09	4.44314e-08	10.8976
FAM117B	-4.49444	3.69596	-7.50213	3.40425e-09	4.45222e-08	10.9819
ATM	-4.42359	5.42113	-7.502	3.40576e-09	4.45222e-08	10.8999
PDCD5	2.1189	6.61194	7.50197	3.406e-09	4.45222e-08	10.6923
S100A2	6.04616	-2.22047	7.49937	3.43446e-09	4.48593e-08	10.847
PANK1	4.58122	1.06993	7.4963	3.46842e-09	4.52676e-08	10.9014
HMCN1	6.67025	-2.0277	7.49292	3.50613e-09	4.57242e-08	10.8444
RBX1	1.54842	7.55547	7.49186	3.51806e-09	4.58222e-08	10.5257
MIR155HG	3.1398	6.89373	7.49177	3.51911e-09	4.58222e-08	10.6638
SFXN4	2.20248	5.45699	7.4907	3.53109e-09	4.59425e-08	10.7955
KMO	-4.41788	4.12407	-7.48861	3.5548e-09	4.62152e-08	10.9051
TSPYL2	-2.34242	4.45265	-7.48811	3.56059e-09	4.62545e-08	10.8696
XYLT1	-5.12241	2.1617	-7.48414	3.60611e-09	4.68096e-08	10.9225
SNRPG	2.02394	7.2428	7.48017	3.65221e-09	4.73714e-08	10.5496
C1orf145	-4.56083	-3.07424	-7.47647	3.69566e-09	4.7898e-08	10.7456
LOC202181	-3.93228	1.88214	-7.47396	3.72553e-09	4.82478e-08	10.891
TPI1	1.60825	10.3578	7.47258	3.74201e-09	4.84238e-08	10.219
VNN2	-4.85637	3.08084	-7.4722	3.74661e-09	4.8446e-08	10.893
PSMC4	1.21234	7.85796	7.46859	3.79022e-09	4.89721e-08	10.4287
RPN1	1.38348	7.5908	7.46678	3.81219e-09	4.92105e-08	10.4532
ADAM23	7.00818	2.62531	7.46659	3.81454e-09	4.92105e-08	10.8615
WWC3	-2.45878	5.10511	-7.46511	3.83268e-09	4.94065e-08	10.7413
MTHFR	-3.85606	3.5664	-7.46409	3.84513e-09	4.9529e-08	10.863
SUCLG1	1.23989	6.90186	7.4627	3.86234e-09	4.97124e-08	10.5027
TAGLN	-4.41559	1.27643	-7.46047	3.89006e-09	5.00308e-08	10.8287
ICMT	3.62161	4.44841	7.4593	3.90464e-09	5.01799e-08	10.8359
P2RY14	-6.13377	0.162703	-7.45764	3.92551e-09	5.04094e-08	10.8158
ARF3	2.17639	5.99584	7.45568	3.95014e-09	5.06738e-08	10.6366
CTNNAL1	4.55128	2.47192	7.45553	3.95214e-09	5.06738e-08	10.8191
DHRS7	1.334	7.58667	7.4544	3.96647e-09	5.08186e-08	10.411
BCAS4	-3.80353	4.20699	-7.45382	3.97385e-09	5.08743e-08	10.7947
KIF3A	2.28403	4.96912	7.45314	3.98247e-09	5.09459e-08	10.7308
PCBD1	2.74945	4.47051	7.45112	4.00826e-09	5.12366e-08	10.796
DCAF12	4.87198	3.10312	7.44943	4.03007e-09	5.14762e-08	10.8152
COL19A1	-5.14983	3.77935	-7.4449	4.089e-09	5.21892e-08	10.7926
IGF2BP3	4.98498	2.86105	7.44465	4.0923e-09	5.21916e-08	10.8032
ZCWPW1	-3.4717	2.36596	-7.44215	4.12513e-09	5.25704e-08	10.8
DYNLL1	1.42434	7.91028	7.44183	4.12947e-09	5.25857e-08	10.3447
TUBB2B	7.21794	2.31674	7.43978	4.15664e-09	5.28915e-08	10.7805
GATS	-3.28014	1.91837	-7.43888	4.16867e-09	5.30044e-08	10.7816
P2RY10	-4.7741	4.23703	-7.43775	4.18384e-09	5.3157e-08	10.7287
IFT43	1.89431	5.34285	7.43563	4.21237e-09	5.34789e-08	10.6005
KDM5B	-3.95671	2.41276	-7.4346	4.2263e-09	5.36152e-08	10.7763
SLC27A2	7.9591	0.659032	7.43357	4.24017e-09	5.37505e-08	10.7393
SAP25	-4.40216	0.247241	-7.43215	4.25961e-09	5.39561e-08	10.7037
SPINK13	5.81034	-2.81216	7.42928	4.29891e-09	5.44128e-08	10.6164
LRRC63	6.66438	-1.45025	7.42558	4.35019e-09	5.50204e-08	10.6515
RNASEH2B-AS1	-4.34688	-2.68843	-7.42177	4.40374e-09	5.56557e-08	10.5827
NSDHL	1.6281	4.7663	7.41974	4.43248e-09	5.59767e-08	10.639
LINC00880	5.4531	-2.75722	7.41819	4.45448e-09	5.62123e-08	10.5796
TENM2	8.11265	0.985674	7.4142	4.51191e-09	5.68942e-08	10.6929
CD19	-9.46547	2.83294	-7.41304	4.5287e-09	5.70629e-08	10.7108
MYO6	6.31011	2.4118	7.40956	4.57959e-09	5.76609e-08	10.676
SAMD14	5.2716	-2.65883	7.40898	4.58805e-09	5.7724e-08	10.5475
VDAC3	1.40467	7.28707	7.40811	4.60083e-09	5.78414e-08	10.299
PIWIL4	5.70151	-0.0859088	7.40721	4.61425e-09	5.79667e-08	10.6203
IRAK2	-4.6162	2.10513	-7.40254	4.68377e-09	5.87961e-08	10.6696
TTN	-4.02019	5.7999	-7.39379	4.81723e-09	6.04261e-08	10.4781
ERICH2	5.90844	-2.13728	7.38616	4.93658e-09	6.1877e-08	10.4984
PNRC1	-2.7221	7.07616	-7.38587	4.9411e-09	6.18874e-08	10.2232
NAE1	1.3062	6.95053	7.38455	4.96216e-09	6.21048e-08	10.2636
KIAA1683	-5.61086	-0.109897	-7.3808	5.02221e-09	6.28095e-08	10.5716
MET	7.47566	0.459115	7.38006	5.03412e-09	6.29115e-08	10.5698
ZFHX2	4.38328	0.381147	7.37973	5.03947e-09	6.29315e-08	10.529
CNN2	-3.75725	6.39755	-7.37306	5.14849e-09	6.42451e-08	10.3058
SLC25A4	2.26457	5.07559	7.37246	5.15841e-09	6.43209e-08	10.4569
ZNF112	-5.50375	-3.54932	-7.37104	5.18197e-09	6.45667e-08	10.4436
NIN	-1.9472	6.51638	-7.37002	5.19907e-09	6.47317e-08	10.2547
KIAA0430	-3.0794	5.67922	-7.36765	5.23875e-09	6.51773e-08	10.3786
C17orf58	3.7374	2.73962	7.36673	5.2543e-09	6.53224e-08	10.561
WHAMMP2	4.54746	0.334151	7.3661	5.2649e-09	6.54056e-08	10.4893
SRD5A3	3.93843	3.2424	7.36371	5.30549e-09	6.58474e-08	10.5579
NUP37	1.6354	5.9917	7.36354	5.30831e-09	6.58474e-08	10.3197
TNNI2	-5.75802	-0.646851	-7.36294	5.31849e-09	6.59249e-08	10.5006
WRB	2.2749	4.66068	7.36026	5.36453e-09	6.6434e-08	10.4805
ITGB2-AS1	-5.99655	2.45228	-7.36009	5.36748e-09	6.6434e-08	10.5471
KCND3	6.26757	-3.49443	7.35838	5.39701e-09	6.67502e-08	10.4136
NCOR1	-1.46201	7.61954	-7.35624	5.43431e-09	6.71222e-08	10.0802
SPATA41	5.5152	-2.80383	7.35619	5.4351e-09	6.71222e-08	10.4029
PPP2R2B	8.71114	0.0262133	7.35586	5.44083e-09	6.71436e-08	10.4991
ICAM1	2.8149	7.28076	7.35214	5.50622e-09	6.79006e-08	10.1454
EXTL2	3.54684	4.2285	7.35157	5.51633e-09	6.79753e-08	10.5053
GGT3P	6.18187	-2.60235	7.35119	5.52317e-09	6.80096e-08	10.4076
HOXB9	6.21266	-1.79826	7.35056	5.53424e-09	6.80959e-08	10.3962
ISL1	7.05752	-2.7844	7.34848	5.57131e-09	6.85018e-08	10.4085
TLR1	-4.1457	3.65483	-7.34335	5.66398e-09	6.95561e-08	10.478
LOC102724596	-4.19098	-2.26043	-7.34327	5.66535e-09	6.95561e-08	10.3552
XK	6.47497	-1.23642	7.33961	5.73243e-09	7.03112e-08	10.4151
SFMBT1	-2.20634	4.04638	-7.33946	5.73524e-09	7.03112e-08	10.4357
BEX4	-5.01118	2.22132	-7.33921	5.73975e-09	7.03151e-08	10.4796
MOB3C	-5.14313	2.81883	-7.33419	5.83302e-09	7.14056e-08	10.4668
CACNA1A	-4.622	0.304201	-7.32936	5.92429e-09	7.247e-08	10.4047
NUMA1	-1.75391	5.19778	-7.3239	6.0292e-09	7.36575e-08	10.2594
AHCYL1	2.6048	7.40465	7.32385	6.03015e-09	7.36575e-08	10.0357
HOXB13	6.60891	-2.19345	7.32124	6.08097e-09	7.42241e-08	10.3195
CCDC18-AS1	-2.37886	5.97557	-7.31838	6.13707e-09	7.48544e-08	10.1555
PRKCA	5.58623	2.15231	7.31715	6.16144e-09	7.5097e-08	10.3849
FAM107B	-3.73103	5.48274	-7.31685	6.16733e-09	7.51142e-08	10.2708
PRKX	-3.81654	4.06355	-7.31169	6.27044e-09	7.63147e-08	10.3719
METTL1	2.05397	4.66353	7.31064	6.29168e-09	7.65176e-08	10.3
MTAP	-5.92983	1.16735	-7.30439	6.41954e-09	7.8016e-08	10.3579
TIMM23	1.40023	5.78973	7.30392	6.42919e-09	7.80767e-08	10.1396
LOC105370333	2.54899	1.72071	7.30326	6.44281e-09	7.81855e-08	10.3422
MME	-5.67717	-1.86598	-7.30158	6.47772e-09	7.85524e-08	10.2749
PTTG3P	4.05068	0.695704	7.30038	6.50279e-09	7.87994e-08	10.2905
TXNDC17	2.36259	6.14245	7.29812	6.55028e-09	7.93175e-08	10.1122
CCT7	1.62234	8.88673	7.29629	6.58886e-09	7.97271e-08	9.78022
MICAL2	7.97077	-0.513294	7.29169	6.68696e-09	8.08558e-08	10.295
GABBR1	-3.46984	3.50164	-7.29072	6.70793e-09	8.10011e-08	10.3232
IL12RB1	-4.69253	2.78771	-7.29069	6.70864e-09	8.10011e-08	10.3302
LINC01624	-4.95006	-3.5884	-7.29005	6.72243e-09	8.10444e-08	10.1877
ITGAL	-4.28693	4.01397	-7.28991	6.72536e-09	8.10444e-08	10.293
UHRF1	2.86818	4.34533	7.28985	6.72672e-09	8.10444e-08	10.3018
LINC01150	-4.46156	-4.18021	-7.28827	6.76103e-09	8.13993e-08	10.1742
MPHOSPH8	-1.62429	7.18164	-7.28405	6.85334e-09	8.24514e-08	9.88433
C15orf57	-1.68764	6.09348	-7.28128	6.91475e-09	8.31306e-08	9.98673
ARNT2	6.30254	-2.90113	7.28062	6.92939e-09	8.32469e-08	10.1901
CDK5R1	-4.3772	2.00545	-7.28026	6.93753e-09	8.32851e-08	10.2911
2011-09-01	2.34789	5.24844	7.2788	6.97023e-09	8.36178e-08	10.1884
PSRC1	6.57052	-0.1016	7.27666	7.01836e-09	8.41351e-08	10.2265
COL7A1	7.25273	-0.683025	7.27521	7.05117e-09	8.4468e-08	10.2264
DCLRE1C	-1.84416	6.47681	-7.26942	7.18377e-09	8.5995e-08	9.92998
TTC13	-1.8135	4.69404	-7.26807	7.215e-09	8.63072e-08	10.1405
GALNT6	-4.37031	3.75053	-7.26759	7.2261e-09	8.63784e-08	10.2463
CYGB	-4.30366	-4.02187	-7.26696	7.24074e-09	8.64918e-08	10.1096
DKC1	1.38497	7.14068	7.26505	7.28535e-09	8.69628e-08	9.86909
ZNF266	-2.08558	4.98735	-7.26476	7.29224e-09	8.69831e-08	10.0361
ELL2	3.35893	6.2891	7.26092	7.38286e-09	8.80014e-08	10.0196
SLC22A4	4.9079	0.606731	7.25754	7.46377e-09	8.89027e-08	10.1812
RASGRP2	-8.20802	2.35898	-7.25613	7.49756e-09	8.92417e-08	10.2232
RAB30	-3.28077	5.36038	-7.2553	7.51765e-09	8.94174e-08	10.0714
KLF2	-7.35292	2.57251	-7.25442	7.53893e-09	8.9607e-08	10.219
NANS	1.76324	5.51651	7.25277	7.57908e-09	9.00204e-08	9.99781
CETN2	1.39879	5.10687	7.25227	7.59142e-09	9.01031e-08	10.0535
LINC00303	5.45083	-3.2465	7.24925	7.6655e-09	9.0918e-08	10.0715
SLIRP	1.93473	6.9347	7.2411	7.8693e-09	9.32693e-08	9.80958
IGHV1OR15-1	-5.34636	1.53428	-7.23981	7.9021e-09	9.35919e-08	10.1717
AUNIP	5.87614	0.398654	7.23839	7.93831e-09	9.39544e-08	10.114
GOT2	1.96745	7.0405	7.23643	7.98862e-09	9.44832e-08	9.79115
XKRX	-4.9535	-3.02115	-7.23579	8.00511e-09	9.45739e-08	10.0414
CASP10	-5.0688	1.44855	-7.23569	8.00757e-09	9.45739e-08	10.1393
ADARB1	-3.49374	2.37034	-7.23384	8.05534e-09	9.50665e-08	10.1551
PTK2	-1.89511	4.97556	-7.23352	8.06374e-09	9.50665e-08	9.98384
SEC61A2	2.60776	4.33805	7.23342	8.06629e-09	9.50665e-08	10.1067
LINC00899	-4.50981	-2.83875	-7.22864	8.19149e-09	9.64743e-08	10.0103
PTPRF	6.79429	-1.35951	7.2282	8.20321e-09	9.65446e-08	10.0614
PGAM2	-3.74779	-0.140867	-7.22718	8.22999e-09	9.67919e-08	10.0706
P2RX7	-5.82742	1.35842	-7.22226	8.36148e-09	9.82694e-08	10.106
HEG1	-5.81276	0.469518	-7.21978	8.42872e-09	9.89902e-08	10.0808
SIGLECL1	8.15914	-1.47718	7.21728	8.49687e-09	9.96925e-08	10.0505
TYMS	6.11189	2.1545	7.21715	8.5004e-09	9.96925e-08	10.0874
CPB2	7.00086	-1.33655	7.21615	8.52789e-09	9.9945e-08	10.0434
ERP29	-1.11633	7.70821	-7.21532	8.55072e-09	1.00142e-07	9.60679
C12orf77	-4.63964	-3.5042	-7.21298	8.6153e-09	1.00752e-07	9.95529
XRCC2	4.49305	1.85971	7.21283	8.61941e-09	1.00752e-07	10.0622
TAPT1	-2.85624	3.65487	-7.21279	8.62074e-09	1.00752e-07	10.0651
ACAP2	-1.74987	6.19608	-7.21157	8.65453e-09	1.01076e-07	9.78119
PLCH2	-6.94136	-1.97593	-7.20949	8.71266e-09	1.01684e-07	10.0162
ZNF141	-5.1297	0.280162	-7.20284	8.90136e-09	1.03814e-07	10.0362
2008-03-01	-3.99543	3.16835	-7.20186	8.92976e-09	1.04073e-07	10.0534
RARA-AS1	-4.61657	-3.28104	-7.19766	9.05142e-09	1.05418e-07	9.91599
NFIB	7.95935	1.38407	7.19563	9.1107e-09	1.06034e-07	10.0239
LYSMD2	-2.93836	4.29291	-7.19483	9.13437e-09	1.06236e-07	9.97817
IFNG-AS1	-5.66506	-1.75569	-7.19448	9.14466e-09	1.06282e-07	9.96939
GDAP1L1	6.53293	-1.90134	7.19351	9.17329e-09	1.06541e-07	9.95536
MATN1-AS1	-4.47676	0.594027	-7.1929	9.19137e-09	1.06677e-07	10.0003
ZFP2	-6.08281	-2.44382	-7.19166	9.22813e-09	1.0703e-07	9.94546
LINC01504	-5.42854	-1.80557	-7.19103	9.24694e-09	1.07174e-07	9.94796
SATB2	6.37526	-1.36282	7.19026	9.26978e-09	1.07364e-07	9.93746
BHLHE40	2.39783	6.63991	7.18939	9.29576e-09	1.07591e-07	9.70503
PDIA5	4.30098	2.21993	7.18892	9.31001e-09	1.07682e-07	10.0094
GINS3	2.63622	3.4035	7.18836	9.32669e-09	1.078e-07	10.0107
MIR193BHG	4.88078	-2.96338	7.18403	9.45797e-09	1.09242e-07	9.87221
DYNC2LI1	2.96666	4.60669	7.18205	9.51835e-09	1.09864e-07	9.93683
TEAD2	-4.73958	-1.08958	-7.18043	9.56838e-09	1.10326e-07	9.91922
CDH8	7.96142	-1.41747	7.18032	9.57151e-09	1.10326e-07	9.94613
ZNF441	-5.94028	0.468798	-7.17769	9.65319e-09	1.11191e-07	9.96957
ARHGAP11A	4.03449	3.17328	7.17728	9.66596e-09	1.11261e-07	9.97805
UAP1	2.22149	5.03146	7.17546	9.72291e-09	1.1184e-07	9.86022
AKAP10	-1.62245	5.4086	-7.17008	9.89303e-09	1.13719e-07	9.74197
TICRR	7.0304	0.0117228	7.16264	1.01333e-08	1.16401e-07	9.89321
GLYATL1	-4.72024	-3.56094	-7.1615	1.01705e-08	1.16748e-07	9.80147
ZNF793	-5.14348	-0.901372	-7.15795	1.02876e-08	1.18011e-07	9.86611
CKS2	2.14238	7.02022	7.15315	1.04482e-08	1.19773e-07	9.53344
TH2LCRR	5.3933	-0.858231	7.15292	1.04559e-08	1.19779e-07	9.83834
PCCB	1.71308	5.64242	7.15154	1.05026e-08	1.20232e-07	9.6775
ENC1	-4.73393	0.434864	-7.15007	1.05527e-08	1.20722e-07	9.86864
PCSK7	-2.28078	5.24307	-7.14974	1.05639e-08	1.20768e-07	9.69754
PTRH2	1.79628	5.48264	7.14689	1.06614e-08	1.218e-07	9.69005
BTN2A2	-1.88351	5.60203	-7.14631	1.06812e-08	1.21943e-07	9.6284
SP140	-1.82967	7.16263	-7.14423	1.07532e-08	1.22681e-07	9.43112
WDR37	-1.98976	3.69929	-7.14164	1.08435e-08	1.23627e-07	9.83573
ZMIZ1	-4.60116	2.60381	-7.14139	1.08524e-08	1.23645e-07	9.86826
HCG27	-3.60799	0.81978	-7.13762	1.09851e-08	1.25072e-07	9.82717
KIRREL2	7.13247	-0.81346	7.13721	1.09996e-08	1.25152e-07	9.80727
KNSTRN	2.5319	4.84055	7.13667	1.10187e-08	1.25284e-07	9.77774
WDR54	1.98319	5.89633	7.13558	1.10578e-08	1.25644e-07	9.60365
ERAL1	1.3116	6.54281	7.131	1.12224e-08	1.27307e-07	9.48344
STK17B	-3.21256	8.08165	-7.13089	1.12263e-08	1.27307e-07	9.34404
TUBA4A	-2.55368	5.37402	-7.13087	1.1227e-08	1.27307e-07	9.53575
SLC35G1	5.50689	0.379237	7.12917	1.12886e-08	1.2792e-07	9.77829
CLN8	-2.73381	3.42038	-7.12788	1.13357e-08	1.28367e-07	9.79643
ZNF503	5.9386	-3.40621	7.12657	1.13839e-08	1.28826e-07	9.71655
ZC3H12C	6.85085	-0.790025	7.12356	1.14951e-08	1.29996e-07	9.75395
ASF1B	4.26125	4.00949	7.12262	1.15298e-08	1.30301e-07	9.80209
NDUFS5	1.60474	7.51919	7.12035	1.16146e-08	1.31171e-07	9.35169
CCRL2	-5.39314	-0.546573	-7.11996	1.16292e-08	1.31248e-07	9.76319
TRPM2	-5.8767	-1.31078	-7.11884	1.16715e-08	1.31636e-07	9.74049
TNFSF14	6.5057	0.908286	7.11766	1.17159e-08	1.32048e-07	9.76404
POLE2	4.2974	2.97511	7.11724	1.17319e-08	1.3214e-07	9.79218
FANCI	3.41384	5.33441	7.11227	1.19216e-08	1.34186e-07	9.69598
B4GALT6	6.93394	0.688316	7.11201	1.19316e-08	1.34209e-07	9.75097
CDK13	-1.67239	6.12464	-7.11114	1.19654e-08	1.34498e-07	9.45214
BRCAT54	5.13545	-0.971853	7.11026	1.19991e-08	1.34787e-07	9.69091
HBP1	-2.30044	5.11887	-7.10873	1.20587e-08	1.35366e-07	9.58509
C14orf166	1.20722	7.96079	7.10834	1.20739e-08	1.35446e-07	9.25555
EED	1.83795	6.70295	7.10493	1.22075e-08	1.36852e-07	9.39703
ATP8B4	7.82062	-0.945519	7.10329	1.22725e-08	1.3749e-07	9.71382
ARHGEF18	-2.99838	4.0689	-7.10019	1.23959e-08	1.38779e-07	9.6825
TARS	1.48933	7.04668	7.09958	1.24205e-08	1.38948e-07	9.35134
TFDP2	2.2233	5.83475	7.0994	1.24275e-08	1.38948e-07	9.50791
NTRK3	8.41842	0.0982515	7.0989	1.24477e-08	1.39081e-07	9.72434
FKBP3	1.18341	7.07021	7.09791	1.24877e-08	1.39435e-07	9.31011
PSMB2	1.32722	7.71481	7.09468	1.26186e-08	1.40802e-07	9.24799
CWF19L2	-1.97598	5.23541	-7.09447	1.26269e-08	1.40802e-07	9.51959
FAM72B	5.11068	0.16504	7.09398	1.2647e-08	1.40932e-07	9.66577
ESCO2	5.00186	2.83945	7.09356	1.26642e-08	1.41031e-07	9.71516
PHF20	-1.80391	6.6428	-7.08786	1.28994e-08	1.43554e-07	9.31959
CNTNAP2	-7.1432	-0.82971	-7.08688	1.29405e-08	1.43916e-07	9.67579
BCL6	-3.60341	4.13451	-7.08247	1.31262e-08	1.45885e-07	9.63952
TMEM17	6.24847	-2.5989	7.08013	1.32256e-08	1.46891e-07	9.59612
WASHC4	-2.7426	6.82354	-7.07925	1.32633e-08	1.47213e-07	9.29796
HES1	-5.1525	1.54224	-7.0767	1.3373e-08	1.48332e-07	9.66013
BLK	-8.54287	2.29459	-7.0761	1.33992e-08	1.48525e-07	9.66495
YAP1	6.19003	-2.36078	7.07381	1.34985e-08	1.49527e-07	9.56783
RIC3	-4.56281	2.41906	-7.07275	1.35449e-08	1.49942e-07	9.64657
S1PR3	7.96683	-1.14565	7.07133	1.3607e-08	1.5053e-07	9.62311
ADCY10P1	-5.18016	0.230943	-7.06667	1.38137e-08	1.52716e-07	9.60454
DEK	1.26175	7.62082	7.0641	1.39286e-08	1.53811e-07	9.16328
ENG	-5.03167	-0.325566	-7.06405	1.39311e-08	1.53811e-07	9.58604
WSB2	1.81354	5.93647	7.0612	1.40598e-08	1.5513e-07	9.37497
LOC286437	-5.1292	0.201294	-7.05527	1.43319e-08	1.58027e-07	9.56159
STK10	-2.58026	5.41249	-7.05302	1.44368e-08	1.59079e-07	9.39779
MEF2A	-2.04479	5.51721	-7.05281	1.44465e-08	1.59082e-07	9.36466
ZNF165	-4.06248	3.11409	-7.05094	1.45341e-08	1.59942e-07	9.57777
CASQ1	6.25365	-0.573792	7.05013	1.45721e-08	1.60255e-07	9.5347
SH3RF1	-5.43341	-0.0700649	-7.04941	1.46062e-08	1.60525e-07	9.5453
TAF3	-1.34608	5.27285	-7.04765	1.46896e-08	1.61336e-07	9.35272
MIR6132	5.00292	-3.42165	7.04307	1.49086e-08	1.63633e-07	9.4485
NOP58	1.15136	8.76262	7.04165	1.49771e-08	1.64259e-07	8.96244
XKR4	8.27435	-1.08586	7.04148	1.49852e-08	1.64259e-07	9.5399
CASP8	-1.83159	5.65512	-7.03811	1.51496e-08	1.65953e-07	9.29611
AHCYL2	2.63967	4.35814	7.03729	1.519e-08	1.66287e-07	9.48629
ZNF800	-1.35754	5.58016	-7.0357	1.52679e-08	1.6703e-07	9.26418
ID2-AS1	4.87082	-1.14716	7.03525	1.52903e-08	1.67167e-07	9.45606
KPNA5	-2.90102	3.28422	-7.03401	1.53516e-08	1.67727e-07	9.51781
CYTIP	-3.56463	6.10827	-7.03277	1.54134e-08	1.68293e-07	9.20303
AMN1	-3.15569	3.95894	-7.0313	1.54868e-08	1.68984e-07	9.47667
MND1	3.25072	2.65743	7.03054	1.5525e-08	1.69291e-07	9.52067
NTRK1	7.61828	-1.15418	7.03001	1.55514e-08	1.69469e-07	9.4787
ING4	-1.79444	4.95893	-7.02913	1.55959e-08	1.69843e-07	9.33405
C1orf198	4.5849	3.02011	7.02265	1.59261e-08	1.73327e-07	9.4988
CAMK2D	-4.05128	5.25136	-7.02163	1.59787e-08	1.73787e-07	9.38868
BTNL9	-5.55202	-0.754421	-7.01878	1.61267e-08	1.75282e-07	9.45305
HOXC6	4.98886	-2.95348	7.01697	1.62217e-08	1.76201e-07	9.37164
ZNF611	-5.42812	1.58323	-7.01635	1.62543e-08	1.76219e-07	9.47787
PPARD	-3.34591	2.48058	-7.01635	1.62543e-08	1.76219e-07	9.47959
GXYLT2	5.28722	-3.03101	7.01633	1.62549e-08	1.76219e-07	9.37193
TMEM14A	2.7109	6.15293	7.0136	1.63993e-08	1.77669e-07	9.23686
ADCY1	7.16348	-0.163018	7.01215	1.64765e-08	1.78391e-07	9.44607
TTBK1	5.62484	-3.1804	7.01068	1.65549e-08	1.79124e-07	9.35894
LIX1	-6.37145	-1.32487	-7.00528	1.68464e-08	1.82161e-07	9.4139
PKIG	-1.89009	5.99542	-7.00306	1.69681e-08	1.83358e-07	9.08357
IRX5	5.70713	-3.18717	7.00245	1.70018e-08	1.83604e-07	9.33409
NOLC1	1.38581	7.86941	7.00141	1.70592e-08	1.84005e-07	8.93264
LAX1	-5.25513	0.866017	-7.00138	1.70608e-08	1.84005e-07	9.42783
CSF3	8.3237	-2.10074	6.99648	1.73334e-08	1.86824e-07	9.38768
CDIP1	-5.20879	0.409295	-6.99548	1.73893e-08	1.87307e-07	9.39183
ZNF682	-5.61208	-1.12843	-6.99417	1.74632e-08	1.87982e-07	9.37179
KIAA0930	-3.07962	2.43569	-6.99177	1.75997e-08	1.89329e-07	9.40271
TMEM80	-2.84135	3.12626	-6.99139	1.76212e-08	1.89439e-07	9.38996
KCNA6	-5.26355	-2.67736	-6.98915	1.77493e-08	1.90694e-07	9.31124
FGL2	-5.719	0.4995	-6.9873	1.78558e-08	1.91716e-07	9.37625
ETV3L	7.50791	-0.80669	6.98274	1.81212e-08	1.94441e-07	9.34866
SRGAP1	6.08218	1.61896	6.9816	1.81881e-08	1.95034e-07	9.35684
TBL1X	-4.99131	3.53258	-6.97987	1.82905e-08	1.96006e-07	9.36138
PRG2	5.56879	-1.20144	6.97528	1.8564e-08	1.9881e-07	9.29428
VPREB1	-4.46179	-4.29612	-6.97232	1.87431e-08	2.006e-07	9.23117
GPX7	-4.76961	1.30657	-6.97189	1.8769e-08	2.00749e-07	9.3413
IFNGR1	-2.19596	6.4965	-6.96831	1.89878e-08	2.02961e-07	8.9609
NAALADL1	-4.70673	0.578415	-6.96718	1.90578e-08	2.03578e-07	9.30875
VN1R1	-4.84469	-2.1726	-6.96569	1.91497e-08	2.0443e-07	9.23903
ZNF530	-5.36407	-1.23569	-6.96412	1.9247e-08	2.05338e-07	9.26569
NDRG1	-4.45387	0.921142	-6.96391	1.92601e-08	2.05347e-07	9.30008
LOC101928429	-6.18034	-0.715465	-6.96334	1.92958e-08	2.05597e-07	9.28257
BCAN	5.3133	-2.47681	6.96292	1.93224e-08	2.0575e-07	9.21733
CCDC88C	-1.81804	4.8629	-6.96236	1.93574e-08	2.05992e-07	9.14695
FLVCR2	5.92249	1.0334	6.96184	1.93897e-08	2.06201e-07	9.28937
C16orf59	6.98599	0.565794	6.96165	1.94017e-08	2.06201e-07	9.28835
CERS6	-4.69871	0.486113	-6.96011	1.94985e-08	2.07074e-07	9.28628
OTP	5.65135	-3.24114	6.95996	1.95085e-08	2.07074e-07	9.20741
SYN3	-5.43354	-2.62475	-6.95867	1.95897e-08	2.07805e-07	9.22505
RB1	-1.76617	6.10311	-6.95745	1.96677e-08	2.08499e-07	8.96849
CABP4	-5.58168	-2.05999	-6.95673	1.97133e-08	2.08851e-07	9.23736
FAM167A	-4.76188	0.367112	-6.95348	1.99217e-08	2.1086e-07	9.24554
PSME2	1.31881	9.09765	6.95339	1.9928e-08	2.1086e-07	8.63152
POU2F3	6.87414	-1.59745	6.94951	2.01799e-08	2.13324e-07	9.22746
LOC105377102	-4.0532	-2.5932	-6.94941	2.01863e-08	2.13324e-07	9.16806
ZNF284	-5.3114	-1.45934	-6.94436	2.05188e-08	2.167e-07	9.21134
ERH	1.7881	7.1031	6.94341	2.05824e-08	2.17236e-07	8.85041
FLJ32255	-4.60515	3.80756	-6.94186	2.06861e-08	2.18193e-07	9.22462
RFC5	2.03798	5.74562	6.94067	2.07661e-08	2.18899e-07	9.01583
BACE2	-4.45857	2.30821	-6.9394	2.08514e-08	2.19661e-07	9.23347
DMXL2	5.86271	2.05338	6.93901	2.08777e-08	2.19799e-07	9.22865
ST3GAL5-AS1	-4.40392	-3.2254	-6.93772	2.09651e-08	2.20581e-07	9.13339
PANDAR	2.99098	2.36451	6.93747	2.09822e-08	2.20622e-07	9.23406
TMEM198	5.93761	-2.16407	6.9364	2.1055e-08	2.21249e-07	9.15243
HSD17B4	-1.15815	5.92907	-6.9361	2.10756e-08	2.21327e-07	8.92691
EPOP	5.04286	0.229158	6.93538	2.11249e-08	2.21706e-07	9.18113
CCNF	2.84124	3.38208	6.93431	2.11979e-08	2.22333e-07	9.21932
NEK8	-3.19049	3.91823	-6.93385	2.12299e-08	2.22529e-07	9.15574
FNIP2	8.35388	2.24979	6.93351	2.12532e-08	2.22635e-07	9.21858
DIAPH2	-5.60907	1.51604	-6.93179	2.13718e-08	2.23737e-07	9.21338
FIG4	-1.86671	5.11069	-6.93095	2.143e-08	2.2416e-07	9.00532
YWHAE	2.07398	8.6954	6.93082	2.1439e-08	2.2416e-07	8.65162
ADD1	-2.05039	6.11381	-6.92993	2.15009e-08	2.24667e-07	8.88852
ANKRD33B	2.4137	5.3986	6.92822	2.16205e-08	2.25776e-07	9.03353
KRTAP16-1	-4.92214	-3.09431	-6.92767	2.16587e-08	2.26035e-07	9.11239
SRPK1	2.15987	6.58368	6.92257	2.20198e-08	2.29661e-07	8.85963
RAD51C	1.72204	5.72361	6.91946	2.22428e-08	2.31842e-07	8.93467
LOC101929057	-3.91423	-0.43629	-6.91797	2.23502e-08	2.32817e-07	9.11908
GART	1.29885	6.91896	6.91365	2.26658e-08	2.35958e-07	8.75952
C10orf55	4.79939	-3.42772	6.91211	2.27791e-08	2.3699e-07	9.05481
DNMBP	-5.66762	0.519624	-6.90955	2.29689e-08	2.38817e-07	9.1299
AFF4	-1.56718	5.80068	-6.90739	2.31301e-08	2.40343e-07	8.84072
AGPAT3	2.34071	4.72857	6.90132	2.35893e-08	2.44964e-07	9.02433
LOC101927730	-4.12644	-4.05232	-6.90049	2.36535e-08	2.45478e-07	9.01417
RAB3IP	2.68074	6.0734	6.89989	2.36992e-08	2.458e-07	8.83306
BSDC1	-1.42003	6.00158	-6.89708	2.39161e-08	2.47897e-07	8.76876
MAIP1	1.848	4.50254	6.89155	2.43489e-08	2.52227e-07	8.98372
BRCA1	3.12785	4.68688	6.89093	2.43979e-08	2.52579e-07	9.02735
LOC105376430	5.36596	-3.15174	6.89009	2.44644e-08	2.53037e-07	8.99756
TNFRSF1B	-4.50491	2.3322	-6.88999	2.44724e-08	2.53037e-07	9.07934
RAI14	7.38978	-0.0134823	6.88958	2.45046e-08	2.53215e-07	9.07597
SCML1	-5.5723	0.125995	-6.88809	2.46236e-08	2.54287e-07	9.07056
DET1	-4.06751	0.855016	-6.88554	2.48279e-08	2.56239e-07	9.04789
LOC101929294	-4.8146	1.47501	-6.88369	2.49769e-08	2.57619e-07	9.06662
HMOX1	-4.81042	0.619773	-6.88266	2.50609e-08	2.58326e-07	9.04231
EIF2S1	1.66412	8.01243	6.88223	2.50957e-08	2.58526e-07	8.54385
PRKD2	-3.28715	4.82792	-6.8793	2.53355e-08	2.60835e-07	8.9104
ARRDC4	-5.98866	-1.05621	-6.87901	2.5359e-08	2.60918e-07	9.01564
LOC105370489	-4.34902	-1.49797	-6.87878	2.5378e-08	2.60953e-07	8.9868
PTPN3	5.99697	-1.63056	6.87777	2.54612e-08	2.61648e-07	8.98249
HELQ	-1.88399	5.04551	-6.87472	2.57145e-08	2.64089e-07	8.84695
OGG1	-1.53582	4.92559	-6.87369	2.57999e-08	2.64804e-07	8.83937
KIFAP3	2.25167	6.13144	6.87343	2.58215e-08	2.64864e-07	8.74276
ACHE	7.51371	-0.183968	6.86801	2.62797e-08	2.69259e-07	8.99778
LOC100506098	-5.44002	-2.05989	-6.86798	2.62821e-08	2.69259e-07	8.96018
ETS1	-3.18822	5.73145	-6.86721	2.63479e-08	2.69768e-07	8.78582
STRA6	7.79468	-1.81243	6.8664	2.64176e-08	2.70317e-07	8.978
C1orf61	5.24281	-1.65045	6.86595	2.64556e-08	2.70541e-07	8.93707
LINC00528	-5.36414	0.328204	-6.86271	2.67354e-08	2.73235e-07	8.98684
EGR3	-5.57289	0.0776448	-6.86167	2.68257e-08	2.73992e-07	8.98696
SMTNL1	-4.48856	-1.52331	-6.85724	2.72137e-08	2.77785e-07	8.91415
CTGF	-6.36341	-2.08186	-6.8547	2.74393e-08	2.79918e-07	8.93939
OSBPL8	-1.36014	6.19245	-6.8545	2.74568e-08	2.79926e-07	8.62208
CLLU1	-4.4049	-4.18968	-6.8543	2.74744e-08	2.79935e-07	8.87707
ADGRE1	8.15274	2.34132	6.85324	2.75694e-08	2.80732e-07	8.96962
RNASEL	-4.99965	2.12292	-6.85285	2.76042e-08	2.80916e-07	8.97006
ZC3HAV1L	5.02215	-2.36872	6.84954	2.79021e-08	2.83776e-07	8.87754
CDKN2AIPNL	1.48162	5.49043	6.84563	2.82584e-08	2.87225e-07	8.71085
SYBU	-5.44758	-0.939238	-6.84229	2.85662e-08	2.90178e-07	8.8901
FAHD2CP	2.97279	0.716242	6.84127	2.86607e-08	2.90962e-07	8.89759
SPDL1	2.41613	5.12033	6.84054	2.87292e-08	2.91481e-07	8.80091
LOC101928238	-4.5152	-2.72235	-6.83877	2.8894e-08	2.92975e-07	8.84378
MRPL27	1.54871	6.00542	6.83839	2.89299e-08	2.93162e-07	8.60814
STAMBP	1.31801	6.16725	6.83616	2.914e-08	2.95113e-07	8.58597
FGGY	3.15781	5.31255	6.83439	2.93078e-08	2.96633e-07	8.74173
KIAA1524	1.90308	4.931	6.83327	2.94151e-08	2.97539e-07	8.76468
ZNF845	-5.17925	0.665979	-6.83122	2.96109e-08	2.9934e-07	8.89132
ALPK2	5.55785	3.82677	6.82972	2.97556e-08	3.00621e-07	8.88604
SETX	-2.36698	7.34199	-6.82872	2.98526e-08	3.01419e-07	8.40704
LOC100128573	-4.9157	-2.07639	-6.82838	2.98853e-08	3.01568e-07	8.83105
TEPP	-4.04259	-4.38865	-6.82794	2.99274e-08	3.01725e-07	8.79623
SELP	-5.8479	-2.54678	-6.82785	2.99369e-08	3.01725e-07	8.83498
MDH1B	5.50525	-1.39687	6.82699	3.002e-08	3.02381e-07	8.83709
MRPL13	1.62137	6.49243	6.82633	3.0085e-08	3.02744e-07	8.53584
ARL8B	1.66505	6.64478	6.82625	3.00921e-08	3.02744e-07	8.49566
IFIT5	-3.66365	3.22359	-6.82534	3.01817e-08	3.03463e-07	8.87178
CFAP61	4.55336	-3.62397	6.82413	3.03002e-08	3.04473e-07	8.78743
MRNIP	-2.50584	2.38398	-6.82377	3.03357e-08	3.04647e-07	8.87871
SPA17	3.63737	0.295314	6.82277	3.04344e-08	3.05455e-07	8.8261
CYTH1	-2.70231	5.3333	-6.82216	3.04946e-08	3.05876e-07	8.67478
PSMA2	1.32879	8.59734	6.82052	3.06575e-08	3.07326e-07	8.26206
RAPH1	5.12665	1.52555	6.81676	3.10334e-08	3.10909e-07	8.84587
GFM1	1.42549	6.37349	6.8154	3.11713e-08	3.12104e-07	8.50599
PCGF1	1.98218	5.10295	6.81476	3.12352e-08	3.12557e-07	8.65974
ZNF563	-5.30026	-0.156958	-6.81202	3.15143e-08	3.15162e-07	8.82893
RENBP	-5.90755	-2.32249	-6.81138	3.15801e-08	3.15632e-07	8.78935
FAM49A	-4.62609	4.03287	-6.80869	3.18572e-08	3.18032e-07	8.79568
ZFP36L1	-1.76428	7.51136	-6.80868	3.18582e-08	3.18032e-07	8.29761
ZNF888	-4.74452	-2.01865	-6.80741	3.19895e-08	3.19153e-07	8.76471
DLGAP1-AS1	-4.07134	1.47811	-6.80668	3.20656e-08	3.19722e-07	8.82467
ZCRB1	1.03783	6.62601	6.80638	3.20971e-08	3.19845e-07	8.42767
BMP7	7.03588	-2.09578	6.8026	3.24933e-08	3.23602e-07	8.77224
MTIF3	-1.35418	5.52906	-6.80055	3.27103e-08	3.25396e-07	8.5232
TNFAIP3	2.2182	7.41379	6.80053	3.27123e-08	3.25396e-07	8.3237
ZNF235	-5.50964	0.964469	-6.79879	3.28972e-08	3.27041e-07	8.79383
TSHZ2	3.71663	2.83586	6.79659	3.31339e-08	3.29199e-07	8.78939
LPXN	-2.48645	6.31961	-6.79538	3.32641e-08	3.30297e-07	8.4452
SEPHS1	1.909	5.34989	6.794	3.34131e-08	3.3158e-07	8.58861
GYPC	-4.3797	4.42138	-6.78912	3.39468e-08	3.36677e-07	8.70445
ITGB1BP1	2.16559	6.9124	6.7867	3.42148e-08	3.3894e-07	8.35015
SNX3	-2.05112	6.84865	-6.78669	3.42153e-08	3.3894e-07	8.32837
BTN3A3	-2.21706	4.62467	-6.78592	3.43017e-08	3.39595e-07	8.62371
CYFIP1	3.82572	3.53243	6.78501	3.44026e-08	3.40393e-07	8.75221
STX2	2.86385	4.51145	6.78176	3.47679e-08	3.43804e-07	8.67905
RIMS1	5.8155	-2.72322	6.78045	3.4916e-08	3.45066e-07	8.67699
ZNF430	-1.66489	5.74038	-6.77834	3.5156e-08	3.47233e-07	8.4266
MZB1	-3.62977	4.39936	-6.77779	3.52192e-08	3.47506e-07	8.62469
RCN1	4.09258	4.93088	6.77774	3.52251e-08	3.47506e-07	8.65416
HSP90B2P	2.41807	3.74845	6.77586	3.54402e-08	3.49372e-07	8.69107
GTPBP4	1.21754	6.93866	6.77566	3.54637e-08	3.49372e-07	8.30682
CASR	7.07636	-2.2342	6.77555	3.54767e-08	3.49372e-07	8.69843
LOC145474	-5.66706	-0.711171	-6.77503	3.55357e-08	3.49747e-07	8.7047
DPF3	-5.46917	0.275288	-6.77463	3.55825e-08	3.50002e-07	8.7103
SYNRG	-1.94967	5.53342	-6.77388	3.56688e-08	3.50646e-07	8.46583
MTCH2	1.3769	6.71776	6.77275	3.58006e-08	3.51735e-07	8.32238
TIAF1	-4.16716	-2.22034	-6.77196	3.58924e-08	3.52431e-07	8.63816
CFAP36	2.14238	5.01223	6.77073	3.60362e-08	3.53635e-07	8.56685
DQX1	5.34361	-1.33647	6.76865	3.62797e-08	3.55817e-07	8.66057
MLXIP	-2.44826	4.99048	-6.7682	3.63332e-08	3.56133e-07	8.54441
GPR63	6.03437	-1.88727	6.76716	3.64558e-08	3.57127e-07	8.63959
UFD1L	1.42209	6.75677	6.76597	3.65978e-08	3.58308e-07	8.27757
LRP2	7.6505	-1.6489	6.76546	3.66581e-08	3.58689e-07	8.67914
ATP10D	-4.48449	3.31189	-6.75981	3.73375e-08	3.64974e-07	8.66399
PDK1	-1.76461	5.30744	-6.75958	3.73648e-08	3.64974e-07	8.4488
CYBB	-3.96779	4.50336	-6.75957	3.73657e-08	3.64974e-07	8.51434
HPS4	-1.72086	5.10884	-6.75939	3.7388e-08	3.64979e-07	8.45352
GUSBP11	-3.12247	3.35926	-6.7571	3.76675e-08	3.67493e-07	8.63922
ZNF816	-5.66329	0.551769	-6.75526	3.78929e-08	3.69478e-07	8.65961
MIATNB	-2.84632	1.70158	-6.75261	3.82204e-08	3.72454e-07	8.65858
IL1R1	7.78982	0.923289	6.74885	3.86902e-08	3.76814e-07	8.64275
SCRN1	-5.12935	1.01845	-6.74837	3.87508e-08	3.77185e-07	8.64495
ZDHHC14	-4.92284	1.53927	-6.74795	3.88039e-08	3.77483e-07	8.64055
CD70	3.66973	4.139	6.7474	3.88725e-08	3.77931e-07	8.59233
LOC101928166	-4.39061	-2.6649	-6.74427	3.92698e-08	3.81572e-07	8.56292
ARL10	-4.67404	-1.68077	-6.74354	3.93635e-08	3.82262e-07	8.57571
KITLG	7.41453	-2.35937	6.74264	3.94782e-08	3.83153e-07	8.59344
RAB11FIP4	-3.81143	2.8592	-6.73783	4.01006e-08	3.88968e-07	8.58885
MRPL47	1.48058	6.53682	6.73742	4.01536e-08	3.89067e-07	8.23161
ST14	-6.72095	-0.656914	-6.7374	4.01571e-08	3.89067e-07	8.60435
CCDC34	1.95305	3.52936	6.73591	4.03522e-08	3.90655e-07	8.58084
PARD3	6.89452	-2.01737	6.73579	4.03677e-08	3.90655e-07	8.56037
ZNF736	-5.82401	0.808009	-6.73526	4.04369e-08	3.90881e-07	8.59988
DBI	1.00142	8.74337	6.73525	4.04376e-08	3.90881e-07	7.9693
SLC12A6	-5.66819	2.83353	-6.73376	4.06339e-08	3.92553e-07	8.59636
SRP54	1.25133	6.85487	6.73193	4.08774e-08	3.94473e-07	8.16407
LOC151174	-4.76899	-3.48468	-6.73191	4.08797e-08	3.94473e-07	8.51387
MAP2	-5.00743	-0.639226	-6.73165	4.09141e-08	3.94577e-07	8.55256
DNAH11	-5.3032	-1.73893	-6.72736	4.14884e-08	3.99886e-07	8.53718
ELK3	-4.03554	4.1316	-6.72557	4.17308e-08	4.01991e-07	8.52667
PSMB6	1.12314	8.0976	6.72322	4.20503e-08	4.04836e-07	7.98712
APOBEC3F	-2.49014	4.69568	-6.71864	4.26809e-08	4.10672e-07	8.38065
SNED1	-4.65737	0.078103	-6.71584	4.30716e-08	4.14194e-07	8.52314
CES3	5.79731	-1.24934	6.71355	4.33937e-08	4.17052e-07	8.48906
ZNF90	-5.48842	-1.37458	-6.71249	4.3543e-08	4.18247e-07	8.50035
CBX7	-2.55845	2.99053	-6.70966	4.39455e-08	4.21872e-07	8.50618
FBXO16	5.50786	-2.25311	6.70888	4.40567e-08	4.22474e-07	8.45633
POLR3GL	-1.28951	5.48887	-6.70887	4.40586e-08	4.22474e-07	8.23408
ZNF772	-5.60201	-0.241929	-6.70851	4.41102e-08	4.22727e-07	8.50402
PPM1E	5.73125	-1.73611	6.7075	4.42554e-08	4.23876e-07	8.46315
CMC1	1.8642	5.20566	6.70536	4.45638e-08	4.26586e-07	8.31702
INSM2	4.86158	-3.66272	6.70362	4.48158e-08	4.28754e-07	8.42567
LSM10	-1.61237	6.1299	-6.70207	4.50422e-08	4.30603e-07	8.129
AIMP2	1.75215	4.65901	6.70195	4.50605e-08	4.30603e-07	8.37178
OTX1	5.51657	-2.9041	6.70023	4.53131e-08	4.32771e-07	8.42248
PLD4	-7.61013	-0.849124	-6.69928	4.54535e-08	4.33865e-07	8.48702
MAP3K8	-1.43762	6.4657	-6.69803	4.56382e-08	4.3538e-07	8.05057
CREG1	3.68782	4.47281	6.69711	4.57755e-08	4.36441e-07	8.43212
ZNF737	-5.38864	1.89239	-6.69668	4.58396e-08	4.36804e-07	8.48404
OAS2	-5.28499	4.14483	-6.69539	4.60322e-08	4.3839e-07	8.44888
PHLDB2	-4.56159	-0.250052	-6.688	4.71515e-08	4.48795e-07	8.43846
MBP	-2.99057	4.84161	-6.68778	4.71847e-08	4.48856e-07	8.29277
TPCN1	-2.85919	3.47441	-6.68682	4.73324e-08	4.49942e-07	8.41301
H2AFV	1.5356	6.8811	6.68669	4.73524e-08	4.49942e-07	8.01561
HOXD8	5.2397	-3.24986	6.68602	4.74552e-08	4.50663e-07	8.38053
LINC01160	4.73671	1.1752	6.68536	4.75573e-08	4.51377e-07	8.43552
LOC101929634	-4.13319	-4.01428	-6.68427	4.77259e-08	4.52721e-07	8.3641
CARD11	-4.94628	2.76555	-6.68172	4.81238e-08	4.56237e-07	8.41119
RPS6KA5	-2.21964	4.48845	-6.68042	4.83279e-08	4.57913e-07	8.27766
NR3C2	-5.04136	0.425967	-6.67783	4.87362e-08	4.61522e-07	8.41274
PATJ	-5.0907	2.87957	-6.67763	4.87684e-08	4.61566e-07	8.42326
PLCL1	6.71533	-1.34686	6.67618	4.89991e-08	4.63488e-07	8.38976
GABARAP	-1.12782	7.99146	-6.67535	4.91308e-08	4.64471e-07	7.82713
STAG3L2	-1.7893	4.11107	-6.67428	4.93026e-08	4.65833e-07	8.30241
DTX3	2.72953	2.3573	6.66811	5.03013e-08	4.75002e-07	8.38693
LMBRD1	-2.24361	6.3428	-6.6663	5.05985e-08	4.77478e-07	8.01758
HCK	-5.96867	0.745234	-6.66617	5.06205e-08	4.77478e-07	8.38919
HKR1	-5.15065	2.45869	-6.66575	5.06894e-08	4.77794e-07	8.38189
LINC00959	-3.15879	1.51733	-6.66562	5.0711e-08	4.77794e-07	8.38682
NRIR	-5.13641	-2.99524	-6.66243	5.12397e-08	4.82505e-07	8.31506
ADTRP	5.85883	0.0861047	6.66058	5.1548e-08	4.85135e-07	8.36146
RNF157	5.31861	1.90764	6.65965	5.17047e-08	4.86337e-07	8.36408
ATIC	1.15231	7.57069	6.65777	5.20218e-08	4.89046e-07	7.84744
CENPP	2.65538	2.85265	6.6546	5.25614e-08	4.93841e-07	8.34868
MGMT	-5.15924	2.08235	-6.65418	5.26332e-08	4.94204e-07	8.35169
RIMS2	6.67424	-1.98513	6.65403	5.26589e-08	4.94204e-07	8.31377
FOXD1	6.096	-1.46846	6.65309	5.28197e-08	4.95436e-07	8.31221
TBC1D22A-AS1	-4.09139	-2.37759	-6.65188	5.30281e-08	4.97112e-07	8.28157
LOC100506113	4.54608	-1.14934	6.64888	5.35485e-08	5.0171e-07	8.2902
ZC3H6	-2.32561	3.69362	-6.64634	5.39924e-08	5.05587e-07	8.25698
JAZF1	-5.13333	2.45096	-6.6447	5.42824e-08	5.08019e-07	8.31717
PLK4	3.62207	3.53036	6.64243	5.46831e-08	5.1136e-07	8.30584
DSTN	1.69122	5.92797	6.64234	5.47004e-08	5.1136e-07	8.0073
ATF5	4.53775	4.06972	6.64094	5.4949e-08	5.13398e-07	8.28815
WWTR1	6.49482	-0.204613	6.63719	5.56239e-08	5.19414e-07	8.28239
SORT1	6.79988	-1.02493	6.6349	5.60407e-08	5.23015e-07	8.26022
QSOX2	-2.75825	3.25908	-6.63359	5.62802e-08	5.24958e-07	8.26365
L3MBTL3	-4.53141	3.0872	-6.63251	5.64781e-08	5.26511e-07	8.2745
FAM171A1	6.85743	-0.410612	6.63229	5.65183e-08	5.26594e-07	8.26255
ESR2	-3.5422	1.08096	-6.63173	5.66206e-08	5.27253e-07	8.2764
DOCK11	-3.96116	4.04054	-6.63008	5.69265e-08	5.29808e-07	8.23208
ZNF233	-5.18939	-1.54263	-6.62929	5.70732e-08	5.30612e-07	8.23652
LINC01238	-5.07689	-1.65135	-6.62927	5.70761e-08	5.30612e-07	8.23298
SMCO4	5.58568	2.29341	6.62907	5.71133e-08	5.30663e-07	8.27332
MICAL3	-3.268	4.41117	-6.62698	5.75032e-08	5.33991e-07	8.16863
PM20D1	-5.06816	-1.73557	-6.62658	5.7578e-08	5.34388e-07	8.22504
LOC102724297	-4.28014	-3.36901	-6.62594	5.76976e-08	5.35203e-07	8.19385
TMEM140	-3.46221	3.09722	-6.62558	5.77657e-08	5.35538e-07	8.24398
GALNT3	-5.53344	1.18588	-6.623	5.82533e-08	5.3976e-07	8.25329
HCLS1	-1.76404	7.80389	-6.61961	5.88979e-08	5.45432e-07	7.62232
CPNE2	5.21465	0.290285	6.60528	6.17115e-08	5.71007e-07	8.1755
KIFC1	4.61325	3.34042	6.6052	6.17277e-08	5.71007e-07	8.19206
CDK6	2.97895	5.54065	6.605	6.17668e-08	5.71054e-07	8.02972
C1QTNF1	5.59687	-3.3878	6.6005	6.26792e-08	5.7917e-07	8.12204
IFI30	-1.95936	7.7968	-6.59746	6.33026e-08	5.84607e-07	7.60546
PARP2	1.30689	5.19382	6.59636	6.3529e-08	5.86376e-07	7.94347
RIPK3	-4.94516	1.67111	-6.59544	6.37185e-08	5.87656e-07	8.16561
CIT	3.99521	2.44851	6.59535	6.37378e-08	5.87656e-07	8.16818
KCNQ5	-5.9351	-0.595106	-6.59474	6.38646e-08	5.88502e-07	8.14541
NME5	4.94273	-3.72977	6.59405	6.4009e-08	5.89509e-07	8.09888
OTUD1	-3.65759	5.03885	-6.59383	6.40536e-08	5.89596e-07	7.95313
MANBA	-2.71205	4.89135	-6.5928	6.42687e-08	5.91251e-07	7.98865
PSMB3	1.12413	8.68321	6.58875	6.51228e-08	5.9878e-07	7.50037
ILF3-AS1	-1.44761	5.83948	-6.58644	6.56141e-08	6.02967e-07	7.77606
FGD3	-4.68927	3.38459	-6.58554	6.58054e-08	6.04393e-07	8.08539
SNRPF	1.69489	6.94589	6.58456	6.6016e-08	6.05996e-07	7.68028
CLK4	-1.40565	6.44174	-6.58173	6.66271e-08	6.11271e-07	7.70007
JCHAIN	-5.62318	3.42407	-6.58128	6.67253e-08	6.11837e-07	8.07832
PYGM	-4.39878	-0.320489	-6.58094	6.67996e-08	6.12183e-07	8.10079
PARP12	-2.2551	5.28004	-6.57923	6.7171e-08	6.15251e-07	7.8662
UTP11	1.69329	5.8311	6.57468	6.81751e-08	6.23788e-07	7.81273
PBXIP1	-3.59792	3.51211	-6.57467	6.81775e-08	6.23788e-07	8.05219
PSMD14	1.06581	7.03879	6.57439	6.82386e-08	6.24008e-07	7.63893
TLE4	-1.75474	4.51937	-6.57398	6.8329e-08	6.24493e-07	7.89631
ATP5J	1.47526	8.2471	6.57363	6.84079e-08	6.24874e-07	7.49794
TMEM19	-1.21834	5.87424	-6.57156	6.88699e-08	6.28543e-07	7.7269
SERPINB9	-4.60218	4.47153	-6.5715	6.88845e-08	6.28543e-07	8.02305
ZNF331	-4.45296	4.3044	-6.57071	6.90602e-08	6.29803e-07	7.98685
CDC123	1.10793	7.81291	6.56861	6.95358e-08	6.33796e-07	7.52903
KRT18	-5.16338	-2.25131	-6.56716	6.98652e-08	6.36453e-07	8.04217
C5orf30	3.15133	2.55734	6.56654	7.00062e-08	6.37391e-07	8.07874
MRPL35	1.6287	5.64671	6.56624	7.00727e-08	6.3765e-07	7.79617
UBASH3A	5.99749	-0.538814	6.56481	7.04008e-08	6.40288e-07	8.04611
CDH11	7.74071	-1.70081	6.56291	7.0837e-08	6.43907e-07	8.05477
HIP1R	-6.20193	2.88872	-6.56193	7.10641e-08	6.45621e-07	8.05509
COL1A1	6.73512	1.66589	6.56051	7.13944e-08	6.48271e-07	8.0597
MAGEB4	5.04934	-3.04203	6.55821	7.19307e-08	6.52786e-07	7.99012
MTUS1	6.19355	2.0245	6.55768	7.20539e-08	6.53237e-07	8.04966
SEMA6A	3.62262	4.28491	6.55766	7.20582e-08	6.53237e-07	7.98099
PIGR	-5.3281	-3.1838	-6.55733	7.21369e-08	6.53597e-07	7.99733
LDLR	5.0296	2.89889	6.55582	7.24912e-08	6.56452e-07	8.04544
SEC61B	1.42867	7.16398	6.55416	7.28861e-08	6.59672e-07	7.54011
CPPED1	2.07586	4.97329	6.55124	7.35823e-08	6.65614e-07	7.84177
AP1G2	-1.50557	6.83269	-6.55099	7.36422e-08	6.65797e-07	7.54183
PLPP4	5.73823	-2.49533	6.54847	7.42484e-08	6.70916e-07	7.96936
ZNF347	-4.5087	0.198745	-6.54777	7.44165e-08	6.72073e-07	8.01742
ABCC4	3.30839	3.72794	6.54752	7.4478e-08	6.72266e-07	7.99013
PROS1	4.80469	-3.12914	6.54698	7.46103e-08	6.73098e-07	7.9524
MCOLN3	5.4144	-2.4873	6.54577	7.4904e-08	6.75384e-07	7.95936
MSRB3	6.5056	-1.44404	6.5443	7.52634e-08	6.7826e-07	7.98955
TSTD1	-2.74566	5.48385	-6.54396	7.53473e-08	6.78652e-07	7.71017
CSRP2	5.50254	0.503157	6.54361	7.54327e-08	6.79056e-07	7.9909
PHF7	-2.71908	1.74042	-6.5419	7.58544e-08	6.82486e-07	8.00199
C17orf53	4.30946	2.61879	6.5409	7.6101e-08	6.84337e-07	7.99779
CKS1B	2.25291	5.0876	6.54038	7.62295e-08	6.84745e-07	7.82155
KHDRBS3	4.91121	0.986456	6.54023	7.62684e-08	6.84745e-07	7.98575
FZD1	5.64831	-1.47213	6.54023	7.62688e-08	6.84745e-07	7.95713
ARHGAP26	2.44412	5.0887	6.53968	7.64056e-08	6.85606e-07	7.8088
CALCOCO1	-2.38958	4.36391	-6.53757	7.69319e-08	6.89652e-07	7.84917
ZNF91	-4.11849	3.8111	-6.53754	7.69387e-08	6.89652e-07	7.93943
RASSF5	-3.4336	5.30724	-6.53479	7.76308e-08	6.95484e-07	7.76259
ZNF818P	-5.54128	-1.59999	-6.53457	7.76867e-08	6.95613e-07	7.95574
CRLF3	-1.65307	5.60578	-6.52801	7.93647e-08	7.10219e-07	7.65381
CACNA2D1	7.40164	-1.66199	6.52786	7.94026e-08	7.10219e-07	7.94086
AS-PTPRE	-4.08864	-3.82035	-6.52748	7.95008e-08	7.10719e-07	7.89065
UNC13B	8.09555	-0.0721332	6.52517	8.01011e-08	7.15704e-07	7.94765
FAM3D-AS1	5.17648	-3.39314	6.52243	8.08195e-08	7.21738e-07	7.88688
LOC100128988	4.16832	-3.97246	6.51953	8.15869e-08	7.28203e-07	7.86734
LOC100506274	5.83628	-2.54659	6.51936	8.1632e-08	7.28218e-07	7.88696
SLC22A7	-4.0325	-4.32751	-6.51899	8.17312e-08	7.28716e-07	7.86476
RGPD2	-4.78836	-1.64347	-6.51735	8.21681e-08	7.32222e-07	7.89624
ARHGAP30	-2.37676	5.45158	-6.51597	8.25399e-08	7.35144e-07	7.65434
MCF2L	-4.84181	-1.87007	-6.51426	8.30011e-08	7.3886e-07	7.8772
DOK7	-6.24776	-2.26816	-6.51251	8.34742e-08	7.42677e-07	7.88376
TMEM92	5.45966	-3.34165	6.51179	8.3672e-08	7.44042e-07	7.85258
MOXD1	-5.56231	-1.607	-6.50883	8.44803e-08	7.50832e-07	7.88197
SNTB1	-5.66007	-0.647195	-6.50844	8.45878e-08	7.51389e-07	7.87976
CDH2	6.91255	-2.67956	6.50823	8.46475e-08	7.51521e-07	7.87469
TRAF4	-2.01209	3.87744	-6.50492	8.55649e-08	7.59264e-07	7.79803
DLX4	5.12679	-2.49324	6.50471	8.56245e-08	7.59391e-07	7.83677
DGKD	-2.7751	5.34473	-6.50389	8.58513e-08	7.61e-07	7.63272
RNPC3	-1.77742	5.14693	-6.49979	8.70064e-08	7.70832e-07	7.61686
RASGRP1	2.63207	6.03055	6.49283	8.90024e-08	7.88099e-07	7.53619
GGT8P	6.85215	-2.04023	6.49155	8.9374e-08	7.90607e-07	7.82352
ZNF629	-4.40697	-1.68023	-6.49146	8.94e-08	7.90607e-07	7.79788
C10orf10	8.02095	2.48339	6.49137	8.94271e-08	7.90607e-07	7.84489
ST8SIA1	7.18857	-1.3123	6.48954	8.99628e-08	7.94924e-07	7.81723
UNG	2.10023	5.22849	6.48763	9.05228e-08	7.99452e-07	7.63078
ZNF134	-4.6562	1.63495	-6.48427	9.15201e-08	8.07834e-07	7.81899
CDK5	1.76431	4.08733	6.48275	9.19738e-08	8.11411e-07	7.73448
LINC01630	8.41878	0.170481	6.48037	9.26895e-08	8.17295e-07	7.81057
STK33	2.37067	2.80701	6.47889	9.31399e-08	8.20835e-07	7.78665
WFS1	4.50219	1.88837	6.47814	9.33672e-08	8.22406e-07	7.80288
LOC148696	-4.80997	-1.51488	-6.47602	9.40137e-08	8.27666e-07	7.76957
PITX2	4.85669	-3.30485	6.47337	9.4829e-08	8.34405e-07	7.73062
ENO3	4.73236	4.63246	6.47231	9.51575e-08	8.36857e-07	7.72313
MANF	1.97473	5.32306	6.47078	9.56339e-08	8.40606e-07	7.55697
STK17A	-1.99562	6.97748	-6.47013	9.58354e-08	8.41552e-07	7.26335
TK1	3.45188	5.41511	6.47011	9.58418e-08	8.41552e-07	7.60509
LYPD6B	-5.06377	-2.42243	-6.46849	9.63501e-08	8.45136e-07	7.73529
C6orf10	-4.68052	-2.86631	-6.46849	9.63509e-08	8.45136e-07	7.72424
PPCS	-1.1056	6.46847	-6.46762	9.6623e-08	8.4708e-07	7.3183
ZNF394	-1.62344	5.30537	-6.46678	9.6889e-08	8.48968e-07	7.47962
MRAS	6.07093	-2.35261	6.46608	9.71098e-08	8.50305e-07	7.73577
CHST15	-4.68065	2.75161	-6.46597	9.71429e-08	8.50305e-07	7.74773
PLEKHM1P1	-2.43117	2.94702	-6.46327	9.80014e-08	8.57371e-07	7.71434
WWP2	-1.86301	5.12478	-6.45839	9.95756e-08	8.70689e-07	7.49975
SLC25A3	1.23583	8.10419	6.45746	9.98752e-08	8.72854e-07	7.13823
RASSF8	6.01064	-1.31239	6.456	1.00354e-07	8.76585e-07	7.70715
SAPCD2	5.51142	0.991995	6.45442	1.0087e-07	8.80628e-07	7.72208
DNAJC10	-1.46701	7.12368	-6.45262	1.01465e-07	8.85363e-07	7.21492
CEPT1	-2.23497	6.0726	-6.45185	1.01721e-07	8.87137e-07	7.35213
RASAL1	-4.56941	-3.62063	-6.45056	1.02148e-07	8.904e-07	7.66192
MRPL32	1.35044	6.85175	6.44977	1.02413e-07	8.92245e-07	7.24322
DISP1	-3.62457	1.84807	-6.4449	1.04051e-07	9.06039e-07	7.70029
IVL	5.23941	-3.61039	6.4444	1.04221e-07	9.0705e-07	7.64519
HDAC9	-5.07316	3.25604	-6.44118	1.05321e-07	9.16153e-07	7.66106
BCAR3	-3.74189	2.37826	-6.43975	1.05813e-07	9.19954e-07	7.67598
NPTN	1.57603	5.71201	6.43604	1.071e-07	9.30664e-07	7.37406
KIAA0895L	4.67889	0.838285	6.43378	1.07891e-07	9.37044e-07	7.65576
LINC01116	5.99064	-2.6655	6.43336	1.08038e-07	9.37836e-07	7.62766
RGL1	5.25491	0.281974	6.4328	1.08238e-07	9.39091e-07	7.64547
SCML4	-4.73768	1.83103	-6.43234	1.08401e-07	9.39987e-07	7.65692
HAMP	-4.25531	-3.1549	-6.43219	1.08454e-07	9.39987e-07	7.60952
HLA-DQA1	-2.34824	8.43315	-6.43089	1.08913e-07	9.43063e-07	6.99564
CTSO	-4.01454	2.20588	-6.43087	1.08921e-07	9.43063e-07	7.63952
KDM4B	-4.83519	3.23195	-6.43051	1.09046e-07	9.43661e-07	7.62767
LOC105372071	4.53291	-4.01639	6.43034	1.09109e-07	9.43714e-07	7.59848
NPM3	3.07815	3.2416	6.43003	1.09217e-07	9.44166e-07	7.63543
ZNF107	-3.32014	5.29874	-6.42978	1.09307e-07	9.44458e-07	7.44922
CMAS	1.70748	5.3934	6.42845	1.09781e-07	9.48061e-07	7.39854
SON	-1.05079	8.90737	-6.42374	1.1148e-07	9.62237e-07	6.93028
ENOX1-AS2	4.29815	-4.44005	6.42328	1.11647e-07	9.63189e-07	7.5768
WDR41	1.36268	5.91252	6.41778	1.13667e-07	9.8011e-07	7.27145
LLPH	1.44682	6.37246	6.41248	1.15649e-07	9.96688e-07	7.18645
CDK7	1.40033	5.56211	6.41093	1.16237e-07	1.00124e-06	7.29025
C4orf32	2.68296	3.25813	6.41076	1.163e-07	1.00126e-06	7.57181
FAM213A	-5.43646	0.0543244	-6.40954	1.16766e-07	1.00476e-06	7.58901
EHF	6.3248	-1.74185	6.40921	1.16889e-07	1.00531e-06	7.56658
HIGD1A	1.72266	7.07605	6.40772	1.17459e-07	1.00969e-06	7.10954
MYLIP	-2.71443	5.99046	-6.40526	1.18405e-07	1.0173e-06	7.19355
TSGA10	-3.38358	2.16327	-6.40493	1.18532e-07	1.01787e-06	7.57207
ZDHHC11	4.85642	-0.696682	6.40384	1.18955e-07	1.02098e-06	7.54338
OLA1	1.59947	6.6766	6.4013	1.19946e-07	1.02896e-06	7.13754
IDS	-1.54079	6.95225	-6.39965	1.20593e-07	1.03398e-06	7.07454
LINC01507	-4.05937	-4.33723	-6.39943	1.20676e-07	1.03416e-06	7.5032
NAV3	5.81857	-2.79547	6.39733	1.21508e-07	1.04076e-06	7.51266
UBE2H	-1.53779	5.51033	-6.39562	1.22186e-07	1.04554e-06	7.21261
TCP11L2	-3.72608	1.71322	-6.39561	1.22191e-07	1.04554e-06	7.54438
ECE2	3.29889	3.2752	6.39331	1.2311e-07	1.05287e-06	7.52396
SUV39H2	2.28005	3.9846	6.39169	1.23761e-07	1.0579e-06	7.46976
NMU	6.8909	-2.38572	6.39111	1.23997e-07	1.05938e-06	7.5114
NIFK	1.39278	6.81371	6.3908	1.2412e-07	1.05989e-06	7.06491
HYDIN	5.09814	-2.77557	6.38761	1.25422e-07	1.07046e-06	7.47972
TNNT1	6.37688	-1.7009	6.38688	1.25718e-07	1.07244e-06	7.49263
C2CD4D	5.97847	-1.41736	6.38618	1.26008e-07	1.07437e-06	7.49614
CDH13	-4.57103	-3.14127	-6.38451	1.26695e-07	1.0793e-06	7.46376
FAM214A	-2.22792	5.36376	-6.38446	1.26716e-07	1.0793e-06	7.22421
C9orf47	4.92689	-3.92029	6.38314	1.27263e-07	1.08342e-06	7.45702
FAM81A	-5.06017	-1.99275	-6.38156	1.27917e-07	1.08843e-06	7.46933
CACHD1	6.13711	-1.81154	6.37978	1.28664e-07	1.09423e-06	7.474
COMMD1	1.26789	6.76362	6.37686	1.29897e-07	1.10416e-06	6.99924
FAM177A1	1.37821	4.64934	6.37666	1.29981e-07	1.10431e-06	7.29958
ZNF208	-6.13441	-1.07707	-6.3759	1.30301e-07	1.10647e-06	7.47778
IGHV1OR15-3	-4.51612	-1.90074	-6.37546	1.30489e-07	1.10751e-06	7.45226
SIGLEC14	-6.82264	0.436305	-6.37428	1.30994e-07	1.11123e-06	7.48024
TBC1D1	-2.42949	4.24595	-6.37065	1.32551e-07	1.12387e-06	7.32091
ZNF44	-5.57614	1.28642	-6.36857	1.33457e-07	1.13068e-06	7.46158
INPP1	2.45992	4.63224	6.36849	1.33489e-07	1.13068e-06	7.27152
CAMK2N2	4.59342	-2.79512	6.36514	1.34958e-07	1.14255e-06	7.40238
ZNF433	-4.38162	-0.157105	-6.36402	1.35451e-07	1.14614e-06	7.43891
CSTF2	1.36069	5.55906	6.36197	1.36359e-07	1.15324e-06	7.14161
ITPR3	-3.46865	4.36988	-6.35975	1.37351e-07	1.16104e-06	7.31572
WDR62	4.74019	1.27733	6.35766	1.38289e-07	1.16839e-06	7.42461
SLC26A5	5.75538	-0.501913	6.35568	1.39185e-07	1.17537e-06	7.41447
CRTC1	-3.65363	0.086852	-6.35185	1.40935e-07	1.18954e-06	7.39639
CDON	4.67875	-2.50351	6.35147	1.4111e-07	1.19042e-06	7.36227
AKR1C3	5.70679	-2.31518	6.34731	1.43039e-07	1.20609e-06	7.36032
TSPAN5	2.59447	3.7995	6.34514	1.44056e-07	1.21405e-06	7.3399
MRPS23	1.37323	6.25331	6.34484	1.44193e-07	1.2146e-06	7.00193
DLL1	-4.66723	-0.848438	-6.34302	1.45054e-07	1.22123e-06	7.368
CDK2AP1	4.2449	3.53871	6.34265	1.45228e-07	1.22209e-06	7.36538
DTNBP1	-1.76677	5.74013	-6.34246	1.45317e-07	1.22222e-06	7.01208
GVINP1	-6.04632	2.86546	-6.34001	1.46483e-07	1.23141e-06	7.36113
TMEM217	5.73065	0.391678	6.33964	1.46663e-07	1.23231e-06	7.36988
PHKA1	7.96729	0.0461787	6.33761	1.47636e-07	1.23986e-06	7.36639
PFDN4	1.69549	5.68879	6.33401	1.49383e-07	1.2539e-06	7.03075
[truncated: 14,773 more rows]

## Sheet: Raw_counts
Datatable S2: Raw count files for RNAseq data
	Case19_HRS	Case11_B	Case11_HRS	Case12_B	Case12_HRS	Case13_B	Case13_HRS	Case17_B	Case17_HRS	Case14_B	Case14_HRS	Case18_B	Case18_HRS	Case15_B	Case15_HRS	Case16_B	Case16_HRS	Case6_B	Case6_HRS	Case7_B	Case7_HRS	Case8_B	Case8_HRS	Case9_B	Case9_HRS	Case2_B	Case2_HRS	Case3_B	Case3_HRS	Case4_B	Case4_HRS	Case5_B	Case5_HRS	HDLM2	KMH2_1	KMH2_2	L1236	L428_1	L428_2	Case10_B	Case10_HRS
SGIP1	2	0	0	0	0	8	0	0	0	0	0	0	0	0	0	20	0	1	0	6	0	0	0	6	1	10	0	6	2	4	0	2	0	0	52	20	4	0	0	0	0
SLC45A1	100	0	0	46	0	0	0	0	0	0	0	0	0	0	180	0	0	5	30	9	0	7	0	30	0	0	49	0	0	24	4	15	10	72	0	18	0	0	13	0	0
NECAP2	20164	11651	8106	7255	19529	6500	10879	11199	10785	8968	16160	13016	4465	5959	16946	12405	6085	3546	8229	3046	5525	2916	5147	3678	13052	1481	4788	3905	25868	2086	13570	2827	1789	4754	5304	7373	3465	3556	2834	2640	1435
CLIC4	1983	3934	1	2853	955	2336	812	2822	342	2552	290	3084	0	1292	346	4809	96	5147	759	2792	236	5234	210	2096	1097	2660	605	3869	1970	1937	1208	2522	598	5420	2744	2626	2178	6850	6150	1987	715
AZIN2	374	0	0	36	32	84	28	0	748	0	262	167	0	132	324	76	0	14	83	22	1	6	0	60	3	0	4	0	0	3	20	30	6	18	4	0	0	15	11	27	0
AGBL4	0	0	0	0	10	0	0	78	0	0	0	0	0	0	0	37	0	4	54	10	15	2	13	0	33	0	0	1	32	0	37	10	2	6	8	4	0	0	0	19	9
TGFBR3	0	0	76	0	715	0	1901	181	8799	2	2277	0	1688	696	4725	0	0	14	813	0	873	6	163	2	178	2	3366	0	2695	5	4971	0	682	9366	1185	1271	663	134	579	4	133
DBT	252	1154	734	1039	1118	587	483	595	1436	1060	186	1093	0	1025	581	1071	10	1920	1341	1102	394	1562	793	1282	741	1274	437	2159	4516	720	872	686	464	1631	1343	995	936	2092	2596	975	787
PRUNE1	448	1774	174	899	698	457	432	874	956	546	64	1130	0	450	2660	2084	1178	1193	1267	1106	950	670	866	605	1499	658	696	1778	1785	557	958	624	635	1279	1642	1699	1527	639	1171	795	389
RFWD2	5050	3261	1995	3106	3201	1926	1846	4939	3739	3576	3585	3015	2154	2784	4055	4220	1127	889	1010	564	516	571	522	729	621	788	689	1044	1398	634	853	753	599	892	1009	3100	1064	489	1439	645	1104
C1orf21	922	2	2848	18	10501	146	5713	100	3119	0	3963	0	8276	887	8489	12	1527	0	1520	8	2177	2	1448	0	1300	2	1611	2	3601	2	374	28	1179	4137	16	0	82	208	942	0	344
LIN9	751	541	1492	805	231	253	424	719	558	407	540	511	515	190	2276	810	1373	330	960	542	469	553	571	268	1074	124	482	287	475	126	998	386	587	1336	2275	1157	3338	1734	694	334	583
C1orf159	3948	2464	1362	1067	708	1946	1533	2815	1313	3215	3224	1448	2014	4357	803	3795	1276	37	54	18	3	43	2	41	26	6	34	156	14	112	44	4	26	23	11	804	10	28	203	19	0
PRKCZ	1645	1626	255	1037	37	1511	18	1034	1509	2348	29	2132	208	559	102	2440	0	40	16	22	66	62	2	46	15	138	4	137	0	39	86	21	25	2	25	180	17	65	45	34	2
PRDM16	0	0	0	0	130	0	137	0	0	0	0	0	0	0	0	0	406	0	2	0	0	0	8	0	116	0	0	0	0	0	0	0	0	0	7	2	3	0	29	0	0
ICMT	2216	1270	9429	303	5666	717	6110	1151	10395	4	5228	740	4728	574	3429	613	6975	271	3510	119	869	185	952	133	643	31	1925	391	2403	190	2309	100	1619	3246	1807	6528	1366	1886	4976	229	892
CAMTA1	5699	3628	3342	3771	3455	2547	4106	3703	2307	4674	3309	2768	1120	2997	2024	3094	4284	1221	2352	1147	1370	1168	883	1080	958	1969	2553	2489	2960	2080	2384	1683	1181	1930	3455	2822	1455	985	478	1102	173
LOC105378614	73	3	0	5	26	25	47	4	1	3	49	6	0	86	17	1	16	3	0	0	6	4	0	22	5	22	8	0	7	7	6	0	0	1	0	0	0	1	0	9	0
PINK1	1924	646	0	188	141	661	87	731	553	604	286	691	780	215	312	1425	350	33	28	12	12	18	0	15	17	9	0	0	0	13	40	6	15	20	23	271	6	7	200	15	0
PINK1-AS	88	215	49	156	15	75	86	232	204	140	56	95	6	40	31	158	17	135	214	92	52	55	65	58	63	3	13	137	543	51	138	15	71	111	86	341	42	102	223	63	70
USP48	6491	4163	4166	6319	6453	4201	3886	6810	4549	5641	4586	5674	1032	3891	7255	4628	951	2638	2871	1317	1547	1568	977	2138	1365	1667	1626	5861	5481	1298	3036	1299	1521	2145	1166	3266	1041	2048	3536	1964	1539
EPHB2	72	115	0	0	0	0	86	0	0	0	0	0	0	0	0	0	0	0	6	4	33	0	0	2	20	0	0	0	194	0	0	0	78	0	56	28	0	810	174	0	0
STMN1	71368	7763	38462	5527	23635	3838	19761	13337	56128	3525	26505	2658	26108	5420	58121	6199	18660	2828	30686	2632	16369	2546	15509	984	26203	1451	39930	4017	22069	969	14042	2375	38302	22432	35219	24638	31739	38962	15133	986	3422
NUDC	40565	17812	37061	13024	34851	13490	36871	19927	43891	18841	57024	21516	30926	11477	26918	18837	15721	811	3598	780	2521	769	1234	1504	2380	758	3184	1221	3355	883	4242	841	1858	1554	3424	10794	3020	5523	5414	598	644
EYA3	1250	928	799	1000	2332	1133	709	1621	1163	889	1662	1184	378	605	1367	1168	1127	2308	9427	1038	2839	2890	2956	1193	1833	1258	3085	3424	7467	880	3166	1156	3569	3681	1677	1436	1774	3713	2626	954	1200
EPB41	4942	3447	745	3041	2852	2648	1129	3851	1331	3351	1425	3358	1698	2899	2648	3106	696	1623	996	1111	1065	1202	884	1277	1069	1164	543	2931	6418	796	911	694	1285	963	686	2781	248	433	3388	1111	60
PUM1	3744	7040	2975	8116	3452	7012	3839	11249	4105	10744	3645	6936	912	3971	1839	12391	2820	8467	6454	8721	5218	7401	2886	5938	4603	5205	2449	6980	10031	3327	4031	3365	2217	4924	4836	3598	2423	7166	4305	7518	2660
KHDRBS1	12311	10747	4493	8654	13111	7519	11205	13794	14027	13503	10259	12993	7624	5620	10240	14023	8181	2905	5294	2349	3347	2180	2898	3263	4552	3193	4975	6092	12023	2660	6328	2892	3358	4564	4365	15844	4170	5720	14075	2607	5040
CSMD2	0	0	0	0	0	0	0	0	0	0	0	0	0	0	0	0	0	7	0	5	1	11	3	3	4	0	0	0	59	2	24	0	9	0	2	0	5	20	1	0	210
SFPQ	11948	16998	10654	10515	11965	15853	15569	19888	15175	24849	13655	20149	12377	8987	17065	22175	10694	5302	10880	3680	6143	3442	4721	3951	6412	6679	10771	8269	12257	3912	8757	5262	4370	4587	8752	25972	5176	9095	18814	3862	6380
THRAP3	26412	22595	9664	24603	18516	22141	15066	33037	17312	20492	19238	26799	12818	21657	15116	27319	8336	26636	27387	22097	19506	18532	14863	17648	22079	14412	16005	23195	47792	12945	21258	19004	14850	12273	15942	7340	12553	15330	8741	15262	4894
MACF1	4749	5550	254	9859	2664	7332	1208	6973	1441	7141	1590	7435	551	6939	1433	8359	1401	17446	6009	17220	3190	10625	3130	9387	3959	17832	2867	38697	19329	5097	5090	4097	2878	7886	2080	2673	4710	1100	2751	8556	2450
PTPRF	296	0	0	0	18	0	1135	0	140	0	0	0	0	0	114	0	62	2	2908	0	475	0	35	2	913	0	78	4	1095	14	2646	0	206	389	410	1031	675	134	102	4	224
RNF220	6625	6337	2523	6194	3209	4635	2749	6568	3644	8437	5830	6785	2918	5169	2022	9445	3991	567	565	557	406	341	237	711	512	477	182	481	426	589	448	547	415	784	533	5087	384	383	1384	473	210
GPBP1L1	4458	8106	2147	7645	2423	4074	1604	7492	3997	6186	2067	9731	6524	3144	2928	9965	1884	9759	7904	5695	2529	7888	2996	7384	5855	7123	3358	8052	20452	5934	5823	5401	3341	10435	4708	2816	2120	8982	3408	4562	1422
TRABD2B	0	0	0	0	279	0	100	0	134	0	0	0	0	0	0	0	0	0	169	2	52	0	0	0	0	0	25	2	0	0	76	0	0	1	0	0	0	0	0	0	0
FAF1	7233	4289	2720	3365	2462	4912	3465	5708	4086	5649	2816	6762	2074	2675	3226	6013	1828	648	775	323	326	413	464	357	769	434	1224	658	1685	226	690	522	514	1724	1138	4943	1325	2022	2978	497	824
RAB3B	0	0	0	0	76	0	2	0	2	0	0	2	0	0	0	1	0	2	72	0	0	0	0	0	0	8	1	11	4	5	2	0	1	1	0	0	0	2	0	0	0
SCP2	10138	9217	5118	6207	4299	2545	5000	6780	4137	5585	8050	7431	4080	3665	6588	6934	3229	6689	3043	6527	4402	8716	3508	3851	6458	4710	5236	10157	14903	5407	5284	8502	3271	9878	6923	2500	2885	5576	2267	5559	3155
TCEANC2	828	1940	1280	1816	1014	1963	972	2085	2171	638	1351	1319	38	51	534	1996	127	1206	920	964	506	1015	528	986	713	772	685	2145	2824	600	724	578	400	1438	1140	883	838	1013	680	674	542
USP24	1110	2470	1206	4745	1203	2191	705	2983	943	3618	818	3685	2003	3176	545	3404	668	9423	2661	5413	749	6466	1293	6631	2782	6555	1089	9042	4133	2586	2533	4035	1497	3094	2744	3274	2733	2296	5025	5737	3881
DAB1	129	0	0	2	0	0	0	0	0	0	0	33	0	0	0	0	0	0	10	0	0	0	3	0	12	5	0	0	24	0	0	0	4	7	6	9	0	0	0	4	0
FGGY	2451	594	11361	1146	10276	1007	9359	781	8376	1019	24904	1418	7455	1283	18607	795	7434	510	8322	551	4547	316	1298	394	6035	340	10640	1198	18141	384	6986	367	520	5479	1817	944	449	1993	3458	515	108
NFIA	620	10	268	159	234	25	26	0	4	141	450	36	1704	0	0	96	0	108	5030	58	551	108	947	62	878	26	181	502	620	55	183	57	214	6830	771	616	1118	5460	1565	48	18
USP1	6246	3288	4873	2678	4079	1752	4388	3867	7075	4585	2860	4628	0	2235	2561	3239	4324	1748	2536	1212	661	1379	1941	1161	2481	1711	2040	1913	3422	1057	2466	1349	2003	3986	3738	4585	4756	6433	6826	1165	3241
ITGB3BP	3301	1463	3894	2000	3667	1162	1838	1791	3259	1775	2419	2177	1582	1518	1706	2189	2753	1194	2524	1016	991	2315	912	1009	1246	1412	2690	1237	2702	1484	1197	1189	1353	3759	3160	1504	3907	2885	1191	948	426
CACHD1	410	0	16	0	896	0	64	0	321	0	0	0	0	172	472	0	71	0	143	0	159	2	643	0	460	2	165	6	35	0	0	0	492	291	0	0	729	290	493	6	2379
LEPR	0	0	44	0	0	0	0	0	0	14	0	2	0	0	0	132	0	52	281	88	147	91	10	15	41	394	266	39	2069	29	110	10	0	2252	102	80	117	190	69	19	8
LRRC7	0	56	0	0	0	0	0	0	0	0	0	0	0	0	40	0	0	0	0	0	0	0	0	15	0	0	0	1	4	0	0	0	0	0	12	5	4	0	0	0	0
NEGR1	0	0	0	0	0	0	0	0	0	0	0	0	0	0	0	0	0	0	2	0	4	14	0	20	0	0	0	0	59	13	0	0	1	12	8	0	6	0	12	6	28
ST6GALNAC3	356	492	0	728	0	298	0	187	0	316	0	326	0	292	0	586	0	254	161	305	11	125	0	290	54	423	0	125	28	266	0	153	11	0	0	0	0	25	0	190	2
PIGK	1622	1505	2921	708	2021	45	1049	843	4320	440	2980	1219	1080	746	1316	1136	3402	3078	3396	1596	1803	2386	1686	854	2779	1080	2674	1139	10973	1060	3592	1740	1939	9393	4849	1449	5161	6048	1950	1136	1075
DDAH1	15	134	0	6	306	188	10	60	0	45	70	124	0	62	0	12	48	372	0	73	2	194	0	392	249	514	36	546	95	70	65	68	40	33	0	3	2	6	0	191	104
CLCA4	0	0	0	0	0	0	0	0	0	0	0	0	0	0	0	0	0	3	0	0	0	3	0	0	0	0	0	0	0	0	0	0	0	0	0	0	0	0	0	0	0
PKN2-AS1	0	2	0	11	0	30	0	7	2	5	87	0	0	0	13	50	0	0	0	6	2	2	5	7	2	9	0	120	0	0	0	11	12	0	0	3	0	0	0	11	0
LRRC8C	2035	2253	391	1488	399	539	434	980	102	2078	1192	1288	0	103	969	1113	25	538	1109	551	235	747	2399	210	165	118	14	1210	8195	340	630	537	533	1957	183	665	1142	3018	2812	547	272
FAM69A	1099	3867	682	2541	1534	1549	1141	1875	1263	2167	465	2703	0	1553	1955	3658	1260	4000	1611	2362	625	2790	1458	1826	588	1611	454	2116	3172	1361	2095	3056	934	2718	2713	867	2643	1444	719	1042	520
GCLM	952	1074	1008	576	1528	835	1344	643	2375	912	996	818	2146	326	1146	962	1254	508	422	342	232	723	464	590	517	449	770	448	1101	351	626	410	656	1797	1155	1841	1640	2002	1929	299	511
LOC729970	316	14	0	45	0	34	0	131	0	98	0	80	0	79	489	101	0	0	3	4	7	0	3	26	8	4	0	16	0	8	0	1	6	5	0	0	0	0	0	4	19
LOC102723661	0	0	0	0	0	0	0	0	0	0	0	0	0	0	0	0	0	0	0	0	0	0	0	0	0	0	0	0	0	0	0	0	0	0	0	0	0	0	0	0	0
NTNG1	4	16	0	127	0	262	24	330	0	713	0	308	0	975	0	395	0	66	0	38	4	44	0	92	34	90	0	233	0	1	0	42	0	0	0	0	0	0	0	18	0
GNAI3	11997	10567	4482	8400	11241	3814	7219	6473	29363	10753	13038	7214	5480	4559	12892	8933	3452	6831	16473	5493	6055	7598	8570	4013	6458	5844	8439	8515	24215	3735	15121	6674	6085	14271	8191	3350	9933	25026	10179	3786	2686
KCNA2	0	6	0	0	0	0	0	0	6	0	0	0	0	0	0	2	1163	2	136	0	13	0	6	0	3	0	0	0	0	9	6	0	147	0	0	0	0	0	0	0	62
RAP1A	3382	2691	6417	5111	4990	2375	3690	3606	7378	2589	4241	3842	6126	1823	2943	2820	3135	3402	6617	2310	2781	3613	3128	2080	3159	3465	6613	4083	13959	2553	5438	2907	3556	12217	1663	3443	5203	12202	11333	2436	5265
RHOC	7825	2408	1450	1438	152	1142	1022	2339	14550	1279	506	2146	4	732	450	2188	1058	197	1166	350	1538	253	167	314	228	214	6	206	82	419	1244	312	4343	5021	1747	4302	1456	5305	3800	326	32
PHTF1	4829	1749	1571	1898	1850	1598	2140	2044	1756	1486	2385	1394	3455	1252	197	1817	571	524	675	309	129	374	707	493	315	363	235	841	2222	279	782	361	510	964	195	450	567	702	721	285	557
WDR3	845	2268	1436	871	3665	408	1419	1070	2256	948	3197	2085	2032	465	658	1449	2694	1599	2650	1271	1793	1505	2421	925	4148	624	2748	1697	3166	606	2587	958	1195	4833	8124	4296	8821	12107	3693	807	3108
NOTCH2	2388	3983	896	4145	2176	2406	1153	5101	4884	3087	1804	3469	484	1677	664	4187	1851	5237	2223	3973	1063	3867	1777	2810	3917	2209	1271	4083	4837	2287	3513	3537	2797	5904	2776	5643	3724	4344	7210	4512	3917
NBPF9	519	399	240	1001	271	494	122	811	687	973	137	879	328	769	62	885	95	1193	726	712	416	617	173	1216	978	700	531	726	409	307	798	450	370	625	456	589	225	437	249	716	520
PDZK1	0	2	14	0	174	9	2	27	0	116	0	88	12	61	0	2	8	25	30	1	17	15	7	28	127	19	0	102	90	19	11	26	24	260	13	18	32	16	3	33	0
LOC101927429	2	5	0	10	4	12	0	9	10	14	0	8	0	4	2	6	0	2	0	2	0	2	2	2	0	5	1	0	0	0	0	0	3	6	10	3	0	0	0	1	4
OTUD7B	218	48	134	20	173	0	127	0	655	0	663	0	136	0	222	0	52	24	601	8	286	19	255	58	870	20	424	3	242	28	563	6	387	426	187	705	396	458	854	37	442
TPM3	47245	44524	14766	43529	23761	35863	28279	53336	63410	55099	35426	45891	14217	19162	35166	49620	15633	30647	37133	27715	24114	32502	30324	30864	36938	24800	23964	27227	55384	18656	53400	27015	23218	21134	25680	21740	19010	33325	17757	24705	10432
GBAP1	827	629	891	427	421	157	688	53	128	435	1002	1296	199	37	835	427	144	211	435	160	133	60	208	58	377	155	137	193	31	63	278	58	230	142	232	256	121	184	87	51	103
SMG5	2669	3686	1697	4290	2016	3846	1950	5004	3149	4963	2848	4912	1582	5103	3688	6522	5958	887	1122	672	510	569	541	1213	1653	687	657	827	1477	845	1777	594	1034	611	937	6839	764	847	3636	561	367
FCGR2A	203	30	0	210	28	53	534	89	1808	106	133	209	20	10	376	187	276	98	4237	181	573	326	489	365	171	81	114	66	2	188	1325	31	166	72	122	78	617	0	1	278	6
PBX1	172	0	580	0	878	0	405	16	494	0	1191	0	0	0	198	0	1674	7	935	0	1417	0	367	0	825	0	108	5	1497	16	5870	0	689	24	1241	2692	98	78	90	10	3823
LOC440700	0	39	28	2	5	42	0	50	25	16	0	72	0	0	29	16	0	9	9	7	4	14	5	48	32	18	29	2	42	3	30	9	10	4	27	3	41	1	0	11	0
MROH9	0	0	0	0	0	0	0	0	0	0	0	0	2	0	0	0	0	0	0	3	0	0	0	2	0	14	0	0	0	0	0	6	0	0	2	0	0	0	2	13	0
DNM3	234	4	0	28	0	29	0	28	0	23	220	0	0	99	32	10	0	117	16	27	10	59	0	50	61	154	1749	207	122	8	203	30	47	50	179	121	38	6	17	82	53
TNFSF18	0	0	0	0	0	0	0	0	0	0	0	0	0	0	0	8	0	0	0	0	0	0	0	0	0	0	0	0	0	0	0	0	0	0	0	0	0	0	0	0	0
TNN	4	0	0	0	221	0	228	0	0	0	0	0	0	0	0	0	0	8	34	0	53	1	9	54	22	0	0	0	298	12	98	0	0	0	0	2	460	0	2	0	0
BRINP2	798	0	2084	0	3735	0	372	0	523	0	2527	0	0	358	1133	0	1012	2	2226	0	772	10	1929	0	16	0	21	2	6099	13	4991	5	18	855	14	128	2	0	0	0	38
RASAL2	38	838	48	461	0	405	0	565	302	344	134	770	0	202	0	823	0	145	0	321	38	134	424	233	127	283	128	266	106	75	231	359	14	0	117	467	27	0	12	70	185
SOAT1	2952	5542	5178	1020	1308	1616	2232	5403	5525	1569	268	6155	0	1358	1328	4745	10	2469	1956	2181	277	3376	2021	1334	1447	1383	494	1256	1407	983	1941	1317	1504	2765	2295	1256	2612	2496	2022	2001	905
ACBD6	5704	2817	4474	3180	6042	2086	4997	3723	7952	4065	4411	3309	2564	1983	6589	4269	4118	477	821	354	672	403	630	515	752	441	856	845	1645	523	1523	427	1174	1010	969	2283	1590	926	1271	262	326
RGSL1	0	0	0	0	0	0	0	0	0	0	0	0	0	0	0	0	0	0	3	0	0	0	0	4	0	0	0	1	0	0	0	2	0	0	0	0	3	0	0	2	0
SMG7	2294	4333	1549	4403	2510	2059	1723	3541	4543	4646	3537	3963	1574	3005	3591	3916	548	3191	3762	2412	1981	2279	2148	2085	4940	3053	2322	2523	6101	1419	4379	2011	1389	1930	2542	5011	3160	2677	5612	2947	3349
PTGS2	110	0	896	2	10622	16	4255	0	0	0	0	1	2	483	6099	0	4395	0	8	2	0	0	254	0	1389	2	0	17	1479	0	0	0	0	0	0	0	0	0	0	2	297
ZBTB41	582	528	80	393	29	173	199	685	406	302	14	560	0	10	0	426	136	1374	725	1392	794	1306	863	985	843	1077	742	1388	4325	631	786	1051	559	1261	839	594	1021	1172	943	878	450
NEK7	517	1869	848	1505	997	1144	1088	1042	544	925	751	1251	0	386	1191	1553	477	2513	2392	2236	1460	2464	3100	1419	1607	1146	1074	2544	5255	1130	1407	1485	1522	3755	2201	4134	2026	1637	4007	1570	960
PPP1R12B	930	707	801	1076	1160	895	570	914	1017	1024	196	571	1197	203	492	857	646	604	438	569	224	400	411	546	438	992	323	1829	1080	300	1121	291	1034	437	634	1248	407	229	634	621	189
SRGAP2	339	464	688	1043	437	585	642	809	108	1019	189	554	2	242	828	1201	618	1354	989	936	638	852	507	844	801	686	395	1797	2230	661	1019	695	753	463	1731	4261	812	907	2630	917	389
HHAT	235	360	0	300	4	486	18	315	928	553	150	127	0	233	0	357	132	339	77	256	48	252	38	267	182	159	42	673	530	304	250	127	356	374	626	625	129	117	323	318	23
BATF3	9057	78	82152	401	54197	118	49250	617	81623	185	66946	124	79351	6587	77065	1009	63499	38	16501	20	25214	52	10694	64	23432	21	21599	6	33193	67	14584	111	15527	11513	2234	6522	19324	6120	7771	32	2280
USH2A	0	0	0	0	0	0	0	0	0	0	0	0	0	0	0	0	0	1	0	2	14	0	7	10	3	0	0	0	12	4	0	0	0	0	37	27	7	6	2	46	0
ESRRG	932	0	0	0	0	0	0	0	0	0	0	0	90	0	79	0	0	19	0	0	0	2	0	0	2	69	2	0	2	4	0	0	1	22	0	2	0	0	0	2	0
EPRS	6001	6094	7661	5832	10909	3301	9375	7017	7916	3721	4327	7638	3626	3245	8482	5570	8585	8674	6090	6097	13350	5100	12310	7907	10605	4701	7830	10918	28875	2811	15539	4274	9656	19437	21227	12191	27237	24769	12565	5209	6408
DNAH14	0	27	649	0	0	0	0	14	31	4	0	0	6	35	0	0	0	29	131	9	13	10	2	23	1627	16	472	25	0	7	1	5	8	4	7	1	9	11	3	6	882
TRIM11	4018	2980	2394	1634	1441	2163	2385	4297	5149	4583	2954	3553	482	2526	3880	4619	1954	168	320	122	183	94	96	229	192	204	110	297	425	255	530	132	344	185	337	2744	321	236	1079	124	123
NUP133	2108	3441	1899	3648	2300	601	2290	2498	3272	2494	1957	2905	1024	2030	2336	3181	1866	1563	2014	1078	1108	991	1082	1132	1221	1202	999	2015	3035	628	1836	1062	1063	1735	2737	5276	3074	2782	5056	862	1099
TSNAX-DISC1	0	0	0	0	0	0	0	0	0	0	0	0	0	0	4	0	0	1	1	9	0	0	0	5	1	0	0	67	23	0	0	0	3	6	3	1	0	0	0	10	0
LINC00582	0	0	0	0	0	0	0	0	40	0	0	0	0	0	0	0	0	4	0	1	0	0	0	0	0	0	0	0	0	1	7	0	0	0	0	0	0	0	0	2	0
LYST	2050	4181	4039	6203	6460	2970	2329	4715	2296	5915	3902	3614	2293	5097	6945	4295	1283	8443	7230	9279	6925	5220	6222	5469	6427	10545	5876	11970	55191	4006	9816	3564	6515	15907	712	463	2562	199	389	6465	2466
MTR	1524	2153	1003	1457	3906	1823	817	2060	1488	810	708	2912	1844	2783	1918	1864	1726	3493	3419	2414	2489	2395	3438	3092	2336	2113	3307	3891	8872	1849	4670	1463	1956	4043	2255	2208	4541	660	1900	2461	1438
LOC100130331	314	576	118	250	241	156	122	342	538	198	402	380	208	92	202	238	84	2	24	6	14	4	0	10	14	2	0	30	54	0	7	2	0	2	13	48	21	14	26	4	0
RGS7	229	0	0	106	0	0	0	10	0	324	311	0	0	0	0	142	0	56	2	1	0	0	0	10	0	2	0	69	29	0	0	12	0	0	0	23	0	0	6	40	0
KIF26B	146	0	0	0	4	0	0	0	23	0	0	0	0	0	0	7	0	0	0	0	0	5	0	11	39	4	0	1	0	5	11	3	3	0	47	53	0	0	0	4	0
SMYD3	4148	966	2948	1424	3144	1664	1732	2195	2464	2114	1497	1954	0	1146	2284	1808	1929	576	735	679	867	638	849	858	1138	652	577	1001	1751	449	1613	664	1005	1858	1811	907	1849	897	358	695	253
ZNF496	2234	457	1529	1098	1048	2102	637	1551	2728	1578	2301	1815	68	1175	8869	2923	3368	195	823	195	509	140	564	341	1095	133	184	186	891	178	2465	141	195	652	1172	6121	656	357	1606	190	601
OR14C36	0	0	0	0	0	0	0	0	0	0	0	0	0	0	0	0	0	0	0	0	0	0	0	0	0	0	0	0	0	0	0	0	0	0	0	0	0	0	0	0	0
LINC01128	254	419	520	813	724	632	414	334	463	890	737	653	534	93	530	833	258	645	534	299	596	410	544	400	215	386	152	435	457	254	682	462	352	623	1148	1000	444	420	273	341	49
FAM132A	195	0	136	40	69	22	0	0	2	48	2	0	0	0	0	0	4	2	0	2	0	0	4	0	2	0	12	0	0	4	10	0	12	0	10	57	4	0	3	0	0
AURKAIP1	18184	9143	27903	5286	10243	8084	17576	12619	17028	11132	19500	10645	26744	9832	12785	12295	12486	253	890	209	411	165	580	562	448	324	1527	422	605	580	1040	134	821	880	1446	5732	625	1304	2203	154	78
CDK11B	1486	1194	793	1650	689	1828	589	1626	860	2090	1038	1702	2251	2426	841	1370	1440	547	638	784	600	273	205	1009	437	453	356	560	257	894	457	145	236	181	277	2434	118	259	1034	322	48
NADK	2728	6890	831	4279	1514	5413	2929	8257	4593	6312	2609	7650	2123	4145	2679	8088	827	520	227	469	167	681	154	1007	276	677	53	413	305	488	345	586	205	273	264	2869	219	322	1769	541	56
SKI	0	72	330	258	112	115	24	186	26	647	4	178	0	70	0	208	16	131	200	127	92	134	29	280	90	486	6	362	20	502	78	26	76	174	186	3517	96	130	1188	82	18
TNFRSF14	10208	13227	6817	8604	2870	12034	8229	12270	6019	12339	8671	16046	7875	21884	10632	20389	7347	762	825	450	136	704	199	1596	547	961	113	1931	1707	1137	1114	366	705	453	237	1635	330	419	1824	238	182
TTC34	22	0	31	9	0	22	0	0	0	0	0	0	0	0	0	6	0	0	0	0	0	0	0	0	0	2	15	0	0	0	0	0	0	0	0	6	0	0	1	0	0
MEGF6	170	1700	4	1433	0	2765	0	2146	0	5214	0	2914	0	902	0	4361	0	227	18	164	0	199	0	221	12	175	0	294	0	220	22	271	6	0	881	662	0	4	0	302	0
CCDC27	0	0	0	0	0	0	26	30	0	0	0	0	0	0	0	0	0	3	4	1	0	9	0	22	0	0	0	0	0	8	5	0	9	2	0	2	5	4	1	0	0
DFFB	869	591	154	405	815	370	436	1186	332	756	330	540	0	62	0	1233	0	393	105	209	105	215	185	407	77	422	4	555	112	128	235	150	66	229	30	176	164	132	156	235	188
AJAP1	913	0	0	0	0	0	0	0	0	0	0	0	0	0	0	0	0	0	0	0	2	0	0	0	0	0	0	0	0	0	2	0	0	0	0	0	0	0	0	0	0
NPHP4	1412	245	0	44	103	0	404	373	422	908	1300	309	100	35	0	211	0	60	299	30	17	42	32	40	147	64	7	54	4	61	36	24	45	292	83	1393	85	50	219	64	16
KCNAB2	3493	2439	265	1988	2658	4580	1635	3288	816	3754	552	4691	10	3407	23	4796	1025	663	504	683	104	666	7	1085	167	674	126	1368	244	1391	96	525	768	702	123	1382	772	988	3583	326	6
ACOT7	13175	393	9768	308	11849	426	9530	1462	12373	33	11887	208	8218	173	5884	523	7970	64	1500	22	1428	62	1885	63	1213	80	1468	38	3308	112	2701	49	1066	2304	3426	8625	2899	2802	1677	16	142
PLEKHG5	0	0	0	0	0	0	4	17	275	0	0	0	392	0	0	0	0	0	18	3	0	2	0	0	0	32	0	1	54	0	7	0	0	65	0	66	11	11	16	0	0
PER3	130	152	0	106	111	396	20	37	100	405	169	90	2032	37	236	365	0	446	519	306	4	237	428	166	132	305	327	291	731	61	340	46	68	96	41	143	47	75	82	172	0
TNFRSF9	5689	2	13038	374	29943	108	10186	4	44032	70	4928	4	14221	680	18413	188	18328	39	38864	8	13585	80	11501	8	1986	6	10845	0	32005	90	19053	36	5345	28208	4236	2487	1908	1298	843	2	393
RERE	1019	4850	294	5800	925	5142	751	5107	939	5771	857	4208	486	4528	590	4738	812	3852	1608	2588	1163	2520	159	2515	414	3061	1152	4409	2054	2645	2757	2666	735	866	791	3541	356	237	716	2885	447
GPR157	449	169	0	0	0	127	22	95	0	227	0	0	0	0	67	115	0	17	3	0	2	20	0	0	0	0	0	0	0	12	0	0	5	20	3	25	6	2	4	3	0
H6PD	2437	1862	608	2682	1510	918	485	3196	489	1795	593	1151	110	1052	1580	2866	2222	1455	1848	625	704	1043	1046	1318	1008	880	492	2295	4847	1124	2069	1148	717	2643	175	1617	615	86	1094	777	160
CLSTN1	2364	2329	504	2071	811	2427	971	2203	954	4129	814	2983	572	3450	1652	4261	495	859	460	493	315	483	465	1375	666	611	181	1109	1297	648	1360	358	562	1281	769	11798	253	599	3221	595	96
CTNNBIP1	1443	404	0	358	346	152	176	646	1075	676	50	489	353	215	535	867	0	99	93	80	59	140	42	154	491	147	139	140	951	151	130	106	351	239	194	1827	178	54	208	71	6
UBE4B	1056	594	471	1321	879	638	338	929	608	894	545	551	403	807	759	666	14	1723	1810	739	1287	897	793	1513	2183	1094	1242	1483	2546	533	1021	543	494	1065	1684	3530	1048	1870	4814	892	736
KIF1B	665	286	412	364	1588	312	1315	568	55	552	414	208	240	373	1449	441	707	441	2469	359	1137	299	2401	450	3105	445	2302	858	10083	264	5853	252	2005	3016	1428	2272	1333	3464	5384	522	874
PEX14	572	529	239	350	188	293	591	624	1151	593	751	546	468	286	504	597	613	180	329	196	216	118	146	261	407	137	204	99	533	204	150	50	367	252	329	1788	243	144	435	110	24
CASZ1	400	217	1699	616	969	1008	1126	537	1529	1758	2271	355	2846	446	1964	422	993	220	1778	71	694	124	228	235	1489	163	741	177	1464	170	1775	100	792	707	144	788	90	20	130	66	99
C1orf127	0	0	0	0	0	0	0	0	0	0	0	0	0	0	0	0	0	6	7	0	0	0	0	0	0	0	16	0	0	0	12	0	0	0	0	0	2	0	44	0	0
EXOSC10	6503	10784	6375	7159	5996	7114	5461	10558	8373	8844	13429	10888	7452	8276	11077	9245	3978	4401	5758	4484	3706	3554	3302	4213	9856	2862	2790	7071	12089	1485	8615	2808	2476	5618	6068	6093	4420	12094	5820	3928	1032
MTOR	1046	1019	814	1438	1291	1085	1022	1134	575	716	651	1367	208	650	519	2330	1398	2181	3248	1424	2229	1452	1526	1805	7034	1367	1313	3802	4049	795	2634	848	1076	1413	3287	6668	1006	2869	5401	1021	535
AGTRAP	3024	3149	1962	2084	1340	1269	1006	2237	1544	2263	1278	1993	10	2013	829	3404	938	453	506	685	276	711	22	582	799	353	116	672	84	563	622	662	251	286	568	717	486	399	100	490	8
MFN2	3730	3207	1292	2114	1724	988	3574	3465	2736	3683	3652	2169	508	2324	3548	3919	3380	1030	2515	942	1884	884	876	1195	6489	745	1433	1929	3277	724	2385	758	1205	10672	1938	6856	1141	3509	10285	956	351
TNFRSF8	6727	4	20725	4	21277	2	38870	326	35397	2	18130	2	24836	2627	21706	60	23307	14	6109	2	2908	10	2120	18	23785	8	3923	0	7428	30	8835	8	4306	6609	687	5204	286	2795	10333	2	1683
VPS13D	795	2157	0	3243	585	2407	158	3826	910	2785	82	4196	2	1674	97	3615	318	3195	1660	3048	873	2646	606	2956	3431	3264	548	8924	2982	1727	1657	909	576	790	791	1557	586	779	2045	3436	261
AADACL4	0	0	0	0	0	0	0	0	0	0	0	0	0	0	0	0	0	0	0	0	0	0	0	0	0	0	0	0	0	0	0	0	0	0	0	0	0	0	0	0	0
KAZN	476	0	340	0	1688	0	2018	0	75	0	1221	15	1333	449	1877	78	445	2	221	0	64	2	129	0	2171	0	86	2	1507	2	267	1	82	32	975	3473	0	40	219	6	4
TMEM51-AS1	62	0	0	0	0	0	0	0	0	0	0	0	0	0	0	0	0	0	0	0	0	0	0	0	26	0	0	0	0	0	1	0	0	0	0	2	0	0	0	0	0
FHAD1	628	0	2172	0	0	0	129	0	0	0	0	0	0	0	0	16	1269	2	8	0	2	0	8	5	2995	2	134	1	2586	4	840	0	1	1300	1577	1736	239	1747	2160	0	0
DNAJC16	688	495	260	666	316	1108	46	512	28	725	0	861	0	1015	159	704	86	2833	1115	1726	1020	2518	389	1959	3595	2725	1728	3673	5223	1696	1094	1907	743	1944	1272	803	838	965	663	1839	342
SPEN	3445	7921	1991	8454	4095	9647	1735	10447	1401	7975	1859	11680	3443	6182	1547	10487	408	6013	2958	5761	2552	3391	2050	6189	7653	8915	3411	15268	12070	3537	6131	1378	1254	3001	2592	5400	1191	2385	5126	5648	2298
FBXO42	3814	3914	1347	4045	2124	2615	913	3116	2158	4879	1679	5627	490	2180	3113	3891	1837	1608	1006	1381	798	1113	630	1272	2438	1148	771	780	1871	808	1485	766	492	1568	977	1751	872	901	1002	1234	309
NBPF1	944	825	108	1085	74	562	8	760	797	465	27	1422	0	615	263	1491	367	884	197	814	20	744	49	918	1651	538	334	1051	224	697	575	405	124	1008	563	1170	330	461	321	982	86
ESPNP	4	0	0	0	0	68	0	0	0	0	0	7	0	13	0	81	0	0	0	3	0	0	0	0	0	0	0	0	0	0	0	0	0	0	0	0	0	0	0	0	0
MFAP2	2	0	0	0	0	0	0	0	0	0	0	0	0	0	0	0	0	0	0	0	0	0	0	0	42	0	0	0	0	2	0	0	0	0	0	0	0	0	0	0	0
PADI2	0	0	0	0	118	0	98	4	442	0	0	0	16	0	382	157	0	1	90	0	0	4	0	1	259	0	50	4	4	17	0	0	53	19	20	8	50	4	11	0	0
PADI1	0	0	0	0	0	0	0	0	0	0	0	0	0	0	0	0	0	0	0	0	0	0	0	0	0	0	0	0	0	0	0	0	0	0	0	0	0	0	0	0	0
ARHGEF10L	1676	0	0	0	0	0	0	68	0	165	0	6	0	0	0	302	0	2	2	2	0	2	0	11	30	0	0	46	0	0	9	0	0	2	0	28	2	0	2	7	0
ACTL8	0	0	348	0	0	0	0	0	0	0	0	0	1204	0	0	0	0	4	8	0	46	1	0	0	51	0	0	0	0	14	4817	0	4	4	47	2	0	0	0	0	2
IGSF21	0	0	0	0	0	0	0	0	0	0	0	0	0	0	0	0	0	0	0	0	0	0	0	0	0	0	0	0	2	0	0	0	0	0	0	0	0	0	0	0	0
PAX7	0	0	0	0	0	0	0	0	0	0	0	0	0	0	0	0	0	0	0	5	0	0	0	0	0	0	0	0	0	0	0	0	0	0	0	0	0	0	0	0	0
IFFO2	1252	268	968	539	3070	785	2658	576	4475	2160	1606	499	3407	1669	2107	476	1996	105	957	94	550	69	353	55	441	262	129	107	1241	148	880	128	700	609	282	2477	196	166	1397	116	86
UBR4	5518	4095	2089	3961	4490	4209	3212	4234	3560	4501	3161	2801	3175	4985	3791	3805	3423	4951	10013	5015	6267	3833	3916	4136	5619	4028	3480	8272	17888	2002	9662	1823	3515	4010	4118	5850	3471	5805	9330	4980	4151
CAPZB	35725	25881	10882	19878	14239	18744	16400	22507	14881	16458	18766	17579	5624	12134	12147	22233	4901	5865	7028	5626	7311	4544	4351	5090	3667	3032	3860	5835	12145	4313	10247	3293	3847	4457	4362	14684	2578	4473	7347	3314	1139
TMCO4	2818	1582	1028	1743	426	2119	1109	3102	1559	2972	1365	3620	1647	2383	1326	2882	452	419	568	248	199	255	238	503	376	219	177	605	929	379	687	243	341	289	178	1049	383	198	443	369	44
LINC01141	0	0	0	0	0	0	0	0	0	22	0	0	0	0	0	0	0	2	0	0	0	0	0	2	0	0	0	1	0	0	0	0	0	0	0	0	0	0	0	1	0
HP1BP3	14650	6330	3693	7974	6823	5964	5452	8416	4580	7684	3474	9825	4501	5249	11623	10163	3547	7808	8966	7514	5119	7652	3765	7772	7259	6467	5454	10924	23494	3689	8064	5160	3890	17796	9199	8474	7959	10576	10256	6955	2047
EIF4G3	2056	5873	589	7969	4874	5013	2810	3811	1233	4921	2055	5508	1156	1797	1688	5532	3218	7383	3767	4892	3285	4125	1860	5229	3040	4560	2571	14466	11728	2937	2894	3896	2059	3663	2242	3483	2398	3632	4533	4794	1852
ECE1	2617	8936	2370	2403	2144	4940	2408	6555	2686	7733	4431	7229	4322	5487	3199	7392	2860	662	1799	591	660	633	270	1240	1992	789	300	2205	2183	848	1974	400	535	526	248	3622	167	215	1765	538	365
ALPL	96	759	0	410	0	1634	0	335	12	1023	0	2104	0	310	0	702	0	64	2	38	28	68	0	84	4	24	0	9	0	131	8	33	0	0	0	0	0	0	0	66	0
LDLRAD2	32	0	0	12	0	0	0	0	0	54	57	14	0	140	0	33	0	2	4	5	0	1	0	21	0	0	0	13	0	7	0	2	0	0	0	2	0	0	0	5	0
HSPG2	45	0	0	0	0	31	157	0	0	0	0	0	0	230	0	42	0	9	91	5	37	3	0	62	0	0	35	13	8	0	116	0	0	1	2	46	2	0	7	5	0
CDC42	9198	10562	5318	6518	5160	5049	5908	10753	12588	14502	11331	6750	2812	4454	6044	4171	2005	29166	67627	10696	13556	35591	13905	19519	28671	31015	36373	29243	89103	11106	22776	35138	21961	28820	21753	11966	25536	89356	14994	11783	8760
ZBTB40	372	2480	18	2115	684	2302	1597	2726	558	2315	994	1139	239	1814	310	3879	1828	3535	2056	2869	994	2323	743	3586	1196	2920	214	6006	2088	1304	2442	793	599	931	785	1359	953	876	1437	3281	517
LUZP1	3026	1254	124	2678	592	2672	463	2100	908	2750	658	2737	0	1609	1852	1864	756	1114	986	900	952	438	224	736	1575	888	536	725	2198	616	894	674	420	673	947	1520	630	363	479	1168	138
TCEA3	47	0	0	0	0	0	0	0	30	0	0	0	0	0	0	144	0	0	25	0	2	3	0	2	30	0	27	0	122	0	2	0	2	6	0	0	8	21	4	0	0
E2F2	352	109	0	2	2	0	34	275	30	36	75	2	0	0	0	125	0	50	140	15	24	117	17	4	259	30	0	2	138	32	26	0	2	274	0	2	298	484	1114	8	2
IFNLR1	18	2633	0	799	0	576	0	707	53	462	0	646	0	798	0	2574	6	577	121	562	0	633	14	257	20	364	68	719	4	714	113	315	151	104	183	563	2	12	53	311	2
NIPAL3	1667	2933	572	2030	1140	1986	475	2592	908	1814	223	2443	1126	1890	1404	2648	612	4946	3107	2540	1111	4019	274	3342	1322	1976	1865	1962	4000	1511	644	2939	856	3063	2048	1128	1400	763	687	2160	336
NCMAP	0	0	0	0	0	0	0	0	0	4	0	0	0	1	0	0	0	0	0	0	0	2	0	0	0	0	0	7	2	0	0	0	0	0	0	0	0	0	0	0	0
RHCE	91	4	39	4	10	2	40	2	0	9	0	1	0	0	0	0	0	15	7	4	55	0	0	0	5	5	0	1	30	4	16	2	15	31	0	8	18	1	3	3	8
TMEM57	1106	1510	702	1613	1786	1277	677	1348	1180	2219	1850	2042	1047	580	1083	1644	1495	1047	1523	576	1356	524	696	820	383	1257	2082	1194	3000	799	1136	725	978	438	361	813	406	476	1312	506	428
MAN1C1	1953	6	0	0	6	3	0	0	162	0	252	144	0	0	0	37	749	20	180	18	6	12	8	6	24	48	0	1	10	16	108	0	76	263	0	2	0	14	26	2	0
SH3BGRL3	72981	71948	9918	78177	20975	62893	16778	83042	30621	74189	20551	80707	13616	38655	12414	64616	4612	19343	15904	30427	9676	24819	4446	26716	7287	26550	6828	33641	21304	35834	14527	22824	9802	6816	4816	4414	3751	7326	1274	26414	488
LIN28A	0	0	0	0	0	0	0	0	0	0	0	0	0	0	0	0	0	21	0	0	0	7	0	18	14	0	0	4	0	0	0	0	12	0	0	5	0	0	0	0	0
RPS6KA1	11787	17587	10184	11727	12842	9164	10818	18565	24183	14949	42256	17407	17639	8669	27377	21040	9628	1555	2926	1717	2598	1923	1309	2556	2808	983	1115	2117	5084	1210	3637	669	1059	1052	1275	6680	1944	1807	3386	1179	376
TMEM222	5437	5724	3977	4801	1956	5283	3576	8893	3056	7661	5190	7477	1714	3191	4273	8840	2	1787	1102	2044	720	2129	882	1791	1579	1389	587	2409	4162	1721	1678	2088	747	1554	1265	2031	1313	1806	599	1612	163
WASF2	3797	6408	1976	7341	4629	5660	1817	7188	3368	7785	2293	8559	3592	4380	3595	6568	1664	5224	3739	5131	2706	6201	1303	5541	2609	3646	1758	4718	7937	3977	3154	2696	1826	3047	2741	8154	1358	3625	7859	3205	335
AHDC1	126	198	70	270	24	166	18	201	101	179	0	161	0	66	80	272	62	75	43	58	13	71	16	85	10	83	0	172	6	225	63	116	60	54	146	1752	28	58	224	31	6
PHACTR4	786	1981	134	1971	1252	1856	1606	1726	1216	2658	638	2642	1160	1873	731	2408	124	1919	2481	1590	1154	1864	1003	2107	1983	1364	1214	2656	3818	927	2152	863	1001	1867	1651	2659	1048	2129	2252	1120	487
SNHG3	1935	2874	11530	5479	3661	4622	2060	4222	1052	4975	4201	3555	5019	3753	2533	5215	3058	5937	6492	5043	5278	4397	4647	6519	3771	5633	10058	9441	5042	1651	6755	3275	5972	4950	6581	10792	3180	4248	2326	3650	662
RCC1	2653	1987	4603	1272	2610	899	3977	2952	8991	1491	4363	1429	1488	430	2218	2042	2242	937	863	432	1239	370	1247	503	1629	406	743	159	221	268	1582	201	792	1165	3254	10529	2545	4094	5310	446	485
TAF12	4540	3797	2460	5082	1085	2301	1760	4794	1438	3007	1650	5672	1310	2826	1156	4394	798	2051	2137	2228	1482	1722	1139	1899	1077	2406	1619	2274	4695	1752	979	2951	1519	2300	4248	2696	2560	3347	841	1960	214
SRSF4	5666	9955	3437	8557	6705	6120	5932	8452	7993	9231	4639	7929	4360	5370	7595	11525	4726	1175	1648	864	976	1058	587	1833	823	1521	1674	2754	2886	1176	1847	1028	1331	1778	1676	8312	928	1876	4549	1007	840
PTPRU	0	0	0	0	8	0	0	0	0	4	0	0	0	0	0	46	0	0	55	2	0	3	18	0	0	0	2	0	0	3	52	0	94	20	12	185	13	2	20	0	0
MATN1	0	10	0	96	56	103	160	137	103	244	2	110	0	207	0	55	2	121	27	29	36	22	0	47	21	81	0	8	0	56	7	65	9	4	0	34	10	6	10	10	0
MATN1-AS1	209	640	395	925	110	1306	193	1197	231	1748	0	843	0	1141	0	1217	504	316	83	182	8	169	30	227	12	251	23	407	152	189	36	138	23	40	0	13	14	6	32	140	2
PTP4A2	36223	21863	6936	24522	9278	21855	11358	24209	11113	37949	11819	23111	10504	7735	9583	27303	5913	5940	7703	3521	2122	8048	3905	7620	3941	8668	6279	7221	13730	6720	12686	6002	5472	21866	16330	13008	4062	17198	13821	3538	3333
KPNA6	1351	2939	962	2207	2503	967	1230	2561	1145	3155	1305	3359	4336	2114	1246	3177	666	7584	9659	6015	6455	6716	2931	5273	6206	5199	5960	5072	19776	3860	5109	4241	3296	7988	5759	4394	37	10564	4394	4428	2432
HDAC1	6895	14365	4094	10821	9746	5492	9512	11029	6819	7636	7092	12791	140	4057	6710	15269	4577	11751	9328	7459	5427	8077	5636	5518	6989	5448	3502	5978	11415	3229	7303	5775	3277	6364	4482	7791	6384	15380	8501	5787	959
ZBTB8A	178	8	1	38	0	222	176	55	107	0	0	28	886	7	236	0	0	50	136	8	24	20	4	105	258	158	26	27	201	26	375	2	93	180	73	155	162	257	437	10	3
SYNC	0	0	0	0	0	0	42	0	0	0	0	0	0	0	0	0	0	0	0	0	0	4	0	0	0	0	0	0	0	0	0	2	0	27	0	0	9	4	2	0	0
S100PBP	665	1670	434	1529	2183	1277	753	2660	1438	1418	623	1694	4	2316	999	3088	28	3078	3955	2302	1921	2824	1911	1920	1852	1656	1201	3861	3243	1443	2642	1668	1400	2003	2344	1599	1965	2287	1589	2047	691
RNF19B	5510	216	2470	266	3943	299	5086	266	4031	641	8465	428	3045	518	2937	622	2189	409	9209	245	3763	222	1872	354	407	510	2368	462	3299	256	3284	720	1776	1101	252	1789	1075	2060	5742	367	389
PHC2	5254	4472	1315	1267	533	1307	375	2853	638	5515	3946	3835	1652	3068	2639	2929	356	222	153	301	144	143	119	168	207	205	10	250	195	267	274	209	165	261	386	4343	215	152	730	275	124
LOC101929464	46	0	36	0	17	0	55	0	6	0	15	0	0	0	61	0	0	0	0	0	18	1	0	15	9	0	0	0	0	0	3	0	4	8	18	3	9	0	0	2	0
ZSCAN20	100	282	0	10	8	0	18	194	0	174	282	32	584	0	12	6	0	24	36	46	110	50	146	99	190	0	96	187	87	65	87	0	58	0	270	256	126	142	200	24	106
CSMD2-AS1	0	0	0	0	0	0	0	0	0	0	0	0	0	0	0	0	0	0	0	2	0	0	0	0	0	0	0	0	0	0	0	0	0	0	0	0	0	0	0	0	0
DLGAP3	254	47	0	139	469	109	76	265	336	435	106	210	14	50	24	286	86	4	12	1	7	8	0	14	0	6	30	15	0	6	11	2	20	3	17	606	3	0	5	1	0
ZMYM4	2212	2573	655	3462	1989	2105	1079	3545	356	1629	1180	2462	782	1045	1322	2713	396	2224	1995	1396	1134	1884	1035	1956	1191	1940	1066	1674	4105	1048	2227	1237	961	1910	1229	1925	2297	1315	2474	1489	952
KIAA0319L	12431	3314	899	1685	1899	4818	1762	4546	507	1776	2395	2890	1786	2011	151	4317	1119	1676	2368	1189	1130	1333	518	1884	1163	659	650	2749	4149	979	926	581	745	1156	868	2546	581	728	1835	1052	629
TFAP2E	304	134	0	193	4	116	15	296	13	498	0	296	900	212	0	340	28	73	82	18	8	49	4	35	1	33	0	162	211	22	8	40	18	19	5	49	17	11	11	70	5
AGO4	541	834	548	554	258	685	52	1134	477	1380	173	175	1021	465	407	2132	4	1476	655	1210	142	983	160	505	452	754	0	1467	1557	855	657	869	417	1004	289	620	231	152	663	593	87
AGO3	1673	1310	367	1003	782	570	1057	1227	1267	1190	1233	1527	0	430	463	1312	1930	917	704	653	419	568	229	727	432	1131	265	1385	805	396	417	382	419	479	399	313	700	890	715	756	198
COL8A2	0	38	0	0	0	14	0	0	0	0	0	0	0	0	0	226	0	13	8	18	0	32	0	32	2	41	0	2	0	10	2	0	0	0	12	147	12	8	20	17	0
STK40	2188	6008	196	3902	1782	2149	2514	7094	1643	4476	2159	6809	2514	4820	415	7192	1213	700	442	530	214	540	90	482	146	329	58	660	217	555	289	688	207	329	271	3074	144	168	969	328	68
GRIK3	0	0	0	0	0	18	0	0	0	0	0	0	0	0	0	0	0	0	0	1	0	7	0	9	0	0	0	4	2	0	0	0	0	0	0	0	0	0	0	37	0
SNIP1	229	631	2	640	245	342	481	472	453	2343	362	248	456	978	653	478	390	1374	634	564	284	520	162	673	254	1011	783	815	802	228	378	439	243	644	431	883	374	496	631	400	182
YRDC	4029	2400	8530	2785	5316	940	6067	3051	9296	4318	5325	2471	3587	1569	7942	1523	1761	357	897	258	736	165	447	214	293	112	714	135	718	288	406	445	483	573	767	2706	513	682	1052	227	189
INPP5B	1018	2279	124	966	610	2195	873	1222	430	992	306	2592	56	1144	522	2841	204	4170	2043	2783	1288	4767	1157	2659	1379	2572	937	3680	2447	2185	1766	1945	1095	2581	1589	1711	567	905	1075	2396	419
RRAGC	828	997	406	1318	1213	840	1564	1340	1090	2058	660	1353	438	688	1060	1610	848	1516	2552	1192	1175	923	865	995	1931	1352	1228	1289	3820	799	1755	2961	1468	2037	960	1565	813	578	1123	1253	1783
BMP8A	88	72	0	109	0	28	0	241	25	46	18	100	10	361	0	167	4	277	85	110	0	165	37	44	30	79	2	202	307	126	12	8	10	68	208	498	4	13	15	47	4
BMP8B	16	0	2	8	2	30	2	0	56	30	26	2	142	82	31	15	604	25	194	21	31	66	44	36	82	75	0	52	47	25	13	8	66	43	4	161	2	5	57	120	0
RLF	2972	2219	526	4958	2149	2959	2639	5968	2341	9588	2424	4649	0	804	961	2635	838	3036	2469	2279	997	1690	1021	2608	1043	2636	1090	5768	4995	1110	1551	1518	748	1072	552	1150	557	1389	2195	1760	329
NFYC-AS1	154	580	702	290	305	842	479	374	195	338	328	576	19	1318	376	632	28	56	50	52	11	16	61	186	82	287	346	166	322	10	132	65	64	136	55	55	31	63	101	35	0
KCNQ4	463	0	0	0	116	0	0	3	0	0	0	14	0	0	0	118	0	4	0	3	6	4	2	0	0	0	0	0	0	1	2	0	0	4	0	8	2	4	2	16	0
SCMH1	833	817	729	1365	0	657	646	1170	1090	1389	357	646	1309	1073	779	1079	0	493	307	374	173	510	2	499	390	383	339	549	223	283	163	300	235	807	1106	2711	91	246	750	410	19
HIVEP3	895	1131	1056	1641	5016	1471	1739	1461	1825	1171	668	772	1545	1442	1787	1328	1018	681	1583	502	2529	1127	2439	921	1011	420	865	1437	4412	343	1192	468	606	1461	105	583	1736	371	4232	578	871
FOXJ3	837	1526	380	2734	1162	1598	315	2156	732	1916	738	1523	138	2561	904	1384	170	2789	1810	1759	723	1835	613	1525	1146	1528	1150	1974	3570	1303	1483	1698	998	1515	1986	2813	1434	2742	2665	1815	757
RIMKLA	210	0	282	0	993	1	384	0	366	0	572	0	0	0	410	0	0	0	139	0	0	1	20	0	231	0	88	0	417	6	114	0	183	661	395	539	406	138	564	0	8
TMEM269	37	0	0	1	0	0	0	0	0	0	10	0	0	0	0	1	0	20	33	8	15	5	4	4	0	17	0	0	5	12	16	0	6	18	0	18	8	9	4	0	15
CFAP57	321	180	524	0	659	0	1446	12	5480	0	2562	0	0	194	1371	59	0	18	7570	33	6493	38	596	8	3182	82	2766	2	14656	26	3785	2	1948	1974	75	50	5	8743	5119	7	1103
TIE1	0	0	0	0	0	0	0	0	174	0	14	0	0	0	0	0	0	6	1	0	0	0	2	2	6	0	1	0	0	0	45	0	8	0	0	0	2	0	0	0	0
SZT2	1027	1017	302	1645	215	1567	205	1406	151	2537	208	1670	116	2027	61	2089	574	1308	1894	1053	907	1441	232	1318	1530	772	481	1622	1416	1125	715	299	303	419	363	1401	174	288	1287	997	69
KDM4A-AS1	170	2	128	42	0	48	114	48	42	37	95	134	0	2	0	38	402	132	49	74	87	85	36	99	57	48	40	7	199	37	77	14	36	131	131	39	277	226	51	88	24
ST3GAL3	588	250	6	736	267	254	126	923	351	252	384	912	102	403	252	256	42	163	99	21	81	124	35	178	84	26	2	35	250	61	129	139	29	91	41	497	41	48	135	100	24
IPO13	872	2564	534	1199	517	1363	1641	1269	2399	1112	615	1644	1336	624	2108	3403	1082	366	907	304	385	180	423	356	263	59	358	646	1043	203	498	122	201	519	475	2222	258	499	1181	204	272
ERI3	7865	3346	5582	3240	5281	2745	4111	4460	4582	4127	7294	4772	3766	3007	5707	3380	2742	1532	2109	913	2548	1460	824	1755	2638	1459	2937	1412	4641	951	2107	1986	1049	3604	3574	3949	3477	2393	1333	918	384
ERI3-IT1	18	25	19	0	12	0	0	16	0	25	17	4	0	0	2	11	0	15	7	10	1	19	14	16	5	9	15	34	78	8	22	20	6	6	2	20	16	1	9	17	12
KIF2C	6203	588	4986	277	4756	242	7747	1750	10416	21	5230	0	0	639	3716	496	1432	156	3667	81	1445	153	1226	147	2670	67	2562	211	3682	111	2729	30	1128	3317	2683	4380	2979	4655	5077	29	513
EIF2B3	5852	2678	3726	2828	5879	1783	4627	2830	4039	2339	6951	2037	5313	2713	4969	3014	3627	1859	4415	1574	3059	1449	2574	2034	2155	1759	4647	2425	5396	1065	3968	1283	1809	2944	3435	1635	3988	4071	1043	1337	684
ZSWIM5	208	2	454	103	323	0	395	4	391	81	291	0	852	68	593	11	34	22	1297	36	883	23	33	71	471	18	985	4	2093	18	919	84	506	180	57	539	123	0	39	52	26
TESK2	436	1986	83	685	32	791	307	982	237	3984	82	1005	528	565	122	1074	36	789	256	663	328	629	113	660	192	606	110	743	904	533	105	360	159	208	302	473	131	148	458	743	237
MAST2	806	507	976	489	1007	78	564	1611	1022	429	766	580	0	1406	328	680	285	101	222	75	98	126	170	149	362	100	135	293	403	113	398	71	281	417	264	2821	181	272	1215	98	132
PIK3R3	688	0	30	0	182	10	144	6	54	0	4	0	65	0	56	114	0	37	236	13	138	45	307	54	1153	0	717	6	451	2	506	0	358	608	943	2052	255	1040	738	31	50
POMGNT1	8993	2855	3724	1722	2365	2121	4674	3632	6211	5220	6986	2949	4875	2408	8251	3722	2667	407	580	192	261	337	399	407	641	272	785	484	2667	206	672	207	447	890	879	4738	382	772	1672	152	87
MKNK1	2194	3031	524	3114	1327	2827	1159	4072	1122	1711	711	2951	0	3333	1123	3800	1422	2865	884	1610	286	1535	727	1851	604	2253	549	2358	1858	1284	813	1365	528	1777	742	1270	457	1134	791	953	124
CYP4Z2P	10	0	759	18	918	0	367	5	748	0	731	0	1252	49	1256	0	163	0	202	0	113	2	367	2	102	0	285	0	438	0	170	0	4	160	1	0	150	197	59	0	0
CYP4X1	0	0	20	0	74	0	75	0	16	0	0	0	0	0	0	0	0	0	75	0	156	0	123	0	2	0	584	0	320	0	6	0	0	119	109	79	39	26	46	0	0
CYP4Z1	246	2	15912	149	14388	4	7862	149	20581	0	10475	12	36077	1781	28131	0	4275	17	11959	0	7076	33	19502	11	7634	9	14229	6	41358	27	11857	24	193	6959	9	0	7999	10032	12910	5	25
CMPK1	6695	11847	7400	11957	8919	6669	7690	13623	10684	15573	14976	12478	5214	3085	8648	11810	4622	3248	6681	2114	3101	3944	4097	2763	3872	2943	7226	3652	25444	2375	8731	3816	2450	17033	5228	7302	5513	13270	10234	2889	2995
SKINT1L	0	0	0	0	7	0	35	0	12	0	0	0	0	0	0	0	0	0	81	0	3	0	5	0	0	1	147	0	55	0	6	0	0	6	0	0	5	0	0	0	0
SPATA6	184	138	50	177	2	162	116	113	543	154	819	318	0	579	0	81	0	100	294	29	160	51	9	68	279	40	171	417	1360	47	89	0	46	122	14	19	102	13	63	91	62
ELAVL4	0	0	0	0	0	0	0	0	0	0	0	0	0	0	0	0	0	0	20	0	0	0	0	0	0	70	118	4	4	0	32	0	0	0	0	4	86	0	0	0	0
TTC39A	4936	0	5357	0	6998	0	5832	0	10761	19	17274	6	7663	625	8613	0	4178	18	10843	5	6595	36	6816	20	3809	12	7385	0	10399	37	7748	11	2542	9516	4416	2092	5286	42375	12914	14	1246
EPS15	4696	5113	2631	3543	3890	2408	2155	6649	3005	2390	4770	3368	1304	3365	3661	5413	1416	12664	19607	7050	5750	11715	11389	7154	8361	7611	10641	10240	51325	4727	6509	5624	6979	10833	9107	5356	4176	14620	9484	6784	13439
OSBPL9	9720	6371	5954	4335	6909	2261	5094	5986	8360	3917	4886	5284	242	3057	4967	7041	2784	2583	4817	1877	1482	1938	2096	1751	2143	1217	2808	2385	5662	1179	3282	1001	2019	3315	2686	5731	2186	3521	4576	1061	6311
NRDC	8132	9112	4162	10399	7357	6006	5509	8726	5999	6778	4469	8713	6791	10119	6004	8619	6294	8287	8184	5900	4040	5027	4355	6519	6931	3646	6700	9141	17714	3210	8920	3887	1989	8837	6481	7406	8001	10255	5944	4822	4044
ZFYVE9	445	0	0	0	124	173	16	8	407	0	398	34	0	0	68	18	0	29	9	14	0	10	0	72	78	76	10	6	5	29	36	9	63	4	179	942	2	7	232	42	54
CC2D1B	1256	1273	696	1194	1108	786	484	1896	1073	1356	1253	1833	0	1076	383	2206	424	636	674	511	144	511	299	972	507	400	50	1641	1024	517	575	238	478	336	361	1392	287	394	1509	480	257
ZCCHC11	2215	5793	816	8636	2155	7686	495	8552	755	8029	1774	5893	1907	8125	2157	6827	400	8580	2640	5358	755	5797	1300	6476	1616	5607	1107	13428	5836	2740	1675	2552	1370	2912	1570	2552	1311	1624	2133	5083	1668
ZYG11B	837	712	684	863	700	1529	435	928	452	1094	189	1486	1239	390	1878	1423	0	1760	1202	977	332	1108	805	1071	883	1308	280	2022	2181	719	1338	583	477	1605	878	956	1178	682	1237	999	1265
ZYG11A	22	0	30	213	844	0	476	30	106	142	186	1	456	0	487	2	0	63	301	2	218	4	329	9	746	0	147	94	1200	38	769	12	635	2	807	676	741	1087	808	5	749
LRP8	3532	569	427	940	3842	343	2765	673	2025	349	2902	372	274	834	4566	89	482	170	2713	119	704	124	1057	249	1750	60	965	760	4141	104	3836	172	543	1902	1111	2114	1526	1917	2782	121	3376
GLIS1	34	0	0	0	0	0	0	0	0	0	0	0	0	0	0	0	0	0	0	2	1	0	0	0	0	0	0	0	0	0	0	0	0	0	0	0	0	0	0	0	0
NDC1	1706	1215	1286	605	1900	416	1258	1097	1414	646	626	754	302	941	776	988	2074	1310	3379	728	1041	1221	2778	873	2857	864	1572	580	2186	672	2197	794	1024	4228	8687	6695	4562	10575	5038	571	2476
HSPB11	7446	3684	9311	2788	7342	1533	7029	3944	4887	2115	7128	2824	2290	2449	6125	2775	2524	1479	3727	2003	2075	1637	2235	1723	2976	1459	4186	2814	7506	2150	2135	2569	3262	4568	2635	1454	7674	3755	1105	1355	1340
CYB5RL	3	469	149	395	396	166	260	454	189	651	354	739	108	0	440	976	1048	173	147	192	95	202	33	182	217	55	7	84	19	137	51	14	33	259	283	184	120	123	316	154	113
SSBP3	812	199	127	270	584	134	274	459	225	338	276	269	819	236	487	162	363	176	959	72	78	234	183	125	488	79	503	319	176	171	754	114	138	1134	813	4464	219	426	868	132	420
ACOT11	748	0	0	0	98	0	300	82	0	0	320	0	1741	0	21	0	0	0	9	0	9	0	17	0	2	0	3	0	49	0	102	0	0	26	1	2	0	0	26	0	6
MROH7-TTC4	1	0	0	0	0	0	0	0	0	0	32	0	0	0	0	0	0	0	0	0	0	0	0	0	1	0	0	0	1	0	2	0	0	2	0	1	0	0	0	0	0
PLPP3	1359	586	672	252	2016	534	727	528	588	875	78	452	1504	528	168	293	1135	114	243	83	1699	100	12	306	393	107	394	289	674	42	169	134	6	0	1463	2175	263	0	165	224	954
PRKAA2	0	0	494	0	0	0	5	0	0	0	0	0	0	0	0	0	0	9	7	0	0	0	0	0	96	0	8	1	0	0	0	0	0	8	0	0	0	0	0	0	0
C1orf168	49	0	0	0	0	0	0	0	0	0	0	0	0	0	0	0	0	0	0	0	0	0	0	0	0	0	0	0	0	0	0	0	0	0	2	6	30	2	0	0	0
C8B	0	0	0	0	0	0	0	0	0	0	0	0	0	0	0	0	0	0	0	0	0	0	0	0	0	0	0	0	0	0	0	0	0	16	0	0	0	0	0	0	0
DAB1-AS1	0	0	0	0	0	0	33	0	0	0	0	0	0	0	0	0	0	0	4	0	0	0	0	0	0	0	122	0	0	0	0	3	0	0	0	0	0	0	0	0	0
OMA1	2375	3990	966	4238	1319	2423	1055	4001	674	2929	2641	5749	1212	2263	812	5109	1309	3394	2306	2577	756	3058	708	2550	1121	2728	1052	4791	4317	1483	545	2661	2654	3675	1639	746	2236	2372	757	2036	640
LINC01358	104	92	791	24	467	60	445	63	629	113	960	65	155	69	0	77	318	12	622	30	475	30	80	48	156	0	1465	38	896	75	594	37	82	237	11	4	149	32	8	39	19
HOOK1	648	674	92	1185	472	928	608	866	1524	852	136	1013	0	402	0	807	0	460	86	303	84	248	24	394	240	667	178	1051	372	272	110	168	0	67	0	0	0	208	288	322	462
LOC101926964	0	0	0	0	0	0	0	0	0	0	0	0	0	0	0	0	0	0	2	0	0	0	0	0	0	0	0	0	1	0	0	0	0	3	0	0	0	0	0	0	0
PATJ	228	860	0	1448	868	968	347	1195	4	1488	0	2318	0	2933	478	1937	374	2692	277	1557	10	1495	22	2428	844	2705	357	5776	214	943	8	535	151	529	1511	1432	154	947	1574	1377	38
KANK4	0	0	0	0	0	0	0	0	23	0	0	0	0	0	0	0	0	0	8	0	2	4	0	35	8	0	0	2	18	0	0	0	8	0	1	2	2	0	0	0	0
DOCK7	297	562	1033	410	1685	169	386	217	971	228	680	212	0	22	441	435	407	372	313	126	183	282	637	280	370	304	0	299	1081	104	300	150	284	1563	870	1926	4166	874	2678	258	230
ATG4C	963	5497	372	4602	1796	2926	1172	2910	2412	2292	2037	6091	1154	823	1003	4075	1602	3503	1332	2890	547	3169	629	2522	945	2289	1586	4122	2204	1558	916	3255	702	2653	3273	1211	3159	2391	701	2712	791
LINC00466	0	0	0	0	4	0	75	0	46	0	140	0	0	0	4	0	0	0	6	0	0	0	0	0	16	0	95	0	3	0	37	0	2	2	0	0	14	4	0	0	10
PGM1	7351	2526	1295	1367	3838	1312	2279	1976	5166	2036	1469	2991	205	2368	4434	2800	2850	615	631	578	869	498	396	626	497	317	404	291	3150	342	2850	232	600	2453	1870	4626	2828	374	848	288	424
ROR1	843	1082	0	56	0	455	0	914	0	158	194	38	0	0	0	713	2	2	12	53	25	22	0	8	2	15	360	4	0	45	108	29	7	10	0	0	0	0	1	103	36
RAVER2	281	114	236	250	544	0	182	19	468	0	0	74	0	0	348	0	0	352	180	129	2	205	33	316	256	249	431	238	431	237	175	161	83	35	48	4	253	12	0	179	401
JAK1	11010	21629	875	21693	4265	13628	1857	16575	6368	19618	2728	19288	2968	8930	4665	30160	5678	11106	5331	8147	1632	7927	1984	7309	2340	7036	1883	11950	10918	6202	5424	8680	1628	6991	4718	10246	2056	1849	5235	7982	6457
AK4	1251	10	467	42	1912	80	1282	208	679	220	682	0	1082	2	392	0	2010	26	586	4	202	28	1383	4	355	36	683	104	4862	42	3699	98	1054	7228	3278	1958	4009	3272	1663	1	283
DNAJC6	387	0	0	0	56	28	0	0	0	0	12	0	158	0	600	0	0	60	212	1	31	8	263	5	259	20	230	2	244	16	511	0	769	2146	1422	2538	449	67	441	33	150
PDE4B	4783	6701	803	10581	1926	9165	939	7961	5419	21742	5122	7507	2935	14865	2522	12083	2	42385	6479	19487	3350	8916	877	7545	6090	10598	3046	11361	5550	7234	248	14781	1892	1196	8494	6565	114	100	80	9524	4768
TCTEX1D1	0	0	0	0	0	0	0	0	0	0	0	0	0	0	0	0	0	0	0	0	2	0	0	0	0	0	4	36	0	0	0	0	0	0	0	0	0	0	4	0	0
WDR78	94	11	0	236	20	162	45	302	95	335	109	398	0	25	9	141	73	79	62	91	33	19	10	64	104	22	0	193	1020	16	28	76	6	18	11	7	35	9	0	66	49
SLC35D1	104	547	600	517	845	566	232	992	1009	770	979	902	0	610	43	557	32	1377	1771	939	577	1216	667	1235	1497	1035	1097	3393	6068	845	1378	1185	704	1992	1528	1228	1154	2447	2111	1192	1309
IL23R	357	0	0	0	0	0	2	0	0	0	42	0	0	199	1041	0	0	2	138	2	39	0	6	0	251	1	0	4	1330	0	0	0	0	0	192	107	0	46	40	6	988
SERBP1	13464	13102	16152	12546	23137	7580	17002	12138	36704	9322	16241	11596	9560	4578	9856	10777	7763	5094	10103	4044	3805	4755	6670	4811	10137	3072	14006	5716	10131	4066	14147	3279	5984	10520	17490	32469	13666	23921	22323	2499	10976
GNG12	1145	0	0	0	60	0	0	0	447	0	0	0	0	0	0	0	1714	0	862	0	30	6	64	0	74	0	131	0	0	0	40	0	0	0	0	0	0	8	0	0	2
GNG12-AS1	0	0	0	0	0	0	0	0	0	0	0	0	0	46	0	0	19	0	1	2	0	0	0	2	6	0	0	6	0	6	11	0	0	0	18	13	0	0	0	0	14
WLS	4085	0	0	0	0	0	0	0	99	0	0	0	1974	0	0	0	0	0	34	0	6	0	6	0	6	0	0	17	0	0	0	0	0	0	875	1998	2	0	0	2	250
DEPDC1	796	268	1672	70	945	96	2119	201	2437	2	1902	0	1938	94	420	4	2150	204	2262	8	492	84	954	3	2067	2	660	0	1322	32	1488	14	781	5799	4860	1940	6375	11804	6172	2	935
PIN1P1	20	6	28	10	18	4	12	6	8	6	24	14	2	4	26	16	6	0	2	0	0	0	2	0	0	0	2	0	8	0	2	0	2	0	0	0	0	0	0	0	0
LRRC40	560	1351	1056	1194	1647	860	1552	1279	2709	1275	2714	1279	0	617	1310	827	935	1863	3448	1333	1293	2733	2421	1600	2384	1437	2509	1465	7904	768	3166	913	2173	4712	3151	1293	5878	4817	1855	945	1373
ANKRD13C	1584	1513	601	830	680	1821	1468	2288	1587	3392	805	2098	0	783	2064	2099	295	1868	1454	1108	403	1806	658	2285	1122	1339	1278	1524	3706	706	1143	1233	504	1907	929	1055	2192	5096	3323	1022	1008
PTGER3	0	0	316	0	528	0	298	0	1644	0	1823	0	0	0	1459	0	0	0	2	0	51	6	684	0	2	0	133	0	735	12	0	2	4	1213	205	497	210	16	8	0	0
ZRANB2-AS2	70	2	89	22	21	26	4	23	50	24	59	32	0	101	0	16	26	16	1	12	7	6	9	16	2	24	203	19	7	32	4	47	17	41	47	22	37	8	9	44	52
LINC01360	0	0	0	0	0	0	0	0	0	0	0	0	0	0	0	0	0	0	0	0	0	0	0	0	0	0	0	0	0	0	0	0	0	0	17	0	46	0	0	0	0
LRRIQ3	35	230	230	295	54	94	28	141	409	186	5	177	106	23	118	88	0	65	283	170	49	114	94	134	37	81	119	148	794	191	215	95	150	267	304	106	301	197	68	66	18
FPGT-TNNI3K	0	0	0	0	0	0	0	0	0	0	0	0	0	0	0	0	0	0	0	0	0	0	0	7	0	0	1	0	0	0	0	0	1	0	0	0	0	0	0	1	0
TNNI3K	0	0	0	0	0	0	0	0	0	0	0	0	0	0	0	0	0	0	0	0	0	0	0	0	0	0	0	0	0	0	0	0	0	0	0	0	0	0	0	0	0
ERICH3	0	0	0	0	0	0	0	4	0	0	0	0	0	0	0	0	0	0	0	12	0	0	0	10	0	0	0	8	0	0	2	0	0	0	0	2	70	0	1	0	0
SLC44A5	102	231	0	2	0	0	0	0	39	36	2	0	0	273	0	151	0	67	15	240	280	38	0	55	84	4	22	55	15	243	310	33	23	4	178	216	36	0	1	17	0
MSH4	0	44	0	0	34	0	0	25	18	0	2	58	0	0	0	0	0	87	9	9	7	29	2	50	29	96	286	77	111	0	62	26	77	106	15	4	2	126	25	0	8
ST6GALNAC5	0	0	0	0	0	0	0	0	0	0	0	0	4	0	0	0	0	0	0	0	0	0	0	15	0	0	0	0	2	0	0	0	0	0	0	1	542	6	0	0	0
AK5	0	14	4	22	0	0	0	0	0	0	49	2	3	0	0	6	24	150	66	21	37	73	13	67	23	8	10	33	143	35	17	11	1	15	10	1	10	14	0	67	58
ZZZ3	953	2124	139	1861	1769	430	2195	1789	1629	2740	2056	3502	0	887	1701	1839	148	2422	2725	1635	1171	1946	1173	1843	1628	1569	1850	3652	6828	1063	1718	1281	1301	2925	1932	2265	2343	2805	2895	1576	1558
MIGA1	199	745	110	815	623	715	261	1251	438	1416	245	1150	0	526	152	1373	0	1900	1570	1261	586	1575	482	1540	608	1261	591	2346	3285	1108	1100	629	535	1089	1015	540	819	1093	686	1140	349
NEXN	382	725	1378	288	144	260	60	332	140	153	624	552	719	668	960	462	110	612	983	815	432	444	28	861	184	424	4729	688	1464	732	16	763	2827	294	1650	872	1232	131	0	1085	736
GIPC2	0	0	0	0	0	0	0	0	0	0	0	0	0	0	0	0	0	29	0	0	4	16	0	63	8	0	0	0	0	0	30	4	2	43	1	4	32	120	16	0	32
MGC27382	0	0	0	0	0	0	0	0	0	0	0	0	0	0	0	0	0	0	0	0	0	0	0	0	0	0	0	0	0	0	0	0	0	0	0	0	0	0	0	0	0
ADGRL4	0	0	0	0	0	0	0	0	0	0	0	0	0	0	0	0	0	0	69	0	0	0	0	0	2	0	0	0	2	0	0	0	28	0	0	0	24	0	0	0	0
LINC01781	0	1296	22	1482	0	2114	14	2161	80	4056	4	2618	0	2898	2	1585	0	2379	4	1377	53	731	2	4838	6	1715	8	2347	0	3451	8	2290	0	0	0	0	2	0	0	2946	1
ADGRL2	0	0	0	0	0	0	690	0	160	0	0	0	0	393	1944	0	22	0	1	2	0	4	52	0	22	0	0	2	3	0	0	4	2411	143	2446	2597	70	487	195	0	0
LINC01725	0	0	0	22	0	0	0	0	0	14	0	66	0	0	57	33	0	54	0	42	0	25	0	108	68	24	0	185	0	11	0	16	0	0	2	0	0	0	0	97	2
LOC101927560	0	0	0	28	0	0	5	7	0	0	0	51	0	20	30	7	0	14	0	7	2	4	0	33	5	9	4	6	0	1	0	19	0	0	0	0	0	0	0	17	0
TTLL7	61	0	546	0	0	0	0	0	1471	0	0	0	0	0	0	0	0	6	0	2	0	0	0	0	127	0	0	2	0	0	0	0	153	720	174	159	110	0	0	0	107
PRKACB	1767	4653	542	2964	640	2610	373	2966	1303	2579	653	3840	620	1053	686	3772	290	7241	3868	8006	737	9327	637	3222	1324	7502	311	6506	2193	4198	716	3655	1004	1414	638	1038	938	1041	947	4613	651
SAMD13	0	0	52	0	0	10	0	44	134	0	0	0	0	92	0	0	0	0	8	4	0	4	0	0	0	4	0	0	0	0	30	0	43	95	141	112	4	27	64	0	4
LINC01461	0	19	0	0	0	0	3	0	43	0	38	0	0	0	11	7	0	0	3	0	0	0	0	0	0	0	0	0	0	5	0	0	0	0	0	0	0	8	2	0	0
LPAR3	86	0	0	0	0	0	0	0	88	0	0	0	0	0	0	0	0	0	54	0	10	0	1	6	18	0	0	0	10	0	0	0	2	2	0	20	2	14	11	0	0
MCOLN2	2727	1355	4609	999	4213	833	1965	1778	15639	1048	6665	323	2778	2666	7677	1761	9687	1713	2849	361	2259	623	2112	1212	4534	558	906	2423	15818	862	380	249	5240	1399	2783	2603	8792	22648	12575	946	4271
WDR63	88	0	32	0	2	0	0	58	499	0	267	0	0	204	0	0	0	5	99	0	4	8	5	0	2	0	3	0	776	0	3	2	25	8	285	367	1635	1199	1432	0	45
C1orf52	1998	2131	3210	2989	3537	3126	2976	4380	4691	3851	4909	3215	540	1819	2741	3349	3041	1627	2001	1707	756	1694	1061	1808	1055	1889	2241	2743	3816	1304	1589	2781	1367	1394	2858	1600	2012	3243	967	794	402
COL24A1	0	0	0	0	0	0	0	0	0	0	0	0	0	4	0	0	0	23	82	0	0	0	0	5	2	1	0	6	0	0	0	0	0	14	0	0	2	1	0	0	0
CLCA2	0	0	0	0	0	0	0	0	346	0	0	0	0	0	0	0	0	0	40	1	12	0	0	0	0	0	118	16	0	0	1	0	0	0	0	4	0	0	0	0	0
LOC105378828	448	128	341	117	4	256	66	203	250	256	75	185	0	166	893	156	8	30	40	13	4	15	10	69	12	94	96	26	119	14	43	0	20	30	2	8	128	38	43	13	14
HS2ST1	878	1167	377	567	991	368	296	230	671	433	569	556	532	129	959	654	132	785	929	593	190	594	605	349	1164	567	600	994	2478	428	973	392	474	3113	1573	2578	1384	1790	2718	613	733
LOC101927844	0	0	0	0	0	0	0	0	0	6	0	0	0	0	0	0	0	0	0	0	0	0	0	0	2	0	0	0	0	0	0	0	0	0	0	0	0	0	0	0	0
PKN2	874	990	1430	2004	1120	3160	528	2074	845	2441	411	2499	406	1538	1240	1964	661	3129	2200	2296	618	2668	1693	4084	1395	4345	1628	4959	6107	1310	2570	1632	1383	1255	1455	832	1917	3939	2468	2250	841
GBP1	14476	12484	356	9119	112	3613	2	8092	706	3563	1463	8403	0	309	398	9117	0	4556	1363	5901	871	6032	917	7633	738	2687	85	10736	8772	3228	24	13317	2109	5771	126	363	113	5787	632	8354	7414
GBP4	5499	11791	1112	11095	469	3742	181	8163	1193	4760	1116	12880	0	1612	1521	14294	4189	11671	8477	12832	2889	12450	1648	12646	795	5416	470	18144	18355	5640	385	22451	13296	4346	102	94	1086	7040	4393	21500	5830
LRRC8B	313	1774	1050	998	1132	1813	649	1154	389	1298	576	1143	0	240	0	2069	6	1115	926	587	97	522	426	790	843	669	224	1248	1562	423	639	725	659	1257	1612	1735	758	1821	1478	461	343
LRRC8D	3604	3033	626	1211	1475	1390	1288	2730	2337	1456	87	2451	378	516	516	3051	987	1524	2228	1077	329	984	1750	842	702	675	280	977	2247	693	924	1009	1078	1313	1776	2610	1837	1740	2467	761	569
HFM1	0	0	36	0	190	0	74	6	273	0	40	11	0	29	2	6	174	5	206	3	167	0	181	4	348	0	24	0	622	1	751	0	58	34	14	38	8	105	26	0	38
RPAP2	1955	2523	1252	2423	2445	1557	1811	2494	3610	1874	2056	3581	334	1004	1602	2210	1218	2172	2100	2041	1405	1339	1731	2065	2052	1751	1028	2601	4278	760	2389	1211	1730	2009	2184	1212	3135	4199	1266	1327	531
EVI5	591	596	32	1406	480	1664	144	844	1106	875	0	964	924	1282	566	1105	0	1345	605	772	186	806	334	969	543	1150	451	1580	1628	482	871	425	1587	2	320	400	439	460	290	688	521
MTF2	4559	6216	2600	8275	4609	5295	3883	7355	7633	5122	4629	7795	6438	4737	4042	6665	2280	4908	5464	4295	1205	4610	2006	4185	3259	4205	4852	6103	3782	2436	5208	4694	1414	3535	3824	1937	4457	8372	3343	3174	2129
CCDC18	1990	3114	2944	4521	1688	3013	2236	4053	2848	2962	1235	3424	196	3792	1716	3340	897	2917	1480	2548	750	1942	905	3064	1617	3652	2426	4113	4714	1857	1668	988	898	1397	2165	767	1628	3791	2621	2285	999
FNBP1L	15	200	368	474	1818	348	383	1026	838	707	496	124	0	300	768	299	930	489	922	287	838	342	1689	732	2157	506	611	1168	8738	152	2757	165	577	1416	244	411	652	2703	2182	450	133
BCAR3	495	2552	51	1342	191	3043	94	2972	1885	1786	577	3159	2725	2328	255	6918	0	303	80	267	69	366	45	246	36	469	3	964	127	414	90	279	56	282	26	47	387	1283	984	231	15
ABCA4	0	0	0	0	37	0	25	0	20	0	47	0	0	0	0	0	0	4	18	13	25	0	5	6	1121	0	1970	0	2	0	12	0	258	0	16	17	197	0	2	36	11915
ABCD3	440	823	1318	630	1773	466	373	935	2063	1164	2150	1209	279	418	1975	869	0	1145	2695	888	1039	1049	1324	755	2631	777	1495	1219	8582	473	2217	657	1870	2383	3015	3245	5885	5573	4156	710	3500
LINC01057	2	0	0	0	0	0	0	0	0	0	0	0	0	0	0	13	0	0	17	0	0	0	0	0	0	0	0	0	0	0	0	0	8	0	0	0	0	0	0	0	1
SLC44A3	0	0	0	0	0	0	0	0	0	0	0	0	0	0	0	2	0	3	2	0	0	0	0	0	0	0	0	0	0	0	16	0	0	9	0	0	16	0	0	0	0
TMEM56-RWDD3	21	62	49	31	17	37	4	70	10	0	0	11	0	95	17	124	0	66	18	44	3	104	27	59	13	44	0	30	64	12	55	33	17	25	12	6	41	28	6	16	18
LOC101928118	0	0	0	24	0	85	5	20	0	21	58	91	0	143	0	12	0	32	5	8	0	4	4	14	7	2	0	0	0	2	9	0	0	13	4	0	0	4	0	32	0
LINC01761	0	0	0	0	0	0	0	0	0	0	0	0	0	0	0	0	0	0	0	0	0	0	0	0	0	0	0	0	0	0	0	0	0	0	0	0	0	0	0	0	0
LINC01787	0	0	0	0	32	0	0	0	0	0	0	0	0	0	0	0	0	0	0	0	0	0	0	0	0	0	0	0	0	0	0	0	0	0	0	0	0	0	0	0	0
PTBP2	460	270	296	1160	894	380	342	1060	534	1865	1178	879	700	1611	452	911	142	2459	2189	1172	420	4235	1676	3082	3439	2501	1812	4639	6893	1220	7242	3471	1175	1191	1970	1098	2208	8452	1739	1268	1020
DPYD	692	1906	3581	1589	1566	1054	1976	1782	4440	504	248	1692	1480	559	172	3329	3191	1272	2949	1212	126	815	1838	1032	225	689	3929	1573	4287	467	321	690	476	1708	1217	980	184	1348	1505	1122	337
DPYD-AS1	0	0	0	3	0	0	0	0	0	0	0	0	0	0	0	0	34	8	16	3	0	2	10	1	2	6	0	0	29	12	8	2	0	1	0	0	0	2	1	7	0
LINC01776	0	0	0	0	0	0	0	0	0	0	0	0	0	0	0	0	0	0	0	0	0	0	0	0	0	0	0	0	19	0	0	0	0	0	0	0	0	0	0	0	0
SNX7	986	548	14902	174	9893	230	7746	166	22272	0	979	0	841	520	5933	0	1354	0	3500	4	1119	24	4692	4	1304	0	202	0	7515	0	6	78	671	193	6	6	3323	7158	1620	0	1520
LOC100129620	0	0	0	0	0	0	0	0	0	0	0	0	0	0	0	0	0	0	0	0	0	0	0	0	0	0	0	0	2	0	0	0	0	0	0	0	16	0	0	0	0
PLPPR4	0	0	0	0	0	0	0	0	0	0	0	0	0	0	0	0	0	0	0	0	0	0	0	2	0	0	0	0	0	0	0	0	0	0	28	29	8	0	0	0	0
PALMD	0	0	0	0	0	0	0	0	0	0	0	0	0	0	0	0	0	0	0	0	0	0	2	3	8	0	0	0	3	0	0	1	22	5	8	0	6	2	0	0	12
MFSD14A	7944	6769	6982	4852	3284	4729	4105	5210	7916	11876	6771	6127	311	4043	7321	5219	1224	5691	7337	2076	1162	3844	2346	2517	2368	2903	457	3266	9338	1265	4280	2450	2165	5631	4607	3641	3158	6295	3896	1640	2406
CDC14A	740	1392	1516	1019	561	948	863	1010	1334	1533	486	1138	280	2329	146	2008	500	464	413	220	108	572	161	302	526	582	525	455	1410	320	1111	418	412	545	273	448	482	669	1056	184	681
VCAM1	4683	0	1991	2	5548	0	3607	0	11730	0	1741	2	2174	194	4838	0	4146	2	3588	0	3473	24	3458	0	1193	2	695	2	9151	6	16	8	4553	5784	5336	1805	3504	803	94	6	1504
OLFM3	25	0	0	0	0	0	0	0	0	0	0	0	0	0	0	0	0	0	36	0	0	0	0	0	1	0	0	2	0	0	0	0	0	0	318	135	134	2	0	0	4
COL11A1	0	0	0	0	0	0	0	0	0	0	0	0	0	0	0	0	0	4	0	0	0	0	12	2	0	2	1	1	2	0	0	0	0	0	0	2	76	0	0	0	0
RNPC3	1633	2936	691	3357	1126	4760	517	4023	1154	4136	1396	3854	1510	5133	918	4567	420	2123	1367	2199	684	1343	492	4108	1234	3205	905	10452	5210	1521	1071	958	878	1174	747	420	850	965	506	2333	393
AMY1A	0	0	0	2	0	0	0	0	0	0	2	0	0	0	0	0	0	0	0	0	0	0	0	0	0	0	0	0	0	0	0	0	0	0	0	0	0	0	0	0	0
VAV3	513	4865	0	7779	31	4722	91	6088	16	6975	466	6169	0	4399	0	5740	10	2854	70	2813	12	1568	262	1494	48	1837	0	2915	18	1174	6	1720	81	4	4	1	6	22	42	1796	2
VAV3-AS1	16	913	10	2157	0	890	0	1514	36	1611	58	862	2	1025	2	2983	0	1284	0	799	12	965	2	551	3	1153	3	1127	0	662	2	848	0	0	2	0	2	1	0	1572	0
STXBP3	3728	4349	1717	3686	2920	1787	1563	3147	9969	3059	4616	4958	92	1423	5626	3246	1682	4113	5827	2486	2191	4137	2847	2785	2255	3857	2163	4161	12030	1227	4422	3077	2460	5712	4122	1998	4804	7158	3388	1897	1768
GPSM2	1742	503	687	63	490	349	828	176	1720	318	847	72	0	589	0	249	594	250	322	104	107	176	131	86	256	63	481	415	605	106	438	91	219	996	378	709	475	488	1364	125	195
WDR47	667	306	574	204	641	512	576	658	2783	1036	944	1069	2930	40	2380	1161	126	293	379	234	83	220	232	111	213	281	47	259	699	183	489	430	331	613	422	808	637	936	1383	173	408
KIAA1324	1170	0	196	0	0	0	0	177	270	188	94	50	0	471	0	0	0	36	1075	2	127	19	4	30	134	64	10	250	320	77	84	0	86	2	10	0	22	36	8	8	0
MYBPHL	0	0	0	0	0	0	0	0	0	0	0	0	0	0	0	0	0	0	0	0	0	0	0	0	0	0	0	0	0	0	0	0	0	0	2	0	0	0	0	0	0
GSTM1	91	13	5	2973	6832	882	3829	2530	1886	2040	450	39	8	14	49	1560	3183	1	18	574	775	740	16	1921	3691	698	662	0	11	1	5	1097	760	22	1434	1179	7715	23	8	474	213
KCNC4	866	694	1004	361	1100	581	908	919	4369	1672	540	630	2093	765	356	865	318	100	267	74	27	66	0	17	257	161	82	11	224	67	410	80	297	806	62	385	51	59	126	59	2
RBM15	3540	1321	853	1719	1268	2246	5128	3111	4625	5065	6239	2704	10	1397	3952	3782	6235	1106	1295	820	469	546	743	950	1098	795	1628	856	2190	600	1773	553	988	1062	613	541	923	1458	1514	611	568
DRAM2	4140	14986	766	19845	2039	9529	1406	18433	4593	12531	3488	19989	3229	7776	4059	16904	2610	13588	3941	13176	2197	14545	2080	13458	1534	13709	2726	18893	10277	6271	3507	14546	1271	4006	725	648	2420	2643	1413	10489	4319
TMIGD3	160	0	510	0	380	17	735	0	11	0	627	74	945	0	298	0	326	0	616	0	164	2	476	2	0	2	584	0	318	0	29	0	134	1356	16	8	555	2209	814	6	26
KCND3	0	0	992	0	622	0	1246	0	6421	0	112	0	0	0	2	0	253	1	8	1	18	0	27	0	36	0	1	0	67	0	297	0	88	0	0	0	0	2	0	0	8
CTTNBP2NL	567	126	68	586	141	0	90	168	977	80	208	62	2	808	278	116	168	125	685	244	488	141	382	201	1308	70	396	1059	723	46	640	113	1488	802	458	485	244	1380	732	190	363
ST7L	930	489	201	534	271	886	524	662	814	476	636	881	288	768	1181	1219	180	694	670	258	142	360	81	603	291	524	69	508	671	252	484	169	146	319	122	190	252	854	672	263	66
LINC01356	6	9	9	14	18	3	7	14	19	5	15	67	13	1	7	19	9	0	0	0	0	0	0	0	0	1	0	1	0	0	0	2	0	0	0	0	0	0	0	0	0
LRIG2	471	1033	24	967	312	1235	268	2137	440	1277	8	1223	2	1336	726	1478	460	2017	1153	1165	255	1280	316	1187	502	1432	217	3445	1701	767	667	575	341	372	300	357	260	939	1009	1354	152
MAGI3	811	0	951	20	605	34	146	54	1501	35	547	35	146	60	609	31	891	113	1206	34	72	48	407	39	423	2	76	1	6820	74	242	4	401	1003	484	431	588	928	1920	39	392
AP4B1-AS1	17	169	2	101	40	99	32	39	11	0	24	77	0	30	0	116	34	186	52	125	28	163	31	172	23	142	80	147	69	67	38	32	49	12	20	18	27	52	60	107	11
BCL2L15	2	0	0	0	0	0	0	1	62	58	0	8	0	75	0	32	0	100	13	41	24	50	0	22	1	75	0	252	32	18	59	45	31	6	2	6	19	20	51	60	0
SYT6	300	0	0	0	0	0	0	0	0	0	0	0	0	0	0	0	0	0	0	0	0	0	0	0	4	0	0	0	44	0	74	0	24	0	0	0	0	0	2	0	0
TRIM33	2792	4671	1172	4948	2952	5195	1049	5193	3850	5805	1569	5439	418	4462	1910	5264	1608	5318	3659	3306	862	4639	1967	4034	1809	4047	955	4936	8325	2104	4243	3520	1635	2620	1829	2698	4343	8007	10713	3084	2896
DENND2C	1	0	12	48	4	0	0	0	379	15	0	0	86	78	0	0	0	45	165	26	2	18	3	14	4	81	9	134	39	41	61	9	103	16	103	83	380	1482	1168	45	14
SYCP1	0	0	0	0	0	10	0	0	0	0	0	0	0	0	0	0	0	0	0	0	0	0	0	0	0	0	0	0	0	0	0	0	0	1	0	0	0	0	0	0	0
TSPAN2	3266	0	14	0	0	0	320	0	0	0	0	0	0	0	190	54	3196	5	1383	3	242	10	1044	1	2354	6	65	0	3245	0	890	2	2	134	260	139	48	1341	1172	2	878
NGF	6	0	0	0	0	0	0	0	0	0	0	0	0	0	0	0	0	0	0	1	0	0	0	0	0	0	0	0	0	0	0	0	0	0	0	0	0	0	0	0	0
CASQ2	0	0	0	0	0	0	0	0	0	0	0	0	0	0	0	0	0	0	15	0	0	1	0	0	0	0	0	2	0	0	0	0	0	0	0	0	0	0	0	0	0
SLC22A15	8	15	59	38	558	82	404	16	86	0	0	1	0	17	37	80	148	255	951	44	90	82	179	338	105	11	0	51	399	105	240	104	87	0	28	26	10	102	149	278	126
ATP1A1	2171	730	1012	1211	1507	1247	2324	1474	4834	2153	1566	1245	2020	1156	1373	1071	190	1871	3173	1195	663	933	857	1537	3033	1176	853	975	4503	751	2687	1385	3501	2685	1321	8494	1838	4075	12724	1442	5316
IGSF3	493	2	2497	4	7580	327	5633	2	6762	0	9558	30	10260	828	15891	13	7865	16	1685	2	6096	3	1897	9	1265	2	3242	2	20654	6	4796	8	2620	8153	35	16	1588	3652	14710	4	32
CD2	38338	48	0	188	278	470	428	56	234	644	4037	84	1224	0	0	884	488	36	10433	8	1608	83	117	24	2719	56	60	218	4881	28	66	2	2277	8341	22	2	20	30	7	43	64
CD101	0	0	0	0	0	0	0	0	64	0	0	0	0	0	0	0	0	6	52	6	21	31	12	58	8	0	0	210	19	22	4	0	49	0	0	0	0	17	7	3	0
LOC101929099	48	12	0	0	117	0	163	11	48	18	181	0	0	0	86	0	0	0	67	0	82	1	9	2	27	8	41	11	0	0	52	0	36	47	30	7	44	116	48	0	44
VTCN1	0	0	0	0	0	0	0	0	0	0	0	0	0	0	0	0	0	0	0	0	0	0	0	0	7	0	0	0	0	0	0	0	0	0	0	0	0	0	0	0	0
MAN1A2	1902	1834	557	3508	1301	1985	1282	2232	1375	2892	334	2502	1014	1277	1077	1978	1666	1524	1891	1793	821	1013	755	2110	1548	1635	894	4544	4147	1526	2000	657	521	1364	722	535	692	1176	2232	1234	1050
SPAG17	700	0	38	0	0	0	21	0	0	0	10	34	0	0	0	0	93	17	7	0	0	8	3	24	18	2	27	0	14	7	7	1	0	3	2	7	11	17	8	2	6
WARS2	580	906	1399	393	787	578	746	569	1537	444	253	674	0	20	882	423	0	400	771	534	585	431	483	532	1552	402	484	279	1394	160	917	881	569	1043	711	459	1007	1732	834	240	591
LOC101929147	383	308	688	661	336	276	151	594	252	544	383	479	54	746	105	547	31	622	398	367	129	404	188	670	377	341	251	883	318	365	393	304	233	546	134	147	327	493	389	384	140
HAO2	0	0	0	0	0	0	0	0	0	0	0	0	0	0	0	0	0	0	0	0	0	0	0	0	6	0	0	0	0	0	0	0	0	0	0	0	0	0	0	0	0
FAM72B	162	0	570	46	799	0	599	179	833	130	234	49	716	154	1137	125	1418	7	167	4	104	22	52	45	205	0	98	0	125	2	74	0	69	302	256	293	194	414	542	10	153
SRGAP2-AS1	0	1	0	2	6	13	7	8	0	4	0	0	0	0	0	0	37	6	2	4	1	2	0	23	0	0	0	4	46	7	14	0	0	5	0	0	4	8	0	15	0
SRGAP2C	249	224	236	454	256	54	142	368	46	366	448	464	70	287	342	472	182	2486	1486	1354	611	2398	821	1352	2184	2162	552	1421	3881	1009	1577	1410	1155	1986	1461	654	2299	1774	478	1145	780
PDE4DIP	3701	2165	524	2342	680	1587	1439	2326	7711	3058	531	3787	1762	3260	598	3990	1446	1416	2343	1497	693	1096	206	1822	1082	1303	691	1763	2684	966	1180	597	6087	835	731	1436	436	644	659	1570	1471
NOTCH2NL	6740	7123	2064	7728	1525	6465	3734	10153	15766	11928	3209	8343	591	7167	6181	8449	2962	2825	872	2592	383	1851	482	3014	1098	1952	1134	3352	2118	1235	1619	2185	720	651	367	475	1152	406	587	3057	419
NBPF10	390	1095	66	1196	379	698	156	1472	349	795	163	842	439	650	121	902	90	1893	1068	1113	322	639	334	1671	921	575	536	1951	1293	584	1098	834	368	578	476	420	595	378	334	1333	389
LIX1L	838	987	290	844	1458	301	555	388	1462	806	112	501	376	465	646	1197	23	1864	1522	1539	1011	1645	843	1069	625	522	1190	1804	1844	1395	1266	1194	1158	2161	2115	3161	1618	1018	1780	1501	670
RNF115	4257	2356	2336	2536	2321	1002	1308	1588	4684	1933	2171	2949	1998	1193	2252	2019	1842	393	346	351	244	319	303	510	548	604	465	809	1135	270	291	219	739	431	502	1988	520	466	1334	686	559
NBPF12	460	574	136	1474	431	683	20	1044	307	913	145	811	28	817	388	577	291	979	340	788	236	501	167	896	372	643	408	539	504	309	558	560	243	208	255	530	285	208	173	889	457
FMO5	0	267	0	1079	0	294	0	186	0	1154	0	430	873	2698	2	1318	0	1132	10	862	5	696	7	699	50	661	17	739	67	519	8	446	3	83	33	6	54	28	2	789	0
LINC00624	0	0	0	0	0	0	47	0	0	0	0	0	0	0	0	0	0	0	15	0	0	0	1	0	14	0	0	0	0	0	36	0	0	0	114	156	0	6	0	0	0
BCL9	258	17	0	138	488	30	206	154	303	15	166	114	0	97	272	8	56	192	571	211	520	116	463	147	1052	153	148	29	975	130	1505	18	304	689	709	1968	289	261	972	119	494
GPR89B	363	274	338	467	288	432	333	385	442	312	275	447	544	257	492	492	396	151	70	101	122	115	95	178	147	194	206	185	116	247	223	76	187	100	74	3	172	52	5	96	24
NBPF11	3	22	0	34	3	13	1	75	3	36	12	43	0	40	13	36	2	23	8	8	4	6	5	14	4	10	0	10	41	20	20	3	3	5	4	6	6	0	2	2	0
LOC101927468	4	0	0	0	0	0	0	0	0	0	0	0	0	0	0	1	0	0	1	0	0	0	18	0	2	0	0	0	4	0	70	0	0	0	0	0	1	0	0	0	0
LOC388692	334	370	18	835	70	239	0	474	140	237	214	548	0	1007	46	951	366	591	143	253	69	334	28	392	104	163	66	506	652	112	24	371	285	218	233	850	175	93	100	342	22
PPIAL4C	114	122	644	104	250	72	230	136	420	72	202	112	136	80	222	108	196	0	0	0	0	2	0	0	0	0	0	0	2	0	0	0	0	2	0	0	0	0	0	0	0
VPS45	4109	3467	2137	3493	1845	2746	2746	4060	3542	2531	4930	4115	495	1770	4720	4666	2373	2343	3551	1487	2774	1870	1445	1825	2875	1712	2902	2243	3580	1213	3061	1180	1486	1885	2020	2466	1501	2221	1894	1661	769
RPRD2	513	2636	466	1488	987	2012	1342	2680	1091	2548	274	2913	64	1024	731	2818	446	2675	1842	2956	1499	2553	1032	2260	2411	2271	901	2674	4234	2236	2376	1486	950	1390	1362	3371	1327	1030	2295	2175	814
TARS2	6801	7075	6022	2856	7402	3856	5552	6640	5297	3478	7944	5984	5818	7783	8567	7530	5364	1991	2779	2201	3607	1667	2918	1749	3298	975	1068	2608	5842	1063	3677	1016	2059	1684	2089	3209	2627	2034	3085	1291	1586
ENSA	4421	6241	3621	7291	4919	4357	4605	7633	7979	6934	3708	6954	2152	3646	5594	6565	4149	6151	6205	2914	2968	3600	3552	4192	11498	4821	5476	4447	9165	3853	7678	4682	8581	5320	3826	7298	4970	4292	5065	2889	1590
CTSS	10970	37168	1602	26661	3451	19279	4430	26977	3498	25706	7014	32316	2404	14552	23233	33444	5875	26293	3501	17971	5213	20374	3138	12167	8121	17125	3281	22853	29485	13536	2296	17668	8015	3153	4590	3849	473	6180	3971	18197	5845
ZNF687	139	30	8	448	16	403	110	359	19	49	24	399	0	175	2	164	12	132	147	184	187	174	85	342	324	152	166	246	238	247	353	38	183	134	81	1819	81	122	1268	99	106
POGZ	988	1504	100	1814	968	918	562	1297	360	1522	130	1447	156	2738	833	1506	806	5844	4536	3391	2274	4325	3080	4714	4880	5712	3378	7184	10305	3171	5682	3080	4707	4180	4630	3978	3182	2329	2954	4461	2934
TUFT1	488	173	0	206	292	83	754	195	0	38	324	176	0	0	816	41	0	20	367	23	186	33	102	6	135	80	23	1	92	28	108	53	26	1135	165	176	506	2	0	78	127
SNX27	558	1086	669	1213	1091	65	883	1165	1632	620	212	1540	0	831	916	1579	229	3861	4054	2307	1897	2989	2488	2488	4762	1461	1841	3585	6248	1118	3542	856	3679	4099	3766	2869	4330	2107	1371	2146	2658
RORC	0	112	44	0	3874	0	3249	106	1401	1	2618	0	2256	0	578	0	3000	7	1480	0	1026	0	30	2	3330	0	741	52	4	10	2593	0	0	641	2	6	0	0	2	2	688
FLG-AS1	0	0	0	0	0	0	0	0	126	0	0	0	18	0	0	0	0	0	55	0	0	2	119	34	105	0	0	0	0	0	0	0	107	194	0	0	0	36	16	0	0
CHTOP	5065	6602	7562	4796	6742	3263	6755	5108	5616	4922	7151	6622	7301	2029	5901	4816	5221	1342	1959	885	740	1069	848	1574	2167	1527	1372	1987	2159	1252	3537	2003	1399	1761	1566	5004	1617	1653	2971	678	663
GATAD2B	660	1021	474	1403	479	709	170	1039	632	1017	112	1143	0	408	417	1168	1139	6792	4374	4214	2076	5396	2202	3789	5451	2917	908	3484	5993	2133	5506	1909	2275	2570	2691	3198	3218	2822	1967	4081	2653
NUP210L	90	46	2	15	6	22	25	31	5	15	0	92	0	0	0	38	0	131	57	33	50	72	12	135	111	185	110	90	5	32	120	49	18	20	3	6	24	42	20	46	21
IL6R	7100	0	0	306	86	246	935	146	4789	166	1064	38	1228	1038	521	295	810	119	7048	39	2086	127	83	56	5695	48	1713	424	1168	149	8625	18	1859	2567	36	6	135	4	2	65	3401
KCNN3	0	0	0	0	0	24	8	82	194	0	0	0	0	0	0	0	69	47	0	2	6	46	0	2	120	2	16	190	3	4	68	2	4	2	243	142	439	86	353	6	96
PBXIP1	4007	9280	2	2541	132	3657	138	5643	320	10282	1140	5651	0	5570	424	11380	1254	972	544	487	119	589	56	913	444	587	81	1487	612	1030	228	690	116	160	22	795	77	30	267	544	86
EFNA3	0	140	95	153	98	284	216	246	202	38	98	209	502	210	343	48	274	45	37	43	86	43	30	5	93	112	32	2	0	18	28	34	164	290	73	381	184	33	134	16	2
ASH1L	5614	9847	2056	12363	4547	8392	3421	12210	3120	9419	2192	11184	243	7801	3151	9680	2678	15941	5082	14005	4532	7627	3532	12751	10309	14233	3590	31433	16672	4827	8889	4393	3926	2923	2505	1365	2713	3457	3381	13766	4251
MSTO1	3048	885	2231	721	1003	1139	1775	1968	3358	1429	4504	1996	1739	2254	5014	1584	1177	428	383	277	506	262	607	660	1128	158	558	402	953	280	1068	145	659	167	329	689	492	516	432	308	253
SYT11	4589	833	3626	1246	1448	374	2334	661	6694	486	4299	642	2342	1711	8599	565	2262	452	6930	415	2846	248	3204	146	4028	94	2987	294	14435	216	5520	163	3074	2593	2256	4648	1979	3483	4112	241	1572
LMNA	12380	124	62256	560	20124	9286	81226	2391	176457	27511	146693	555	129366	17201	113130	1058	37236	74	4595	19	1033	38	410	27	7840	97	1113	12	2662	18	3539	139	1756	795	1200	21703	971	967	5256	21	520
IQGAP3	540	0	6	8	0	0	0	0	12	21	2	0	0	0	6	99	40	18	6	6	6	33	64	0	6	5	0	58	902	14	100	2	2	0	527	1682	165	6	0	4	56
PRCC	10054	6983	6301	5303	3946	4078	7520	5941	13154	7468	5738	6865	3418	5210	10622	8460	6514	988	1246	760	971	686	998	1079	2033	905	1077	992	2127	661	2941	695	1297	1317	1581	8176	1243	1234	2761	506	1385
LRRC71	0	0	0	0	37	0	0	0	0	0	0	0	0	0	0	0	0	0	16	0	33	0	10	0	53	0	0	0	15	0	82	0	11	8	0	2	14	0	0	0	4
FCRL4	12	174	0	480	0	480	0	871	0	0	0	12	0	126	0	138	0	227	14	85	0	283	6	505	2	58	0	1526	0	170	0	48	0	0	0	0	14	0	0	279	126
CD5L	0	80	0	0	0	0	0	37	0	0	0	0	0	0	0	0	0	0	0	0	0	9	0	6	0	2	0	0	0	13	0	0	2	0	0	2	109	0	0	2	0
SPTA1	0	0	0	0	0	0	0	0	0	0	0	0	0	0	0	0	0	4	0	1	0	1	0	5	0	0	1	0	0	0	0	0	1	20	2	2	11	16	2	6	15
IFI16	14878	47028	14191	34173	9698	15179	9764	25383	10800	16628	3670	42201	2486	14647	5561	31056	10798	19555	11837	21594	7755	17513	3678	17497	5802	16960	5838	35476	14199	15059	4167	14921	8590	8801	8379	6277	816	5973	3942	17485	7247
FCRL6	98	0	0	0	0	0	0	0	0	0	292	0	0	0	0	84	0	0	99	0	58	0	2	0	29	0	0	0	0	0	0	0	30	0	0	0	1	0	2	1	0
IGSF9	79	2	159	6	394	64	201	69	333	19	789	58	0	58	2672	2	209	14	78	4	21	0	9	14	63	46	32	0	22	3	61	2	0	2	123	36	32	479	1325	38	0
KCNJ10	0	0	0	0	41	0	0	0	0	266	0	0	0	0	0	0	0	0	18	0	2	0	16	11	13	0	85	3	0	0	29	0	2	12	0	6	3	0	12	0	0
CASQ1	153	0	588	0	1089	0	146	101	106	0	229	40	0	0	528	46	1109	0	410	19	349	9	637	11	420	25	198	0	2853	4	1149	0	5	809	34	209	221	76	367	1	53
COPA	11182	6547	5372	5170	10555	3948	6971	4250	14924	4269	11512	5360	11510	6772	24336	9684	10056	9694	21027	7416	25887	5181	16092	6408	18293	4121	6538	8656	71557	3322	28256	2776	9589	9978	14003	16604	31205	12417	15022	6115	6910
CD244	492	62	0	169	0	0	42	10	0	57	0	58	0	262	0	52	0	285	31	230	5	100	0	220	50	115	0	18	76	92	2	142	0	0	0	2	0	76	511	167	0
PFDN2	8860	4552	15472	5146	8301	4017	7339	6144	9182	6342	9392	5176	5568	4825	9714	4589	4789	839	1876	1036	2215	648	1221	1157	2152	921	2772	465	2375	1312	1848	929	2428	3123	6007	5016	3884	2601	707	776	429
ATF6	2105	3136	1225	2846	2792	4061	1702	2856	6406	2535	4216	4118	24	2399	2382	4905	4122	4489	4895	3327	4192	2978	3508	2907	2949	3449	2135	6284	13132	1886	5014	2190	3684	4647	3335	3635	3777	2253	2395	3147	2495
NOS1AP	74	0	0	0	24	0	24	0	0	0	0	0	0	0	0	0	0	0	42	3	0	1	117	4	4	0	0	0	269	0	14	2	4	2	112	86	0	4	52	0	24
DDR2	576	0	0	0	796	2	234	0	24	3	1197	0	0	0	36	0	986	10	624	4	865	14	1242	21	402	2	764	40	3963	13	1198	0	87	1595	1418	393	137	344	354	36	2557
RGS5	248	230	358	243	456	202	218	449	371	57	192	110	0	132	171	145	0	275	284	197	261	224	155	167	168	161	34	126	476	187	172	110	232	576	1431	873	561	558	100	332	65
NUF2	3768	165	4299	317	4134	196	2943	751	6005	168	5368	470	2132	756	5727	254	1184	286	3228	54	1059	271	1588	222	2057	186	1813	106	2887	65	2981	50	2506	5131	6282	2851	5173	4451	2778	117	723
LMX1A	0	0	0	0	0	0	0	0	0	0	0	0	0	0	0	0	0	0	0	0	0	0	0	0	0	0	0	0	2	0	0	0	0	0	0	0	0	0	0	0	0
RXRG	0	0	0	0	0	0	0	0	0	0	0	0	0	0	0	0	0	1	0	0	0	0	0	0	0	0	0	0	0	0	2	0	2	13	10	1	26	0	0	0	0
LOC400794	0	0	0	0	0	0	0	0	0	0	0	0	0	0	0	0	0	0	0	0	0	0	0	0	9	0	0	2	0	0	0	0	0	24	10	7	73	0	2	0	0
UCK2	4033	678	8275	932	6432	535	3996	1002	10372	818	6750	249	3546	1548	4432	850	3816	415	1015	278	1237	517	1558	323	2847	60	773	638	1438	279	3663	329	1550	2702	4130	9107	4309	2956	3356	265	1594
FAM78B	82	2	3685	62	4485	14	7243	26	5521	64	3717	2	2603	164	5123	0	2638	4	378	0	563	8	1004	24	577	0	808	0	4304	0	823	4	1098	607	566	1246	822	14	33	8	605
FMO9P	0	0	0	0	0	0	0	0	0	0	0	0	0	0	0	0	0	0	0	0	0	0	0	0	0	0	0	0	0	0	0	0	0	0	0	0	0	0	0	0	0
MAEL	0	0	0	0	0	11	0	0	0	0	0	0	1164	0	0	0	0	6	14	0	8	2	0	0	0	0	0	0	0	0	0	13	6	17	0	2	0	0	0	0	5
POU2F1	1734	4254	1008	2692	2911	2375	1563	5416	1108	2975	1053	2960	549	2934	1283	4553	3734	4183	2146	3470	1448	3028	1424	2590	2724	2954	838	3515	5413	1611	2219	1693	855	1430	1635	2001	1741	1008	1338	3478	3440
RCSD1	4065	39905	74	40056	8	29835	250	34911	1354	30455	1524	39130	3563	13612	0	50590	10	7533	837	7462	125	5038	30	5295	759	3551	16	5515	2036	5091	1510	7277	46	2567	1	0	4	4	3	4565	1547
MPC2	4484	4156	10157	4727	5485	3635	4358	4126	8402	6260	5106	4045	4189	2587	6640	4551	2274	1500	2793	1741	2533	1357	3529	1428	3270	2699	2661	1837	2923	1392	4512	3984	3836	7842	3590	3305	3962	2041	1308	796	219
DCAF6	2148	2135	560	1104	829	1262	897	3135	1870	1526	1011	1964	646	984	1511	2095	1443	935	1441	700	1261	966	826	710	1371	589	170	2247	3625	689	1412	920	879	1215	1064	1518	630	1128	2071	771	1279
TIPRL	6002	3825	10422	2999	8004	1662	5869	4142	11435	3060	10497	3917	6162	1884	13071	3076	4391	1770	7322	1840	7286	2031	5896	1685	8704	1571	5617	2050	11187	1137	6506	2113	7308	5269	7577	5393	6853	7022	3794	1228	1248
DPT	0	0	0	0	0	0	0	0	0	0	0	0	0	0	0	0	460	0	2	0	12	0	0	0	0	0	0	98	10	0	0	0	0	0	0	0	0	0	2	0	0
LINC00970	0	0	0	0	0	0	0	0	0	0	0	0	0	0	0	0	0	0	2	0	0	0	2	0	4	0	0	0	241	0	0	0	0	0	0	0	0	0	0	0	0
ATP1B1	808	4	665	8	347	145	4162	13	1496	188	2726	0	865	355	1706	9	910	132	8642	7	1551	84	2774	143	9978	145	3532	297	15958	48	1179	210	6920	95	558	697	71	2457	1334	42	154
NME7	1394	857	2674	878	295	471	743	1020	3164	1240	2528	1415	235	977	419	431	32	531	1635	519	636	523	243	563	1616	416	638	655	2154	299	115	716	1070	3003	924	576	1843	960	478	395	487
BLZF1	938	2522	596	2316	360	1210	314	1284	888	1004	932	1849	6	738	2128	1373	235	1496	1339	1410	1792	1217	985	1091	2077	976	438	1055	4694	705	544	1325	2246	1983	2311	1263	2124	1901	741	1198	626
KIFAP3	2856	2177	4260	1352	8712	1175	3365	1597	5289	1756	9349	1460	3964	1492	18255	1406	7809	1860	14105	1453	14989	1252	3696	1113	10490	1064	6525	2560	24079	1129	3887	763	3918	6143	5475	3742	3363	3875	2319	1078	3775
METTL11B	0	0	0	0	79	0	33	0	0	0	136	0	0	0	164	0	0	0	56	3	85	0	0	0	43	0	0	0	0	0	5	0	19	0	0	1	0	0	0	0	0
PRRX1	3186	0	0	35	0	0	0	0	0	0	187	0	0	0	0	0	0	0	0	0	15	0	0	0	280	0	11	0	452	0	6	0	0	0	5	482	0	0	4	0	646
FMO2	0	0	0	0	0	0	0	0	19	0	0	0	0	0	0	0	0	0	0	2	0	1	0	0	0	0	0	17	0	0	4	0	0	0	5	1	5	0	0	10	0
FMO4	96	453	64	527	318	32	145	366	352	21	0	400	0	23	414	247	25	528	139	628	481	328	348	381	432	474	91	542	1273	298	107	382	570	217	284	94	118	87	86	347	42
VAMP4	1610	1614	325	2979	985	526	161	1956	1002	2173	1770	1924	187	1553	1216	2218	0	1382	960	918	633	1075	349	1269	641	923	181	609	1702	1183	813	2451	399	1517	718	955	506	208	394	799	174
LOC100506023	312	208	12	277	95	512	194	591	268	412	149	499	0	581	278	416	0	16	25	28	3	41	4	50	19	155	122	151	37	36	14	6	0	6	14	54	15	5	27	62	10
LOC101928673	127	64	18	292	58	224	342	389	94	365	0	338	0	792	291	221	150	256	148	185	69	218	72	325	84	181	136	445	217	123	100	73	46	66	80	53	70	31	29	209	54
SLC9C2	4	0	0	0	0	0	0	0	0	0	0	0	0	0	0	0	0	5	0	0	1	0	0	0	47	0	0	2	7	0	0	0	5	8	25	6	6	0	0	0	0
DARS2	1495	1914	1321	865	1520	939	1734	1950	4085	1110	1376	1719	1942	92	4743	1318	1337	1211	2810	936	1468	1087	2347	1418	5188	966	1011	1128	1172	358	1464	443	1290	3490	5606	2679	7533	6095	5375	732	1504
RC3H1	194	1156	64	1678	682	379	202	1236	920	1080	592	730	66	1387	192	1202	0	7624	5003	4082	1454	8431	2622	3813	5520	5862	1107	5629	8522	2535	3144	2539	2610	2351	3084	1909	3303	4083	2155	4155	3537
RABGAP1L	14413	6617	27	5488	1972	3348	2062	7796	1723	6102	6354	5323	2716	4198	4256	8238	2182	6753	3777	4410	4693	5338	2808	6087	7749	4849	341	8446	14327	3662	810	2405	4277	2711	4283	3266	363	7836	5799	5201	5970
CACYBP	15991	6879	21000	11296	19443	6703	17451	8024	24557	7210	18845	9279	11424	4217	18355	8221	7904	2804	5700	2365	5904	3150	6369	3585	8898	5427	8693	3104	6483	2887	6588	9121	12584	9832	18382	9201	29636	18204	4106	2188	2051
TNR	0	15	0	111	195	53	180	44	11	11	0	0	0	0	0	41	0	83	0	21	1	53	0	106	36	25	2	34	2	54	6	20	28	1	2	0	7	0	0	75	1
PAPPA2	0	0	0	26	0	0	0	0	0	0	0	0	0	0	0	0	0	10	0	2	3	0	0	1	0	0	9	0	0	0	0	0	0	2	0	0	8	0	0	0	0
ASTN1	1357	0	0	0	0	0	0	0	0	0	2	0	0	0	199	0	0	0	0	0	0	0	1	0	232	0	0	0	0	0	0	0	0	2	255	537	0	0	0	2	158
LOC730102	0	0	0	0	0	0	0	0	16	0	0	0	0	0	0	0	0	0	0	0	0	0	9	0	0	0	2	0	0	0	7	0	0	0	0	0	0	0	0	0	0
RALGPS2	195	12500	160	20626	72	13553	14	16802	597	17288	4	17664	838	11148	0	18763	44	22303	322	14984	131	17753	8	15308	362	17800	30	30239	26	10735	40	11019	67	23	42	20	25	113	138	16856	810
FAM20B	1055	738	134	662	342	537	80	739	817	908	0	412	1	648	882	1155	161	1054	651	509	242	581	417	689	839	336	388	1084	1085	498	342	771	1320	1213	1074	3365	684	519	1939	738	522
ABL2	580	565	114	875	702	302	59	846	126	832	83	691	0	758	186	827	539	1813	804	819	397	860	657	1017	968	1603	410	1716	1889	556	954	750	569	1446	1050	971	1326	756	1041	907	480
AXDND1	134	9	140	79	51	63	105	0	11	9	0	53	0	0	332	23	963	36	20	2	3	20	2	16	12	23	33	33	0	17	69	5	4	1	1290	705	2	2	6	22	0
TDRD5	0	0	0	0	0	0	0	0	0	0	0	0	0	0	0	0	0	0	0	2	0	0	0	1	0	0	0	0	0	0	0	0	0	0	79	235	0	0	0	0	0
FAM163A	48	0	0	0	0	0	0	0	0	0	0	0	0	0	0	0	0	0	0	0	0	2	0	2	0	20	2	0	0	0	0	0	0	0	0	0	0	0	0	0	0
TOR1AIP2	1178	1022	991	682	1096	1025	1045	1102	1157	932	1039	1400	368	646	1570	637	822	3672	7296	1538	2300	3740	6127	2450	4556	3070	7603	4270	11564	1330	4563	3103	5168	6228	7069	4336	5916	5182	2616	1087	3212
CEP350	5680	6064	1748	8145	5066	6404	1909	6974	3540	5400	3447	6691	6221	3898	11922	7526	3425	7406	9938	7257	5171	5210	8240	6894	5999	8611	4005	12568	40200	4258	8767	4450	8715	4718	3289	2019	4685	6358	8485	6270	7340
LHX4	0	25	0	82	7	0	0	5	0	51	10	66	0	11	0	1	0	19	6	8	2	4	5	36	14	18	2	13	53	1	9	0	23	0	29	57	19	11	49	10	0
XPR1	340	474	167	832	685	1297	265	1115	1020	387	84	294	2494	1047	1650	447	56	1070	1495	548	623	579	699	604	1495	541	244	1018	1636	469	1271	485	826	961	771	1983	627	777	2164	453	668
MR1	1817	4804	1455	5121	963	3694	1245	4214	3259	2262	2948	4061	1813	2342	3651	3951	72	2663	2736	3256	1709	2202	1335	1836	1456	1694	867	3867	13109	1887	329	1830	1674	2475	1091	1558	587	597	810	2823	576
CACNA1E	170	0	0	50	1882	0	0	137	61	2	1893	0	0	416	3597	0	370	0	547	11	904	2	5	10	8767	2	654	56	1058	2	34	15	1473	17	34	64	909	0	4	26	4386
LINC01344	0	0	0	0	0	0	0	0	0	0	0	0	0	0	0	0	0	0	0	0	0	0	0	0	0	0	0	0	0	0	0	0	0	0	4	0	0	0	0	0	0
DHX9	6545	6998	7538	7714	8040	4221	6768	5207	8829	7699	7411	5798	2243	3065	9219	5673	3695	7864	11072	6382	10554	5195	7200	4380	15631	4781	5640	4992	12835	2853	9465	2839	4570	5946	12494	17285	10487	15586	17856	4255	9267
LAMC1	824	921	509	816	187	1507	161	1214	902	1104	116	1066	0	477	50	1632	0	1120	1546	1037	403	1178	1058	645	670	1629	734	1109	368	659	1002	587	460	8	2092	6204	2	1408	2515	643	1006
NMNAT2	14	0	0	0	0	0	0	0	0	0	0	0	0	0	0	0	0	0	44	0	24	0	18	0	0	0	0	0	0	0	8	0	0	0	0	8	0	0	0	0	20
RGL1	723	2	119	0	672	166	122	0	557	0	286	0	0	0	8	14	168	4	429	27	168	23	797	28	223	178	353	48	1913	8	548	0	34	278	666	975	2009	267	332	6	178
TSEN15	5581	2422	10663	2130	12950	657	12378	2121	9073	2177	15357	2925	5840	2102	19146	2117	4644	575	3614	769	4255	1039	6005	819	2755	601	4015	1311	9979	916	7015	746	2726	4899	5819	4303	3107	3215	3378	543	657
EDEM3	950	756	557	1410	1423	729	672	618	714	1213	680	697	0	1315	992	825	86	1829	2109	1043	1362	2002	3190	1045	1460	1243	1749	3518	6114	571	2341	1680	1165	1847	2244	2868	1248	1903	1303	897	2050
FAM129A	2355	375	1344	262	695	175	3538	1036	4828	386	4716	152	5150	1212	6931	649	3116	233	2026	190	3977	281	2806	224	4095	200	3601	1362	14952	166	2886	34	1860	4832	4708	9569	1789	3421	8782	144	1641
SWT1	202	190	176	165	66	54	18	144	1759	656	143	412	38	67	16	207	64	582	946	447	419	385	112	458	211	716	156	466	1423	253	453	265	1522	774	261	142	273	142	156	217	61
HMCN1	0	0	378	0	184	0	202	0	294	0	68	0	405	0	164	0	807	2	484	1	1181	2	29	7	48	0	1480	0	214	0	16	2	198	4	1916	239	46	2	5	4	0
C1orf27	1565	2011	1650	1442	3193	1447	1232	1801	3042	1416	2894	1239	0	1800	3729	1748	2438	1952	3538	1246	2484	1526	1729	1396	2336	1407	3564	2473	6128	950	2471	808	1370	1998	2381	880	2856	2839	1148	1546	630
PLA2G4A	164	2	10672	2	17531	4	6316	0	5324	0	3473	0	4858	1269	23442	2	6698	6	11164	11	9071	44	13524	11	4470	12	10122	7	30299	5	14	16	5055	4146	8	0	12935	12729	8013	13	195
LINC01036	0	0	169	0	55	0	5	0	0	0	0	17	0	0	0	0	35	1	2	2	44	1	54	0	0	0	70	0	0	1	5	0	0	55	0	0	0	44	27	4	0
LINC01037	0	2	215	0	49	0	33	0	0	4	0	31	0	0	0	3	17	0	1	7	58	0	74	3	0	0	154	0	22	8	9	0	0	109	0	0	1	101	25	2	0
BRINP3	0	0	0	0	0	0	0	0	0	0	0	0	0	0	0	0	0	0	0	0	0	0	0	0	0	0	0	0	0	0	0	0	0	2	340	363	0	0	0	0	0
LINC01351	0	0	0	0	0	0	0	0	0	0	0	0	0	0	0	0	0	0	0	0	0	0	0	4	0	0	0	15	0	0	0	0	0	2	166	88	0	0	0	0	0
LINC01720	0	0	0	0	0	0	0	0	0	0	0	0	0	0	0	0	0	0	0	0	0	0	0	0	0	0	0	0	0	0	0	0	0	0	43	0	0	0	0	0	0
RGS18	0	0	0	0	0	0	0	0	0	122	0	0	0	0	232	158	0	0	58	0	10	26	0	0	0	0	0	2	10	8	2	0	115	0	0	2	0	0	3	0	0
GLRX2	1146	340	2536	531	2730	216	1354	447	3454	221	1542	618	608	340	1433	620	1923	33	159	68	302	131	302	86	426	110	291	390	232	244	350	84	176	671	432	500	754	619	300	28	89
CDC73	5166	4714	3917	4097	4040	2965	1853	4203	5119	4031	4161	3875	2732	2777	6706	3637	3043	2133	3031	1585	1672	2141	2287	1839	2944	2001	1543	3248	4854	1323	2293	1375	2690	3009	2157	1978	2601	5319	3077	1514	1965
LINC01031	0	11	0	0	0	0	0	0	35	0	0	0	0	0	0	0	0	0	1	3	0	1	11	0	4	0	0	0	16	5	0	0	0	2	0	1	0	4	0	2	5
KCNT2	50	0	0	0	0	0	0	0	0	0	0	0	0	0	0	0	0	0	0	0	0	0	0	0	713	2	0	0	0	0	0	0	0	0	8	0	0	0	0	0	228
CFHR4	0	0	0	0	0	0	0	0	0	0	0	0	0	0	0	0	0	0	0	0	0	0	0	0	1	0	0	0	0	0	0	0	0	0	0	0	0	0	0	0	0
CRB1	1	74	19	110	9	57	376	88	6	154	486	104	0	83	0	74	73	43	10	40	13	7	6	44	30	54	27	40	17	86	20	6	26	67	497	266	109	1	0	58	0
DENND1B	2175	1306	1837	2090	2968	2472	1041	1436	2333	1158	1229	1937	202	2049	2035	1765	1099	1125	1232	601	788	1044	1483	661	605	581	443	1571	3943	540	1225	806	4690	1663	1261	1377	764	714	1388	802	1630
PTPRC	44612	115762	880	78700	436	45096	826	64809	5245	59858	2754	80452	9945	27600	304	88948	344	105164	33386	84862	4286	70456	1823	51400	6944	46007	255	93013	11264	34142	316	41031	2187	573	2568	2402	3478	192	254	60351	5330
MIR181A1HG	98	199	0	408	743	544	295	473	343	299	391	94	0	122	961	267	575	306	240	263	412	84	179	113	59	515	1027	243	324	190	1	91	4	142	229	2	46	14	0	53	85
LINC01222	0	0	0	0	0	0	0	20	0	0	0	0	0	0	0	0	0	0	0	2	0	0	0	0	0	0	0	0	0	0	0	0	0	0	0	0	0	0	0	0	0
NR5A2	0	0	14	0	490	0	12	0	142	0	0	0	0	0	0	0	0	0	721	37	464	30	1092	41	48	0	417	33	4154	0	49	2	59	1070	25	45	2	4	0	2	10
KIF14	893	7	640	148	2193	0	1389	250	1953	0	3108	22	242	331	1635	12	841	115	2594	44	644	57	2490	9	4498	7	1321	294	3579	22	1164	8	1081	1969	4107	2790	2181	3729	5574	2	1935
CAMSAP2	336	0	284	0	786	0	704	57	495	0	477	0	1065	0	1888	0	577	57	1790	8	1055	7	1406	67	2735	16	2881	16	5945	31	338	4	113	1441	3478	5174	153	1229	1035	20	1110
CACNA1S	0	0	0	0	0	0	0	0	0	0	0	0	0	0	0	0	0	0	2	0	1	0	10	0	3	0	0	0	0	0	525	0	0	0	1	0	0	0	0	0	0
IGFN1	0	0	0	0	0	0	0	0	0	0	0	0	0	0	0	0	0	1	0	3	2	0	0	0	0	0	0	0	0	0	0	0	0	0	1	1	0	0	2	0	0
CSRP1	36933	2411	5813	667	10448	1086	23077	2342	10871	2245	8936	1960	7720	1745	26364	3382	6377	850	4871	561	1650	658	4555	881	5741	314	1108	378	7608	831	5544	168	1914	5696	7457	20831	2127	1372	1731	636	2077
NAV1	4705	44	4	123	3754	0	1856	241	1786	308	689	299	4669	220	3699	138	6633	404	7764	232	4950	223	286	415	7504	307	2107	42	5226	183	10377	55	164	262	6889	13431	85	53	21	218	1766
IPO9-AS1	14	17	88	12	38	37	174	19	56	60	39	0	0	69	50	27	104	2	9	0	0	3	1	7	8	0	5	7	15	5	9	1	7	7	23	30	1	0	4	0	0
IPO9	3571	4170	3879	2610	5328	3902	6470	4225	5754	3154	3587	4840	112	1851	5460	5756	2372	4703	6122	3393	2798	3551	4282	4990	8608	2580	2087	5232	9408	1586	5987	1645	2405	5181	16822	14451	4095	4574	4735	2863	2780
ELF3	265	0	0	0	147	0	0	0	0	42	0	0	0	0	0	6	0	24	38	0	0	18	0	31	18	100	0	0	0	4	2228	0	0	54	0	25	14	15	2	0	10
ARL8A	1077	1412	330	1405	964	389	309	1446	1581	2428	688	1176	612	718	1279	1495	260	192	141	57	22	90	120	208	142	110	12	178	338	295	146	136	272	137	162	2660	140	70	497	35	19
LGR6	144	0	0	0	0	0	0	0	0	0	0	0	0	0	0	0	0	0	40	0	0	14	0	0	7	0	0	0	0	6	803	0	0	0	0	0	0	0	0	0	0
SYT2	284	0	0	0	15	0	0	0	32	0	0	0	0	0	0	32	0	25	2	60	0	22	2	128	20	0	0	2	210	17	25	0	44	6	69	44	24	21	3	39	0
KDM5B	914	4137	20	2369	203	1876	213	2079	194	3054	295	4002	0	2587	356	3751	0	1890	731	1308	385	724	20	1017	1052	1280	347	2187	2300	535	34	854	74	177	0	0	52	0	5	1282	30
PPFIA4	0	74	0	0	0	0	0	0	0	178	0	78	0	0	0	136	0	3	14	20	0	4	0	3	0	8	0	16	0	10	36	6	10	198	0	4	155	2	13	20	24
ATP2B4	2154	240	276	631	4907	143	1146	82	2529	99	1032	23	454	216	4126	252	2684	734	9624	356	4926	480	4198	445	8669	391	2919	1005	15136	316	11512	220	6811	16603	5732	5817	5191	183	775	809	2452
ZC3H11A	2729	4336	1796	6424	3559	2966	1777	3677	3382	5270	2383	5047	3382	2988	2532	5797	1857	11463	9446	8653	4470	8862	6284	7001	8466	7851	3275	9363	11739	3879	9070	4736	3993	7594	9018	9122	6349	6591	5069	7355	3788
SOX13	0	0	0	0	1397	2	2963	0	0	0	175	0	44	326	1675	0	1626	0	1293	0	902	0	390	2	1012	0	410	0	449	0	2272	0	0	280	157	853	10	0	0	0	2
PLEKHA6	0	104	0	0	0	270	0	0	0	0	0	0	0	223	0	13	0	68	12	12	0	64	0	76	7	80	0	150	0	18	90	34	2	0	8	4	4	4	2	30	0
LRRN2	0	16	0	12	0	86	0	50	0	3	0	43	0	0	0	2	0	29	2	15	2	23	0	25	1	0	0	0	0	0	0	0	0	0	0	4	0	0	0	19	0
NFASC	1340	0	0	0	249	0	0	0	0	0	0	0	0	0	0	0	0	1	135	4	101	4	0	17	757	1	2	4	0	6	898	0	0	0	355	1416	1	0	21	9	227
DSTYK	397	1907	226	1417	1249	1264	577	1392	490	2742	406	1475	0	928	1054	1984	172	2290	1102	1492	570	1076	757	1102	1126	939	244	1643	2020	769	1444	870	508	733	1315	1097	1173	462	529	1377	168
LEMD1	0	0	0	0	0	0	60	0	199	0	0	0	0	0	0	2	0	0	103	0	94	8	0	0	0	0	0	0	0	0	7	0	0	40	0	0	0	0	0	0	0
RASSF5	9974	14645	2	9763	703	8172	1242	11526	2585	9575	1308	14203	0	5394	14	19079	3538	3704	2211	3908	1067	3596	90	2767	706	3109	676	3908	2900	3695	1442	4212	541	1125	224	552	1797	401	1236	3193	2182
FCMR	10977	126268	876	71557	250	77294	279	116641	2436	83057	2531	130230	4844	49745	8	151843	65	13786	933	19752	399	13446	12	14213	401	19855	23	24213	949	19625	52	7401	366	20	20	0	10	6	0	12312	34
YOD1	320	154	416	386	572	114	160	378	692	548	506	198	0	716	64	119	522	525	226	227	198	187	370	180	741	311	1428	550	1786	200	176	236	528	675	650	574	837	1270	984	175	348
CR1	142	5578	247	7465	0	1987	87	4159	69	4894	2	4734	0	1627	0	3462	0	7900	50	4933	89	6401	5	7224	52	4982	11	11763	105	4375	20	4772	17	12	4	0	4	6	0	7199	69
CR1L	515	30	1	52	0	5	1	69	2	18	0	38	0	7	4	27	2	23	0	5	0	8	4	23	36	7	13	3	1	5	1	4	476	0	0	0	98	0	0	13	105
PLXNA2	0	0	0	154	0	0	0	120	0	4	0	0	0	0	0	0	0	45	0	70	0	15	0	2	19	103	0	159	12	6	0	22	5	81	34	84	2	28	12	2	152
LOC101930114	763	27	0	10	32	0	13	0	110	0	320	0	0	0	0	0	0	5	50	1	69	2	21	6	0	16	0	0	37	11	0	0	1	46	0	2	10	3	2	1	0
IRF6	0	88	0	100	0	0	0	0	0	0	18	0	0	0	0	0	0	111	0	49	0	58	22	52	4	62	0	0	122	18	0	28	0	0	0	2	18	0	0	15	0
SYT14	0	0	14	0	0	0	0	0	0	0	0	0	0	0	0	0	0	2	71	0	0	0	0	0	0	1	0	2	0	0	3	0	0	0	65	5	155	0	4	0	0
KCNH1	17	0	0	0	0	0	0	17	0	0	0	16	0	159	0	0	0	4	0	10	0	2	0	15	0	75	0	0	0	2	0	3	8	0	6	5	6	2	18	12	0
LPGAT1	1439	2448	659	2805	889	1490	895	2651	1895	3634	716	2328	124	1386	1069	2337	888	3202	1306	2165	328	2882	842	2092	907	2887	568	4358	3091	1751	1356	2203	2815	3049	6398	6041	3960	1604	1626	2733	1034
INTS7	2715	2433	1047	1471	3181	690	2838	1484	5362	1121	3099	1468	2726	1388	3512	1117	2348	1232	2829	900	2341	1256	2860	826	3026	742	1960	1290	7430	537	3409	751	2838	4709	4871	4216	6677	6303	3810	605	1857
PPP2R5A	2289	3100	1376	4013	2243	2130	1095	3025	3132	4034	2348	3045	142	1120	1107	4303	3010	2139	1559	1279	563	1248	372	1445	782	1886	916	2365	4264	1293	1594	1790	2068	1062	1252	3113	1710	1174	3597	1280	1615
RPS6KC1	601	761	623	1092	659	405	308	598	737	315	108	556	0	653	812	563	294	490	429	299	687	399	379	340	470	570	1598	1105	1143	194	522	295	806	1163	1474	2595	841	608	631	333	321
PROX1-AS1	0	0	0	0	0	0	0	0	0	0	0	0	0	0	0	0	0	0	3	0	0	0	0	0	3	0	2	0	0	0	0	0	0	0	0	30	0	0	2	0	0
PROX1	21	0	0	0	0	2	0	0	248	0	0	4	0	98	0	34	0	0	216	60	40	12	0	106	692	4	0	6	114	44	18	2	2	0	626	296	14	70	22	258	12
PTPN14	238	0	606	10	0	0	218	0	0	136	0	9	0	0	8	0	0	20	128	12	44	14	0	35	130	20	0	28	129	12	0	28	22	42	148	108	64	34	2	10	108
CENPF	12737	843	12375	692	7147	466	4968	1205	8226	1080	6400	146	4514	370	13071	498	5793	804	11443	328	6347	278	8683	134	20689	217	6706	733	21916	198	10209	99	8186	12123	18875	12355	12352	12125	12598	137	9032
KCNK2	0	0	0	0	0	0	0	0	0	0	0	0	0	0	0	0	0	0	0	0	0	0	0	0	0	0	0	0	0	0	0	0	0	0	84	30	0	0	0	0	0
KCTD3	1035	156	1864	288	1145	257	761	174	871	16	1466	136	480	215	1745	780	380	123	842	30	808	282	1157	134	1383	78	371	23	2956	125	357	191	335	407	9944	4113	1237	990	2240	183	347
GPATCH2	1509	948	1010	1542	1551	1417	1119	1362	1127	633	1599	1257	1862	2208	4245	1288	2516	1074	2014	1174	2244	819	1232	799	1969	1282	1550	1843	4207	547	481	613	1147	1154	2830	1692	1922	1294	943	671	927
SPATA17	0	0	0	0	32	0	10	4	30	0	40	0	100	12	188	0	0	2	69	5	61	4	0	1	68	14	114	0	272	4	0	0	8	52	118	62	65	22	6	2	0
RRP15	1746	1678	2100	1411	1989	1264	1564	1695	2396	2503	2790	2074	586	806	2389	1292	398	3279	2059	1622	1458	4137	2231	2920	2338	2121	2668	4844	2433	1719	3320	2901	2423	2991	1553	860	5955	2052	1091	985	1266
LYPLAL1-AS1	91	30	0	0	0	51	4	0	0	26	0	37	0	144	0	0	0	77	0	25	3	15	2	39	0	48	2	8	0	4	4	20	0	25	11	7	64	0	0	23	0
LOC102723886	12	0	66	3	0	0	0	0	0	0	0	0	0	0	0	0	0	2	49	0	42	2	0	4	3	0	589	2	0	0	0	0	165	1	252	83	15	315	195	1	0
RAB3GAP2	931	1644	1486	2864	1434	1765	886	3015	1961	2297	2596	3166	5183	2555	1992	2734	1015	5805	4171	3877	3075	5261	2939	4304	5372	4369	1999	5236	9209	2477	4440	3071	3281	3720	3200	3097	4592	4208	3867	3315	6225
MARK1	301	0	744	6	516	45	225	0	24	0	548	0	0	76	1584	108	400	7	401	8	337	38	18	83	898	0	709	60	1698	14	1078	30	474	0	972	2060	0	303	523	33	915
2001-03-01	1311	79	0	0	0	0	0	0	0	65	374	0	0	107	79	15	0	28	442	4	217	2	8	5	49	0	124	62	512	0	80	2	14	10	36	10	162	91	66	4	6
DUSP10	3988	2315	0	4022	3709	8133	9948	3364	2165	19848	8833	3562	0	3214	4903	3478	3801	3509	4986	3001	3378	1812	1921	1018	1808	4416	3526	3411	8392	1480	4457	8269	1038	2667	1934	879	778	476	375	1440	3341
MIA3	5095	6339	930	7926	2391	5197	2713	6435	3901	9081	3744	7530	1672	5596	3804	8783	1222	8416	4512	6697	2952	5794	2213	8216	3599	4904	2167	9068	11502	2694	3700	3634	2873	3300	4413	5209	4225	2121	2671	4461	1925
DISP1	114	545	16	579	23	352	27	349	87	896	127	794	112	1444	0	1038	0	678	94	638	140	360	20	465	195	382	204	1089	278	323	134	452	25	633	322	421	219	67	38	490	54
SUSD4	2243	0	0	0	0	0	0	0	0	210	0	0	0	0	0	0	0	0	974	0	366	0	6	4	5153	39	0	0	5	2	1	0	2	0	0	0	640	44	14	16	1935
CAPN8	0	0	0	0	0	0	0	0	0	43	0	2	0	0	0	0	0	0	0	0	0	1	0	0	0	0	0	2	0	0	53	0	7	0	0	0	2	0	4	2	1
TP53BP2	2895	1100	4330	1253	5215	1283	1330	1419	8938	3608	4266	2107	1086	615	7210	1375	3769	747	3521	690	1307	497	3003	758	1049	870	1708	1744	8146	339	4603	974	2547	2938	2709	6726	5214	2471	6470	688	3569
CNIH3	258	36	50	22	134	16	139	184	85	142	111	126	4	205	206	126	33	27	34	9	114	27	42	84	132	67	6	63	146	69	67	9	44	60	21	21	179	18	7	8	62
ENAH	197	12	264	126	456	6	544	0	588	20	318	214	997	118	42	140	802	581	58	354	38	345	128	56	489	695	0	173	176	291	20	268	446	28	3915	3424	153	751	557	128	0
SRP9	18026	13623	13602	10673	13736	4514	12224	10892	13976	5043	15161	11525	6180	4668	20857	8799	8738	12800	18102	10081	17245	16964	13756	6942	25100	7709	19186	12910	26218	5758	18975	12114	16365	33383	42864	14413	38085	22337	9360	7529	7687
ACBD3	2504	3548	502	3792	1185	4645	2397	4608	2841	5260	1073	4575	2402	2164	3122	4567	2748	2094	2130	1846	1068	2274	1305	1446	998	1645	794	1598	3192	1349	1730	1597	1357	1425	2478	4374	3520	1357	2066	915	927
STUM	0	0	0	42	0	36	0	0	0	12	0	0	0	0	0	0	0	0	0	7	0	11	0	0	0	0	0	4	0	16	0	0	0	0	0	0	0	0	0	2	6
ITPKB	7068	2065	129	1657	502	2010	1510	3390	1170	4851	1946	3666	80	3358	1110	4356	347	771	865	886	1041	868	37	482	2857	609	276	971	1955	642	828	665	1684	162	132	872	842	2	0	621	1572
COQ8A	7195	7024	534	1984	1306	2955	1626	4525	3236	3535	2193	6927	2936	3989	8507	7653	445	446	302	413	297	495	344	775	783	181	366	597	540	459	775	628	610	559	1270	7851	691	193	432	376	386
CDC42BPA	0	4	719	96	275	0	712	110	1311	31	316	104	0	384	779	46	1931	2	362	19	26	0	1909	26	1859	0	23	5	2256	8	93	70	78	4	308	447	137	808	3108	6	1990
ZNF678	76	548	0	1381	76	769	33	1280	52	108	45	1662	0	306	838	607	0	1389	658	1580	499	1286	766	1092	1899	1209	620	1937	1710	503	1489	653	574	388	860	604	735	779	353	1293	734
SNAP47	9757	4115	3330	1403	2206	2243	3865	3188	4364	3656	3306	3160	1870	2451	6258	4022	3479	450	635	443	608	348	398	389	841	354	212	538	828	388	1051	553	540	1455	1219	2375	3780	1172	859	302	114
WNT3A	0	0	0	0	0	32	0	27	0	20	0	0	0	0	0	0	0	8	0	0	0	0	0	0	0	0	0	1	0	0	2	6	2	0	0	0	0	0	0	0	0
OBSCN	182	324	0	427	10479	641	9499	602	0	1020	202	1910	0	1055	1225	1102	5110	54	87	93	82	175	0	113	106	111	176	416	6	112	461	70	22	90	82	1507	43	75	210	31	2
RHOU	128	0	18	0	0	0	82	0	79	0	31	0	0	0	1075	0	0	1	10	0	138	4	264	0	30	0	0	0	4	0	299	0	52	1896	28	10	134	0	34	0	44
URB2	646	216	902	260	452	154	358	1027	97	1195	444	512	372	0	722	703	0	376	441	216	553	338	611	372	611	132	1333	284	790	160	701	221	735	433	2268	3379	1880	1378	2481	320	641
GALNT2	2879	1824	3823	1143	1316	1403	1021	1636	4743	2363	1893	1870	768	838	1392	1683	36	351	383	359	337	270	98	346	705	298	218	507	153	474	753	224	940	1642	892	9822	450	199	1728	277	63
PGBD5	0	0	0	0	788	0	450	0	594	0	382	0	0	0	420	6	864	0	71	0	12	0	2	0	76	0	0	0	0	2	70	2	477	2	146	705	213	2	18	0	6
COG2	3351	3214	3309	2608	3380	2295	3771	3220	3317	1740	1226	6409	1640	1646	3054	2845	2054	2479	4260	1665	1758	2122	2607	1677	2105	1240	1811	2812	4624	899	4230	1695	2613	4584	3189	2589	4863	1645	1487	1560	1485
TTC13	787	2833	1305	4546	870	2874	169	4311	711	2576	1503	3406	658	1900	2298	3896	593	2477	730	997	267	1514	479	2053	835	1770	788	2870	1257	808	680	1797	350	758	728	2114	1207	250	471	1183	583
TRIM67	36	0	0	2	100	0	28	30	0	0	0	20	0	0	0	2	44	0	74	0	31	0	0	13	46	6	0	0	0	0	0	0	0	0	0	0	0	0	4	0	64
EXOC8	481	146	401	470	472	355	398	551	480	608	169	951	12	651	826	692	1	895	822	658	446	483	627	576	748	1406	826	697	2733	662	740	1290	754	750	961	1012	2359	1327	1360	328	530
DISC1	33	68	0	100	0	26	0	16	0	56	0	20	0	6	0	21	0	46	19	40	22	30	5	40	22	17	9	80	81	33	0	8	4	26	2	0	0	2	0	34	18
PCNX2	493	52	356	170	456	17	111	117	390	315	333	532	259	702	710	385	458	302	819	144	388	210	220	447	634	137	237	493	334	264	550	72	485	325	102	348	407	231	638	169	125
SLC35F3	905	30	0	0	1893	0	142	0	0	0	6926	0	10	570	13734	0	0	0	151	1	315	2	66	0	9	0	597	0	1405	3	964	0	79	2133	0	0	1199	0	0	2	0
TOMM20	3357	2554	4218	3702	5076	3092	3971	3310	5397	6746	3565	3162	3180	3292	6229	2836	3133	5014	4940	3104	4784	3230	3636	4198	4164	2958	3490	2926	5271	3326	4593	2770	4538	3756	3911	6747	8249	7764	8726	2509	3144
ARID4B	20114	17568	6475	24149	5758	23415	4574	25219	9436	28217	9777	24846	3558	26453	12959	23150	3099	12592	7316	9041	4359	7089	2975	11034	5527	9581	4603	20346	17727	5994	6597	6737	3727	3784	1541	784	5514	2586	2106	6901	3667
TBCE	1605	1234	601	1705	2647	585	2427	1853	3092	1028	1892	1145	1832	1006	4297	1278	654	727	2583	566	1950	541	1108	489	1109	687	1764	903	1828	329	1495	462	770	1914	978	687	5095	1488	874	300	207
B3GALNT2	632	378	340	660	944	491	494	325	569	363	683	346	146	376	1811	460	1944	783	991	80	129	410	584	512	757	727	1982	952	2080	364	1235	567	1343	1886	753	910	2983	1289	823	141	319
GNG4	945	51	222	0	0	2	0	68	360	32	0	0	1554	0	0	0	0	0	492	0	78	0	0	0	52	0	126	1	2	0	101	0	24	524	26	256	14	114	46	1	2
NID1	3007	0	0	0	0	0	0	0	0	0	0	0	0	0	0	0	0	0	26	1	2	0	0	3	0	0	8	2	15	0	0	0	1	8	1	6	0	0	0	0	78
GPR137B	3951	1091	0	576	126	162	4	762	5463	661	1191	629	465	1052	739	597	12	264	2318	88	2787	65	21	183	561	323	408	490	844	147	1156	106	1259	170	18	2	531	82	71	72	769
EDARADD	6674	2134	7158	1554	6976	1016	8138	2180	7251	1650	7576	1906	4538	792	4757	1436	5280	208	2113	305	1885	222	1055	180	4519	144	1078	692	6926	38	1520	242	1136	2166	1818	3077	2365	2394	1355	194	651
LGALS8	2450	3484	1554	2771	558	1137	30	3438	1297	2053	1542	1334	1244	790	965	4074	299	3550	1362	2681	1609	2379	68	2183	762	2077	87	3213	5279	1351	1844	1994	371	4185	205	335	1609	406	117	1787	437
HEATR1	2050	1021	1051	1791	2411	1136	1305	1959	2095	1480	1343	1939	0	869	1085	1117	5295	2494	3936	2621	4187	2400	3140	1983	3057	2376	2584	6179	7025	1283	3557	1029	2740	2501	4072	2845	7626	6167	6206	2710	3581
RYR2	0	0	472	0	351	0	3477	0	181	0	531	0	0	209	577	0	360	15	12688	6	7155	2	1134	13	18954	16	6509	4	14569	85	23644	0	331	7506	484	246	746	4101	2044	2	7
CHRM3	2	0	0	0	0	2	0	0	0	22	0	0	4	2	0	5	0	26	0	0	0	0	0	15	0	2	0	2	2	0	0	2	0	0	8	2	436	0	0	0	2
FMN2	0	0	0	0	0	0	0	0	0	0	0	0	0	0	0	0	0	0	0	2	0	0	0	2	26	0	0	0	81	0	0	0	4	16	0	2	28	6	9	0	0
KMO	174	8586	143	5955	585	3041	0	5666	299	4083	2401	6641	752	4417	433	7482	35	9085	700	4245	1155	6250	574	3717	466	6613	3637	6160	1621	3416	407	6058	18	76	229	90	226	75	61	3578	239
WDR64	0	21	0	21	0	0	0	11	0	0	0	6	0	120	50	6	0	30	26	52	9	16	24	68	3	17	252	0	462	16	7	0	11	2	0	5	2	1	9	72	0
PLD5	63	0	4	0	0	4	205	0	0	0	0	12	0	129	776	72	50	0	0	0	33	0	0	8	78	49	80	2	282	2	0	0	0	1373	163	119	6	323	365	1	0
CEP170	1767	2420	203	4361	1355	1832	703	3563	1188	3212	705	2312	106	2487	1199	2197	196	3356	2616	3417	1505	3263	1989	2995	3502	3166	1183	4395	6050	2061	2353	1621	2076	2640	2454	1894	2472	2741	2103	2944	1419
SDCCAG8	2205	3875	1096	5563	1488	4666	866	4901	1902	5618	2280	5010	0	4225	1848	5373	963	3387	2352	3888	1838	2719	661	3566	1937	3202	2279	6714	5334	3156	1721	3053	1474	1533	2111	889	1053	757	421	3275	875
AKT3	567	136	429	289	450	130	118	419	466	183	186	603	116	472	588	112	96	645	2036	529	1105	419	1189	748	1216	486	343	1300	2507	312	1889	376	1027	1317	2367	4442	614	1067	1596	993	358
LOC339529	0	2	0	23	0	138	21	16	0	19	39	0	0	66	0	10	0	50	19	39	4	38	0	54	9	59	0	34	0	44	3	9	1	0	1	0	0	0	0	42	0
ADSS	1049	3072	1288	2394	2327	1285	1239	2123	1849	2424	1511	3448	2382	791	1916	1782	1522	2047	1183	1037	1405	1569	948	1380	1686	475	969	2186	2513	826	1538	1517	1622	1721	2842	4662	2138	1876	2434	944	1706
C1orf101	135	42	0	78	13	6	6	74	6	388	29	92	0	405	212	394	0	140	9	27	22	89	36	146	27	187	22	109	41	57	75	22	2	31	38	9	13	9	9	133	2
DESI2	1932	1563	990	1556	2350	819	667	876	1589	1164	151	1188	82	363	1387	1143	933	728	937	513	505	528	783	535	853	654	157	505	1497	479	971	584	1054	1731	2571	4666	1575	1316	2448	552	1264
EFCAB2	631	135	388	143	251	335	328	198	124	403	250	131	0	444	122	145	400	95	60	134	104	172	266	124	177	84	0	192	1133	83	367	366	514	41	4	20	82	105	27	149	80
CNST	3941	3633	297	4929	1735	4281	1107	6546	1487	8029	1905	3115	3926	3999	3828	6751	2997	4940	1862	3906	912	4042	1133	2669	1020	3831	1335	6087	1458	2080	1568	2771	1149	1344	2609	1939	1473	1745	735	2518	1450
AHCTF1	879	1257	1050	2074	2057	798	657	1108	1078	1945	2110	1536	380	1300	1379	662	1055	2804	3194	1639	1627	1642	2630	2206	2183	2454	2593	3266	3935	1241	2411	1482	2979	2273	4244	5461	4503	5181	5243	1749	4049
ZNF670-ZNF695	0	0	0	2	0	0	0	0	0	0	3	0	2	0	0	0	0	0	0	0	0	0	1	0	9	0	0	0	0	0	0	0	0	0	0	0	6	16	3	0	0
ZNF670	435	511	370	240	468	0	0	597	360	0	115	345	264	262	0	488	0	414	297	328	268	378	272	248	928	114	2	409	404	79	434	499	108	1119	3423	1118	1369	1616	470	182	572
ZNF124	300	711	640	577	496	230	188	374	240	282	524	540	0	174	962	744	690	1027	758	972	772	958	605	532	1637	752	727	1412	2055	602	794	782	949	172	3651	1086	1067	1739	557	365	502
NLRP3	0	36	4	22	0	0	162	394	0	0	0	0	4	0	0	0	0	18	14	2	4	7	0	59	6	22	0	143	0	2	630	40	0	1309	0	52	4	17	2	0	0
GCSAML	0	88	0	0	0	22	0	4	14	0	0	0	0	0	0	0	0	0	0	2	0	0	0	0	0	0	0	10	0	14	0	0	0	0	0	0	0	0	0	0	0
OR2L13	6	115	30	196	15	5	0	46	73	70	36	351	0	15	233	135	68	36	5	27	1	17	5	51	1	64	1	23	0	122	6	44	13	0	5	2	2	22	4	43	40
DDX11L1	0	0	0	0	4	6	0	0	0	4	0	0	0	0	0	8	0	0	8	0	0	0	0	2	2	0	0	0	0	0	0	0	0	0	0	0	0	0	0	0	0
WASH7P	179	153	182	201	98	439	141	490	194	336	145	195	153	688	157	369	197	67	69	52	26	105	32	156	66	108	103	62	16	118	96	82	63	35	61	136	39	25	27	23	10
MIR6859-1	5	4	3	5	0	8	0	4	4	4	0	14	12	41	12	25	4	0	0	0	0	0	0	0	0	0	4	0	0	0	1	0	0	0	0	0	0	1	0	1	0
MIR1302-2	0	0	0	0	0	0	0	0	0	0	0	0	0	0	0	0	0	0	0	0	0	0	0	0	0	0	0	0	0	0	0	0	0	0	0	0	0	0	0	0	0
FAM138A	0	0	0	0	0	0	0	0	0	0	0	0	0	0	0	0	0	0	0	0	0	0	0	0	0	0	0	0	0	0	0	0	0	0	0	0	0	0	1	0	0
OR4F5	0	0	0	0	0	0	0	0	0	0	0	0	0	0	0	0	0	0	0	0	0	0	0	0	0	0	0	0	0	0	0	0	0	0	0	2	0	0	0	0	0
LOC729737	5	104	85	108	4	322	180	266	688	89	0	177	600	248	410	144	111	52	113	292	95	435	28	485	214	50	3	771	291	159	257	60	456	4	222	659	14	5	34	249	54
LOC100132287	3	0	0	1	2	0	0	1	0	1	0	0	0	0	1	3	6	0	4	1	3	5	5	5	0	8	0	6	3	2	1	3	6	6	0	8	7	1	6	2	0
OR4F29	0	0	0	0	0	0	0	0	0	0	0	0	0	0	0	0	0	0	1	0	0	0	0	0	0	0	0	2	0	0	0	0	0	0	0	0	0	0	0	0	0
LOC101928626	0	0	0	0	0	0	0	0	0	0	0	0	2	0	0	0	0	0	0	0	0	0	0	0	0	0	0	1	0	0	0	0	0	0	0	0	0	0	0	0	0
MIR6723	450	655	667	413	215	1096	56	576	185	616	201	780	1437	1295	349	479	806	275	324	268	221	78	61	153	136	151	161	314	203	31	94	104	136	28	34	72	56	18	66	23	73
OR4F16	0	0	0	0	0	0	0	0	1	0	0	0	0	0	0	0	0	0	1	0	0	0	0	0	0	0	0	0	0	0	0	0	0	0	0	0	0	0	0	0	0
LOC100133331	89	36	3	59	77	240	14	174	46	264	32	90	121	70	36	192	12	87	76	67	74	139	38	193	28	30	11	70	66	103	96	55	28	20	50	159	44	65	124	83	16
LOC100288069	349	144	110	275	179	542	478	290	51	276	413	284	54	279	73	326	377	105	123	98	250	134	119	278	90	322	381	81	89	155	230	17	43	8	46	3	67	70	25	262	25
FAM87B	69	60	0	55	2	111	3	58	0	206	54	163	0	0	0	108	0	44	30	77	19	73	18	70	14	96	0	15	20	92	14	49	7	21	30	5	5	29	4	115	15
LINC00115	346	683	712	721	126	829	211	818	128	742	280	488	0	1195	300	940	12	57	40	112	49	107	48	123	33	137	16	70	30	129	132	52	11	44	48	48	33	47	7	161	2
FAM41C	0	0	0	19	0	0	0	0	32	15	4	0	0	0	0	2	0	0	0	7	0	0	0	0	0	0	0	0	0	0	0	0	2	7	0	0	0	0	0	0	0
LOC100130417	0	0	0	0	0	0	0	0	0	0	0	0	0	0	0	0	0	0	2	0	0	0	0	0	17	0	0	0	0	0	2	0	8	0	0	0	2	0	0	0	0
SAMD11	35	0	0	6	0	16	0	23	0	24	0	0	0	0	0	0	174	6	0	2	0	0	0	0	0	0	0	0	0	0	0	0	0	12	12	14	4	0	1	0	0
NOC2L	10393	8335	10355	4837	4647	6743	11519	9469	11272	7879	16139	8418	3952	6361	11855	8421	5988	262	562	252	382	465	183	534	268	139	269	147	520	325	880	108	250	404	1043	13198	420	967	2938	165	15
KLHL17	2032	1048	366	447	367	654	438	920	984	1127	3535	886	1488	808	959	2267	1689	34	269	20	36	18	22	87	25	8	46	54	24	59	306	56	118	86	45	1460	32	67	247	12	6
PLEKHN1	110	0	0	34	0	0	0	167	69	36	0	20	0	0	355	17	0	0	8	1	2	0	0	0	0	0	0	20	0	0	0	0	0	30	0	0	0	0	18	0	0
PERM1	6	0	0	0	0	0	0	5	25	16	0	0	0	0	37	0	0	0	12	0	4	0	0	0	0	0	10	8	0	0	0	0	2	32	0	0	0	8	8	0	0
HES4	7671	0	0	306	222	619	296	447	2985	1239	322	188	414	506	565	56	1180	0	6	0	0	0	0	4	0	2	0	0	0	2	0	0	24	0	0	6	8	14	205	0	0
ISG15	10667	35786	18241	7936	5421	4030	2150	9249	38048	8211	37689	5428	13852	3597	8352	13348	7560	633	2335	1637	1406	470	616	1106	248	390	991	1341	2024	2491	1381	2371	5173	684	1484	2084	1441	1316	1064	470	40
AGRN	150	58	184	94	200	116	128	62	192	117	162	19	0	4	77	96	223	4	22	16	23	6	6	6	25	2	0	10	0	36	5	6	24	32	154	19735	80	108	3275	5	2
RNF223	0	0	0	0	0	0	0	0	0	0	0	0	0	0	0	0	0	0	0	0	0	0	0	0	0	0	0	0	0	0	0	0	0	0	0	0	0	0	9	0	0
LINC01342	0	14	0	4	0	24	0	4	0	4	0	0	0	0	0	0	0	0	0	0	0	2	0	0	9	0	0	0	0	4	0	0	0	0	0	0	0	0	0	2	0
MIR200B	0	0	0	0	0	0	0	0	0	0	0	0	0	0	0	0	0	0	0	0	0	0	0	0	0	0	0	0	0	0	0	0	0	1	0	0	0	0	0	0	0
MIR200A	0	0	0	0	0	0	0	0	0	0	0	0	0	0	0	0	0	0	0	0	0	0	0	0	0	0	0	0	0	0	0	0	0	0	0	0	0	0	0	0	0
MIR429	0	0	0	0	0	12	0	0	0	0	0	0	0	0	0	0	0	0	0	0	0	0	0	0	0	0	0	0	0	0	0	0	0	0	0	0	0	0	0	0	0
TTLL10	0	0	0	0	28	0	0	0	0	0	0	0	0	0	0	0	0	0	0	0	0	0	0	1	0	1	0	0	0	0	0	0	0	0	0	1	0	3	0	0	0
TNFRSF18	11934	541	206	288	82	620	484	722	392	499	2956	265	0	0	0	1332	2	0	43	8	16	0	2	0	12	0	0	8	0	0	0	2	10	0	8	452	0	0	0	2	0
TNFRSF4	28994	57	82	270	140	391	534	160	284	334	4139	0	534	401	3	675	298	2	93	0	4	0	0	0	65	0	0	0	76	0	23	0	6	0	82	1134	2	0	0	2	0
SDF4	16662	11138	8354	6625	6271	9703	11774	10717	16105	12814	13600	12197	10508	6428	15171	14287	7265	192	226	84	127	86	153	288	152	300	332	171	448	182	406	34	292	446	421	7619	230	435	2936	45	70
B3GALT6	4356	1952	2026	1192	740	874	1046	2196	1572	1390	2914	2100	1756	904	2890	1392	3138	56	142	82	52	42	104	38	44	80	20	94	210	60	234	94	76	180	62	400	85	154	589	38	30
UBE2J2	6016	5986	4456	5013	4181	3033	3122	5186	5814	4486	7473	5848	5101	4252	4833	6008	4982	113	191	75	74	129	48	266	120	130	167	168	60	115	203	150	80	161	344	6093	113	172	1532	32	40
SCNN1D	196	109	0	14	28	684	178	100	105	312	248	194	0	684	0	137	0	22	8	8	0	20	2	41	22	14	53	64	0	12	44	3	10	46	0	74	12	13	129	0	0
ACAP3	1399	2072	1039	1076	294	2069	209	2090	486	3586	1070	3250	1125	4024	1747	3076	298	28	17	12	10	28	10	82	32	34	0	172	2	54	64	26	51	18	30	3243	28	22	711	4	0
MIR6726	0	0	0	0	0	0	0	0	0	0	0	0	0	0	0	0	0	0	0	0	0	0	0	0	0	0	0	0	0	0	0	0	0	0	0	0	0	0	0	0	0
PUSL1	1088	967	1510	1371	895	1219	898	1515	1466	1129	832	1037	1631	2022	782	1136	19	36	48	10	15	23	2	70	43	2	70	87	10	32	136	47	65	95	68	630	84	152	299	11	0
INTS11	12097	7849	8900	3985	3038	7783	7861	13778	13042	10603	12003	14806	7814	12278	8751	15366	5594	648	974	777	1181	624	641	1153	709	405	715	1549	1589	866	1411	325	787	837	1396	7790	537	1355	2358	435	154
MIR6727	0	0	0	0	0	0	0	0	0	0	0	0	0	1	0	0	0	0	0	0	0	0	0	0	0	0	0	1	0	0	0	0	0	0	0	3	0	0	2	0	0
CPTP	2840	1788	358	424	846	1460	1371	2447	2511	1361	1496	1464	2	1020	1622	1779	980	8	28	14	6	16	20	40	12	55	14	18	34	64	60	14	76	28	48	1649	36	50	562	4	2
TAS1R3	0	149	0	346	0	0	0	456	162	130	20	25	0	1405	0	213	0	10	0	0	0	0	2	12	2	0	0	0	2	2	2	2	2	0	0	37	0	0	21	0	0
DVL1	355	210	371	314	592	318	580	411	454	589	704	624	1916	2073	1807	240	1226	10	31	12	21	24	9	53	40	21	63	37	22	50	92	20	50	79	66	2838	73	44	912	14	2
MIR6808	0	0	0	0	0	0	0	0	0	0	0	0	0	0	0	0	0	0	0	0	0	0	0	0	0	0	0	0	0	0	0	0	0	0	0	3	0	0	2	0	0
MXRA8	0	0	0	52	0	116	3	0	0	78	862	8	152	0	5	55	474	0	10	0	4	2	9	6	0	0	8	40	0	9	0	2	1	26	0	15	7	6	75	8	0
CCNL2	7934	9508	3451	10897	6703	9823	6919	19884	5953	15880	9439	10720	4900	18988	14934	21176	12400	3441	2591	1807	1307	3221	721	5665	1410	2439	2006	7249	6798	2159	3686	2921	1058	1351	1822	7410	605	1299	2746	1993	435
LOC148413	1953	3496	2783	1195	1007	1033	1139	2524	2357	1734	1176	3194	1832	1530	852	4377	2454	235	199	242	184	209	186	280	159	127	145	135	362	193	326	56	108	342	218	938	182	229	342	175	55
MRPL20	7365	5909	13484	4758	9452	2959	9567	5834	7762	2503	14658	6202	8092	3285	6004	3802	11342	2307	5571	2204	4225	1969	4242	2218	2629	1447	7479	3304	8486	3215	4210	2766	4720	4453	14222	8072	5153	9416	2960	1942	668
ANKRD65	608	0	0	27	416	0	0	76	90	74	41	44	1	0	323	108	0	2	2	2	12	0	0	0	5	0	82	0	49	12	311	0	2	31	15	137	0	0	0	0	56
TMEM88B	0	0	0	0	9	0	0	0	0	0	0	0	0	0	0	0	0	0	0	0	0	0	0	0	0	0	0	0	0	0	6	0	0	0	0	25	0	0	0	0	0
LINC01770	175	0	0	0	118	0	0	0	64	0	0	0	0	0	0	0	57	2	0	0	0	0	0	0	0	0	26	0	0	2	79	0	0	0	19	19	0	0	0	0	0
VWA1	432	0	0	0	443	0	36	120	688	0	0	0	0	0	177	2	182	0	4	0	0	0	0	0	4	0	80	0	6	0	26	0	10	36	0	13	0	0	0	0	0
ATAD3C	270	27	70	42	53	74	77	132	127	30	84	23	56	55	100	96	67	21	5	9	0	32	0	33	1	11	2	25	381	31	125	0	0	5	2	16	5	0	0	5	0
ATAD3B	4825	2625	8554	1110	3310	2962	5958	4503	5094	5024	9434	2964	8043	6300	7321	4874	9188	91	79	29	36	25	57	164	80	54	33	197	51	63	339	10	89	90	280	8366	103	380	1283	16	69
ATAD3A	4284	1828	5929	821	3332	1509	5200	2576	4572	3113	7522	1714	8247	972	6006	3027	7700	18	64	10	38	6	24	33	41	9	15	0	0	47	222	4	65	44	103	4224	54	128	1575	2	13
TMEM240	0	0	0	0	0	2	0	0	0	0	0	0	0	0	0	0	0	0	0	0	0	0	0	0	0	0	0	0	0	0	0	0	0	1	2	31	0	0	0	0	0
SSU72	16795	13428	15586	17865	17486	11133	13298	20260	14483	18026	15590	20699	13166	12966	11632	17390	11227	1971	4672	1995	4987	2257	2618	2939	1604	2415	4559	3307	5326	2520	4908	2105	2173	3348	3872	9591	2971	3831	2751	1602	428
FNDC10	548	22	0	22	26	12	0	16	58	0	0	80	0	0	0	0	0	2	12	6	6	0	0	4	0	0	16	0	0	2	10	12	4	0	0	0	0	0	0	2	2
MIB2	5367	3650	1650	1958	1300	3955	904	5906	1253	6699	3344	3877	3522	4815	2396	7376	213	19	4	11	14	15	2	39	15	46	26	19	6	57	23	15	12	32	19	1683	8	2	218	12	0
MMP23B	14	1	8	1	0	2	2	22	5	0	18	0	0	32	90	4	154	0	0	0	0	0	0	0	0	0	0	0	0	0	2	0	0	0	0	7	0	0	1	0	0
SLC35E2B	734	3514	190	2289	729	2676	663	3878	1247	2934	953	2289	120	3033	1741	4916	188	1258	591	899	298	684	235	1148	377	734	291	1489	710	892	986	1004	481	536	595	1795	287	408	1255	797	201
MMP23A	9	1	9	4	5	2	2	38	14	0	28	2	0	51	55	15	83	0	0	0	0	5	2	5	1	0	0	0	0	0	5	0	0	2	0	0	0	0	0	0	0
CDK11A	1715	3277	1215	4360	1356	5235	1186	4180	1540	4922	2533	3631	2565	6199	2005	4723	2396	1361	678	1685	595	334	261	1572	419	740	530	2944	1527	703	652	459	370	182	449	1951	88	64	291	626	84
SLC35E2	192	1164	754	523	133	939	105	1198	184	1779	202	1696	6	1787	384	1498	305	1246	569	968	275	1002	305	1504	389	730	190	627	450	613	505	261	251	743	173	360	295	84	110	1042	146
GNB1	17906	11206	7548	14188	8721	9678	5117	14275	11601	12913	17239	11473	5196	6330	12144	13275	6064	4696	4562	4095	3421	4041	2597	2978	1774	4037	4107	5373	8637	2550	3159	2909	2089	4840	3712	24146	2532	5145	18191	4500	1255
CALML6	2	0	0	0	0	26	0	6	0	0	0	0	0	0	0	8	0	0	0	0	0	0	0	0	0	0	0	0	0	0	0	0	0	1	4	1	0	0	7	5	0
TMEM52	0	0	0	68	0	0	0	126	0	0	0	0	0	0	132	0	0	0	0	0	0	0	2	0	0	0	0	0	0	0	0	0	0	2	0	14	4	0	4	0	0
CFAP74	0	0	0	0	0	0	0	0	0	0	0	0	0	0	0	0	0	0	0	0	0	0	0	0	0	0	0	1	0	0	0	0	21	0	0	1	6	0	0	0	0
GABRD	0	0	0	0	0	0	0	0	0	0	0	0	0	0	0	0	0	0	0	0	0	0	0	0	0	0	0	0	0	0	0	0	0	0	0	0	0	0	0	0	0
LOC105378591	0	0	0	0	0	35	0	0	12	0	0	0	0	0	0	0	0	0	0	2	0	0	0	0	0	0	0	0	0	12	0	0	0	0	0	0	0	0	0	0	0
FAAP20	6346	5804	8245	4543	4992	4314	4131	6254	3446	5373	6286	6515	8890	4997	6373	6297	4833	140	115	79	73	78	50	224	103	130	20	200	32	133	241	38	87	235	133	3481	28	323	1334	80	12
MORN1	263	360	449	177	70	313	94	801	297	563	127	456	0	246	117	644	10	58	8	15	16	35	21	97	16	16	2	99	10	111	45	6	8	33	58	167	56	33	64	20	0
LOC100129534	8	38	6	170	28	236	8	42	50	187	16	20	2	10	218	82	0	10	10	6	18	19	2	20	33	24	2	34	6	34	12	22	3	2	14	210	12	10	10	26	0
RER1	16237	9141	16093	7886	11931	4963	11414	8923	13633	8651	18506	9064	11043	5707	15139	8629	8204	737	2021	898	2487	1559	986	2058	1571	1132	1104	1774	3739	2033	2298	704	1132	2042	4292	9972	1350	3326	3257	735	108
PEX10	2112	1244	473	696	631	719	1499	2408	880	1670	1254	1323	934	318	683	1353	1093	5	6	15	13	18	5	21	10	2	0	34	1	19	27	0	6	28	40	643	67	49	675	1	0
PLCH2	65	1594	0	1293	6	1149	0	3558	165	1660	0	1546	0	2726	0	4637	324	17	4	22	0	16	0	45	2	93	0	148	4	10	0	2	0	0	0	1	2	0	22	30	0
PANK4	1620	4274	1036	2375	1282	2032	1224	2134	1323	3367	1882	5563	4496	3946	3378	5476	412	368	279	465	272	275	147	387	189	231	2	681	282	433	552	305	171	330	400	1263	320	283	467	120	18
HES5	0	0	0	16	40	0	0	0	0	0	8	0	0	32	42	9	0	0	0	0	0	0	0	0	4	24	2	0	0	0	15	10	2	0	0	0	36	0	0	0	0
LOC115110	1235	1185	259	956	466	1353	1905	1388	617	1138	349	1202	499	3681	343	2202	1240	144	233	87	75	96	22	182	233	185	14	369	264	210	398	101	103	246	86	171	140	534	1862	124	36
LOC100996583	381	79	169	315	267	344	131	93	181	52	308	33	2	247	506	327	94	93	348	51	172	32	30	184	133	142	72	0	978	54	221	40	95	438	410	159	215	61	37	83	31
FAM213B	3903	1261	50	706	1946	678	2340	972	2891	992	413	1987	935	802	1901	2490	62	28	85	43	42	70	15	163	58	16	0	148	38	119	322	30	18	94	175	2973	123	121	725	45	4
MMEL1	26	0	0	0	0	0	0	0	0	0	0	0	0	0	0	0	0	0	2	0	0	0	0	4	2	0	0	0	0	0	4	0	0	0	0	0	0	1	0	0	0
ACTRT2	0	0	0	0	0	0	0	0	0	0	0	0	0	0	0	0	0	0	0	0	0	0	0	0	0	0	0	0	0	0	12	0	0	0	0	0	0	0	0	0	0
LINC00982	0	0	0	0	262	0	389	0	14	0	1077	0	0	0	1424	18	290	0	91	0	153	0	11	0	135	0	12	0	0	0	200	0	0	8	10	6	0	0	2	0	0
MIR4251	0	0	0	0	0	0	0	0	0	0	0	0	0	0	0	0	0	0	0	0	0	0	0	0	0	0	0	0	0	0	0	0	0	0	0	0	0	0	0	0	0
ARHGEF16	0	0	0	0	0	0	0	0	0	0	0	0	0	0	0	0	0	0	20	0	0	0	0	0	0	0	0	0	0	0	0	0	0	0	0	9	0	0	2	0	0
MIR551A	0	0	0	0	0	0	0	0	0	0	0	0	0	0	0	0	0	0	0	0	0	0	0	0	0	0	0	0	0	0	0	0	0	0	46	1	0	0	0	0	0
TPRG1L	360	1448	306	770	630	1023	1009	1404	198	1800	510	1249	450	490	54	2018	268	440	340	291	208	456	52	546	280	284	174	598	1214	390	308	712	390	632	430	2603	481	954	1862	412	318
WRAP73	3174	4878	4599	2012	2856	2360	2975	3329	2052	3903	4154	2818	8301	1134	2559	4456	3758	230	677	198	328	223	186	416	334	304	168	551	340	500	845	407	557	852	1642	4414	733	543	808	120	55
TP73	216	0	826	69	138	6	2522	125	407	30	0	6	0	0	18	0	837	15	79	2	2	9	0	69	83	2	0	17	74	2	95	2	205	2	5	18	266	78	313	4	39
TP73-AS1	1510	1604	217	728	288	767	364	2059	0	3328	674	2757	1509	1234	4	1702	1922	503	49	338	4	310	0	404	8	268	0	273	27	154	0	291	0	0	0	0	0	0	0	533	178
SMIM1	82	32	0	14	11	37	0	66	22	64	0	64	0	86	0	26	0	0	6	4	0	6	0	19	6	16	0	0	0	38	10	6	2	46	0	6	0	0	0	8	0
LRRC47	4636	6257	3647	3003	2772	3624	3416	5253	4260	4540	2880	6002	6578	1765	2262	7215	2968	748	1091	421	559	585	280	757	351	465	340	553	1221	625	1362	623	450	600	1222	7674	1571	776	1834	337	147
CEP104	1480	2449	516	2453	1293	1851	1153	2820	1234	1848	1170	1910	1505	2119	1808	4307	515	743	889	809	414	518	317	977	357	928	578	2328	1108	540	1105	676	459	818	986	1906	830	597	1352	666	169
C1orf174	1888	2135	2374	804	1522	1110	2432	2177	1938	1608	1314	1567	424	1036	969	3374	3771	1615	2310	1338	1421	1294	1242	1977	1199	1421	784	3053	4225	938	2565	1565	2094	3052	4346	2927	1631	2520	880	526	331
LINC01134	20	32	115	9	8	0	23	34	8	11	0	0	0	12	0	0	0	0	0	0	8	9	16	5	4	9	0	0	0	31	33	0	19	64	7	4	95	27	10	2	0
LINC01346	0	0	0	0	0	0	0	0	0	0	0	0	0	0	0	0	0	0	0	0	0	0	0	0	0	0	0	0	0	0	0	0	0	0	0	0	0	0	0	0	0
LINC01777	0	0	0	0	0	0	0	0	0	0	0	0	0	0	0	0	0	0	0	0	0	0	0	0	0	0	0	0	0	0	3	0	0	0	0	0	5	0	0	0	0
MIR4417	0	0	0	0	0	0	0	0	0	0	0	0	0	0	0	0	0	0	0	0	0	0	0	0	0	0	0	0	0	0	0	0	0	0	0	0	0	0	0	0	0
MIR4689	0	0	0	0	0	0	0	0	0	0	0	0	0	0	0	0	0	0	0	0	0	0	0	0	0	0	0	0	0	0	0	0	0	0	0	0	0	0	0	0	0
CHD5	0	2	0	0	0	0	0	6	0	0	14	4	0	0	0	0	0	0	12	0	1	0	2	7	10	1	0	0	0	0	18	0	0	2	0	6	0	5	28	0	0
RPL22	4262	4737	6870	6950	7968	5110	5787	6538	4319	6924	7178	7440	4421	3076	1708	4972	4976	6988	7087	9038	12051	7026	5768	8328	5817	9997	11351	5370	6850	14687	9913	6667	4562	7407	9964	27142	6189	9487	14599	6032	2792
LOC102724450	123	0	105	0	27	0	67	0	146	0	0	5	67	0	0	0	0	0	3	0	0	0	8	0	6	0	0	0	0	0	4	0	1	5	4	7	8	3	5	0	4
RNF207	1416	0	1118	147	688	0	741	58	1174	0	1827	0	871	76	1616	12	109	7	640	2	90	0	467	39	268	2	101	2	938	2	282	2	692	580	444	684	577	851	792	0	68
LINC00337	113	2	0	35	178	0	102	0	434	0	287	0	0	0	0	22	950	2	380	2	94	2	170	2	39	0	1	10	167	10	176	2	161	55	28	20	475	149	194	3	2
HES3	0	0	0	0	14	0	8	0	16	0	0	0	0	0	0	0	0	0	0	0	0	0	0	0	0	0	0	0	0	0	0	0	2	0	0	0	0	0	0	0	0
GPR153	2871	0	150	0	159	0	1358	0	584	4	818	0	106	0	274	0	120	0	870	0	162	2	0	0	452	2	50	0	257	4	1134	4	2	70	10	266	28	0	98	0	186
HES2	0	0	0	0	0	0	0	0	0	0	0	0	0	0	0	0	0	2	150	0	0	0	0	0	0	0	2	0	38	0	0	0	0	0	0	2	0	0	0	0	0
ESPN	240	0	0	0	0	2	0	0	0	0	0	0	0	0	0	0	0	0	4	0	0	0	0	0	2	0	2	0	0	0	4	0	0	8	3	12	0	0	0	0	4
MIR4252	8	0	0	0	0	0	0	0	0	0	0	0	0	0	0	0	0	0	0	0	0	0	0	0	0	0	0	0	0	0	0	0	0	0	0	0	0	0	0	0	0
TNFRSF25	9482	0	24	78	12	213	0	53	302	58	1948	125	0	276	2	267	421	0	70	0	14	22	0	3	211	10	0	0	30	4	14	0	16	264	18	357	26	0	4	0	46
NOL9	1611	2319	390	1326	665	1804	1156	1470	1710	797	634	2262	1282	1200	588	2051	418	2386	1856	901	929	1625	1060	1870	874	527	1074	1519	1957	674	1534	1150	938	1501	2379	3338	1040	2497	2092	663	583
TAS1R1	0	0	0	0	30	16	60	0	22	0	0	16	0	0	0	0	0	5	4	0	0	1	12	5	0	2	0	0	4	0	12	0	0	24	0	0	0	0	2	5	0
ZBTB48	2655	2762	901	1998	2207	3192	2476	3686	2217	4554	4151	4998	3434	3115	3150	7190	2605	290	324	206	217	394	228	455	200	214	303	678	330	280	422	112	251	368	199	1400	72	199	397	199	30
KLHL21	1050	1506	626	405	738	2088	1580	1942	3036	1810	525	1505	972	17	0	2263	1506	283	281	185	76	122	48	134	34	166	176	104	342	178	216	197	110	523	168	1702	563	212	335	252	60
PHF13	204	359	108	248	659	90	498	252	339	36	388	602	1164	8	4	288	480	85	218	105	237	87	81	158	111	122	44	88	182	65	348	172	156	533	232	1335	202	156	670	140	70
THAP3	3444	2179	1417	2356	2208	1441	2289	2018	2254	1849	3028	2257	1188	1355	1631	2338	948	284	672	479	737	520	321	671	322	273	476	607	1527	555	1039	1018	265	806	763	783	462	712	205	317	52
DNAJC11	1729	2424	2169	1370	1997	1689	2068	2143	2867	1487	1804	2430	2645	1851	1379	2259	919	604	854	470	722	510	612	550	642	282	604	1261	1177	388	1272	280	380	841	1539	3047	698	1207	1496	342	214
LINC01672	0	0	0	0	0	0	0	0	0	0	0	0	0	0	0	0	0	3	0	0	0	0	0	0	0	0	0	0	0	0	0	0	0	0	0	0	0	0	0	0	0
VAMP3	1329	2138	32	1578	895	1108	1199	2856	442	5191	1364	2707	172	1414	250	2361	1096	1845	1427	1051	831	1139	557	598	370	1208	309	1493	1269	918	925	1066	435	813	1102	2346	545	1639	1013	665	240
UTS2	0	0	0	0	0	0	20	201	532	0	0	0	972	0	0	543	286	335	625	0	0	0	0	0	5	162	1304	474	1532	3	5	0	0	13	0	0	0	0	0	0	0
PARK7	59943	16069	61026	14673	28211	11189	38234	20589	38563	15673	49913	20328	37937	12318	31395	15196	32890	5067	20431	4092	14978	5151	15193	5111	7386	5066	20553	9015	25315	5099	21986	9502	10642	15170	35294	19649	15599	22136	7181	5037	2313
ERRFI1	20	0	0	0	6	4	0	0	0	2	0	6	0	0	0	42	0	82	11	57	0	5	0	108	40	11	17	128	42	6	1	114	0	6	0	3	24	26	2	20	86
LINC01714	0	0	0	0	0	0	0	0	0	0	0	0	0	0	0	0	0	0	0	0	0	0	0	0	0	0	0	0	0	0	1	0	0	0	0	0	0	6	0	0	0
LOC102724552	25	168	0	116	0	447	0	233	0	100	118	225	0	306	0	569	0	81	35	30	4	77	5	102	2	154	8	95	0	45	29	33	4	6	5	4	14	5	0	68	0
SNORD128	0	8	0	45	0	0	0	0	0	0	0	8	0	0	0	3	0	18	7	16	0	9	0	10	0	36	0	8	32	11	6	6	6	0	3	1	0	0	0	23	0
ENO1	145759	86853	299530	67530	306787	44184	325293	95197	304780	74743	315381	83112	205085	35637	198593	67076	214899	25432	133934	21182	129772	16070	94365	20264	68886	11840	97694	20602	147847	12613	163829	21877	41266	126666	145995	146738	81999	139724	66225	17218	22423
MIR6728	0	0	0	2	0	0	13	0	0	0	0	0	0	0	38	0	0	9	5	0	6	0	2	2	2	3	1	0	13	0	7	0	7	1	1	3	3	8	0	1	0
ENO1-AS1	101	110	77	174	796	303	240	282	172	121	225	329	371	162	83	65	865	6	18	12	41	11	7	22	0	34	276	47	38	18	45	4	31	15	16	7	39	49	3	3	0
CA6	0	0	63	0	0	0	0	0	100	0	0	0	0	0	8	0	0	0	0	0	0	0	0	0	0	0	0	0	0	0	0	0	0	0	0	0	0	2	0	0	0
SLC2A7	2	0	0	0	0	0	0	0	0	0	0	0	0	0	0	0	0	0	0	0	0	0	2	2	0	0	0	0	0	0	0	0	0	0	0	0	0	0	0	0	0
SLC2A5	593	3776	1177	1528	210	1285	430	3077	3652	2234	1414	3407	1388	3029	324	4430	322	530	20	785	14	500	288	530	12	823	2	950	0	593	1422	449	270	1327	695	1412	2	340	711	683	260
MIR34AHG	91	0	318	0	170	0	17	0	193	0	270	208	177	0	116	16	0	31	465	91	131	10	558	3	59	0	276	1	1157	4	682	2	262	1197	309	567	28	143	28	21	100
MIR34A	0	0	0	0	0	0	0	0	0	0	0	0	0	0	0	0	0	0	0	0	0	0	0	0	0	0	0	0	0	0	0	0	0	0	0	0	0	0	0	0	0
LINC01759	4	0	135	0	189	0	81	0	158	2	144	169	0	27	125	0	0	5	76	53	19	0	47	2	40	0	115	2	10	0	72	0	80	49	2	52	0	8	4	6	0
SPSB1	1727	1904	210	1332	236	614	498	1550	998	1879	280	1641	0	85	0	900	236	30	147	90	18	104	8	128	10	62	4	116	170	60	125	123	90	202	0	0	6	16	60	54	8
LOC100506022	0	8	0	42	0	215	17	20	0	63	0	86	0	18	54	129	0	33	45	33	12	41	7	24	12	121	29	11	141	28	0	2	6	48	26	6	12	25	20	3	0
SLC25A33	3560	880	1514	1428	1901	1940	2254	1554	2411	5094	5600	1472	468	1387	3561	995	714	307	218	146	93	72	193	149	84	594	267	54	446	87	246	187	221	298	142	676	239	357	541	101	55
TMEM201	308	259	342	202	323	46	360	267	209	225	510	541	0	373	0	600	34	104	76	58	4	21	18	31	64	30	2	121	16	48	171	37	126	135	325	4355	128	306	925	30	0
PIK3CD	8031	21026	2	6581	947	7697	2615	12461	1359	11818	5126	14230	3872	9765	14606	22804	4259	4035	2213	3300	882	3620	310	3607	3435	2302	484	5159	6075	3198	1958	2479	1146	2362	1247	6979	1377	1443	7310	2674	942
PIK3CD-AS1	52	557	0	688	35	376	219	879	64	72	1280	440	2	323	0	637	7	110	15	59	14	96	6	237	180	98	123	157	222	119	106	46	83	106	55	70	82	34	47	92	38
PIK3CD-AS2	70	10	289	30	253	0	405	57	210	4	446	114	0	110	5	4	114	94	102	49	284	55	61	78	35	33	47	53	101	74	73	20	70	108	726	564	32	161	129	108	4
LZIC	2660	1997	555	1887	1209	1518	1252	2873	1787	2949	2619	1878	636	1411	865	1950	438	1655	1394	1617	870	1707	474	1165	1326	1684	660	1632	3298	1549	520	1425	802	2803	4442	4756	1002	1812	920	1288	16
NMNAT1	693	1083	606	1162	708	1042	663	1574	195	942	801	1610	2	506	414	1721	208	842	929	711	712	474	239	818	869	506	706	1364	1770	470	378	395	304	1055	1314	846	491	1137	302	471	17
MIR5697	0	0	0	0	14	0	0	0	0	0	0	0	0	0	0	4	0	0	3	0	5	2	5	8	4	0	0	26	0	0	0	0	0	4	0	2	0	0	1	0	0
RBP7	0	0	0	0	0	8	0	0	0	0	0	0	0	0	0	0	0	2	0	0	0	0	0	0	3	0	0	8	0	0	2	0	0	6	0	2	0	2	0	0	0
MIR1273D	13	0	0	0	0	0	0	0	0	0	0	0	0	0	0	0	0	0	4	0	2	1	3	1	2	0	9	0	0	4	4	0	3	2	0	0	0	0	0	0	0
PGD	10110	2265	4678	1560	8184	1699	5882	3041	9281	1935	6562	2454	2695	908	7462	3121	3470	1422	6615	1161	7753	750	5288	1491	13034	459	3465	957	7441	713	8918	681	2733	4746	8696	13492	8837	10977	8008	1022	437
CENPS	333	37	593	182	252	116	323	79	231	85	326	46	97	153	307	66	441	29	207	34	89	32	57	28	402	28	221	28	385	15	145	36	186	284	587	225	278	324	93	9	23
APITD1-CORT	0	0	0	0	0	0	0	0	0	0	0	0	0	0	0	0	0	0	0	0	0	0	0	0	0	0	0	0	0	0	0	0	0	0	0	0	0	0	0	0	0
CORT	0	0	0	11	17	66	0	0	0	0	0	0	0	0	0	0	0	10	38	0	7	2	9	22	29	0	0	26	0	0	56	0	8	11	9	38	20	1	11	2	0
DFFA	5838	4187	8331	3573	5341	3344	7710	5700	9686	5504	7795	4006	4288	2328	4152	4146	4587	1819	2613	1468	3626	1232	3151	1938	7484	1134	4968	2424	3638	1060	5520	1171	2590	2601	4614	1818	4360	4691	1609	1329	366
TARDBP	6191	7540	4637	9842	6997	3208	6328	6730	5819	7910	5018	9529	2278	8080	9705	8510	5834	11083	15485	5990	7943	5985	7305	6820	15311	3969	7355	7662	13158	3049	14784	4221	5450	8979	16558	10792	10971	18865	9983	4869	3197
MASP2	20	26	44	133	17	25	27	63	8	167	36	101	0	164	63	97	286	362	159	97	65	282	90	476	244	205	95	159	469	89	153	201	44	133	178	173	43	233	114	160	6
SRM	17202	9287	32959	7806	23536	6600	33055	12604	26558	10037	32833	9673	16861	5971	17405	8488	18987	193	493	103	490	117	630	281	1013	144	599	164	128	236	1271	314	725	466	1700	32437	1118	1412	4710	106	256
LOC105376736	73	0	78	0	60	4	8	21	19	0	118	0	0	0	8	0	0	22	7	2	13	0	12	11	15	0	70	0	0	1	5	0	3	0	3	3	24	22	17	6	0
MTOR-AS1	0	0	0	7	0	0	30	0	0	0	0	35	0	0	0	0	0	24	30	16	8	17	0	19	24	53	0	51	53	3	3	4	16	4	9	3	5	13	1	18	0
ANGPTL7	0	0	0	0	0	0	0	0	0	0	0	0	0	0	0	0	0	23	17	11	14	19	5	20	40	32	39	26	117	10	26	0	2	11	26	3	7	16	0	25	0
UBIAD1	1692	3782	526	3134	2452	3686	1297	3939	2198	5144	2122	3580	860	627	1510	5192	2102	1549	707	1335	1125	1467	664	1634	2881	684	524	1206	1471	967	959	974	1105	1103	1323	3054	735	1502	1169	932	206
DISP3	18	0	0	0	5	0	4	0	0	0	9	6	0	0	0	5	0	6	20	3	2	0	0	0	235	0	1	0	14	0	18	0	11	3	31	207	12	2	27	0	0
LINC01647	0	0	0	0	16	0	0	0	0	0	0	0	0	0	0	0	0	0	0	0	0	0	0	0	0	0	0	0	0	0	2	0	0	0	0	0	8	0	0	0	0
FBXO2	1617	1062	0	413	75	1064	0	1418	124	2079	0	1388	6	288	423	1468	9	10	0	45	0	9	0	80	7	70	0	0	0	62	20	6	28	6	6	12	70	0	0	55	0
FBXO44	2968	5000	12	2559	1697	3141	84	5744	874	7647	2786	5991	3147	5402	4903	7102	500	990	324	453	353	1000	4	1561	1682	489	152	1150	238	737	599	516	282	247	23	124	303	74	51	555	30
FBXO6	7674	6305	1496	4650	4479	3224	2	7274	5371	3974	10616	3650	2046	1704	2922	8968	1922	1341	1614	1481	1621	1353	30	2145	1486	749	1086	1879	4922	1456	1997	2840	2199	1325	466	308	911	648	165	1473	100
MAD2L2	12163	6268	9276	5376	14773	3671	6369	6527	9008	6930	17763	5535	9104	3196	8578	4621	7406	304	920	294	487	461	341	584	2589	452	1428	668	1613	538	2259	259	434	1963	1693	5105	1166	1598	1274	237	60
DRAXIN	27	0	0	49	0	224	0	164	0	47	0	61	0	0	0	0	0	18	3	0	0	4	0	10	8	0	0	0	0	0	10	31	0	0	0	0	0	0	0	0	0
C1orf167	0	2	0	19	0	0	2	0	0	0	0	84	0	0	0	53	0	4	0	0	0	0	0	23	10	9	0	0	0	1	0	0	0	2	0	0	0	0	0	0	0
LOC102724659	0	0	0	2	0	0	4	0	0	0	2	1	0	0	0	0	0	2	0	0	0	0	0	2	0	0	0	0	0	1	0	0	2	0	0	0	0	0	0	0	0
MTHFR	40	2305	112	3293	345	3407	312	1756	544	2846	114	3821	4	1850	0	2614	136	1703	603	1754	373	2044	107	1779	724	1750	191	2525	218	1091	943	894	165	449	203	476	278	247	997	1076	105
CLCN6	1187	1948	310	2709	101	2009	352	3564	340	3048	754	2843	238	2745	744	3447	485	1740	488	1550	431	1404	175	1564	1579	1047	456	2300	872	978	424	558	118	263	501	1214	249	327	989	1193	100
NPPA-AS1	28	53	66	6	38	0	0	176	0	88	0	5	0	213	0	117	0	79	14	27	17	71	7	15	22	33	0	3	124	38	4	10	8	1	0	16	1	21	75	30	0
NPPA	9	56	37	40	21	40	0	69	0	9	0	49	0	145	6	78	0	71	17	32	9	60	4	14	33	38	0	30	78	45	15	19	2	4	3	13	5	39	31	39	0
NPPB	0	0	0	0	0	0	10	4	0	0	0	0	0	0	0	0	0	0	0	0	0	0	0	0	3	0	0	0	0	0	0	0	0	0	0	0	0	0	0	0	0
RNU5E-1	770	299	76	923	532	2274	2526	1227	1564	1152	1433	637	0	322	312	1192	1133	90	68	31	153	48	37	765	530	1900	2715	168	71	293	659	33	146	2	4	1	2	10	1	44	0
KIAA2013	12068	13089	6366	4522	2889	5661	4091	13676	5784	11115	9049	12594	3374	6507	9009	14006	7894	376	540	352	266	257	270	574	1176	269	79	338	768	468	548	356	345	587	663	4349	298	579	1765	244	250
PLOD1	7331	612	688	1128	3481	1366	3073	1556	3956	1547	3856	927	2266	66	2714	848	3210	275	578	234	950	124	88	248	2872	211	510	12	1425	147	1189	96	552	3111	1781	4203	2636	3478	3729	179	364
MIIP	27616	6335	12225	4834	9905	5947	11829	8567	11627	11030	23876	7167	14206	15419	16628	9412	11168	135	588	105	274	109	228	441	2232	48	523	570	511	211	2746	45	673	2330	217	1953	156	1393	5065	53	32
MIR6729	0	0	0	0	0	0	0	0	0	0	0	0	0	0	0	0	0	0	0	0	0	0	0	0	0	0	0	0	0	0	0	0	0	0	0	1	0	0	3	0	0
MIR7846	0	0	0	0	0	1	0	2	0	0	0	0	0	0	0	0	0	0	0	0	0	0	0	0	0	0	0	0	0	0	0	0	0	0	0	0	0	0	0	0	0
TNFRSF1B	14349	7131	28	2976	6	5933	214	5217	377	6880	615	5915	118	1958	0	11153	16	722	355	446	94	514	19	937	238	430	10	958	229	817	119	501	108	259	0	2	6	11	6	1041	8
MIR4632	15	0	0	0	0	0	0	0	0	0	0	0	0	0	0	0	0	0	0	0	0	0	0	0	0	0	0	0	0	0	0	0	0	0	0	0	0	0	0	0	0
SNORA59A	9	8	0	3	8	18	2	1	2	8	2	7	0	0	0	11	5	10	7	7	3	14	0	5	19	1	0	13	0	7	13	4	10	0	10	9	11	6	3	18	0
DHRS3	165	0	0	0	0	0	0	0	0	0	30	0	0	0	0	0	0	5	22	10	66	0	0	0	89	0	100	11	0	0	17	0	8	0	0	0	186	78	21	4	136
MIR6730	0	0	0	0	0	0	0	0	0	0	0	0	0	0	0	0	0	0	0	0	0	0	0	0	0	0	0	0	0	0	0	0	0	0	0	0	0	0	0	0	0
AADACL3	0	0	0	0	0	0	0	0	0	0	0	0	0	0	0	0	0	0	0	0	0	0	0	0	0	0	0	0	0	0	0	0	0	0	0	0	0	0	0	0	0
C1orf158	0	0	0	0	0	0	0	0	0	0	0	0	0	0	0	0	0	0	0	0	0	0	0	0	10	0	0	0	0	0	0	0	0	0	0	0	2	10	6	0	0
PRAMEF12	0	0	0	0	0	0	0	0	0	0	0	0	0	0	0	0	0	0	0	0	0	0	0	0	0	0	0	0	0	0	0	0	0	0	0	2	0	29	2	0	0
PRAMEF1	0	0	0	0	0	0	0	0	0	0	0	0	0	0	0	0	0	0	0	0	0	0	0	0	0	0	0	0	0	0	0	0	0	27	0	0	0	30	4	0	0
PRAMEF11	0	0	0	0	0	0	0	0	0	0	0	0	0	0	0	0	0	0	0	0	0	0	0	0	0	0	0	0	0	0	0	0	0	0	0	0	0	2	0	0	0
HNRNPCL1	122	140	178	121	104	58	113	102	148	76	189	134	129	45	127	95	56	9	11	12	10	3	3	7	7	5	19	23	74	3	15	2	4	19	7	54	12	8	20	9	4
PRAMEF2	0	0	0	0	0	0	0	0	0	0	0	0	0	0	0	0	0	0	0	0	0	0	0	0	0	0	0	0	0	0	0	0	0	7	0	0	0	45	2	0	0
PRAMEF4	0	0	0	0	0	0	0	0	0	0	0	0	0	0	0	0	0	0	0	0	0	0	0	0	0	0	0	0	0	0	0	0	0	0	0	0	0	44	6	0	0
PRAMEF10	0	0	0	0	0	0	0	0	0	0	0	0	0	0	0	0	0	0	0	0	0	0	0	0	0	0	0	0	0	0	0	0	0	0	0	0	0	0	0	0	0
PRAMEF7	0	0	0	0	0	0	0	0	0	0	0	0	0	0	0	0	0	0	0	0	0	0	0	0	0	0	0	0	0	0	0	0	0	0	0	0	0	2	4	0	0
PRAMEF6	0	0	0	0	0	0	0	0	0	0	0	0	0	0	0	0	0	0	0	0	0	0	0	0	0	0	0	0	0	0	0	0	0	0	0	0	0	4	0	0	0
PRAMEF18	0	0	0	0	0	0	0	0	0	0	0	0	0	0	0	0	0	0	0	0	0	0	0	0	0	0	0	0	0	0	0	0	2	0	0	0	0	0	0	0	0
PRAMEF34P	0	0	0	0	0	0	0	0	0	0	0	0	0	0	0	0	0	0	0	0	0	0	0	0	0	0	0	0	0	0	0	0	0	2	0	0	0	2	0	0	0
HNRNPCL2	2	4	4	5	4	2	3	0	4	2	7	2	5	1	3	1	0	3	3	2	8	3	3	3	5	1	5	2	13	1	5	0	2	6	5	2	2	5	0	5	0
PRAMEF36P	0	0	0	0	0	0	0	0	0	0	0	0	0	0	0	0	0	0	0	0	0	2	0	0	0	0	0	0	0	0	0	0	0	3	0	0	0	20	16	0	0
PRAMEF25	0	0	0	0	0	0	0	0	0	0	0	0	0	0	0	0	0	0	0	0	0	0	0	0	0	0	0	0	0	0	0	0	0	0	0	0	2	5	0	0	0
PRAMEF5	0	0	0	0	0	0	0	0	0	0	0	0	0	0	0	0	0	0	0	0	0	0	0	0	0	0	0	0	0	0	0	0	0	0	0	0	0	2	0	0	0
PRAMEF33P	0	0	0	0	0	0	0	0	0	0	0	0	0	0	0	0	0	0	0	0	0	0	0	0	0	0	0	0	0	0	0	0	0	0	0	0	0	0	0	0	0
PRAMEF13	0	0	0	0	0	0	0	0	0	0	0	0	0	0	0	0	0	0	0	0	0	0	0	0	0	0	0	0	0	0	0	0	0	1	0	0	0	0	0	0	0
PRAMEF8	0	0	0	0	0	0	0	0	0	0	0	0	0	0	0	0	0	0	0	0	0	0	0	0	0	0	0	0	0	0	0	0	0	0	0	0	0	0	0	0	0
PRAMEF15	0	0	0	0	0	0	0	0	0	0	0	0	0	0	0	0	0	0	0	0	0	0	0	0	0	0	0	0	0	0	0	0	0	0	0	0	0	0	0	0	0
PRAMEF14	0	0	0	0	0	0	0	0	0	0	0	0	0	0	0	0	0	0	0	0	0	0	0	0	0	0	0	0	0	0	0	0	0	0	0	0	0	0	0	0	0
PRAMEF19	0	0	0	0	0	0	0	0	0	0	0	0	0	0	0	0	0	0	0	0	0	0	0	0	0	0	0	0	0	0	0	0	0	0	0	0	0	0	0	0	0
PRAMEF17	0	0	0	0	0	0	0	0	0	0	0	0	0	0	0	0	0	0	0	0	0	0	0	0	0	0	0	0	0	0	0	0	0	0	0	0	0	0	0	0	0
PRAMEF20	0	0	0	0	0	0	0	0	0	0	0	0	0	0	0	0	0	0	0	0	0	0	0	0	0	0	0	0	0	0	0	0	0	0	0	0	0	0	0	0	0
LRRC38	0	0	0	0	0	0	0	0	0	0	0	0	0	0	0	0	0	6	2	0	0	0	0	0	8	0	0	0	0	0	0	0	0	0	0	0	0	0	0	0	0
PDPN	829	0	0	48	0	0	2	0	0	0	0	0	0	0	0	0	0	0	1288	0	28	0	0	0	25	0	0	0	0	2	25	0	0	0	0	24	0	0	0	0	0
PRDM2	2782	3844	1890	7747	2911	7706	1485	6123	1265	12705	1971	4478	1273	10261	1428	7071	2401	12781	4883	8582	2424	5221	1986	7231	11015	11784	1952	12378	7542	4634	4068	6594	1471	2508	1844	2486	1697	1940	2004	8315	2724
TMEM51	856	0	0	12	90	0	70	0	0	1	0	0	0	0	0	0	274	0	2	0	18	0	0	0	42	0	0	12	18	0	100	0	0	0	3	4	0	0	0	2	0
C1orf195	2	0	0	0	0	0	0	0	0	0	0	0	0	0	0	0	0	5	2	0	0	0	0	0	7	0	0	0	0	0	25	0	0	0	5	4	0	0	0	0	0
EFHD2	27383	7872	5324	4325	8350	13189	13695	13719	20848	20421	16639	11621	9315	9197	8212	11224	4670	345	586	204	264	246	196	697	1775	521	460	332	954	542	973	447	868	536	818	8960	197	598	2540	347	180
CTRC	0	0	0	0	0	0	23	77	0	110	0	0	0	0	0	0	0	15	12	1	0	12	2	34	24	87	0	0	2	0	0	3	0	0	0	2	0	2	0	0	0
CELA2A	0	0	0	0	0	0	0	0	0	3	0	0	0	0	0	0	0	6	3	2	3	1	4	5	6	0	0	0	0	6	11	0	0	0	0	2	0	0	0	1	0
CELA2B	0	5	0	0	0	38	0	22	0	19	0	38	0	84	0	17	0	30	6	16	10	8	5	24	23	42	0	0	0	15	1	12	5	5	10	5	4	7	1	6	0
CASP9	2306	2046	1357	1364	1384	1201	654	1128	1191	2181	790	1651	4	1273	1038	1655	0	635	399	554	527	688	284	445	1312	266	92	704	1203	394	637	882	187	191	322	508	198	440	469	459	204
AGMAT	1240	913	853	555	659	1302	566	1511	263	1296	594	1355	0	523	207	1023	522	113	157	161	45	197	4	106	101	137	6	246	218	138	156	75	19	155	4	15	4	25	1	78	12
DDI2	489	788	252	160	400	632	119	560	269	191	289	807	0	140	172	404	610	327	70	110	55	117	61	120	132	128	127	162	112	163	96	46	47	55	63	88	64	62	306	150	5
RSC1A1	236	596	165	154	365	38	64	180	158	189	267	205	0	12	111	272	148	270	161	129	233	183	138	194	478	209	215	455	335	129	303	193	96	160	213	377	101	209	449	84	83
PLEKHM2	4215	2980	916	2697	1601	4202	829	3636	1584	6482	5131	5081	642	6278	2617	4777	3295	294	127	208	134	218	111	438	703	343	30	493	382	396	709	97	130	156	146	6294	116	96	1504	243	41
SLC25A34	42	30	18	86	7	116	4	10	0	201	6	157	2	334	140	8	0	40	22	28	48	30	16	32	140	9	0	6	5	10	36	44	6	12	0	42	14	14	13	0	0
TMEM82	0	0	0	0	0	0	0	0	0	0	0	0	0	0	0	0	0	0	0	0	0	0	0	3	9	6	0	0	0	0	0	0	0	0	0	0	0	0	0	0	0
FBLIM1	434	9	0	7	0	15	0	10	0	7	0	9	0	11	2	40	212	9	15	6	0	12	0	21	0	0	2	2	0	2	0	0	0	0	8	71	0	0	0	4	1
UQCRHL	2868	1996	7632	2032	6064	1450	4502	2212	2874	1710	3866	2490	3316	1328	3738	2071	2410	873	1254	1093	1274	802	1007	1041	866	1120	2158	1806	2547	786	949	823	1886	2035	6818	3613	2916	3540	318	866	188
FLJ37453	1283	2226	1255	2514	764	3329	1378	3376	441	2006	1535	2366	1955	2629	1917	3040	1027	408	212	479	216	316	154	580	628	916	649	839	731	695	645	214	116	269	177	212	111	177	132	357	8
ZBTB17	6186	5507	793	2605	1070	6024	2022	8710	2021	7058	2592	5067	2654	6146	1984	8524	656	259	170	184	185	173	39	470	931	335	75	503	201	283	287	111	133	268	192	2200	61	98	532	125	32
C1orf64	0	0	0	0	0	0	0	0	0	0	0	0	0	0	0	0	0	0	0	0	0	0	0	0	0	0	0	0	2	0	0	0	0	0	0	0	0	0	0	0	0
HSPB7	0	0	0	0	0	0	0	0	0	0	0	0	0	0	0	0	0	0	0	4	0	0	0	0	0	0	0	0	0	0	0	0	0	0	0	0	0	4	0	0	0
CLCNKA	0	0	0	0	0	0	0	0	0	0	0	0	0	0	0	0	0	0	5	0	0	0	0	0	0	0	0	2	0	0	0	0	0	0	0	0	0	0	2	0	0
CLCNKB	0	0	0	0	0	0	0	0	0	0	0	0	0	0	0	0	0	0	0	0	0	0	0	0	0	0	0	0	0	0	0	0	0	0	0	0	0	0	0	0	0
FAM131C	0	0	0	0	0	0	0	0	0	0	6	0	0	0	0	0	0	0	0	1	0	0	0	0	0	0	0	0	0	0	0	0	0	0	0	0	0	0	0	0	0
EPHA2	86	0	0	0	0	0	0	2	0	0	0	0	0	0	0	2	0	0	8	0	0	0	0	0	40	0	2	2	0	0	32	0	0	0	0	4	0	0	0	0	0
ARHGEF19	1265	1486	1340	845	397	1246	685	1355	504	858	866	2233	0	1462	1388	2737	744	205	157	315	379	196	26	167	957	35	76	174	62	114	207	186	154	136	0	0	108	88	68	152	0
RSG1	592	382	72	432	20	260	131	342	438	285	607	491	0	426	0	384	4	8	6	13	0	25	0	46	55	0	12	10	39	4	35	0	12	6	0	32	18	6	72	5	0
SZRD1	5310	4212	4776	4027	4508	3010	4457	3932	4285	4953	5175	4291	4744	3252	3305	4885	3013	2104	1884	1591	1600	1609	1474	1713	10842	2009	2190	2279	5423	1815	2923	3589	1886	2663	2311	16078	1419	3386	8900	1689	564
SPATA21	282	27	0	18	5	61	7	91	7	45	57	50	0	19	3	9	14	219	75	24	22	65	2	171	181	71	0	31	0	77	53	14	13	25	23	18	9	29	0	12	24
CROCCP3	217	263	97	488	159	199	248	393	338	600	33	258	146	1090	696	587	43	308	352	237	29	284	199	284	680	245	115	249	1002	273	733	53	82	275	200	248	241	72	53	247	98
RNU1-1	1831	188	42	2046	782	2172	5637	1504	1677	915	2227	384	0	139	124	1081	853	99	103	51	167	47	37	828	299	861	3118	523	124	227	1016	8	207	0	5	1	5	23	1	128	4
LINC01783	0	0	2	20	4	8	16	10	76	26	0	119	0	0	0	0	0	8	2	0	6	2	0	44	57	6	0	32	0	0	0	0	0	0	0	0	0	0	0	4	0
FAM231B	0	0	0	0	0	0	0	0	0	0	0	0	0	0	0	0	0	0	0	0	0	0	0	0	0	0	0	0	0	0	0	0	0	0	0	0	0	0	0	0	0
CROCCP2	2968	4071	1063	2720	159	2981	255	4854	833	3621	1469	4934	2759	2745	1051	6090	723	605	219	382	65	772	109	676	294	494	58	1014	266	556	282	365	137	164	328	1279	60	151	251	266	2
MST1P2	34	292	6	291	16	223	15	421	4	121	79	846	802	74	16	309	4	6	2	19	19	18	18	69	30	28	100	100	22	36	64	2	19	41	0	4	41	12	15	52	4
RNU1-3	11	4	0	39	11	47	120	22	37	5	26	16	0	8	1	10	7	2	1	1	1	0	0	8	6	9	31	0	0	1	4	0	1	0	0	0	0	0	0	0	0
FAM231A	0	0	0	0	0	0	0	0	0	0	0	0	0	0	0	0	0	0	0	0	0	0	0	0	0	0	0	0	0	0	0	0	0	0	0	0	0	0	0	0	0
RNU1-4	48	2	1	68	26	64	253	36	29	28	39	7	0	11	12	19	6	5	2	0	2	1	4	44	24	33	108	3	0	1	28	0	6	1	2	0	0	3	0	4	0
MST1L	0	2	18	2	0	0	14	0	0	44	16	0	0	0	0	2	0	0	0	3	3	26	0	0	2	79	0	0	0	0	14	1	0	32	0	2	0	0	4	30	0
LOC102724562	0	0	0	0	0	4	0	0	0	0	0	4	0	0	0	0	0	0	0	0	0	0	0	0	0	0	0	0	0	0	0	0	0	0	0	0	0	0	0	1	0
MIR3675	0	0	0	0	0	0	0	0	0	0	0	0	0	0	0	0	0	0	0	0	0	0	0	0	0	0	0	0	0	0	3	0	0	0	0	0	0	0	0	0	0
LOC105376805	632	2221	83	1650	26	2385	0	2332	230	1421	44	3816	0	2490	0	3323	82	1293	87	1112	38	502	6	1089	549	1186	46	687	42	3311	2	759	24	2	0	0	0	0	0	721	4
RNU1-2	292	59	59	380	193	160	1017	143	242	97	415	77	0	25	34	198	71	51	34	26	41	7	5	181	103	147	786	138	11	57	227	3	34	8	7	2	3	0	1	21	0
CROCC	1622	935	158	1007	399	4244	84	1668	114	1119	1179	1330	8	2282	2250	3206	14	51	17	17	6	24	0	89	31	75	2	48	2	81	18	27	6	24	83	2121	2	18	153	17	0
ATP13A2	1620	2735	286	2632	921	3476	442	3342	4135	4499	1135	2534	1624	2250	2042	6087	2	50	69	56	5	33	2	113	82	39	0	34	70	58	76	18	36	80	98	3523	58	30	727	11	0
SDHB	14099	7507	15753	8662	14054	4094	11371	7779	9927	8032	13026	7244	8322	4331	11745	6161	3154	2286	5862	2311	5846	2412	2922	1790	6994	2494	5733	3947	7376	2589	5239	4843	3710	6917	7813	5334	6247	10470	2209	1964	590
PADI3	0	0	0	0	0	0	0	0	0	0	0	0	0	0	0	0	0	0	8	1	0	2	0	0	0	0	0	0	0	0	0	0	0	0	0	2	0	0	0	0	0
MIR3972	0	0	0	0	0	0	0	0	0	0	0	0	0	0	0	0	0	0	0	0	0	0	0	0	0	0	0	0	0	0	0	0	0	0	0	0	0	0	0	0	0
PADI4	90	590	0	70	0	356	0	484	0	310	0	190	0	310	0	640	0	115	20	193	24	111	3	120	0	166	0	219	0	223	0	94	5	2	0	2	30	0	0	111	2
PADI6	0	0	0	0	0	0	0	0	0	145	0	23	0	0	0	0	0	0	0	2	0	0	0	16	2	4	0	0	9	8	0	0	0	1	0	0	6	0	0	0	0
RCC2	2160	4231	1053	2355	4399	2181	2525	2650	2443	3212	2083	2410	1442	2081	2325	3477	2123	3425	5963	2309	3482	2395	2790	2102	4036	1283	3400	2614	3107	1547	5050	1795	1941	2502	7129	23750	2695	4348	8986	2200	2811
LINC01654	0	0	0	0	0	0	0	0	0	0	0	0	0	0	0	0	0	0	0	0	0	0	0	0	0	0	0	0	0	0	14	0	0	0	0	0	0	0	0	0	0
KLHDC7A	0	0	0	0	0	0	0	0	0	0	0	0	0	0	0	0	0	0	0	0	0	0	0	0	0	0	0	0	2	4	0	0	0	0	0	0	0	0	0	0	0
TAS1R2	0	0	0	0	0	0	0	0	0	0	0	0	0	0	0	0	0	0	0	0	0	0	0	0	0	0	0	0	0	0	0	0	0	0	0	0	0	0	0	0	0
ALDH4A1	1780	512	400	20	106	230	1048	122	1263	202	1370	0	2296	597	235	226	242	38	23	6	80	10	72	41	48	4	114	142	296	33	126	5	52	26	28	206	76	89	390	17	6
MIR4695	0	0	0	0	0	0	0	0	0	0	0	0	0	0	0	0	0	0	0	0	0	0	0	0	0	0	0	0	0	0	0	0	0	0	0	0	0	0	0	0	0
MIR1290	3	0	0	0	14	0	0	0	0	0	0	0	154	0	0	0	0	8	1	1	1	0	0	7	0	0	0	0	0	0	6	3	4	0	0	0	8	0	0	1	5
LOC101927895	190	55	134	223	78	209	168	142	0	456	46	199	31	197	60	182	86	113	121	117	54	48	20	186	73	411	183	258	82	219	95	101	27	118	54	39	60	28	9	140	11
EMC1	3319	2242	201	2194	1638	1103	2041	1536	1424	2835	2437	2212	0	310	5028	2477	3169	2795	1946	1706	2107	1429	1111	1415	1911	1207	838	1807	2664	528	2208	739	836	3615	3499	3541	2590	4511	2749	1281	651
MRTO4	7456	4176	8120	5502	9014	3062	8075	5879	8409	3182	11400	4704	4169	2870	5547	3845	3854	1465	2533	1400	3127	1267	2305	1453	2740	752	3381	1443	2128	1417	4375	1313	2145	2799	5345	6775	3504	9044	2997	973	1123
AKR7L	25	77	6	14	41	7	13	11	7	116	17	57	2	104	12	8	15	29	30	6	1	3	21	42	31	8	0	62	96	6	52	1	13	30	15	65	33	9	2	25	0
AKR7A3	1	6	0	2	33	0	2	60	2	65	1	1	0	97	1	0	7	10	4	1	6	6	0	13	10	14	2	19	12	0	12	0	3	0	6	33	6	0	4	2	0
LOC100506730	53	0	40	0	0	0	0	10	2	0	0	0	2	0	32	126	0	144	163	85	37	76	42	49	34	72	0	128	1	12	88	18	81	177	155	478	33	42	69	57	18
AKR7A2	7677	5703	3072	3615	3744	3270	5499	5487	4139	5291	4813	5146	2088	2908	3471	5766	3296	212	304	145	170	120	150	272	192	71	661	388	121	234	259	78	213	429	461	2129	291	139	699	124	93
PQLC2	2059	1080	580	1021	692	797	295	1128	766	663	876	1522	106	204	786	1914	4	132	79	41	46	41	38	198	70	135	100	283	26	121	103	86	58	94	40	440	61	16	116	46	0
MINOS1	11398	5449	13339	5194	8034	3589	7752	6171	6368	4509	7730	6669	5510	3347	6336	4660	6088	2043	3135	1947	3134	1486	2436	1963	3224	1962	5002	2894	5708	2192	4313	2676	2744	5773	6559	2454	4490	3908	600	1646	535
MINOS1-NBL1	0	0	0	0	0	0	0	0	0	0	0	0	0	0	0	0	0	0	0	0	0	0	0	0	0	0	0	0	0	0	0	0	0	0	0	0	0	0	0	0	0
RPS14P3	1046	1548	4566	2683	3557	1592	2514	1615	2456	3152	2944	2974	2434	1448	1684	1536	1474	1257	1195	2172	3268	1779	1264	2239	1995	1750	4452	7173	9215	2289	2066	2569	1681	1660	1173	1752	2168	1434	301	1783	603
NBL1	234	0	0	0	16	67	15	0	68	13	197	0	16	7	32	0	23	0	0	0	0	0	0	0	0	0	0	0	0	1	8	0	0	0	0	32	0	0	0	0	0
HTR6	1601	0	0	0	545	0	866	0	3888	0	0	0	0	0	248	0	0	2	80	2	22	0	32	9	8	0	0	0	104	2	8	0	4	0	0	0	0	6	34	0	2
RNF186	0	0	0	0	0	0	0	0	0	0	0	0	0	0	0	0	0	0	0	0	0	0	0	0	0	0	0	0	0	0	0	0	0	0	0	0	2	0	0	0	0
OTUD3	500	272	230	698	546	50	450	634	531	543	1012	413	1718	406	351	379	406	616	475	189	177	416	175	664	277	344	475	194	1339	235	1012	307	758	412	238	707	336	356	455	252	225
PLA2G2E	0	0	0	0	0	0	0	0	0	0	0	0	0	0	0	0	0	0	0	0	0	0	0	0	0	0	0	0	0	0	0	0	0	0	0	0	0	0	0	0	0
PLA2G2A	0	0	0	0	0	0	0	0	1712	0	0	0	0	0	0	57	0	0	10	0	0	0	0	0	0	0	0	0	0	0	0	0	0	0	0	0	0	0	0	0	0
PLA2G5	0	0	0	0	0	0	0	0	0	0	0	0	0	0	0	0	0	0	25	0	28	2	0	10	12	0	0	0	0	0	0	0	0	0	0	0	0	0	0	6	0
PLA2G2D	461	94	0	750	471	460	681	644	4504	1706	2	244	0	0	0	1543	1438	34	51	18	590	62	603	13	80	0	0	76	726	48	397	12	74	2	81	50	0	0	0	21	92
PLA2G2F	64	0	0	0	0	0	50	0	0	0	0	0	0	0	0	0	0	0	8	0	0	0	0	0	14	0	0	0	0	0	45	0	0	0	0	2	0	0	0	0	0
PLA2G2C	0	0	0	0	0	0	0	10	0	11	12	0	0	0	0	0	0	0	21	0	0	2	0	0	0	0	0	0	0	0	6	0	0	0	0	2	24	0	0	2	0
UBXN10-AS1	78	21	0	0	0	10	0	0	0	76	46	48	0	0	0	22	0	6	279	2	24	2	0	2	47	4	0	61	72	4	81	8	18	0	0	0	46	0	0	10	0
UBXN10	94	54	0	0	38	1	0	0	0	5	0	0	750	0	0	110	0	8	238	6	70	22	0	46	34	0	0	0	0	14	560	0	0	2	0	0	112	0	0	24	0
VWA5B1	0	0	0	0	0	0	0	0	0	0	0	0	0	0	0	0	0	0	30	0	0	0	0	0	0	0	0	0	0	0	14	0	0	0	0	0	0	0	0	0	0
CAMK2N1	496	0	0	0	2	0	0	0	20	0	0	0	0	0	0	0	0	0	324	0	10	0	0	0	6	0	4	4	4	4	240	2	74	530	38	172	100	30	26	0	0
MUL1	6286	3806	2354	1330	502	2895	3023	1702	3696	8532	4115	3809	838	2203	3008	2254	1502	562	713	468	495	247	365	378	233	82	270	444	492	270	786	328	253	620	755	2654	364	727	922	430	305
FAM43B	0	0	0	0	0	0	0	0	0	0	0	0	0	0	0	0	0	0	0	0	0	0	0	0	4	0	0	0	0	0	0	2	0	0	0	0	0	0	0	0	0
CDA	0	0	0	0	0	0	0	0	0	0	0	0	0	0	0	52	0	0	222	0	10	0	0	0	0	0	0	0	2	0	0	0	0	0	5	0	0	0	0	0	0
MIR6084	0	0	0	0	0	0	0	0	0	0	0	0	0	0	0	0	0	0	0	0	0	0	0	0	0	0	0	0	0	0	0	0	0	0	0	0	0	0	0	0	0
DDOST	38049	19120	27408	12660	22440	12864	31614	20295	22495	19641	40165	19478	16673	11148	29444	20336	14873	7298	11467	6194	21429	4950	8242	5719	11218	2480	10744	4174	18328	3450	17400	4538	4030	10375	13097	15306	8513	13622	7575	6084	1792
KIF17	0	0	0	0	0	0	0	0	0	0	0	0	0	0	0	0	0	0	4	1	0	0	4	0	0	0	0	0	8	0	15	0	6	0	2	3	7	0	3	0	2
SH2D5	0	0	0	0	0	0	36	0	9	0	4	0	0	0	24	0	0	0	4	0	0	0	0	6	0	0	0	0	0	0	12	0	0	0	20	95	37	0	30	0	0
MIR1256	0	0	0	0	0	0	0	0	0	0	0	0	0	0	0	0	0	0	0	3	3	2	0	0	0	0	0	0	0	0	0	5	0	0	0	0	0	0	0	2	0
LOC100506801	93	491	233	461	354	639	853	340	956	792	379	1165	775	611	95	524	55	318	303	224	245	266	50	272	202	346	435	402	415	314	394	88	70	37	11	28	42	24	60	276	93
NBPF3	362	397	553	306	93	86	241	340	439	480	133	566	0	22	0	174	8	153	176	29	54	120	21	257	298	132	107	247	317	22	204	185	114	195	0	2	143	51	67	96	4
RAP1GAP	1139	0	0	0	54	18	138	0	54	17	40	0	0	0	0	0	2	0	113	0	1	1	9	10	44	0	0	0	0	0	131	0	0	6	114	1387	53	7	21	0	0
CELA3B	0	0	0	0	0	0	0	0	0	0	0	0	0	0	0	0	0	0	0	0	0	0	0	0	0	0	0	0	0	0	0	0	1	0	0	0	0	0	0	0	0
CELA3A	0	0	0	0	0	0	0	17	0	0	0	0	0	0	0	0	0	0	1	0	0	0	0	3	0	0	0	0	0	0	0	0	0	0	0	0	0	2	0	0	0
LINC01635	28	28	24	129	53	214	146	114	46	5	176	126	0	177	0	68	217	3	69	6	6	0	4	58	8	113	125	23	40	12	22	1	9	21	0	3	28	31	15	20	0
LINC00339	1278	1156	20	1309	221	1908	770	1573	48	1561	595	1336	0	589	379	2333	135	1207	1003	708	409	898	238	961	265	1135	446	668	349	1860	754	283	261	933	496	572	558	243	252	617	3
WNT4	0	0	0	0	0	0	0	0	0	22	0	0	0	0	0	4	0	4	0	12	28	26	2	8	26	12	0	100	0	22	2	2	0	28	4	14	6	37	10	0	0
MIR4418	0	0	0	0	0	0	0	0	0	0	0	0	0	0	0	0	0	0	0	0	0	0	0	0	0	0	0	0	0	0	0	0	0	0	0	0	0	0	0	0	0
EPHA8	0	0	0	0	0	0	0	0	0	0	2	0	0	0	0	0	0	0	0	0	0	0	0	0	0	0	0	0	0	0	6	0	0	0	0	0	0	0	0	0	0
MIR6127	0	0	0	0	0	0	0	0	0	0	0	0	0	0	0	0	0	0	0	0	0	0	0	0	0	0	0	0	0	0	0	0	0	0	0	0	0	0	0	0	0
C1QA	0	128	0	214	0	364	10	382	548	162	0	66	0	0	0	392	0	8	12	8	0	2	0	8	6	26	0	20	0	20	2	2	44	0	0	0	0	0	0	2	0
C1QC	0	0	0	52	12	18	24	202	147	128	0	4	326	0	0	46	0	0	18	0	4	14	2	26	4	0	0	0	0	50	70	0	20	0	0	0	0	0	0	4	0
C1QB	62	34	0	74	42	76	126	274	402	48	0	0	0	0	0	158	288	0	8	0	6	6	0	44	16	0	0	0	0	0	36	0	28	0	2	0	0	0	0	4	2
MIR4684	0	0	0	0	0	0	0	0	0	0	0	0	0	0	0	0	0	0	0	0	0	0	0	0	0	0	0	0	0	0	0	0	0	0	0	0	0	0	0	0	0
MIR4253	0	0	0	0	0	0	0	0	0	0	0	0	0	0	0	0	0	0	0	0	0	0	0	0	0	0	0	0	0	0	0	0	0	0	0	0	0	0	0	0	0
LACTBL1	0	0	0	0	0	0	0	0	0	0	0	0	0	0	0	0	0	0	0	0	0	0	0	0	0	0	0	1	0	0	0	0	0	0	0	0	0	0	0	0	0
C1orf234	0	0	0	0	0	0	0	22	0	0	0	0	0	0	0	0	0	0	0	0	5	4	0	0	0	0	0	0	21	5	3	0	0	0	2	5	7	2	0	0	0
KDM1A	7848	5843	5505	4167	5276	3025	4701	5857	4918	5614	7062	5047	861	2186	5203	5739	2645	1195	1714	723	1582	712	821	1132	2384	548	1030	2138	3471	738	1842	1125	1016	2349	2092	7640	1913	1004	2508	786	1840
MIR3115	0	3	0	0	0	0	0	0	0	0	0	0	0	0	0	0	0	12	4	0	0	6	0	1	9	0	10	0	0	3	0	1	1	2	0	0	0	0	0	9	0
MIR4419A	0	0	0	0	0	0	0	11	0	0	0	0	0	0	0	0	0	3	0	1	0	2	0	7	0	16	0	0	1	3	0	0	0	0	2	0	0	0	0	0	0
HTR1D	0	0	0	0	0	0	10	0	0	0	0	0	0	0	0	0	0	0	0	0	0	2	0	0	4	2	0	0	0	1	0	0	0	0	0	0	0	0	0	0	0
LINC01355	0	210	4	339	28	2	0	2	0	8	0	306	0	0	0	113	6	159	58	39	79	322	161	302	164	3	246	342	186	49	85	10	146	295	155	144	303	303	161	36	77
HNRNPR	21417	16736	7700	16676	15726	11827	13943	20908	15790	18023	15201	18040	9114	7651	12747	19758	11679	9646	11137	6262	7326	6469	6237	7357	11607	6461	6865	9847	14268	4276	12525	5237	5355	10103	12899	15656	8014	12868	9764	5273	2002
ZNF436	26	590	0	0	68	14	164	22	385	314	647	24	0	0	53	230	100	136	356	109	240	186	154	166	268	16	88	104	16	156	467	182	201	537	368	436	348	518	675	180	36
ZNF436-AS1	131	302	33	36	34	0	36	176	2	92	54	114	0	0	406	369	906	2	4	6	13	2	12	40	8	0	0	0	32	2	24	9	2	27	18	32	58	42	34	17	0
ASAP3	0	0	0	2	0	0	0	286	0	26	0	0	0	0	0	32	0	12	10	13	20	14	0	12	3	34	0	2	0	2	0	0	4	26	91	439	0	0	38	10	0
LOC101928163	2	0	0	0	0	0	0	0	0	0	0	0	0	0	0	0	0	0	0	0	0	1	0	0	2	0	1	0	0	0	0	0	0	10	0	0	5	18	4	0	0
ID3	242	9748	0	9202	26	11054	60	13963	642	8802	170	12669	490	9340	46	12169	0	2053	10	1533	38	1500	2	1971	45	3382	6	2078	0	3227	54	2109	76	38	1018	1877	62	18	44	1104	0
MDS2	0	86	103	228	0	203	0	453	52	158	0	367	0	184	0	257	0	235	17	193	4	137	0	247	10	260	0	413	1	161	0	78	0	0	2	0	0	0	0	158	0
RPL11	10956	25363	33343	35520	37822	29718	26554	29573	20318	31866	25918	39823	33690	18637	14609	27170	14799	40170	30719	48887	64367	34982	22905	54025	26878	52803	53017	65806	74718	67701	24099	42258	22148	26757	30541	76352	20150	27959	26841	33966	6378
ELOA	6223	3824	2014	3805	4081	3646	3978	5532	6265	6312	4986	4745	7686	1115	3710	4829	3428	3280	5011	2800	4944	2200	2174	3350	2453	2110	1917	3636	7497	2005	2711	1266	1488	2655	5677	4141	2872	6636	3096	2094	1357
ELOA-AS1	282	309	204	175	89	193	109	291	75	284	106	418	0	310	71	333	61	171	91	172	97	108	41	267	72	159	166	169	106	336	25	68	61	146	83	49	114	88	48	115	7
PITHD1	5511	4518	3586	4212	4360	3539	6116	6226	5768	9007	3444	4762	286	3519	3019	4967	2853	847	849	367	467	512	412	824	428	924	2019	629	1114	987	640	1124	806	1055	1348	4178	640	1499	1573	509	394
LYPLA2	10674	5984	6082	4064	4268	4600	6159	6713	8554	5997	6955	6122	5976	5408	7647	6572	2669	579	1257	750	1515	655	554	1493	1500	440	874	513	1407	736	1538	770	917	1561	2667	5919	874	1862	1567	410	78
GALE	5256	1119	6969	747	5408	440	7349	911	3873	384	2826	514	7822	2194	5185	609	3940	66	1088	136	1038	109	440	84	396	158	1088	406	354	136	1980	156	158	789	469	983	426	641	672	37	142
HMGCL	3807	4727	1889	2591	1353	2220	1587	2730	2031	2207	2095	5889	4902	2708	2061	4409	292	1759	2358	2657	2354	1582	917	1277	765	1206	676	2640	5414	1716	949	1924	1139	5594	2247	950	1742	1315	646	1422	227
FUCA1	2721	1666	746	1471	684	1056	465	1809	2879	2277	1376	1392	160	1726	2165	1887	886	778	320	339	154	432	78	632	272	567	298	668	676	313	535	651	332	566	88	163	112	948	2150	308	259
CNR2	0	10303	2	8761	2	7037	11	8576	265	10302	0	11324	0	2158	2	9110	6	6738	2	6534	42	4646	4	6881	24	3445	11	5917	0	4168	10	1846	4	6	5	0	2	8	1	5055	69
MIR378F	0	0	0	0	0	0	0	0	0	0	0	0	0	0	0	0	0	0	0	0	0	0	0	0	0	0	0	0	0	0	0	0	0	0	0	0	0	0	0	0	0
PNRC2	5511	11871	3366	11742	7160	8187	2825	11274	5123	9454	2673	14137	4299	5824	4144	12700	3178	8898	8032	7758	4295	8664	4093	6318	6209	5247	6516	4996	9369	4620	7988	8997	4504	11598	7703	3679	5785	12210	5027	5805	1821
SRSF10	12487	13231	14336	12421	13516	11112	13157	14173	11935	18104	18552	12156	8133	12851	12692	13360	9490	14706	21699	13409	12199	15313	11013	12871	17078	13434	15257	17872	34109	8961	18411	13522	13411	19246	23417	9391	17879	35019	9670	9972	5346
MYOM3	0	0	0	0	0	0	0	0	0	0	0	0	0	0	0	0	0	0	0	0	0	0	0	0	1	0	0	0	0	0	0	0	0	0	0	0	0	0	2	0	0
IL22RA1	0	0	0	0	0	32	0	0	0	0	0	0	0	0	0	0	0	0	18	0	0	0	0	0	0	0	0	0	0	0	0	0	0	92	86	293	0	61	112	0	0
LOC284632	0	0	0	0	0	0	0	0	0	0	0	0	0	0	0	0	0	0	0	0	0	2	0	0	0	0	228	0	0	0	0	0	55	2	2	4	0	30	8	0	12
GRHL3	0	6	0	0	0	0	0	3	0	0	0	0	0	0	13	0	0	5	14	4	18	0	0	7	16	0	0	0	1	0	59	0	26	36	0	9	12	10	4	0	12
STPG1	464	238	94	554	206	434	333	991	816	234	525	243	192	245	154	507	0	446	701	245	76	268	47	198	201	155	972	441	519	108	274	76	394	516	502	719	75	322	171	242	88
RCAN3AS	4	13	0	24	0	95	0	93	0	13	0	65	0	21	0	13	0	23	0	5	0	26	0	17	0	20	0	93	0	15	0	4	0	3	0	2	4	8	2	6	4
RCAN3	415	802	0	1040	0	1349	107	2293	436	1671	58	1227	0	857	88	1987	8	481	172	395	13	450	40	321	96	535	21	1134	170	490	101	346	134	269	276	761	45	125	416	365	0
LOC100506985	70	70	0	117	0	92	0	109	0	116	8	80	0	22	0	116	0	997	180	384	12	826	9	500	82	508	0	672	0	231	67	220	63	305	337	158	61	209	35	369	58
SRRM1	16743	11081	5249	14147	9743	16282	10853	17915	11344	26099	11686	15083	12965	14386	6454	14988	9442	15064	16498	12339	9541	11573	7991	14458	11355	14006	16496	19503	24695	11687	14703	7691	8734	9799	13352	5797	10651	18045	6442	10992	4632
RUNX3	15940	12157	2340	7370	4153	13691	4595	19272	8146	26800	9899	18093	3607	11025	12802	15120	3179	2512	3112	2133	1589	2004	605	2563	2550	2092	1247	3707	4948	2184	2651	3146	1850	2515	1319	7206	1558	2127	2999	2083	790
MIR6731	0	0	0	0	0	5	0	0	0	6	0	0	0	6	0	0	0	0	0	0	1	1	0	0	0	4	0	0	0	0	0	0	0	0	2	0	0	0	0	0	0
MIR4425	0	0	0	0	0	0	0	8	0	24	0	0	0	0	0	0	0	0	1	0	0	1	0	2	0	16	0	0	0	0	0	0	2	0	0	0	3	0	0	0	0
SYF2	8235	9948	4747	9705	5595	7355	4966	8658	6074	11113	10002	10322	4523	7302	5216	10776	2817	4924	4582	5131	4239	6393	1351	4879	2263	6044	3212	5481	9356	6182	3410	11487	2817	5442	3104	2695	2682	4447	1602	3474	576
RSRP1	44820	36719	19315	33829	14917	24999	8613	37844	10633	18294	22182	31613	10843	49443	19544	55183	10409	10608	9934	7461	2834	8554	2667	20514	4885	13518	6209	22680	19500	5355	5293	11520	4490	3942	1725	1758	1917	3397	1310	9082	503
RHD	0	40	106	56	1	155	35	16	17	2	58	238	0	4	0	2	0	207	142	30	16	82	5	133	27	144	0	118	204	42	0	40	61	168	55	16	1	39	8	38	0
TMEM50A	18048	10886	7933	8962	11608	3540	8183	8272	12084	7012	14999	8235	10323	5695	20607	8250	3824	3957	9778	2987	9349	3032	3856	2777	7399	2070	4415	3253	20031	2051	8086	2867	4046	9561	4923	5064	4469	10301	6257	2234	1653
LDLRAP1	1801	396	145	379	220	160	214	302	323	1301	754	1838	0	703	408	1176	0	16	195	48	16	107	12	113	143	6	60	20	114	52	50	78	85	104	81	435	29	32	201	75	2
SELENON	1793	314	229	382	879	245	106	263	523	520	254	57	0	336	505	578	105	202	354	195	123	317	24	437	154	58	49	404	456	200	811	332	298	2711	7	11	337	562	2201	334	18
MTFR1L	4547	3282	2415	2462	2927	2177	2847	4436	2687	3186	3767	3862	3830	2655	1997	5321	2394	1791	1769	842	935	1195	885	1595	1422	1025	551	1236	4042	599	1983	1163	1367	2339	1786	1704	1683	1303	812	1159	208
LOC646471	256	249	66	233	91	356	76	328	94	108	167	362	6	229	54	500	0	216	53	50	8	67	32	169	40	41	17	61	132	63	137	5	54	29	35	33	44	9	54	97	0
AUNIP	2018	90	884	130	1085	0	564	6	407	42	1040	0	926	2	1031	58	0	13	185	9	171	10	123	43	294	0	494	0	269	0	290	2	245	637	456	586	496	588	390	4	22
PAQR7	262	12	24	38	194	0	18	2	492	16	74	10	14	2	16	0	16	110	647	21	114	187	24	184	350	38	1037	282	1041	87	447	130	776	591	189	284	249	278	192	34	14
MIR3917	0	0	0	0	0	0	0	0	0	0	0	0	0	0	0	0	0	0	0	0	0	0	0	0	0	0	2	0	0	0	0	0	0	0	0	0	0	0	0	0	0
PAFAH2	483	1078	78	1036	442	690	572	1031	248	724	340	1445	0	480	498	1182	10	495	553	567	496	381	352	320	163	331	189	418	1105	323	357	190	215	437	623	611	328	726	511	267	28
EXTL1	57	0	0	0	32	30	0	0	6	0	0	0	0	0	0	0	0	0	9	0	0	0	3	5	0	0	8	0	9	14	24	0	0	0	0	2	24	20	1	0	0
SLC30A2	0	0	0	0	0	0	0	0	0	0	0	0	0	0	0	0	0	0	0	0	4	1	0	0	0	0	0	0	0	0	0	0	17	0	0	0	0	0	0	0	0
TRIM63	0	0	0	0	0	0	0	0	0	0	0	0	0	0	0	0	0	0	2	0	0	0	0	0	0	0	0	0	0	0	0	0	0	1	0	0	0	0	0	0	0
PDIK1L	192	524	0	465	212	305	320	249	327	576	290	529	307	138	496	214	72	721	943	573	539	646	564	373	1137	616	654	960	1304	341	910	337	556	1402	1010	720	919	1916	643	461	152
FAM110D	0	0	0	0	0	0	0	0	0	0	0	0	0	0	0	0	0	0	0	0	0	0	0	0	0	0	0	0	0	0	4	0	0	0	0	0	0	0	0	0	0
ZNF593	2738	1756	8186	1966	3893	2164	5526	2740	3786	4020	5549	2052	3650	3055	4552	1518	1768	301	495	244	607	255	570	520	847	220	848	118	452	426	1201	320	1109	658	1046	1174	550	1131	575	108	32
CNKSR1	105	120	0	0	35	0	24	245	0	202	0	106	0	0	0	122	2	25	42	14	7	45	0	30	28	137	1	4	2	21	58	2	2	17	0	39	22	30	35	0	8
CATSPER4	0	0	0	0	0	0	0	0	0	0	0	0	0	0	0	0	0	0	1	0	0	0	0	0	0	0	0	2	0	0	4	0	0	0	0	0	0	0	0	0	0
LOC101928303	52	0	0	0	0	0	0	0	0	0	0	2	0	0	0	0	0	0	0	0	0	0	0	0	0	0	1	1	0	10	13	0	2	0	0	0	0	4	1	0	0
CEP85	298	652	212	608	1289	541	1149	736	358	30	903	197	0	326	592	489	824	660	1663	419	1032	469	706	670	2014	132	705	392	1757	218	1461	108	569	1509	1494	2185	1242	2566	2050	331	304
UBXN11	2237	2634	4434	2127	1388	4021	864	5877	1734	3577	4088	4866	4161	5598	814	5743	905	234	256	209	70	277	53	691	398	266	129	727	276	338	317	136	80	111	10	209	101	179	219	211	30
CD52	15904	137217	2463	141202	287	102118	970	146733	4311	122922	3558	155297	10448	95390	19	189998	683	95016	3704	104672	1628	65675	243	102949	2397	92099	499	141642	4994	137522	648	96402	1772	106	68	0	84	126	4	66547	177
AIM1L	0	195	0	255	46	203	0	145	0	189	0	232	0	12	0	210	0	251	5	202	6	155	2	113	0	107	0	240	0	89	72	15	8	6	33	12	16	13	0	117	2
ZNF683	1101	0	0	0	0	0	0	0	0	0	0	0	0	0	0	0	533	5	0	0	0	0	0	0	0	0	0	0	0	6	0	0	0	0	0	0	0	0	0	0	0
DHDDS	1442	1546	278	1470	1390	1031	2076	2331	2061	1043	1360	2106	61	873	1761	2381	723	1289	2110	957	2402	916	848	954	927	692	1310	1032	4008	745	1461	803	1260	805	1027	1115	1142	2157	1026	730	176
LOC101928324	10	24	0	26	0	0	17	35	0	16	0	31	0	0	25	27	48	93	29	29	22	49	22	48	16	20	11	122	22	39	2	13	38	34	9	4	36	12	7	50	0
HMGN2	23198	17473	12511	17086	5980	13005	11471	22664	8491	19147	13845	20923	7937	10083	6138	17917	8648	11114	17537	9501	15206	12032	3850	12384	23005	13110	27931	6538	9533	12154	14103	15463	6372	16814	24766	14290	20993	14615	5610	6181	1796
MIR1976	0	0	0	0	0	0	0	0	0	0	0	0	0	0	0	2	0	0	0	0	0	0	0	3	0	0	0	0	0	0	0	0	1	0	0	0	0	0	0	0	0
LOC101928728	267	36	76	227	120	280	242	326	440	24	576	20	25	0	0	14	0	8	8	22	50	13	38	174	56	57	260	80	93	28	228	0	16	32	58	70	86	102	108	14	32
ARID1A	1518	3657	1120	9064	1848	3815	2247	4494	2637	4131	1680	4618	2776	4906	4856	6243	1034	8464	6723	7879	5401	7278	2503	6699	5130	6037	2787	8143	9707	4526	6331	6381	3413	5388	5303	9122	3200	6780	8969	7323	2806
PIGV	1369	1091	502	1007	1293	238	660	413	1824	853	3221	751	1550	384	2479	1444	1440	341	3140	445	1358	462	317	226	918	220	1241	651	3000	202	1788	451	662	1856	999	646	710	289	660	235	157
ZDHHC18	1488	386	914	274	1151	490	1711	1283	807	1230	2267	975	3986	1170	3232	478	2708	226	1023	99	804	122	413	330	471	126	486	46	1480	124	647	123	264	1031	235	3495	213	320	1334	146	74
SFN	0	0	6	0	67	0	90	22	0	0	0	0	0	0	0	28	1081	8	284	0	522	0	2	21	1121	0	1542	0	0	2	1499	0	8	984	0	4	0	16	8	6	0
GPN2	4052	2436	2124	867	1810	901	1308	2516	2443	2244	3952	3467	1743	1697	1631	2665	1814	113	304	177	220	109	71	198	267	256	257	15	611	215	255	35	266	104	281	1261	170	353	659	131	92
GPATCH3	3035	2531	1442	619	874	682	997	2019	1458	4726	1463	2187	2531	1978	1024	1876	1879	516	362	293	281	254	118	255	260	350	273	182	353	274	254	270	96	135	240	464	129	283	316	98	16
NR0B2	0	9	0	0	0	0	0	0	0	0	0	0	0	0	0	0	0	0	0	5	0	0	0	0	0	0	0	0	0	0	0	0	0	0	2	0	2	0	2	0	0
KDF1	0	76	0	58	21	96	0	282	0	122	0	279	0	361	0	150	0	62	1	38	1	47	0	27	0	40	0	0	0	40	0	12	2	0	0	0	0	2	1	52	0
TRNP1	174	0	0	0	0	0	0	0	108	2	2	0	0	0	116	0	63	0	33	0	0	0	0	0	0	0	32	0	2	0	19	0	20	10	0	18	14	16	36	0	0
FAM46B	306	0	0	107	0	0	0	0	0	0	0	0	0	0	0	0	0	0	25	0	0	1	0	2	0	0	2	0	0	0	18	0	0	0	0	2	0	2	3	0	0
SLC9A1	642	750	259	649	648	1828	1213	1525	1094	995	188	1327	102	1538	200	1000	404	177	589	129	283	107	88	220	248	232	124	202	662	227	437	86	148	325	212	1568	76	203	481	167	8
WDTC1	25	697	150	378	46	488	261	586	288	1250	50	474	126	14	245	990	0	606	624	328	197	634	42	684	270	687	68	808	360	506	287	484	213	519	131	2106	138	121	1139	364	30
ACTG1P20	952	1836	596	1006	862	483	564	1508	1556	1178	1090	965	740	942	998	1082	392	698	567	433	302	479	204	412	296	301	158	400	544	269	413	284	342	259	427	162	254	613	290	467	235
SYTL1	1746	34624	604	20872	0	34767	484	46262	1085	38086	466	41983	1762	58672	12	66545	676	493	35	344	8	333	0	1008	6	609	4	1057	6	1063	21	381	4	6	4	8	0	4	13	226	5
MAP3K6	5927	1273	1160	567	576	505	1547	1057	357	1092	486	1209	1526	1061	555	1197	1982	46	754	39	49	30	8	124	37	7	831	161	112	99	457	19	211	147	64	341	4	898	363	56	54
FCN3	0	0	0	0	0	12	0	10	0	0	0	0	0	0	0	0	0	0	8	0	0	0	0	31	0	0	0	0	0	0	0	0	0	0	0	0	0	0	0	0	0
CD164L2	0	0	0	0	0	0	0	0	0	0	0	0	0	0	0	16	0	0	0	0	0	0	0	3	0	0	0	0	0	0	0	0	0	3	0	0	0	0	0	0	0
GPR3	50	8	186	34	164	242	98	352	236	236	334	0	0	92	350	132	178	38	18	24	4	27	0	73	15	152	228	0	0	32	38	21	0	6	16	237	7	14	24	19	0
FGR	254	12664	2	5324	0	2147	117	8283	381	6881	316	3404	0	2120	39	13601	6	1143	55	986	30	1568	4	533	0	516	4	1603	8	1146	26	409	44	8	0	2	0	0	0	820	126
IFI6	2284	12518	1990	1598	717	1803	1841	1806	4331	2904	2881	1666	2404	440	2384	4328	488	171	584	344	158	156	220	510	58	118	587	971	3248	996	325	130	4445	1659	142	768	198	543	1182	71	4
FAM76A	319	459	136	641	407	554	207	514	274	614	343	351	696	487	63	633	90	3245	2645	1292	779	3116	813	2286	1324	2846	835	3176	5403	1082	3074	3549	2684	1658	1731	443	2041	1965	247	1346	722
STX12	1629	3411	1483	2481	1715	1661	852	2843	2462	2489	1773	2428	0	1926	369	2777	74	4463	3498	2845	2813	3629	1586	2292	1890	2495	402	4532	6632	1876	2599	2081	4487	4206	1273	1093	943	2845	1144	2134	1027
PPP1R8	2083	2633	1119	1988	2038	1487	1821	2306	1818	2524	1575	2626	698	889	2062	2868	2515	1642	1731	808	756	719	558	430	949	483	1343	1290	2133	751	1192	635	760	989	1247	3965	880	1351	2371	604	312
SCARNA1	0	0	0	0	9	0	0	10	10	27	0	48	0	44	0	0	0	8	0	7	5	2	6	1	2	2	2	0	0	6	4	0	12	14	3	0	4	11	0	0	0
THEMIS2	4305	5012	328	3059	0	1948	238	7548	3726	7150	413	3803	0	3710	262	5099	0	1529	246	970	120	544	55	1566	51	425	0	1066	142	1119	295	845	623	141	2	3	0	8	59	970	838
RPA2	12334	18228	20177	14957	10620	10009	12086	17297	18092	9936	12386	18889	11646	5562	13692	18080	6623	10004	18986	11346	6929	12034	5723	9753	9172	6442	10912	9646	15060	7378	15873	15111	6994	14568	18738	8013	8841	14284	4311	8924	1459
SMPDL3B	0	0	0	0	447	17	1224	17	950	36	0	26	0	0	0	9	172	6	80	6	7	0	23	4	0	10	0	0	0	0	254	4	1059	20	108	191	67	20	6	0	0
XKR8	1307	932	0	434	788	208	74	1021	3924	910	828	869	0	1394	626	710	1686	113	34	101	136	86	18	99	93	65	54	18	24	89	72	102	447	171	0	27	76	0	29	94	6
PTAFR	95	1435	0	1256	0	1617	194	2293	566	860	0	838	100	876	0	1654	0	321	370	638	118	961	6	222	7	346	3	956	147	267	223	288	256	12	0	12	25	28	42	324	1478
DNAJC8	21499	15237	12870	17691	14409	8752	13067	14439	17358	14058	18389	16971	6886	9357	10693	16002	6966	10535	16413	10354	10011	11117	5223	7571	7739	9861	16540	9050	15603	8603	8995	14443	8829	16713	14389	7732	9774	19898	5752	7359	4361
ATPIF1	17222	10500	17516	10944	12977	10602	11551	15853	18286	9616	15706	14361	9122	11561	11550	15081	3528	3275	5528	4314	5758	2340	2658	5446	2630	2908	9154	3960	5558	6931	3889	5614	3812	5083	4914	3903	6750	6574	1934	2503	356
SESN2	1503	673	1730	904	3095	562	4100	934	2297	1266	1532	1482	209	1332	2684	2084	106	316	604	271	150	81	459	238	103	353	477	159	736	93	413	201	645	576	140	1210	111	349	1210	135	34
MED18	1276	2240	732	1356	849	833	451	873	409	677	293	2017	88	872	436	1232	0	487	848	405	597	327	480	492	450	315	486	952	1338	552	350	176	756	1025	1272	1047	787	607	514	262	119
SNORA73A	1	2	0	7	16	0	18	94	2	1	0	4	0	1	0	6	0	49	72	50	87	95	46	43	31	97	119	9	54	10	87	1	63	29	52	112	20	87	82	46	9
SNORA73B	4	71	42	76	33	10	16	144	28	56	54	134	0	118	0	90	7	134	303	133	268	251	138	131	83	181	100	149	96	69	194	72	114	85	191	108	86	249	60	171	46
TRNAU1AP	2415	2689	962	2204	1342	1479	1558	2069	2878	1737	1807	1649	4058	1895	602	2718	2049	1424	2031	1033	1343	1226	968	1217	1231	1554	3039	2317	3726	1173	1550	1034	1291	1135	1507	1240	707	1983	1085	770	505
SNHG12	251	1052	2295	1004	984	1050	409	1215	1106	1472	648	1503	2397	1477	299	1374	1207	930	1003	771	664	822	653	1788	379	1159	1272	1362	1240	614	781	1157	1007	436	550	794	492	1730	608	422	117
SNORD99	14	32	91	49	20	49	15	13	9	19	0	87	8	34	12	21	18	364	478	120	129	413	105	405	167	290	724	803	238	98	329	532	140	23	37	16	53	161	19	222	48
SNORA61	15	76	181	91	73	32	25	57	33	53	45	81	287	157	51	81	28	258	241	150	97	203	105	359	61	167	152	211	459	68	142	403	206	143	117	197	153	493	155	112	45
SNORA44	0	15	0	82	5	42	24	50	59	28	12	52	0	72	0	38	34	62	21	59	21	26	5	61	13	48	15	70	17	8	46	41	21	4	1	32	6	11	29	21	3
SNORA16A	17	17	0	31	13	4	28	12	0	19	20	38	0	45	0	34	0	25	32	38	17	11	6	36	16	70	18	78	0	50	23	9	10	10	13	42	14	32	43	11	6
RAB42	32	16	0	0	0	0	50	0	108	0	0	0	0	0	90	38	0	0	0	0	0	2	0	0	0	1	0	0	2	0	0	0	0	0	0	0	0	6	2	3	0
RNU11	206	135	110	818	602	1019	606	566	439	365	367	231	104	217	133	474	279	26	10	12	26	25	22	523	59	545	284	47	35	85	80	8	56	16	4	12	2	18	8	23	0
GMEB1	1146	2443	518	1732	594	1780	438	2905	532	2209	778	3786	1	1241	1146	2063	0	880	332	989	224	474	154	729	661	674	245	1025	1011	593	487	305	360	724	294	371	172	774	440	641	101
YTHDF2	18786	11206	6068	10930	12474	11152	18141	13922	16564	19620	16693	15756	11048	7648	15843	14753	4389	4705	6371	3687	5305	4832	3635	6110	6633	3958	5210	4898	13786	3161	8593	5741	3181	5595	6093	4288	5082	7749	3448	2533	2149
OPRD1	93	0	0	0	0	0	0	0	0	0	0	0	0	0	0	51	0	6	0	0	0	0	0	0	55	0	0	0	0	0	0	0	0	0	0	0	0	0	0	0	0
TMEM200B	0	0	0	0	0	0	0	0	0	0	0	0	0	0	0	0	0	0	0	0	0	0	0	0	0	0	0	0	0	0	0	0	0	0	0	0	0	0	2	0	0
MECR	2022	1749	3509	1316	2434	895	1732	1884	1404	2074	1685	1762	1202	1803	3215	2054	466	394	431	183	837	315	392	573	428	180	350	766	568	213	721	216	346	535	943	1670	434	604	420	232	60
LINC01756	0	0	0	0	0	0	0	0	0	0	0	0	0	0	0	0	0	0	0	0	0	0	0	0	0	0	0	0	0	0	0	0	0	0	0	0	0	0	0	0	0
LINC01648	0	0	0	0	0	0	0	0	0	0	0	0	0	0	0	0	0	0	0	0	0	0	0	0	0	0	0	0	0	0	0	0	0	0	0	0	0	0	0	0	0
LAPTM5	15767	129578	270	104228	3556	91429	1785	141472	5487	206731	4754	139762	5014	71750	1176	192422	2936	63488	6762	46256	1417	40616	134	53545	1064	35521	1772	33630	9401	42483	4047	113621	1252	3278	3448	10786	58	916	2397	22174	664
MIR4420	0	34	0	13	0	36	0	48	0	185	0	39	0	59	0	52	0	127	3	99	0	79	0	61	0	43	0	51	0	42	0	27	0	0	0	3	0	0	1	68	0
SDC3	70	0	26	0	508	0	0	0	0	0	176	0	0	2	82	0	34	0	30	2	68	0	32	0	80	1	4	82	114	4	40	0	84	12	58	1555	100	2	60	0	0
SNORD103A	0	0	0	3	2	2	0	0	0	1	0	2	1	0	0	0	0	3	1	2	0	2	0	3	0	0	0	0	0	0	0	0	1	0	0	0	0	0	0	3	2
SNORD103B	0	1	0	9	5	2	0	5	3	13	2	3	1	4	0	3	0	19	7	5	10	6	0	4	8	19	11	10	4	9	8	5	3	2	0	0	3	4	1	14	3
SNORD103C	0	0	0	0	0	0	0	0	0	0	0	2	0	0	0	0	0	1	4	4	2	1	1	6	2	15	0	12	0	2	0	9	2	0	0	0	0	1	2	5	2
NKAIN1	0	0	0	0	2	0	0	8	0	0	0	0	0	0	0	0	0	0	18	0	25	0	0	0	0	0	0	0	0	0	0	0	0	0	0	0	16	2	6	0	0
SNRNP40	8626	8683	13992	6721	11719	3400	9065	7232	6601	4288	10086	8272	5434	4194	14574	5236	5407	1970	3523	1384	3221	1939	2210	2095	4242	809	4078	1901	4736	2178	4240	2164	2711	5998	5823	5264	3038	8873	3011	793	846
ZCCHC17	4213	4082	4041	3224	3610	1575	2783	4344	3444	3025	2942	4634	5402	1217	3294	3885	1846	1993	2632	2731	3108	2128	1133	1842	1898	2276	1414	2441	4403	1708	1733	2380	1404	2843	2755	1943	1386	2612	1026	1974	383
FABP3	8	31	0	171	4	0	39	21	0	0	0	48	340	0	0	32	0	77	42	67	32	65	12	33	17	66	0	203	134	78	31	30	38	44	38	19	16	28	7	54	0
SERINC2	226	199	0	476	1278	168	0	620	38	173	0	104	0	250	0	328	0	58	136	24	4	22	0	5	4	24	0	6	2	16	41	4	16	35	0	2	0	2	20	4	0
LINC01225	0	0	0	0	0	0	0	0	0	0	0	0	0	0	0	0	0	0	0	0	0	0	0	0	0	0	0	0	0	0	0	0	0	0	0	0	0	0	0	0	0
LINC01226	0	0	0	0	0	0	11	4	0	0	0	0	0	0	0	0	0	0	0	15	0	0	0	4	0	0	0	0	0	0	0	0	0	0	0	0	0	0	0	0	0
TINAGL1	0	0	0	0	0	0	0	0	0	0	0	4	0	0	0	0	0	0	0	0	0	0	0	0	0	0	0	0	1	0	0	0	0	0	0	0	0	0	0	0	0
HCRTR1	0	0	0	0	8	0	28	0	0	0	0	0	0	0	0	0	0	2	1	0	0	2	0	0	0	5	0	0	0	0	0	0	0	0	0	0	24	0	0	0	0
PEF1	11739	10588	3572	10742	8702	5368	9118	9834	6010	8036	9002	13653	8521	3959	5144	12040	4810	1492	2673	2354	3694	1298	1175	1629	1511	1017	1586	1445	5718	1150	2310	1653	816	2213	2625	4566	1053	1188	965	1883	438
COL16A1	2076	0	0	0	1026	0	70	12	0	0	205	61	0	13	0	6	1821	0	52	0	45	4	2	0	42	25	0	0	0	0	51	2	3	0	503	7772	6	4	2	4	0
ADGRB2	112	0	0	84	314	0	359	5	330	60	6	0	72	249	50	188	267	3	49	4	6	5	0	2	10	0	0	34	0	7	114	0	17	24	81	2957	15	2	78	0	6
MIR4254	0	0	0	0	0	0	0	0	0	0	0	0	0	0	0	0	0	0	0	0	0	0	0	0	0	0	0	0	0	0	0	0	0	0	0	0	0	0	0	0	0
SPOCD1	0	0	0	0	0	0	27	0	0	0	0	0	0	0	0	0	0	0	16	1	5	0	6	0	0	0	0	0	0	2	0	0	2	6	0	10	0	0	8	0	0
TMEM39B	325	261	116	371	281	182	224	310	184	254	224	353	58	707	172	589	230	665	787	291	290	509	366	539	940	768	305	805	783	478	803	512	315	764	828	1575	269	1286	591	270	57
MIR5585	0	8	0	0	3	4	0	10	0	0	0	8	0	0	0	0	0	4	2	1	0	5	0	19	2	0	0	17	3	19	3	6	3	3	0	0	0	4	0	3	0
TXLNA	3799	3380	1548	3474	3158	1829	4235	3526	3937	2370	4649	2816	3040	2104	2230	4862	1946	4246	8413	2775	5151	3052	2550	3455	8996	929	2716	2249	12022	1646	7877	4402	3159	6131	4634	5672	2072	11076	4928	2318	2016
CCDC28B	22186	971	1948	820	5612	342	3102	1841	2652	856	7771	905	7021	569	8142	1187	2925	153	1574	160	3623	227	1576	185	3371	260	3189	242	5052	222	1505	131	567	1072	4198	5224	1347	1895	666	95	543
IQCC	847	293	0	409	282	416	519	319	450	20	827	363	778	51	751	329	0	84	303	107	388	81	98	77	257	35	753	70	30	109	87	116	232	296	336	928	507	460	204	59	62
DCDC2B	196	88	0	114	25	45	3	114	19	118	20	119	0	327	0	280	0	38	43	23	13	46	23	98	15	13	30	56	111	16	42	0	17	34	13	19	24	24	14	45	14
TMEM234	1206	791	656	939	377	471	294	973	250	1504	625	1077	1296	1129	439	1945	2	270	314	183	92	246	111	432	206	104	25	509	645	206	202	457	144	277	50	51	159	187	114	217	18
EIF3I	24058	14602	27558	16445	23538	14089	18700	19085	19509	15600	26200	14155	10068	9149	20910	13512	7233	9119	15926	8490	20090	7414	8949	6956	14259	8328	16988	8799	19302	6178	11432	8652	9434	14451	35024	20048	16763	26358	6018	7231	1773
MTMR9LP	580	63	0	121	0	72	0	199	0	84	0	564	0	292	175	464	0	47	4	26	10	15	9	42	18	11	12	60	0	22	4	8	30	0	11	9	0	10	6	39	0
FAM167B	89	48	0	45	0	46	0	81	0	54	0	0	0	32	0	98	0	8	0	0	4	4	0	4	0	5	0	22	0	26	0	0	0	0	0	3	4	0	0	0	0
LCK	65324	16220	86	10225	398	12128	860	20509	1706	12045	7667	11327	3747	5758	0	21448	1426	1898	2349	2139	381	1864	38	1240	1547	1963	8	2285	722	1365	34	1738	527	4	4	0	2	2	0	894	10
MARCKSL1	65385	39481	220	30551	24128	15023	3951	31907	5374	23283	19442	28815	37564	13712	20896	28962	12869	1128	801	841	713	913	571	555	528	974	16	937	438	1043	336	937	42	50	904	6008	800	2	0	662	322
FAM229A	367	60	122	29	44	208	0	162	32	199	50	110	0	187	275	290	72	4	2	2	2	6	2	4	0	4	0	5	4	15	3	3	0	10	4	79	2	2	22	1	0
TSSK3	25	8	46	7	6	173	0	83	4	99	145	15	534	27	252	72	17	21	33	10	42	46	6	72	18	139	0	104	119	19	14	0	10	51	132	288	10	55	69	23	0
BSDC1	5409	7976	2837	7023	1023	5216	2369	9374	3149	13266	4021	10057	8204	7425	4150	12766	1570	4197	3206	3289	2187	3888	636	3737	1379	2229	1026	3634	5226	1949	1898	2376	943	2269	841	1003	1063	1421	1202	3338	294
ZBTB8B	12	0	0	0	36	0	0	0	0	0	0	0	0	0	0	0	0	0	0	0	0	0	0	0	0	0	0	0	0	0	25	0	0	0	0	0	0	0	0	0	0
ZBTB8OS	4258	2769	4646	3039	4051	1733	4258	4040	3968	2737	4567	3933	3872	2417	4589	3278	3572	1898	2337	1642	2165	1740	1124	1561	1899	2009	4416	2185	5079	1846	1404	1662	1913	2883	3680	1703	1919	3998	1185	1168	389
RBBP4	6303	8099	5325	4083	5023	4064	7335	6852	6557	4415	4119	8013	1729	2851	10986	8844	1862	9453	17411	5897	8033	9296	7046	5490	10069	4994	11465	7228	17842	7068	13517	5565	6314	14357	15044	6754	12769	19598	6466	4033	1510
KIAA1522	126	0	0	0	5	0	18	2	15	14	28	0	92	0	0	2	0	27	73	0	6	3	10	3	84	2	0	0	20	13	27	0	33	22	5	52	307	20	56	0	30
YARS	8001	7450	10100	7818	11770	7225	23697	8801	15728	6017	11927	11840	13374	4544	8970	8470	6695	2562	6319	2087	4000	2074	4633	2528	3040	1581	3772	1493	4923	1499	6436	1427	3592	5320	3398	5430	4114	8731	7869	1311	2340
FNDC5	96	23	0	36	0	0	0	16	29	0	0	0	0	0	0	15	0	13	5	5	7	31	1	30	0	32	0	5	0	14	60	20	7	7	2	13	6	11	10	12	37
HPCA	8	0	0	0	0	0	0	0	30	4	0	0	0	0	1	0	0	4	0	0	13	1	0	0	11	0	0	0	0	0	0	0	0	4	0	2	2	2	1	0	0
TMEM54	4991	2	10391	2	2654	0	3188	44	11134	0	4490	2	1914	686	8134	139	4834	1	426	0	199	5	90	0	176	0	240	0	636	0	205	0	745	1100	300	2491	118	388	737	0	64
AK2	9155	8949	18601	6396	14420	3238	11776	7410	9780	5317	20402	5653	7904	2870	9276	7027	8130	2952	5459	2421	5575	2422	4921	2400	4532	2281	5847	3645	8214	1953	5940	3489	3620	6156	6624	12486	6375	14349	8634	2134	561
TRIM62	969	664	0	475	390	347	192	651	613	863	562	1263	1586	180	122	1333	1171	208	199	121	158	151	80	266	128	121	0	552	237	130	241	180	100	70	82	528	76	121	444	200	19
ZNF362	768	1024	16	466	151	857	50	753	0	973	361	898	26	356	741	1258	2	184	358	156	100	283	0	348	335	149	4	264	109	174	217	36	76	138	6	225	102	6	304	73	16
A3GALT2	0	0	0	0	0	0	0	0	0	0	0	0	0	0	0	0	0	0	0	2	0	0	0	0	1	0	0	0	0	0	0	0	0	0	0	1	0	0	0	0	0
MIR3605	0	0	0	0	0	0	0	0	0	0	0	0	0	0	0	0	0	1	1	2	0	0	0	0	0	2	0	0	0	0	0	0	1	0	0	0	0	0	0	0	0
HMGB4	0	0	0	0	0	0	0	0	0	0	0	0	0	0	0	0	0	0	0	0	0	0	0	0	0	0	0	0	0	0	0	0	0	0	0	0	0	0	0	0	0
C1orf94	0	0	0	0	0	0	0	0	0	0	0	0	0	0	0	0	0	0	0	0	0	0	0	0	0	0	0	0	9	2	0	0	0	0	0	233	0	0	0	0	0
MIR552	0	0	0	0	0	0	0	0	0	0	0	0	0	0	0	0	0	0	0	0	0	0	0	0	0	0	0	0	0	0	0	0	0	0	0	0	0	0	0	0	0
GJB5	0	0	0	0	0	0	0	0	0	0	0	0	0	0	0	0	0	0	1	0	0	0	0	18	0	0	0	0	0	0	0	0	9	0	8	0	9	2	2	0	0
GJB4	0	0	0	0	0	0	0	0	0	0	0	0	0	0	0	0	0	0	28	0	2	0	0	0	0	0	0	0	0	0	0	0	0	0	0	0	0	0	0	0	0
GJB3	850	0	0	0	0	0	0	0	0	0	0	0	0	0	0	0	0	0	0	0	0	0	0	0	0	0	0	0	0	0	0	0	0	0	0	0	0	0	0	0	0
GJA4	1894	0	0	0	0	0	0	0	0	0	0	0	0	0	0	0	2	0	8	0	2	0	0	0	6	0	0	0	0	6	0	0	0	0	0	0	0	0	0	0	0
SMIM12	7196	4534	6597	2388	6043	2212	3393	3960	6464	3456	6119	4943	6850	2041	2740	3610	3846	1144	1967	1147	1410	963	1321	1171	792	539	1564	731	2771	801	1478	834	1176	2012	1510	1806	2009	1648	1554	710	214
LOC653160	0	78	0	0	269	152	2	193	0	0	385	0	0	647	726	237	0	15	28	77	23	52	27	47	22	18	134	159	28	54	10	26	10	24	8	177	10	6	19	38	0
TMEM35B	7032	3436	3030	3933	2378	1280	2122	3499	2752	1284	4297	4309	1682	2342	5195	2789	562	2577	4190	2882	3300	2152	1679	2082	1603	1688	5216	3763	6120	3044	1218	3289	4576	7165	4496	1658	5029	1755	406	2515	210
ZMYM6	1674	2015	1586	2766	1283	861	244	2559	480	2957	256	2824	226	491	1288	3827	1010	4120	2487	2877	1541	3222	1496	2951	1042	2995	1667	4079	6561	1514	2514	1617	922	1769	1445	766	2445	1464	849	2159	555
ZMYM1	566	874	0	698	134	975	18	388	32	722	133	1469	0	157	218	630	0	1094	181	1165	221	1184	272	898	22	1223	424	1038	444	563	99	423	2	443	114	233	303	174	289	461	72
NCDN	3773	1880	852	809	996	1521	1355	1811	2067	1036	952	2030	1683	363	566	3116	2977	86	230	71	131	47	97	88	166	89	129	202	62	144	241	48	209	196	373	2897	149	221	986	59	16
PSMB2	23017	8865	27765	8596	28315	4641	21337	9661	19257	8086	25468	7049	15306	4438	21039	7806	8233	4535	17806	4570	25737	4440	9738	2878	7064	2797	18229	5710	25522	4426	9991	4165	9669	18022	9963	6932	15031	26060	9163	3400	1715
C1orf216	2912	0	824	388	816	2	317	394	1215	0	2260	0	506	402	3206	486	4	40	332	22	242	12	99	86	189	0	232	116	304	10	740	46	195	662	200	937	424	318	881	40	124
CLSPN	4112	90	2940	382	4480	182	2872	949	6546	125	3751	64	4712	907	3838	188	4238	377	8367	81	4689	231	3761	126	4790	67	5188	91	6362	160	5305	161	4096	4497	8529	2857	3516	8691	4593	95	1354
AGO1	627	2060	426	951	386	1146	294	1317	268	826	440	608	80	636	902	1311	80	2177	1889	1582	1213	1638	558	1506	2301	1342	711	1950	2968	684	1024	1073	763	1339	1429	1224	915	2008	1966	1131	708
TEKT2	118	0	0	0	0	4	52	13	0	0	14	0	0	0	0	0	0	0	84	0	3	18	4	19	192	4	0	0	0	0	52	0	8	0	7	3	2	7	8	0	2
ADPRHL2	7896	6772	3510	3116	3600	3329	3660	5039	5346	3761	4104	5858	2275	3061	2632	4673	3729	394	546	319	330	504	196	312	304	437	756	240	958	458	382	749	362	448	983	2844	361	871	750	220	152
TRAPPC3	10771	6251	6167	4335	6703	5165	4348	7001	5583	6598	9315	6761	6700	3211	4556	6850	4922	1473	1894	1091	1853	1134	996	1577	1391	927	2030	1251	2660	776	1767	619	1239	1405	1343	3141	1675	1916	1986	1195	226
MAP7D1	5005	2914	1649	1996	2345	2696	2049	2936	3063	4215	3912	3267	913	2025	4027	4107	867	184	326	125	281	116	197	249	162	88	160	273	396	235	282	242	324	408	254	4995	309	457	3289	216	160
SH3D21	564	52	0	8	22	0	0	170	0	413	0	84	288	114	0	66	0	16	11	24	14	6	24	16	102	2	0	2	36	18	9	0	0	44	0	19	6	0	57	12	7
EVA1B	1874	2	0	10	0	8	16	10	34	113	86	12	0	0	0	86	156	2	7	0	2	0	0	2	8	2	0	4	6	0	4	0	2	8	0	15	0	0	10	0	0
LSM10	3567	13039	6605	11949	6123	9389	4443	11338	4330	7771	3000	10388	5858	7983	3322	15753	2278	3081	1553	4767	1988	2929	660	3319	1077	3071	2292	3278	1709	4239	1347	6466	1223	1853	1812	1552	2482	2197	751	2290	94
OSCP1	471	0	84	1	204	0	346	32	192	127	1052	0	1180	0	466	0	230	38	721	37	416	4	97	17	316	30	574	40	1402	8	300	49	189	127	81	84	246	55	38	11	76
MRPS15	6923	2622	14743	4340	8509	3889	6778	5004	8909	3902	6671	3528	9544	2740	7628	3498	4333	1045	2996	872	3285	699	2072	1382	2177	1084	3578	952	2213	661	3123	733	2049	2553	2967	3676	3063	4002	2147	737	402
CSF3R	93	0	0	48	0	2	39	0	0	16	0	0	0	0	0	0	0	0	4	2	1	4	0	10	0	13	0	0	169	1	1	0	4	0	2	0	0	0	0	0	0
MIR4255	0	0	0	0	0	0	0	0	0	0	0	0	0	0	0	0	0	0	0	0	0	0	0	0	0	0	0	0	0	0	0	0	0	0	0	0	0	0	0	0	0
LINC01137	203	148	0	214	332	10	0	262	456	28	202	248	1054	262	0	131	0	19	158	64	161	47	36	67	46	144	80	38	324	50	82	72	95	368	121	217	426	87	70	64	12
ZC3H12A	10291	3743	556	4049	2177	9524	3533	7467	2450	10159	2073	8398	2929	8231	2908	7696	1207	185	174	203	72	132	22	418	81	406	78	112	38	181	72	148	62	42	76	1206	178	54	346	136	20
MIR6732	2	0	0	2	4	0	0	0	8	2	0	4	0	0	0	1	0	0	0	0	0	0	0	2	0	0	0	0	0	0	0	0	0	0	0	0	0	0	0	0	0
MEAF6	10544	8901	3836	8114	4905	5525	3887	6850	4795	8887	5678	9391	2724	3585	5470	8142	1538	6079	5925	5116	3943	5036	2148	4402	3459	3896	2898	4068	10127	3458	1780	4555	3077	5089	4997	2967	3418	4140	1579	3396	750
MIR5581	0	0	0	0	0	0	0	1	0	0	0	0	0	0	0	0	0	2	4	1	4	5	3	3	3	13	0	8	28	0	3	0	3	10	4	0	4	3	1	8	0
DNALI1	0	2	1	0	0	0	51	0	60	0	1	0	0	0	0	1	0	14	0	16	6	0	0	25	0	0	136	0	0	4	0	0	0	11	0	0	12	3	5	0	2
GNL2	9673	8523	7529	5952	7855	3533	12079	5789	12828	6577	14068	6777	3709	3163	9476	6812	9055	4860	10105	3720	10486	4312	6234	3416	6225	1658	5785	7142	16715	2152	6619	3209	4622	6833	13267	6164	11511	17658	4468	2789	1225
RSPO1	0	0	0	0	0	0	0	0	0	0	0	0	0	0	0	0	0	6	2	0	0	0	0	2	0	3	0	0	0	0	3	2	2	2	0	0	0	0	0	0	0
C1orf109	1190	2498	803	2271	1989	831	2254	1270	1984	1394	1251	3368	1996	436	1276	2763	836	868	1280	1136	1279	1500	838	1076	982	873	1384	640	1786	791	1249	1060	768	2344	2031	1047	2502	3180	1224	699	343
CDCA8	8610	317	5481	162	4131	360	9233	1274	8758	446	4942	243	2434	942	7178	563	5385	320	5279	173	2645	371	2711	43	3237	41	932	50	4338	36	2584	147	2166	5269	6692	4335	5597	10267	5203	108	752
EPHA10	71	0	199	0	166	0	526	0	510	0	196	0	0	373	545	0	118	4	75	0	84	4	68	4	32	0	76	2	175	4	132	0	96	205	0	0	19	23	248	0	10
MANEAL	134	68	1746	123	1700	254	1095	444	1644	747	1061	108	8	0	1138	80	1588	56	559	37	323	37	482	99	388	2	260	62	336	82	371	20	470	570	513	3450	777	576	1411	53	153
C1orf122	5004	1334	4212	2105	3565	2293	3178	2340	4844	2770	5280	2246	5658	1968	2778	2298	3202	93	157	26	97	40	191	90	146	115	349	274	276	148	226	42	284	440	261	1788	217	268	825	40	31
MTF1	936	2430	320	1732	1434	1493	1799	2958	1987	3270	1944	2692	2276	2285	1226	4028	2015	2964	2162	2413	1232	1880	727	1980	1449	1878	1656	2782	5713	1331	1680	914	1205	3092	1794	1005	1040	3967	1427	1783	333
SF3A3	14280	9308	8227	7317	10831	4090	10397	7969	11262	6056	13306	9369	6398	4785	9535	8219	5120	6351	11677	5206	10129	5068	4111	3960	5624	3298	4851	3883	9619	3006	7811	4875	3416	6613	12049	9128	9486	14510	5310	3758	1466
FHL3	1972	0	0	38	38	210	485	442	568	150	439	239	0	252	0	64	0	14	91	22	76	10	0	8	114	0	0	102	162	0	408	8	162	80	16	405	0	4	15	0	126
UTP11	5529	2331	3152	1476	4887	1153	4993	1523	6829	1181	6152	1334	5678	1773	3654	1050	2373	1300	6813	1170	6173	1357	2652	1040	2965	988	6509	1852	4917	1319	4706	1822	3088	6711	8829	3990	5695	7323	1847	672	616
POU3F1	7044	36	0	138	146	116	580	12	428	144	3674	424	1734	382	398	152	460	29	160	12	50	14	4	15	357	2	2	2	0	6	28	4	8	84	152	1006	259	2	26	2	112
MIR3659	0	0	0	0	0	0	0	0	0	0	0	0	0	0	0	0	0	0	0	0	0	0	0	0	0	0	0	0	0	0	0	0	0	0	0	0	0	0	0	0	0
LINC01343	0	0	0	0	0	0	0	0	0	0	0	0	0	0	0	0	0	0	0	0	0	0	0	0	2	0	0	0	0	0	0	0	0	0	0	2	0	0	0	0	0
MYCBP	27	23	48	7	38	3	26	11	32	23	18	9	30	11	26	15	6	45	88	58	154	39	58	21	61	7	118	21	20	140	71	28	62	170	122	72	133	87	44	39	6
GJA9-MYCBP	40	15	0	19	3	23	0	70	0	0	0	0	0	64	0	0	0	3	1	4	0	10	9	14	9	74	4	72	28	0	5	2	8	4	0	0	4	0	4	8	6
LOC105378663	2	0	0	0	5	0	0	0	0	0	1	0	0	0	0	0	0	0	0	0	2	0	1	1	0	4	0	3	10	0	2	0	0	0	2	0	3	2	1	0	0
GJA9	0	0	0	0	0	0	0	0	0	0	0	0	0	0	0	0	0	0	0	0	0	0	0	0	0	0	0	0	0	0	0	0	0	0	0	0	0	0	0	0	0
RHBDL2	207	0	60	33	7	31	16	31	16	5	0	0	0	41	0	6	0	0	79	2	29	18	17	24	43	9	1	12	150	5	24	8	34	13	16	75	1	4	0	5	14
AKIRIN1	9474	5862	2590	4124	7114	4199	8967	6728	10471	12573	7485	4918	1696	2546	8732	6363	3579	1630	2407	834	1969	1029	1462	1186	1961	1197	1953	1591	6555	822	3133	2094	1660	1598	757	3262	1684	2030	3946	992	684
NDUFS5	17952	5292	28173	6834	29602	5974	30692	7204	21311	7583	28827	6546	28423	4738	14030	5901	9650	2448	12916	3199	18046	1881	6293	3084	13337	3626	17047	3785	17267	5620	7414	3455	13461	12688	14818	6792	12618	15544	3261	2287	1354
KIAA0754	6	46	0	154	0	64	0	100	0	84	0	194	0	74	124	20	8	716	161	177	34	408	56	312	92	430	12	957	358	186	146	110	116	266	60	10	82	18	4	199	122
OXCT2P1	0	52	0	0	0	0	0	20	0	6	18	30	0	26	0	16	12	0	2	0	0	2	0	0	0	0	0	0	0	0	2	0	2	0	2	6	0	0	2	1	4
PPIEL	821	153	33	590	54	237	163	72	7	78	39	412	0	47	1	171	0	408	391	218	24	490	120	215	102	238	409	883	812	114	49	160	89	242	21	21	20	39	21	305	15
PABPC4	1501	1231	2888	2915	6578	2608	2876	2262	1795	2252	1815	2535	1386	2638	1479	1899	1143	2005	3316	1316	3600	1465	1678	2704	1998	1621	3709	2680	5157	1394	3121	2050	2071	2783	3350	12986	3404	4883	7132	1731	3319
LOC101929516	0	0	0	0	10	4	20	0	26	0	0	0	0	0	22	0	0	14	14	10	21	10	3	5	10	35	0	30	15	1	20	3	7	0	0	0	1	7	4	27	28
SNORA55	0	10	0	0	0	0	0	0	0	0	0	0	0	0	1	0	0	16	14	3	13	13	0	12	8	0	28	0	13	0	10	2	0	0	8	5	6	2	7	12	1
HEYL	184	0	0	0	0	0	0	0	0	0	0	0	0	0	0	0	0	0	0	0	7	0	2	0	0	0	0	0	116	0	0	0	58	0	20	102	0	0	0	0	0
NT5C1A	0	0	0	0	0	0	0	0	0	0	0	0	0	0	0	63	0	0	0	0	0	0	0	0	0	0	0	0	0	0	0	0	0	0	0	0	0	0	0	0	0
HPCAL4	0	0	0	0	0	0	0	0	26	0	0	0	0	0	0	0	0	1	82	0	32	2	175	3	11	3	0	3	1	4	16	2	86	4	0	0	34	0	0	0	0
PPIE	7672	7567	7136	5210	4573	3713	4508	8328	6459	4349	4898	9169	3560	2933	5197	6287	4662	2946	3796	2649	3647	2148	1403	2665	2469	2789	4162	3869	5543	2332	2357	2939	342	3458	2123	1224	1592	2518	1079	2395	1208
OXCT2	0	12	0	0	0	2	0	2	0	66	114	10	0	68	0	0	162	2	2	0	8	0	0	0	0	21	4	0	12	0	8	0	2	0	6	54	0	0	7	14	0
LOC101929536	0	0	108	78	0	0	58	88	58	100	86	0	1392	4	0	182	257	2	4	0	8	0	0	0	12	0	0	0	0	0	8	0	12	4	8	53	0	6	4	0	0
TRIT1	1518	1074	3281	697	2519	410	948	1691	1666	837	3756	1781	1336	57	3138	1145	2378	898	1956	732	1606	542	1199	888	1560	483	2584	1150	3464	404	1594	343	536	2178	1864	1207	2710	3022	1156	795	489
MYCL	77	0	0	0	116	0	1034	2	458	0	2730	0	222	0	2282	0	252	2	540	2	478	2	820	0	263	2	200	0	1991	0	863	0	10	60	28	64	761	391	1480	0	78
MFSD2A	2010	110	191	34	210	475	6798	1192	4326	842	9123	279	1178	689	4857	392	3774	79	709	30	511	39	289	51	2118	26	873	46	2095	51	759	42	70	64	324	1006	589	949	1524	37	77
CAP1	46830	66540	11442	38308	14130	28110	14061	54886	30758	36805	27629	60505	10890	16741	29325	51522	8239	29921	26559	26934	14482	22959	8107	18342	11744	14133	5962	18054	44584	11896	15259	14825	8652	21578	15534	13406	9517	26411	15125	19257	5519
PPT1	25987	12453	13778	11109	15360	6143	9992	11116	19806	9529	28271	11465	2686	6916	20424	10126	9026	9882	14780	6170	13147	8244	7633	7501	9189	4527	9780	9396	28949	3908	17917	6909	6353	34389	23930	12799	10551	29422	4745	6022	2376
TMCO2	0	0	0	0	0	0	0	0	123	0	0	0	0	0	0	0	0	3	103	2	20	0	2	14	2	0	12	0	30	0	10	4	44	0	0	0	0	5	0	1	0
ZMPSTE24	6476	2316	5914	1533	8237	400	4145	1512	13908	2698	6446	1391	1894	289	5626	951	1312	2867	35139	2360	10559	3207	11381	1062	5998	1482	8862	3088	30831	1158	14950	1802	11617	9804	11036	3379	9051	17931	3666	1495	1800
COL9A2	18459	1271	906	1632	3871	2823	7663	2013	39840	3370	23353	4157	11889	16728	95619	6320	14070	123	792	48	109	37	714	253	31	35	216	230	1935	125	874	18	1476	1006	201	1995	267	1520	8445	59	25
SMAP2	23896	49652	6692	32712	10821	27559	8046	42706	21065	58703	16475	34862	13372	26911	16765	50877	4075	14430	8973	6192	4053	5106	3867	6381	3108	3776	1180	8273	13945	6082	4156	6634	6243	5571	1520	9461	997	3002	9293	5558	2338
ZFP69B	78	162	8	190	0	251	326	305	127	194	224	0	0	0	378	0	0	116	45	40	85	29	11	92	171	30	0	317	228	16	151	0	65	342	55	54	149	374	139	96	10
ZFP69	394	228	187	464	0	243	780	835	27	333	1247	567	0	753	773	836	0	230	44	172	64	150	42	175	86	249	0	61	625	108	341	84	279	253	37	275	184	99	243	142	40
EXO5	1274	948	10	603	0	469	273	902	0	290	566	856	0	0	958	1882	0	454	179	324	143	337	58	366	700	122	4	480	1144	128	403	476	94	273	798	849	105	1507	645	124	209
ZNF684	281	330	36	263	369	398	122	497	224	225	360	114	320	0	905	529	217	450	37	300	319	363	107	250	224	313	0	202	685	215	182	374	307	659	878	286	359	347	130	234	92
RIMS3	376	197	0	38	751	132	369	182	1186	185	0	46	278	0	714	122	688	79	331	42	118	2	178	23	96	0	8	2	150	26	167	0	216	470	44	162	68	211	590	2	44
NFYC	4311	10366	1675	6497	1542	5518	2779	7651	4653	7110	3160	9150	3336	4615	4708	7801	2263	2017	1538	2282	1982	2057	823	2266	1586	1612	1403	2484	3485	1479	1425	2591	1218	2398	1634	3299	1416	3734	2094	982	191
MIR30E	0	0	0	0	0	0	0	0	0	0	0	0	0	0	0	0	0	5	0	3	4	3	0	3	3	2	0	10	0	0	0	0	0	0	4	0	0	0	0	0	0
MIR30C1	0	0	0	0	0	0	0	0	0	0	0	0	0	0	0	0	0	9	0	1	0	2	0	0	0	0	0	13	0	9	0	0	0	0	0	1	0	0	0	0	0
CITED4	11898	258	0	530	62	1334	0	868	96	2042	0	321	0	646	0	512	2	8	4	0	0	6	0	6	0	8	0	12	0	32	2	16	0	0	0	0	0	0	0	0	0
CTPS1	3967	2141	4992	2316	8130	839	5129	1590	5945	1913	5408	2110	5553	1404	4513	2016	2601	1365	3336	636	3587	773	2274	1247	4957	776	2218	1242	5992	463	4585	887	2173	5119	5495	4145	5679	11495	3694	559	1219
SLFNL1-AS1	141	4	1	0	47	6	0	0	49	0	0	35	0	0	0	26	0	72	31	12	34	42	14	36	30	17	24	45	14	24	34	12	23	23	51	116	25	25	27	33	0
SLFNL1	0	0	0	0	0	0	0	0	0	0	0	0	0	0	0	5	0	0	1	2	0	3	0	0	4	0	0	0	0	0	3	0	0	0	0	30	2	0	8	0	0
FOXO6	40	42	0	58	0	19	0	16	0	28	0	0	0	0	0	6	2	0	0	0	2	0	0	0	14	0	0	0	2	0	2	0	0	4	8	793	0	0	0	0	0
LOC101929901	24	0	0	0	0	0	0	0	0	0	0	0	0	0	0	0	0	0	4	8	0	0	0	0	5	14	0	0	0	0	0	0	0	1	6	4	0	0	0	5	0
EDN2	0	0	0	0	2966	4	2361	0	0	0	161	0	0	248	3152	0	942	0	87	0	110	2	75	0	66	0	40	0	224	0	31	0	13	61	268	876	5	34	43	0	28
GUCA2B	35	0	0	0	0	0	0	0	0	0	0	0	0	0	0	0	0	0	0	0	0	0	0	0	0	0	0	0	0	0	0	0	0	0	0	0	0	0	0	0	0
GUCA2A	0	0	0	0	0	0	0	0	0	0	0	0	0	0	0	0	0	0	0	1	0	0	0	1	11	0	0	0	0	10	0	0	0	0	0	0	0	0	0	0	0
ZMYND12	35	50	0	93	0	195	28	85	40	176	8	2	0	65	0	99	0	46	13	68	36	48	19	55	12	74	0	73	205	74	17	32	51	113	0	0	52	71	20	55	26
PPCS	7259	11075	4709	9960	4415	7379	3807	10311	4400	8157	6668	11226	2310	9736	6518	10303	2074	3931	2560	4057	3477	4902	1097	5513	2875	3149	2425	4630	9217	3952	2171	5705	3303	3893	1264	858	2154	2788	1377	3024	520
CCDC30	44	100	97	178	70	216	0	110	7	0	0	110	0	90	0	189	0	171	87	97	24	87	12	184	30	9	0	687	221	20	82	125	29	143	9	13	22	26	13	87	23
PPIH	2521	2669	5813	2299	4434	1608	3572	3236	3430	2131	4545	3724	1729	2876	6125	3085	2259	990	1623	749	1787	521	1076	774	856	869	1647	1533	2696	1010	1021	818	1285	1677	2416	3287	1663	3849	1609	503	208
YBX1	5191	3869	8362	8183	15417	5017	6971	5478	6743	6669	7032	4701	5644	3528	3464	4132	3702	4550	6550	3518	6316	3528	5079	5269	5702	6917	15065	4792	8363	3972	7813	6442	5782	6855	13162	24298	8212	16398	17885	3359	5050
CLDN19	1410	0	0	0	0	0	0	0	0	0	0	0	0	0	0	5	0	2	0	0	0	2	0	0	6	0	0	4	0	0	14	0	2	0	0	0	16	2	2	0	0
P3H1	5919	3813	1027	3322	2626	2866	2177	3869	4118	1768	3652	6903	2355	4903	5318	7142	3643	248	197	202	157	224	94	294	402	475	277	910	1056	303	380	242	250	284	283	3477	254	310	894	134	111
C1orf50	2560	1618	1938	1749	2034	778	1956	2542	1965	2482	3683	2416	5328	1431	1772	2378	344	258	396	217	318	131	148	333	218	92	158	130	744	393	366	160	469	497	262	408	174	265	183	186	44
LOC105378683	0	2	0	4	0	0	0	10	0	0	0	6	0	0	14	0	0	10	17	4	0	6	4	6	0	11	0	11	1	0	6	0	4	13	0	1	5	1	6	3	0
SVBP	1409	1598	2408	1850	1926	1035	1778	2053	1497	1857	1240	2604	1323	1596	1565	1692	537	421	914	663	667	585	325	711	838	641	738	1004	3172	594	542	520	1361	945	560	613	363	450	289	635	95
ERMAP	90	533	522	657	439	77	279	416	287	539	946	529	1558	129	148	349	187	434	682	166	424	297	247	162	175	122	586	300	1824	247	279	155	156	556	495	377	200	536	280	305	20
ZNF691	1064	2781	4667	1482	2584	766	2237	1215	1365	142	2241	1320	2302	626	1115	1565	1963	662	1509	937	927	720	1089	713	1273	470	1045	1156	6905	704	1447	572	1096	2522	1589	1144	1097	1142	368	467	392
LOC339539	54	128	0	37	0	80	6	134	2	176	32	126	2	110	14	113	4	2	0	0	0	12	0	6	1	6	0	5	4	0	5	4	0	2	1	2	1	0	0	2	0
SLC2A1	4918	6156	2948	3485	2841	6490	7760	6832	4863	13790	12798	4839	4504	5895	12529	7745	3129	2156	3474	1187	1554	1219	1011	1225	985	1577	1033	2089	2407	1347	1478	1116	427	1540	372	1254	1314	1229	2021	1128	562
SLC2A1-AS1	234	305	0	173	0	352	0	141	70	90	60	709	0	113	276	424	0	126	111	26	8	119	31	365	46	33	2	377	219	26	8	15	6	25	13	2	5	19	11	46	0
FAM183A	0	0	0	0	0	0	8	0	0	0	0	0	0	0	0	0	0	2	0	0	0	0	0	0	0	0	0	0	0	0	0	0	0	0	2	15	0	0	0	0	0
EBNA1BP2	12327	5501	28394	6418	20287	3993	15928	6952	20461	4363	29089	5725	20758	4217	11010	4468	8310	1518	5346	1463	9970	1395	2826	1590	4418	863	4601	1961	3769	1128	3868	1565	3909	3913	10462	10581	6529	18748	5629	1026	1165
MIR6733	0	4	24	4	11	0	1	22	10	19	15	13	0	46	9	9	0	10	3	5	7	0	2	0	2	1	5	0	0	0	0	1	1	1	3	3	7	3	2	2	0
TMEM125	0	0	0	0	0	0	0	0	0	0	0	0	0	0	0	0	0	0	0	0	0	10	0	0	0	0	0	0	0	0	0	0	0	0	0	0	0	0	0	0	0
C1orf210	0	0	0	0	0	0	0	0	0	0	0	0	0	0	0	0	0	0	0	0	0	0	0	0	0	0	0	0	0	0	0	0	0	0	0	0	0	0	0	0	0
MPL	6	0	0	10	0	0	0	41	3	15	152	18	0	0	0	0	2	16	38	6	0	16	0	22	15	0	0	24	0	0	459	0	9	85	10	9	20	44	3	2	2
CDC20	12971	305	17797	85	9051	630	12230	3264	19165	2	18681	74	9272	1116	9313	476	5362	151	1906	7	1573	167	1129	75	2275	4	1851	80	1491	35	1882	27	1289	2138	5772	8089	3298	8844	5140	4	526
ELOVL1	8792	5307	3392	4435	5382	3335	4687	5182	10721	3660	10397	4854	4647	5257	9774	5860	2742	1853	3986	1092	2432	1379	1366	1246	3579	774	2057	1122	6496	1536	1910	1698	1892	1579	1806	5161	1230	2397	3516	1537	360
MIR6734	0	6	2	0	0	4	0	0	0	0	0	4	0	0	0	0	0	0	0	0	0	0	0	0	0	0	0	0	1	0	0	0	0	0	0	1	0	0	0	0	0
MED8	4794	5087	6628	2693	3827	2158	5462	4100	4626	1975	5224	4719	3695	1836	4512	4568	3456	1199	3308	1004	3498	920	1369	921	1665	350	1425	1213	3756	1003	1436	1254	1562	2654	2758	1890	1900	2737	889	1115	431
MIR6735	0	0	0	0	0	0	0	0	0	0	0	0	0	0	0	0	0	0	0	0	0	0	0	0	0	0	0	0	1	0	0	0	0	0	0	0	0	0	0	0	0
HYI	0	0	0	0	0	0	0	0	0	0	0	0	0	0	0	0	0	0	0	0	0	0	0	0	0	0	0	0	0	0	0	0	0	0	0	0	0	0	0	0	0
KDM4A	193	760	8	437	270	758	236	382	424	146	288	591	111	208	63	587	0	1661	1743	1566	1057	1194	830	1153	1266	619	404	1460	2165	645	1048	163	444	684	891	1626	812	1168	1582	1049	374
LOC101929592	94	0	0	20	0	9	13	0	34	76	0	0	0	91	0	0	0	8	12	10	5	16	1	28	5	16	0	27	2	5	9	2	4	13	4	2	0	9	1	12	0
MIR6079	0	11	0	4	0	0	0	4	0	0	0	0	0	0	0	0	0	2	0	5	0	3	0	0	2	0	0	0	0	0	0	0	0	0	0	0	0	0	0	0	0
ARTN	32	0	0	0	0	0	0	0	0	0	0	0	0	0	0	0	0	0	8	0	0	0	0	2	0	0	0	0	0	0	2	0	4	4	6	22	16	6	9	0	0
DPH2	5571	6533	8403	3642	3565	2730	7482	8481	6945	3984	11577	6722	5414	4453	8364	8098	6102	887	1040	715	1499	699	715	893	793	616	572	1416	1541	445	1055	513	567	610	2318	5895	958	1925	1788	666	162
ATP6V0B	22434	14899	35220	15584	20303	8796	10472	14980	13125	17426	21187	16826	13195	15438	17327	13371	7178	3850	5652	2441	4853	2936	3116	3895	3538	3048	3982	5147	11672	3055	3145	4985	2273	7761	6177	5981	4041	7343	1375	2289	440
B4GALT2	990	387	950	60	717	140	243	173	977	156	834	386	628	179	914	68	97	4	73	0	69	4	0	14	119	34	0	8	118	10	171	0	172	229	401	3825	247	245	767	9	2
CCDC24	1414	350	480	259	339	247	255	637	940	511	1281	773	301	337	936	545	564	86	140	47	92	42	75	162	41	18	266	52	98	103	140	22	56	180	84	208	161	47	114	38	4
SLC6A9	174	0	16	0	352	0	170	57	108	0	0	0	0	8	138	22	0	8	0	0	2	7	1	27	16	0	0	0	0	6	12	4	71	0	0	0	0	0	1	4	0
KLF17	0	0	0	0	0	0	0	0	0	0	0	0	0	0	0	0	0	0	0	2	0	0	0	0	0	0	0	0	0	0	0	0	0	0	0	0	0	0	0	0	0
DMAP1	8934	4186	2679	4042	4120	4313	3251	4768	2661	4324	6592	5700	4840	4141	4594	5625	4155	914	1236	704	782	801	484	1678	780	1062	639	1580	1733	813	1351	1368	883	561	960	1642	554	1076	879	570	18
SNORA110	0	0	0	0	0	0	0	0	0	0	0	0	0	0	0	0	0	0	0	0	1	0	0	3	0	0	0	0	0	0	2	0	0	0	0	0	0	0	0	0	0
MIR5584	0	0	0	0	0	0	0	0	0	0	0	0	0	0	0	0	0	0	0	0	0	0	0	0	0	0	0	0	0	0	0	0	0	0	0	0	0	0	0	0	0
TMEM53	766	364	0	291	168	62	230	554	796	766	192	471	0	270	62	526	336	130	210	223	157	114	94	62	128	180	308	49	238	139	71	240	103	297	71	57	55	76	40	184	24
C1orf228	6751	8844	581	7805	55	10858	183	9337	69	7154	576	5554	350	10088	0	14767	8	233	147	336	15	303	14	157	53	398	1	535	96	379	4	182	46	43	5	4	2	14	2	285	2
RNU5F-1	1489	728	101	4703	921	6507	4373	4916	2582	3882	2991	1158	356	1892	462	3754	629	189	85	48	115	46	27	1197	37	1592	1134	338	139	517	223	15	270	5	6	0	18	19	1	196	8
RNU5D-1	302	151	10	1434	884	2430	3688	1971	972	1612	1002	449	363	361	388	1161	535	63	90	21	233	26	22	750	42	1093	1209	148	87	149	344	9	84	34	19	6	12	27	22	304	10
RPS8	14690	33859	61632	47876	54720	37511	39207	41407	44258	41198	44435	48491	56194	27587	22739	35517	24219	41966	39391	47360	74192	42829	29366	58146	40377	53594	67921	51026	58976	59824	45006	43611	31852	34392	35770	71070	28227	48268	26869	35557	9527
SNORD55	74	117	267	79	46	154	90	81	109	181	127	92	246	215	92	101	0	2	2	4	5	2	1	2	2	20	23	8	0	1	0	0	0	0	0	11	5	6	6	1	0
SNORD46	44	153	60	2	23	81	82	96	57	65	10	46	0	120	18	90	72	24	17	5	19	9	10	62	40	29	16	22	34	21	35	5	15	1	10	5	2	7	5	15	11
SNORD38A	51	98	108	68	17	129	88	67	16	134	109	95	96	413	73	73	32	63	46	73	38	40	16	29	7	34	42	102	80	33	43	36	27	10	21	42	7	39	10	63	16
SNORD38B	8	77	99	52	6	19	6	58	25	38	7	60	315	37	25	59	0	28	52	38	30	36	34	38	19	48	33	112	55	44	49	44	41	11	35	27	37	89	6	37	4
BEST4	35	74	205	4	122	162	26	50	305	66	292	34	0	0	0	25	0	37	21	10	9	24	3	48	36	10	27	0	71	37	73	14	118	16	4	0	32	5	0	23	0
PLK3	2717	1973	663	1170	1564	4398	2766	3732	2979	3949	2556	6073	1759	2398	2336	3084	281	277	340	344	176	128	67	252	117	290	65	241	225	213	235	329	82	294	90	583	45	90	49	263	4
TCTEX1D4	247	86	0	1	91	0	152	8	75	77	149	0	0	127	0	0	0	0	4	0	5	7	0	6	0	0	0	0	0	16	1	0	0	0	0	2	0	0	0	3	0
BTBD19	195	37	0	64	74	99	90	80	31	129	12	163	0	139	0	108	115	21	27	11	13	4	13	33	31	74	0	0	6	2	28	2	7	10	0	9	0	4	0	22	0
PTCH2	617	204	134	1005	435	1010	101	702	807	362	977	434	386	507	364	605	1110	124	106	95	337	96	19	902	174	1045	3311	1039	358	259	826	17	347	81	53	190	5	29	27	211	6
HECTD3	4191	4387	1998	2670	2220	3283	2419	4637	2844	2454	3384	4988	62	4358	3145	7223	1322	666	959	415	512	452	222	574	248	353	376	752	1564	419	274	510	568	415	394	1990	333	427	1445	597	594
UROD	12673	7045	20162	5405	12156	5741	6057	6412	9449	4362	11823	7566	8349	5310	9560	7941	5616	2530	7713	2996	8518	2329	3327	2614	2379	2462	2889	3049	3535	1674	2008	2408	1177	3312	6290	3551	1682	5684	1297	2563	358
LINC01144	0	329	0	241	154	42	329	254	218	110	654	327	0	10	354	128	524	24	48	13	54	10	20	80	20	36	187	0	38	6	89	2	16	17	6	27	16	16	42	8	0
HPDL	224	5	1268	141	12	266	88	229	100	146	692	16	1320	0	0	76	0	2	0	6	0	6	2	8	4	19	0	0	0	0	0	0	10	2	334	2678	1	4	33	8	2
MUTYH	5543	3031	2947	2443	2019	3051	2048	5848	2533	4160	6290	4532	4921	5570	4524	4857	3240	327	452	382	329	270	183	822	250	413	345	824	506	335	460	152	181	300	726	2212	426	614	942	267	77
TOE1	1755	1461	5487	1153	2260	2578	2914	2898	2573	8230	3253	2715	2716	2674	2641	2332	3404	1278	1594	1126	2096	481	1456	926	1290	827	1768	615	2775	361	1442	913	1062	1268	1410	1523	661	2757	881	802	663
CCDC163	238	602	0	400	374	110	210	240	1013	658	206	718	0	104	742	176	712	157	181	100	118	61	78	62	47	4	132	378	192	14	67	496	224	295	180	109	176	126	81	16	0
MMACHC	8	5	0	20	56	79	296	77	2	0	90	196	4	0	286	32	94	135	164	43	186	64	182	73	60	140	8	222	272	85	59	3	52	126	263	327	356	375	198	64	44
PRDX1	30772	22781	51055	22787	61299	12974	57360	21417	53500	10820	30677	19505	22607	9839	35439	16239	30784	7505	27805	9769	35429	7768	9575	5734	11822	6859	36276	12311	36779	7547	18710	7989	12796	25763	73819	74521	33644	49075	3515	5799	3904
AKR1A1	11149	12584	10881	14408	8499	9073	11110	11840	16434	12778	16210	16938	10577	12100	19269	14810	11799	4678	7931	5577	21338	5271	2665	5218	6564	4779	15420	9752	22639	3504	8466	5074	4399	5407	9129	6522	3365	7353	1732	4067	1914
NASP	12057	8377	12034	7261	11478	5150	12233	11008	8522	6522	11361	8503	14462	6099	11298	8582	6801	5570	10253	3636	8570	3039	6392	3405	7084	3107	7453	5793	5673	2665	6756	3063	4730	5201	11151	14244	5731	9430	6353	2997	1599
CCDC17	0	27	62	81	10	0	15	80	0	77	0	98	0	144	0	50	115	72	135	31	30	40	5	144	55	143	70	181	5	61	11	4	17	19	18	57	2	85	28	58	10
RPS15AP10	0	50	0	77	87	96	12	150	0	200	0	169	2	251	150	39	6	297	165	232	57	246	50	261	88	190	369	246	666	73	155	139	66	188	34	6	46	128	4	179	60
TMEM69	3818	5169	3750	4103	6988	1737	4998	3400	2770	1193	4034	3280	1104	969	3870	4222	2522	1691	3050	2319	1829	1731	2903	1046	1883	1619	2490	2230	8736	1396	3795	1526	1992	3602	4815	2397	2735	4757	1208	1478	321
IPP	1109	1269	510	1281	529	719	1213	1124	782	868	967	769	0	560	525	1358	498	750	735	516	388	581	514	562	799	464	528	597	3089	348	400	216	210	514	676	306	534	406	498	632	133
LOC101929626	70	0	34	0	0	0	4	0	10	0	0	0	0	0	13	0	0	0	10	0	1	0	2	0	1	3	0	0	0	0	9	0	4	2	4	0	17	3	4	0	0
TSPAN1	0	0	0	0	0	0	0	0	0	0	104	0	0	0	0	2	0	2	2	2	8	0	1	15	3	0	0	0	231	0	6	0	0	0	1	6	0	2	0	4	0
LURAP1	45	0	0	0	0	0	21	0	10	0	0	0	0	0	0	0	0	0	0	0	4	0	0	1	0	0	42	0	354	0	10	0	0	0	4	5	0	0	0	0	0
RAD54L	1642	103	3678	94	1516	190	2525	701	2008	226	3107	183	1247	29	2109	398	1540	136	2276	92	336	114	1157	78	1709	169	1058	72	1361	59	1606	18	491	1362	2273	1671	1589	2925	1845	48	191
LRRC41	8106	8142	3459	2168	3995	2285	3191	5148	3866	3410	2785	4765	4049	2837	6058	6722	1413	688	878	533	613	536	472	395	861	438	811	350	1384	357	1362	493	719	862	1110	5014	870	863	1931	377	411
UQCRH	7612	4746	18446	5459	15676	4401	11114	6225	7073	4762	10687	5622	8946	4774	10040	4809	5836	4277	6315	5569	5641	4228	4451	5426	4380	5010	9749	5635	8107	6221	4003	4009	7711	8279	26512	20407	11037	14237	3628	3942	638
NSUN4	1286	1991	2556	2722	3556	2672	2049	2948	1833	3456	2883	4738	2271	3899	3862	4645	2428	3511	2037	2824	1519	3961	1269	2367	1425	2508	1186	3029	5875	1327	2540	2659	1149	2304	3761	2828	2079	1990	1351	2501	336
FAAH	245	544	0	210	70	46	140	370	159	118	273	189	0	243	201	733	2	60	22	19	14	40	11	61	49	20	0	131	117	39	33	9	73	124	85	408	20	22	11	28	0
FAAHP1	46	0	0	0	242	0	0	0	6	0	0	0	0	0	0	0	0	0	54	0	4	0	4	0	16	0	19	14	8	0	53	0	2	95	5	4	22	0	2	0	0
LINC01398	0	0	0	0	0	0	0	0	0	0	0	0	0	0	0	0	0	0	4	0	0	0	0	0	0	0	0	0	0	0	5	0	0	0	0	0	0	0	0	0	0
DMBX1	0	0	0	0	0	0	0	0	0	0	0	0	0	0	0	0	0	0	16	2	0	2	0	0	0	0	0	0	4	0	0	0	66	29	0	0	12	0	0	0	14
MKNK1-AS1	0	5	0	4	0	0	68	26	0	17	69	0	0	0	0	29	0	128	31	41	1	32	5	43	0	152	1	30	185	20	3	0	19	23	4	3	3	47	3	81	0
KNCN	0	0	0	0	0	0	0	0	0	0	0	0	0	0	0	0	0	0	0	0	0	0	0	0	0	0	136	2	0	0	0	0	0	0	0	0	0	0	0	0	0
MOB3C	2656	7446	4	4281	170	5009	440	8148	179	1576	284	11005	0	4677	11	11363	0	2676	149	1135	66	794	59	956	24	706	4	332	459	915	161	2240	286	404	29	293	136	28	259	317	122
ATPAF1	7538	5289	4761	3906	3881	5126	2937	5594	2712	4473	5656	7564	2226	4419	5371	5535	1360	444	515	219	226	194	125	453	365	243	213	485	962	333	381	569	956	892	73	93	72	109	342	320	232
TEX38	0	10	0	13	0	0	0	0	0	3	0	0	0	0	0	40	0	37	20	6	5	30	12	55	0	4	0	0	64	0	4	0	0	4	5	0	12	9	0	5	0
EFCAB14-AS1	0	34	46	24	10	0	0	0	0	0	0	43	0	27	32	17	0	31	36	25	8	29	4	49	15	38	31	57	56	7	18	3	7	13	16	2	14	20	1	26	22
EFCAB14	4511	10401	1111	9226	2921	5998	2638	9790	5148	8037	3441	11185	4811	8649	3668	9209	2509	6664	3371	5199	985	5251	1235	4518	2089	4805	2258	5208	11825	2962	3365	3949	2795	4928	1762	3320	1282	3052	4959	4656	1501
CYP4B1	218	0	0	0	36	0	0	0	0	0	0	0	0	0	0	0	0	0	2	0	18	0	22	0	0	0	76	0	0	0	6	0	0	155	11	2	32	0	0	0	0
CYP4A11	0	0	2	0	0	0	0	0	0	0	2	0	0	0	0	0	0	2	2	0	0	0	2	0	0	0	0	2	2	0	4	0	0	0	12	0	0	0	0	0	0
CYP4A22	0	0	14	0	0	0	17	0	0	0	0	0	0	0	0	0	0	0	60	0	5	0	38	0	80	0	0	0	1	2	174	0	18	3	5	0	39	16	39	0	14
LINC00853	69	0	24	0	46	0	33	0	11	0	0	0	0	0	56	0	0	0	47	0	32	0	10	2	0	0	125	0	46	0	11	0	38	62	11	9	5	8	15	0	0
PDZK1IP1	52	0	0	0	30	0	0	0	0	0	0	0	0	0	0	0	0	0	0	0	0	0	0	0	0	0	0	0	0	0	0	0	0	251	16	0	2	0	0	0	0
TAL1	0	0	0	0	0	0	0	0	0	0	0	0	0	0	0	0	0	0	0	0	0	0	0	0	0	0	0	0	0	0	0	0	0	16	0	0	0	0	2	0	0
STIL	484	48	136	8	1111	0	1368	156	1272	0	742	190	0	0	2325	139	169	192	2136	89	417	184	1088	43	1045	44	2034	259	1357	85	1307	97	1007	2495	1787	1802	1076	3726	3835	131	367
LINC01389	67	0	0	0	12	0	8	23	0	0	0	6	0	0	21	36	0	27	20	18	4	13	34	51	14	0	38	0	60	5	26	0	9	19	9	5	20	6	7	14	0
FOXE3	0	0	0	0	0	0	0	0	0	0	0	0	0	0	0	0	0	0	0	0	0	0	0	0	0	0	0	0	0	0	0	0	0	0	0	2	1	0	0	0	0
FOXD2-AS1	151	14	58	56	302	0	183	20	90	26	127	18	0	15	30	4	58	63	392	7	10	45	212	10	126	4	6	134	140	16	266	26	204	319	717	1152	719	372	789	24	70
FOXD2	431	0	92	0	28	22	71	0	34	46	159	0	0	0	228	0	0	20	56	0	12	6	46	0	81	19	134	23	188	4	43	20	70	98	30	129	66	19	161	0	0
SLC5A9	0	35	0	104	90	0	0	0	0	14	0	131	0	0	0	0	0	62	128	59	4	22	0	41	19	0	2	21	158	13	0	22	5	13	0	0	0	0	0	20	0
BEND5	620	6864	354	4484	3010	4257	872	6011	294	4676	8386	6088	14	885	6507	5989	1454	745	333	538	677	836	889	721	1321	879	2781	843	1405	822	1564	480	32	8054	57	64	20	8	0	347	1001
LOC101929721	12	0	0	0	0	0	0	0	0	0	0	0	0	0	0	0	0	0	0	0	0	0	0	0	0	0	0	0	0	0	0	0	0	0	0	0	0	0	0	0	0
AGBL4-IT1	0	0	0	0	0	0	0	0	0	0	0	0	0	0	0	0	0	0	0	2	0	0	0	0	0	0	0	0	0	0	0	0	0	0	0	0	0	0	0	0	0
DMRTA2	0	0	0	0	0	0	0	0	0	0	0	0	0	0	0	0	0	0	28	0	0	0	0	2	0	0	60	32	0	0	2	0	0	14	6	0	0	2	0	0	32
CDKN2C	2866	292	4	8	48	560	58	738	208	194	562	338	0	339	0	161	20	106	83	2	16	46	4	0	42	0	142	102	274	4	18	26	44	1542	643	2188	300	572	1900	20	18
MIR4421	0	0	0	0	0	0	0	0	0	0	0	0	0	0	0	0	0	0	0	0	0	0	0	0	0	0	0	0	0	0	0	0	0	0	0	0	0	0	0	0	0
MIR6500	0	0	0	0	0	0	0	0	0	0	0	0	0	0	0	0	0	0	0	0	0	0	0	0	0	0	0	0	0	0	0	0	0	0	0	0	0	0	0	0	0
C1orf185	0	0	0	0	0	0	0	0	0	0	0	0	0	0	0	0	0	0	0	0	0	0	0	0	0	0	0	0	0	0	0	0	0	3	0	0	0	0	0	0	0
RNF11	826	546	776	267	1691	785	1733	583	1891	2455	1334	303	1948	288	873	953	964	682	1312	304	422	276	874	487	779	581	2553	444	6002	310	1128	883	860	6345	574	1871	1772	8029	11727	343	1175
TTC39A-AS1	0	0	0	0	0	0	0	0	0	0	0	0	0	0	0	0	0	0	0	0	2	0	0	0	4	0	0	0	0	0	5	0	0	0	0	0	0	0	0	0	0
MIR761	0	1	0	0	0	0	0	7	0	0	0	1	0	0	0	3	0	0	0	0	1	0	0	0	0	1	0	0	2	8	1	0	0	1	0	0	3	2	0	0	1
TXNDC12	9711	10348	4932	8312	7743	5271	5507	8306	5562	7296	7689	10079	2903	5404	8116	7945	884	3259	4625	3510	1387	3330	2258	2895	2830	2387	2901	5823	7105	2200	3498	6958	1067	6698	6446	6024	3361	5135	2143	2714	584
KTI12	0	0	0	0	0	0	0	0	0	0	0	0	0	0	0	0	0	0	0	0	0	0	0	0	0	0	0	0	0	0	0	0	0	0	0	0	0	0	0	0	0
TXNDC12-AS1	0	32	0	0	0	51	6	6	0	20	0	54	0	3	0	9	0	21	5	13	2	5	0	5	6	0	0	0	0	20	0	2	0	1	1	1	7	4	0	17	0
BTF3L4	3705	4593	1526	4473	2471	1741	1692	2407	1216	4386	1323	4191	730	1450	1767	1938	394	4055	3837	2529	1283	4824	897	1582	3263	2458	1191	4060	3970	2157	3042	3581	1811	4717	4401	3110	3028	5131	1764	1818	1585
ORC1	1307	50	199	209	1923	38	1918	512	3749	564	1177	0	242	561	1129	170	0	210	1328	21	824	60	1449	78	1689	92	1241	168	390	63	1416	50	738	1025	2076	2606	1527	2703	2692	12	956
PRPF38A	4782	4828	4538	4455	5355	2553	5448	5159	5169	2103	8617	4466	3326	1518	2492	6110	4734	5415	9190	5268	3535	4900	3581	3918	5552	3597	7302	5140	7034	3260	5147	3934	4285	5880	11731	4431	6184	11172	2264	3705	2049
GPX7	2663	2310	0	2615	2	1327	0	1865	396	1529	2592	2423	1696	1120	364	3125	0	1134	307	1089	24	919	6	869	389	804	2	1844	220	962	52	1522	88	0	4	0	0	0	0	986	24
FAM159A	99	920	0	1446	0	1449	0	1423	0	1625	4	1791	0	1216	0	1619	0	847	32	856	7	618	2	791	11	894	1	1578	92	711	0	381	11	0	2	0	0	0	0	718	2
COA7	1390	113	1574	347	1559	142	986	344	1371	146	980	294	2210	596	1562	556	1774	223	466	149	602	146	470	354	506	369	722	365	213	193	454	139	395	481	947	1038	863	1158	1036	255	427
ECHDC2	6748	1028	43	2139	824	1756	718	4315	173	6649	1853	3378	454	3073	5112	2586	18	408	581	247	45	264	30	812	520	149	243	818	765	406	231	180	80	0	28	30	34	115	66	193	239
MIR1273F	0	0	0	9	0	0	0	0	0	0	0	0	0	0	0	0	0	0	0	0	0	0	0	0	0	0	0	1	0	0	0	0	0	0	0	0	0	0	0	1	0
MIR5095	0	0	0	0	0	0	0	0	0	0	0	0	0	0	0	0	0	2	0	0	0	0	0	0	0	0	0	0	0	0	0	0	0	0	0	0	0	0	0	0	0
MIR1273G	0	0	0	0	0	0	0	0	0	0	0	0	0	0	0	0	0	0	0	0	0	2	0	2	0	0	0	6	0	0	0	0	0	0	0	0	0	0	0	0	0
PODN	0	0	0	0	0	0	0	0	0	0	0	0	0	0	0	0	12	0	0	0	0	0	0	0	0	0	0	0	0	0	0	0	0	0	0	0	0	0	0	0	0
SLC1A7	0	0	0	0	0	0	0	0	0	0	0	0	0	0	0	0	0	0	0	0	0	0	0	0	0	0	0	0	0	0	0	0	0	0	0	2	0	0	0	0	0
CPT2	3946	1832	652	1754	1527	2145	2706	3067	2069	2525	2288	3125	366	630	1335	3324	208	363	829	310	232	203	299	365	247	416	498	71	695	212	610	127	301	504	497	1904	532	403	1107	214	390
C1orf123	5010	2731	2937	3640	4413	1471	4148	3017	4263	2272	5396	4158	4892	2023	3442	3204	3844	1140	2832	1271	1846	1017	1794	1192	1423	1097	4848	1941	4914	1146	1897	1419	1715	3599	4285	3063	1942	3290	1121	979	942
MAGOH	1686	2685	2862	2678	3325	1699	3249	2937	3392	3248	3824	2234	2196	1278	918	1662	982	1585	2670	1062	501	1091	943	756	1266	1552	5974	2057	2897	1881	1003	757	2768	2266	3873	3555	2833	4956	1766	1114	421
LOC100507564	124	0	0	0	51	76	12	51	0	32	150	6	0	0	0	0	0	0	31	1	14	0	13	2	34	0	48	0	70	10	17	0	16	34	0	10	31	21	10	5	10
LINC01771	30	0	0	22	86	6	26	20	0	35	2	38	0	0	111	0	0	13	22	6	19	3	23	5	0	2	0	0	8	0	66	0	26	59	2	18	61	94	79	4	52
SLC25A3P1	0	0	0	0	0	0	0	0	0	0	0	0	0	0	0	0	0	0	0	0	0	0	0	0	0	0	0	0	0	0	0	0	0	0	0	0	0	0	0	0	0
DMRTB1	0	0	0	0	0	0	0	0	0	0	0	0	0	0	0	0	0	0	0	0	0	0	0	0	0	0	0	0	0	0	0	0	0	0	0	0	0	0	0	0	0
YIPF1	3122	3128	1961	2301	4185	1252	2260	2707	2859	2614	3942	2386	2	2063	3924	2354	1686	1224	2097	739	1236	1051	912	1249	900	964	1936	718	5125	1183	1962	1337	1778	4598	1317	836	1627	1710	923	733	297
DIO1	0	7	0	0	0	0	2	6	0	0	0	11	0	0	0	0	0	12	15	8	6	17	48	21	13	0	0	0	65	20	1	4	7	34	14	7	70	1	3	32	0
LRRC42	2255	1222	851	276	1618	1103	1461	893	1954	791	2185	1157	435	448	2350	514	614	221	513	255	159	133	577	264	677	219	281	63	179	199	867	45	526	1157	729	1689	932	1040	972	68	268
LDLRAD1	0	0	0	0	0	0	0	0	0	0	0	0	0	0	0	0	0	0	0	0	0	0	0	0	1	0	0	0	2	4	0	0	0	0	0	0	0	0	0	0	2
TMEM59	22915	27101	15668	21926	11415	11947	10193	16787	16302	21216	19356	19930	4246	13286	28822	21948	6394	11135	11732	11877	5268	12103	3971	7335	7682	7694	6658	15373	34686	6621	8446	17056	6462	18732	9434	4398	5552	9101	2595	7761	1255
MIR4781	0	0	0	0	5	0	0	0	0	0	0	0	0	0	0	9	0	1	3	0	0	0	2	2	0	14	28	0	0	0	3	0	1	0	0	0	0	2	0	0	0
CDCP2	0	0	0	0	0	0	0	0	0	2	0	0	0	0	0	5	0	0	0	0	0	4	0	0	0	0	0	0	0	0	0	0	0	0	7	2	0	0	0	5	0
MRPL37	14403	5177	17816	6142	14172	2484	13242	5760	10968	4701	13808	6056	13708	1700	7691	5203	7047	885	2602	604	994	859	1819	1430	2183	1118	2440	856	1711	819	3571	810	1992	3010	3253	6015	2725	6906	4975	505	1133
SSBP3-AS1	333	0	0	17	0	0	0	106	0	28	0	0	0	6	2	26	0	99	268	48	65	99	32	43	105	119	0	43	490	66	218	49	48	141	116	55	8	15	24	79	50
FAM151A	6131	0	0	2	260	0	83	0	0	0	0	0	0	0	0	0	7	1	33	0	25	0	54	0	19	0	0	0	83	0	90	0	5	0	448	91	30	2	0	0	0
MROH7	0	0	0	0	0	0	0	0	0	0	0	0	0	0	0	0	0	0	0	0	0	0	0	0	4	0	0	0	4	0	10	0	0	0	0	0	0	0	0	0	0
TTC4	157	135	165	111	232	73	329	138	217	116	349	233	204	97	350	200	189	59	170	93	185	39	116	53	74	75	305	156	130	163	113	20	90	137	177	63	182	178	52	38	27
PARS2	209	218	2	60	767	426	357	326	96	0	0	438	60	0	320	665	6	175	321	119	297	84	223	122	330	62	23	4	758	81	307	120	146	302	696	450	474	393	263	46	172
TTC22	522	164	0	167	0	285	0	387	73	181	10	219	0	130	0	428	0	6	5	12	2	6	0	15	9	14	4	108	0	34	0	28	0	7	0	0	0	0	0	4	1
LEXM	0	0	0	0	88	0	7	0	0	0	110	0	0	0	0	0	0	0	99	0	6	0	8	0	11	0	0	0	0	3	31	0	0	0	6	2	0	0	0	0	0
DHCR24	4021	0	1158	554	5350	275	2587	1022	7549	0	7156	1002	9380	220	12620	322	220	84	1371	80	619	246	1159	282	2036	0	294	178	524	62	2455	22	292	348	8093	15690	6213	6123	12612	114	954
TMEM61	0	0	0	0	0	0	0	0	0	0	0	0	0	0	0	0	0	0	0	0	0	0	0	0	0	0	0	0	0	0	0	0	0	0	0	0	0	0	0	0	0
BSND	0	0	0	0	0	0	0	0	0	0	0	0	0	0	0	0	0	0	0	0	0	0	0	0	2	0	0	0	0	0	0	0	0	0	0	0	0	0	0	0	0
PCSK9	0	0	0	0	0	0	0	0	0	0	0	0	0	0	0	0	0	0	0	0	0	0	0	0	0	0	0	0	0	0	0	0	0	0	0	0	0	0	0	0	0
LOC100507634	341	128	324	600	62	1061	174	820	272	422	925	282	0	36	124	369	2	34	4	20	0	24	20	50	32	106	14	130	0	30	24	10	38	6	0	55	14	22	48	24	0
MIR4422	0	11	0	0	10	0	0	0	0	0	0	0	0	0	0	0	0	0	0	1	0	4	0	1	0	10	0	0	0	0	0	2	0	0	0	0	0	0	0	4	0
LOC101929935	0	0	1	0	0	0	0	0	0	0	0	0	0	0	0	0	0	0	0	0	0	0	0	0	0	0	0	0	0	0	0	0	0	0	0	0	0	0	0	0	0
C8A	0	0	0	0	0	0	0	0	0	0	0	0	0	0	0	0	0	5	0	0	3	0	0	0	0	0	0	0	0	0	0	0	0	0	0	0	0	0	0	0	0
TACSTD2	0	0	0	0	0	0	21	0	0	0	0	0	0	0	0	0	0	0	1	2	0	0	0	0	0	0	0	0	0	0	0	0	20	0	0	0	0	0	0	0	0
MYSM1	903	1302	388	2652	1427	751	1090	1565	1096	2030	1461	1405	0	1462	1009	1963	1582	3330	2557	2609	945	3607	1446	3627	2276	3688	2332	6001	10112	1820	2257	1222	876	1444	1516	1547	1286	2451	2135	2609	1881
JUN	70166	56028	5144	73584	29850	252357	75058	244551	56816	166555	40659	240983	14608	64580	24845	125437	40421	5216	1904	3799	722	1181	222	13102	2103	22469	5869	2815	2125	8837	3409	4256	727	598	162	1172	174	234	3225	3642	455
LINC01135	117	76	1	178	100	209	253	169	165	92	119	242	0	300	62	188	111	53	14	33	20	32	7	94	6	70	45	18	39	26	10	2	12	13	0	0	8	2	4	51	0
HSD52	54	0	0	0	5	46	47	12	74	0	0	0	0	0	0	27	0	0	66	4	0	0	8	0	0	0	0	0	117	0	11	0	0	47	0	0	11	0	0	0	0
MIR4711	0	0	0	0	0	0	0	0	0	0	0	0	0	0	0	0	0	0	2	0	4	0	1	0	2	0	0	1	0	0	4	0	0	0	0	0	0	0	2	0	0
LOC101926944	0	0	102	56	32	0	0	0	101	0	36	9	272	315	71	37	0	11	83	3	12	8	3	8	29	0	32	27	224	0	52	15	9	77	16	1	0	15	11	3	13
CYP2J2	0	284	20	0	114	2	552	0	839	140	0	380	0	45	304	0	408	48	0	46	0	28	68	108	21	0	315	126	260	28	194	79	283	0	124	36	18	493	210	44	99
C1orf87	0	0	0	0	0	0	0	0	0	0	0	0	0	0	0	0	0	1	0	0	0	0	2	1	0	0	0	2	0	0	0	0	0	2	0	0	0	0	0	0	0
NFIA-AS2	0	0	0	0	0	0	0	0	0	0	0	0	0	0	0	0	0	0	2	0	0	2	102	0	0	0	0	2	0	0	0	0	0	7	0	2	0	23	31	0	0
NFIA-AS1	0	0	0	0	0	0	0	0	0	0	0	0	0	0	0	0	0	0	16	1	0	0	2	0	0	0	0	0	0	0	0	0	0	1	2	0	2	8	1	1	0
MGC34796	6	0	0	0	0	0	0	0	0	0	2	0	0	0	129	0	0	6	0	2	0	1	0	4	0	0	0	0	0	0	0	0	0	0	0	0	0	0	0	0	0
TM2D1	2179	2006	2116	2816	2426	1185	995	2300	3284	1943	2178	2152	333	2607	2962	2033	356	2827	2079	2105	1087	2920	1553	1713	1278	1870	2259	2735	7510	2396	1654	2324	1239	4664	2661	981	2841	2434	678	1845	655
MIR3116-1	0	0	0	0	0	0	0	0	0	0	0	0	0	0	0	0	0	0	0	0	0	0	0	0	0	0	0	0	0	0	0	0	0	0	0	0	0	0	0	0	0
MIR3116-2	0	0	0	0	0	0	0	0	0	0	0	0	0	0	0	0	0	0	0	0	0	0	0	0	0	0	0	0	0	0	0	0	0	0	0	0	0	0	0	0	0
L1TD1	0	0	6	4	0	0	0	266	24	0	0	214	0	0	0	4	0	67	5	0	0	24	0	321	0	76	0	516	0	54	0	12	0	0	1	0	0	2	0	0	0
ANGPTL3	44	0	0	0	8	0	0	0	0	0	0	0	0	0	0	0	0	12	6	0	11	2	17	24	3	2	0	201	15	0	0	0	0	1	2	2	12	0	2	14	55
FOXD3-AS1	0	0	142	0	196	0	68	78	697	0	73	0	383	73	434	34	0	0	11	0	0	0	0	0	20	0	43	0	46	0	0	0	198	31	0	0	34	50	132	0	44
FOXD3	0	0	0	0	75	0	0	0	86	0	0	0	0	0	70	0	0	0	0	0	0	0	0	0	29	0	0	0	0	0	0	0	44	2	0	0	22	18	66	0	8
MIR6068	0	0	0	0	0	0	0	0	0	0	0	0	0	0	0	0	0	0	0	0	0	0	0	0	0	0	0	0	0	0	0	0	0	0	0	0	0	0	0	0	0
ALG6	4170	2321	1329	2534	3499	1435	2194	3630	3342	1782	2263	2415	2668	2218	2867	2756	2414	1663	3535	1352	940	1717	2113	1671	1799	1987	2440	2935	5080	1001	2829	1604	1114	3684	3858	1430	3787	2178	780	1068	731
EFCAB7	1300	1210	1261	815	770	114	722	810	2088	837	390	518	92	484	1331	669	1712	710	1575	637	297	705	284	455	1037	1042	430	1145	2850	431	866	556	613	1020	615	277	1891	856	401	524	473
DLEU2L	72	190	88	204	32	130	148	220	246	100	50	200	94	76	112	210	56	139	89	104	44	151	17	44	65	36	116	170	219	57	81	39	84	45	61	8	120	76	38	163	154
ROR1-AS1	0	0	0	0	0	0	0	0	0	0	0	53	0	0	0	0	0	0	10	0	0	0	0	31	0	0	0	0	0	11	0	0	0	0	0	0	0	0	0	33	0
UBE2U	22	0	0	0	0	0	0	0	0	0	0	0	0	0	0	0	0	0	0	0	0	0	0	0	2	0	0	0	0	0	0	0	0	0	0	0	0	0	0	0	0
MIR4794	4	0	0	0	0	0	0	0	0	0	0	0	0	0	0	0	0	0	0	0	0	0	0	0	0	0	0	0	0	0	0	0	0	0	0	0	0	1	0	0	26
LINC01359	9	18	0	15	0	19	0	0	6	18	39	12	0	0	0	16	0	9	0	0	0	6	3	15	0	7	0	0	59	0	8	5	6	38	7	3	0	2	2	0	0
MIR3671	6	8	60	38	17	2	0	27	6	21	9	0	0	33	0	17	0	62	15	51	10	63	6	42	8	51	16	41	54	17	39	59	9	29	7	2	15	2	0	24	0
MIR101-1	0	2	15	15	20	8	2	17	1	22	1	3	0	26	0	7	0	85	32	161	18	52	21	47	7	84	9	24	14	169	44	80	16	39	23	0	35	1	0	52	0
LEPROT	2026	1117	705	350	1220	284	911	1341	1370	872	1027	756	1737	996	1507	847	42	811	1506	980	592	714	728	898	1475	1133	1707	2282	12338	420	1535	656	1774	4660	1538	1659	1345	2055	3068	758	1186
LOC101927139	0	0	0	0	0	0	0	0	0	0	0	0	0	0	0	0	0	0	0	0	0	0	0	0	0	0	0	0	1	0	0	0	0	0	0	0	0	0	0	0	0
MIR3117	0	0	0	0	0	0	0	0	0	0	0	0	0	0	0	0	0	0	0	0	0	0	0	0	0	0	0	0	0	0	0	0	0	0	0	0	0	0	0	0	0
INSL5	0	0	0	0	0	0	0	0	0	0	0	0	0	0	0	0	0	0	0	0	0	0	0	10	0	0	0	0	0	0	0	0	0	0	0	0	0	0	0	0	0
MIER1	4348	2783	1026	3834	3580	3739	1301	3140	4079	4631	1726	4078	2890	2639	3256	3767	2083	10204	9662	5291	2381	13097	4160	8264	7070	7704	7349	10083	23053	4183	8214	10170	4915	9742	7432	2538	9387	6270	1786	3794	3160
C1orf141	0	0	0	0	0	0	0	0	19	0	0	0	0	0	0	0	0	0	0	0	0	0	0	0	0	26	0	0	0	0	0	0	0	0	0	0	0	0	0	0	0
IL12RB2	3241	161	1	0	42	14	144	8	0	87	1640	1	3471	0	0	312	0	19	1564	8	223	8	4	17	534	0	0	108	343	3	3	17	135	48	32	33	19	5	9	11	76
GADD45A	62828	477	7370	1122	13070	1724	39711	2601	85654	1714	17519	1879	2330	3040	15372	1319	17386	119	6894	122	1398	31	606	150	1390	650	2259	160	1230	48	1948	271	831	805	505	1379	124	433	523	68	676
DIRAS3	312	0	0	0	0	0	0	0	0	0	0	0	0	0	0	0	0	0	3	0	0	0	0	0	30	0	0	0	0	0	0	0	0	0	0	25	0	0	0	2	37
MIR1262	0	0	0	0	0	0	0	0	0	0	0	0	0	0	0	0	0	0	0	0	0	0	0	0	0	0	0	0	0	0	0	0	0	0	0	0	0	0	0	0	0
RPE65	0	0	0	0	0	0	0	0	0	0	0	0	0	0	0	0	0	0	0	0	0	0	0	0	0	0	0	0	0	0	0	0	0	0	0	0	0	0	0	0	0
DEPDC1-AS1	13	0	183	0	11	0	55	16	60	0	0	0	0	0	0	0	0	8	3	0	14	6	42	0	10	0	11	0	0	0	42	0	22	6	0	8	92	41	28	0	0
SRSF11	11450	13007	12890	20066	17156	16087	9605	19919	17939	17347	19470	13823	12283	18793	16518	17001	14787	13982	11769	9591	5399	9999	5511	16669	8991	14390	10164	29379	29246	8465	12318	9679	5317	7942	7400	6558	7918	10851	5901	9925	10611
HHLA3	967	898	521	982	1007	202	354	545	1039	653	435	877	0	331	1033	768	260	420	491	390	297	286	287	531	261	260	404	289	1817	383	380	310	356	2123	738	528	733	751	455	408	32
CTH	17	15	514	243	3960	317	1627	102	758	301	792	129	206	3	2356	1	827	242	442	82	52	24	1516	210	126	236	2518	1	2579	70	260	472	1015	3883	222	80	494	2379	734	99	138
LINC01788	0	0	0	0	0	0	0	0	0	0	0	0	0	0	0	0	0	0	0	0	0	0	0	0	0	0	0	0	0	0	0	0	0	0	0	0	0	0	0	0	0
ZRANB2-AS1	0	9	13	20	4	0	0	18	5	16	1	23	0	9	0	25	0	171	90	141	7	144	110	145	29	158	35	301	251	50	188	21	15	96	55	21	79	52	23	90	19
ZRANB2	4275	8021	8975	10797	11101	7040	6074	8582	9484	6265	8002	10952	2870	9283	8186	11028	3166	10907	11305	9089	6330	10909	7187	12605	9094	9447	11205	21006	31471	7180	13166	6284	9183	17024	13791	5071	20696	19091	4583	7515	5338
MIR186	0	7	7	5	12	0	2	0	6	5	5	10	0	0	0	15	0	83	60	58	12	73	34	58	16	67	9	82	80	55	54	21	18	29	36	9	14	10	4	41	0
NEGR1-IT1	0	0	0	0	0	0	0	0	0	0	0	0	0	0	0	0	0	0	0	0	0	0	0	0	0	0	0	0	0	0	0	0	0	0	0	0	0	0	0	0	0
FPGT	314	756	156	82	283	405	290	770	879	321	1278	801	0	0	737	394	0	466	447	406	46	505	544	504	560	143	351	493	2646	229	337	346	536	1274	1657	753	1349	1171	412	394	334
ERICH3-AS1	0	0	0	0	0	0	0	0	0	0	0	0	0	0	0	0	0	0	0	0	0	0	0	0	0	0	0	0	0	0	0	0	0	0	0	0	0	0	0	0	0
CRYZ	1273	3021	5048	2691	9980	1174	2373	2367	8984	1260	4026	2068	770	1049	7927	1494	5154	2530	4481	2920	3942	2108	1849	1623	1789	2011	7200	2949	12475	1725	3610	1935	3840	8124	3275	1011	8116	6015	3024	1949	2554
TYW3	1018	1067	2538	1168	2873	552	1001	878	3323	774	2279	717	1040	1708	1413	1450	314	1583	2398	1245	1032	1348	1262	1237	1051	1294	2192	2132	3569	714	1780	1528	1273	2686	3366	2132	3321	3494	1749	1170	1003
LHX8	0	0	0	0	0	0	0	0	0	0	0	0	0	0	0	0	0	0	0	0	0	0	0	0	0	0	0	0	0	0	0	0	0	14	392	531	0	0	0	0	0
ACADM	4790	7811	9012	6747	5530	3702	5134	5694	14116	4054	5176	6773	1408	3417	7389	8657	4892	6915	4277	5406	3014	8213	3083	6798	4193	3940	2516	6587	10003	3567	6097	8360	3777	12156	7259	2939	6677	10640	3532	6370	2215
DLSTP1	8	108	46	36	140	20	111	86	80	255	34	197	18	269	18	154	40	103	90	71	46	76	66	229	56	61	48	331	283	68	64	20	56	68	78	178	60	42	202	244	37
RABGGTB	1538	2680	3236	3693	5456	2064	2624	2794	6045	3143	4224	3437	6391	2156	2478	2244	1206	4417	5983	4071	3477	3559	3934	3796	2735	4750	6343	4311	10553	2515	5673	3193	4299	3658	3125	3270	6597	7832	3793	2298	3529
SNORD45C	23	17	40	42	49	14	54	21	38	0	115	49	65	31	18	48	0	53	57	32	54	52	53	67	39	66	226	34	65	21	160	12	68	20	30	11	44	96	19	42	36
SNORD45A	8	22	11	0	57	18	31	34	46	19	26	1	24	0	0	6	4	138	79	63	58	54	76	71	40	81	70	55	131	45	150	3	46	37	12	2	41	88	37	42	27
SNORD45B	50	45	48	44	37	38	6	12	55	81	0	33	0	0	60	18	0	180	149	118	47	110	102	113	77	143	167	64	118	24	199	18	62	50	15	14	57	102	42	70	113
ASB17	0	0	0	0	0	0	0	0	0	0	0	0	0	0	0	0	0	0	0	0	0	0	0	0	0	0	0	0	0	0	0	0	0	1	0	0	2	0	7	0	0
LOC101927342	0	0	0	0	0	0	0	0	0	0	0	0	0	0	0	0	0	2	0	0	0	0	0	0	0	14	0	0	0	0	0	0	0	1	0	0	0	0	0	0	0
MIR7156	0	0	0	0	0	0	0	0	0	0	0	0	0	0	0	0	0	0	0	0	0	0	0	0	0	0	0	0	0	0	0	0	0	0	0	0	0	0	0	0	0
USP33	2495	2548	599	2970	945	2585	1094	4357	3240	3882	2276	1855	62	2368	1547	3588	115	4923	3943	3101	690	4510	1450	3917	2574	3110	1722	7125	6726	2314	3151	2273	1172	3295	3231	2330	2627	3355	2460	2595	1199
NEXN-AS1	0	38	0	19	0	84	0	26	0	35	0	0	0	0	0	0	0	16	1	2	0	18	0	30	24	35	0	64	14	18	1	1	4	1	3	0	12	2	7	7	0
FUBP1	3510	4637	4355	5769	6478	4500	3369	4741	7344	4418	2379	5192	1581	2164	3116	6366	3235	6979	10102	4812	3625	4550	3319	5842	8334	4140	5451	7187	8993	2737	7343	2279	4584	8857	4539	5080	6102	10040	7516	4320	4068
DNAJB4	585	802	231	1970	2257	850	657	1704	1261	962	2177	961	472	527	2810	1713	1678	2011	1550	2299	1246	1157	985	2243	1647	4793	4924	1382	4728	820	561	3247	1047	2566	1051	261	2002	2379	486	555	533
PTGFR	0	0	0	0	0	0	28	0	0	6	0	0	0	0	0	0	0	0	2	0	0	0	0	0	0	0	0	0	0	0	0	0	0	0	0	0	0	0	0	0	0
IFI44L	1192	20743	644	3787	0	2212	0	2614	24	8405	310	1637	0	1202	0	13596	2	17036	374	22471	544	5449	144	23996	156	2151	14	8276	19660	8791	29	6371	4948	623	76	55	2279	4935	1391	12846	69
IFI44	899	7182	624	1560	66	1467	62	795	304	2181	264	1962	0	552	6	4068	6	2191	276	4908	294	1136	59	3568	62	937	240	3376	5901	2148	3	1379	432	1755	76	98	634	492	174	1798	29
LOC101927434	0	0	0	0	0	0	0	0	0	0	0	0	0	0	0	0	0	7	0	0	0	0	0	8	0	0	0	2	0	0	2	0	0	0	0	0	27	42	5	0	0
LINC01361	0	0	0	0	0	0	0	0	0	0	0	0	0	0	0	0	0	5	0	7	0	2	0	7	0	0	0	0	0	0	0	0	0	0	0	0	0	0	0	5	0
UOX	0	0	0	0	0	0	0	0	0	0	0	0	576	0	0	0	0	0	0	0	0	0	0	0	0	0	0	0	0	0	0	0	0	0	0	1	0	0	0	0	0
DNASE2B	0	0	0	0	0	0	0	0	0	0	0	0	0	0	0	0	0	0	0	0	0	0	0	0	0	0	0	0	0	0	0	0	0	0	0	0	0	0	0	0	0
RPF1	5213	5083	5822	5857	3286	2720	1464	6004	11375	9466	9479	6013	4202	3408	4298	4743	4957	3316	4047	3414	1693	3037	2275	2367	2413	2322	2483	3275	5207	3020	4124	5527	3183	4652	5409	3789	5225	8310	2143	2062	1983
GNG5	13517	12445	32317	12946	24463	7905	13504	11073	68663	7569	38643	10068	24403	5124	14470	10995	22472	2984	15782	4945	6316	3545	8172	4450	6433	5630	14482	5849	24173	7757	9086	6079	9242	7422	6078	3859	11379	25029	6623	3322	1643
SPATA1	42	105	3	81	28	28	0	138	80	58	60	108	36	38	24	134	0	276	155	226	40	290	136	164	69	267	32	479	479	107	54	32	108	122	56	27	26	50	21	151	69
CTBS	2849	4414	1546	3974	2125	2865	1658	4206	4758	3915	1732	4509	404	1760	3168	5163	1725	1216	1090	817	394	1456	589	852	652	1836	585	3175	3135	819	211	878	309	1069	294	880	316	220	830	853	392
LINC01555	0	0	0	0	0	0	0	0	0	0	0	0	0	0	0	0	0	0	16	0	0	0	0	0	0	0	0	0	0	0	0	0	0	0	0	4	0	0	0	2	0
SSX2IP	473	777	948	462	766	104	424	248	6295	50	538	102	1932	222	12	632	869	318	916	279	90	294	1653	235	573	160	901	424	664	186	1148	294	1826	754	887	1159	1271	6504	4490	121	366
MCOLN3	212	0	0	0	216	0	27	0	315	0	16	0	0	0	212	0	616	6	245	0	21	2	6	20	283	2	0	0	650	0	2	0	367	343	20	2	73	239	68	0	32
MIR4423	0	0	0	0	0	0	0	0	0	0	0	0	0	0	0	0	0	0	0	0	0	0	0	0	0	0	0	0	0	0	0	0	0	0	0	0	2	9	0	0	0
SYDE2	84	0	138	12	622	0	578	0	683	163	330	38	0	159	480	0	1610	21	33	11	4	4	118	83	118	0	100	32	2	33	0	0	151	50	92	176	93	19	19	9	178
BCL10	729	4656	500	1728	706	1969	774	2306	1131	3096	1109	3116	1285	1254	1723	1736	1150	3853	2270	2395	915	3843	1593	2192	1739	3593	1971	4100	7054	1307	1922	5102	1790	2327	1849	762	1406	1806	781	835	2361
LOC646626	89	110	0	154	64	232	9	371	63	157	9	185	0	161	0	132	0	69	12	24	7	43	1	176	9	221	14	121	59	33	43	24	0	1	3	4	10	9	4	54	2
CYR61	0	0	0	0	158	0	0	88	94	0	1402	0	0	0	392	0	1333	8	52	0	44	0	0	0	10	2	406	2	38	0	0	0	0	2	0	0	0	8	4	5	14
ZNHIT6	999	1869	518	1888	2578	1782	812	1469	2047	1187	1429	1796	520	1228	559	2560	758	1912	1943	1761	1226	1648	1211	1661	1451	1557	1345	2706	4060	1022	1252	1004	1309	1695	2528	1808	1942	3337	1874	1653	1871
ODF2L	3115	2022	1197	2495	897	3071	469	3871	4821	3031	2162	4013	1077	2364	1717	2813	712	2526	3190	2660	517	2092	151	3660	1190	2543	1861	4964	3227	1820	1834	1380	821	1544	72	7	446	1458	582	2984	1003
MIR7856	0	0	0	6	1	0	0	6	0	0	0	6	0	0	0	2	0	12	10	10	0	8	0	10	2	5	0	13	3	3	6	7	0	3	0	0	0	4	0	29	8
CLCA1	0	0	0	0	0	0	0	0	0	0	0	0	0	0	0	0	0	2	5	0	0	0	0	0	0	0	4	0	0	0	0	0	0	0	0	0	0	0	0	0	0
CLCA3P	0	0	0	0	0	0	0	0	0	0	0	0	0	0	0	0	0	3	2	0	0	3	2	10	0	6	0	4	0	0	0	0	0	0	0	0	0	2	0	0	0
SH3GLB1	6235	7357	3430	6384	6998	4443	4211	5816	13699	8848	9068	6562	2752	3271	7218	5838	5704	2102	1886	1936	954	2612	1448	1636	1021	2991	2256	1888	8280	2037	2338	2465	1059	2808	1361	2525	2263	3102	3673	1465	897
SELENOF	11603	28851	13216	23701	13739	8999	11021	19213	17692	17018	21590	24368	10578	13747	14698	17265	11651	13544	12765	14403	5046	11114	6801	7155	6167	7640	9284	13654	22772	8178	8702	13463	4475	15560	10905	8048	7787	13996	5362	8340	4337
LINC01140	212	0	0	0	0	0	0	0	108	0	0	94	0	0	0	0	724	0	0	22	0	2	0	0	2	0	2	0	0	2	0	0	0	1	0	14	0	20	4	0	0
LMO4	3409	1262	670	1971	7510	2222	2796	1731	1732	2640	2665	1997	1607	1958	6097	2069	1946	668	1186	463	417	508	352	1580	852	907	1385	911	3748	991	1692	705	1165	1885	818	2577	674	856	2198	634	342
LINC01364	0	0	0	0	0	0	0	0	0	0	0	0	0	0	0	0	0	8	5	1	0	0	0	21	3	0	0	8	3	6	0	0	0	2	0	0	8	4	0	7	3
GTF2B	3984	4382	4444	3453	3697	4252	4072	2859	8752	10097	7205	5852	2286	3092	5165	3807	2695	3544	4825	3385	2467	1801	1434	1144	1429	2761	1692	3289	6803	2025	2064	4426	1406	3619	2138	1571	2894	4771	1494	1392	820
KYAT3	1806	2057	2405	1623	3963	1979	2061	2581	5291	2064	3571	2200	1245	1034	2613	2610	0	1268	3561	905	474	1064	1912	1234	682	761	1654	1516	3781	745	2251	1012	577	1085	590	841	478	807	1003	616	735
RBMXL1	2225	2205	1639	1880	3231	1468	2806	2709	4972	3319	3480	2851	1086	1304	1340	2134	3711	2633	4847	2296	2549	1766	3516	1666	2713	1379	1679	1919	8460	764	2879	1968	1779	2184	3160	2465	2231	5954	4182	1578	1276
GBP3	551	1363	2	1096	3	562	1	652	9	425	3	1586	0	407	2	1606	4	1191	259	1184	236	1672	287	1068	68	1028	41	2553	286	524	47	1037	630	245	57	139	220	1586	758	1563	298
GBP2	15842	11806	5281	9352	18741	4838	3747	7563	11140	5937	6414	8806	2372	2045	1188	13957	5143	4132	18374	5755	2176	5630	7626	6170	2832	2697	2777	10749	14501	3803	7707	16470	10844	9845	875	391	547	1296	437	10939	1412
GBP7	8	31	0	9	0	4	1	10	6	28	1	216	0	43	7	9	3	9	8	94	19	103	16	102	5	91	0	17	46	1	12	29	13	10	2	0	6	48	20	168	95
GBP5	10621	6259	141	5207	301	3841	129	5350	794	4497	361	6877	2014	660	0	6996	837	3587	6866	4034	1528	2808	71	5930	1430	2867	10	6367	2284	1850	109	10510	1258	10	74	36	2536	2422	2688	6890	2954
LOC729930	4	0	0	0	0	0	0	0	0	0	0	0	0	0	0	0	0	0	0	0	0	0	0	0	0	0	0	0	30	0	0	0	0	0	6	0	0	0	0	3	0
GBP6	2	8	42	81	256	0	242	0	0	2	0	2	3	0	327	0	476	11	142	4	49	8	112	53	0	0	76	3	1108	0	105	12	44	61	16	4	0	30	49	7	150
GBP1P1	229	169	6	108	0	60	0	122	10	38	4	138	0	0	136	218	0	10	10	48	3	17	17	202	4	0	19	1	398	23	27	309	19	82	14	5	0	154	11	65	23
FLJ27354	40	203	0	296	13	324	0	409	27	589	213	346	0	91	0	442	174	112	19	135	5	55	53	84	6	178	2	118	0	102	20	64	40	67	5	11	27	58	22	72	0
GEMIN8P4	60	2	526	8	200	2	192	195	680	8	629	12	0	220	4	2	938	41	334	4	45	8	178	0	88	0	14	0	188	2	130	8	64	288	170	148	470	403	99	14	82
ZNF326	3276	2062	2740	2949	4573	2445	2495	3671	7270	4666	2143	3428	2468	2223	2471	2024	1669	2944	2800	2157	1388	1729	3663	2588	5247	3239	2690	4525	5740	1465	5914	1323	1887	2090	3252	3022	4323	5228	3319	1419	1662
BARHL2	0	0	0	0	0	0	0	0	0	0	0	0	0	0	0	0	0	0	0	0	0	0	0	0	0	0	17	0	27	0	0	0	0	0	0	0	0	0	0	0	0
LOC105378853	38	0	0	0	0	0	24	0	0	0	49	56	0	0	62	0	0	0	17	0	2	0	2	5	84	0	77	0	154	4	29	0	0	0	0	11	12	2	0	0	0
ZNF644	3146	7007	1830	7022	5209	5392	3387	7157	2514	10634	4679	5149	296	4433	3512	6952	2398	4656	5759	4847	2315	3277	2805	3932	4412	5941	2533	9332	10491	3115	5285	2360	2249	4554	2893	1921	3336	8841	5089	4089	6166
CDC7	1142	566	1019	506	2639	207	2249	512	3918	177	3735	676	0	1121	1004	234	496	592	2772	318	851	523	2010	245	1796	171	2307	397	1155	200	4847	230	1314	6328	5005	2012	4198	5335	2951	221	727
BRDT	0	0	0	0	0	0	0	0	0	0	0	0	0	0	0	0	0	0	0	0	0	0	0	0	0	0	0	0	0	0	0	0	0	0	0	0	0	0	0	0	0
EPHX4	0	0	0	0	0	0	0	0	52	0	0	0	0	0	0	0	0	0	0	0	0	0	0	0	7	0	0	0	0	0	0	0	0	0	0	0	25	0	0	0	0
SETSIP	8	58	14	112	24	72	40	96	50	78	56	72	16	20	14	60	56	22	32	40	37	34	29	30	31	18	6	191	117	38	51	12	28	24	20	230	18	54	360	23	18
BTBD8	30	32	0	0	80	50	0	27	191	7	40	32	120	0	0	51	190	30	107	35	74	12	41	29	65	8	26	0	334	21	99	5	43	60	6	0	27	57	31	25	2
KIAA1107	0	0	0	0	104	0	0	0	50	0	0	4	2	0	0	22	0	31	446	26	119	31	70	131	173	0	13	0	843	14	137	45	73	169	517	106	48	214	197	11	153
C1orf146	22	0	0	19	2	0	0	0	0	0	2	0	0	18	10	19	0	18	8	0	0	6	4	17	9	0	0	7	20	10	6	8	0	4	12	4	9	14	3	5	40
GLMN	829	703	504	1255	1451	561	1195	1797	4000	651	2414	1015	2285	911	2369	1083	1584	587	1593	552	596	662	1081	661	1138	868	2784	1509	2352	304	1639	517	1161	1422	1529	755	2342	4067	733	482	827
GFI1	1539	14	122	0	148	8	556	108	4231	144	324	0	0	0	661	157	1204	20	196	4	34	6	197	0	64	0	0	0	311	0	4	2	1266	0	40	193	859	210	1083	0	148
RPL5	16476	31645	65108	51681	89246	36776	58217	46532	87753	52229	66410	55170	41896	17044	35541	35761	31639	57467	72520	67066	84353	52940	54126	64435	61765	66913	94433	49909	83831	62357	83482	35293	43194	53683	55929	65744	66095	114984	61605	46182	26037
SNORD21	0	0	0	38	10	58	0	0	0	49	0	7	0	55	23	6	0	64	57	33	17	35	30	48	7	91	4	0	64	31	35	31	9	24	18	17	44	41	16	33	78
SNORA66	0	25	0	67	0	25	11	61	3	19	18	21	0	72	5	4	0	246	259	98	38	211	76	115	79	253	133	155	210	30	197	171	40	52	76	15	94	212	19	122	143
TMED5	2831	4149	2750	4332	3581	2678	3456	4772	5161	3699	4303	4980	2304	2419	4791	5416	8994	6518	5428	4169	2248	6591	4103	4810	4477	5042	3273	5689	12717	3353	4327	4892	2648	6821	4077	2077	6113	18332	8579	3152	2505
CCDC18-AS1	3386	6492	1578	9484	2215	7890	780	13763	1569	9410	3455	11059	1748	18663	2372	12197	83	9098	3167	4439	639	4565	562	5291	829	4797	2199	7077	13242	3768	1624	1031	907	3521	1968	569	1539	1408	523	5038	489
DR1	4611	4371	2126	2605	4168	4197	4327	4755	9639	5958	8683	4522	3388	3160	7848	5805	5035	1394	2014	807	569	1245	1097	891	1741	1295	1850	632	2989	965	2462	1312	1211	2201	2273	5330	1920	6917	8368	840	2308
LOC100129046	0	0	0	40	0	0	0	14	0	31	0	7	0	0	0	83	0	19	0	23	8	19	0	26	0	31	0	55	0	17	18	5	0	0	0	0	0	4	7	18	0
MIR760	33	70	0	56	15	154	71	60	34	115	78	37	39	97	10	123	0	0	0	0	0	2	0	3	0	5	0	0	0	4	3	0	2	0	0	2	0	0	2	3	0
DNTTIP2	17457	8451	21119	9247	9173	9331	17035	9629	23561	18851	28816	10820	10319	7479	16442	9885	10614	12662	14290	8348	5250	6831	5549	6975	7946	5531	13125	9726	20035	5439	12464	15976	5375	10234	11910	4206	15755	26581	6890	5632	5477
ARHGAP29	378	0	0	0	1123	0	9	0	190	0	0	0	670	0	0	0	1722	8	597	2	227	4	41	4	1939	2	872	10	1852	0	511	6	2386	2	624	565	1267	190	398	13	5799
F3	0	0	0	20	15	0	0	0	108	0	0	0	0	0	0	0	0	12	4	0	2	7	0	21	2	0	54	0	3	10	2	18	4	13	20	52	0	0	0	0	0
MIR378G	0	0	0	0	0	0	0	0	0	0	0	0	0	0	0	0	0	0	0	0	0	0	0	0	0	0	0	0	0	0	0	0	0	0	0	0	0	0	0	0	0
CNN3	2349	168	0	390	0	4	0	836	0	1912	22	955	0	1019	5110	230	2720	98	38	160	10	111	6	256	529	559	2	40	168	115	4	507	18	12	0	0	28	14	0	145	2272
ALG14	918	989	2248	586	1012	507	1595	934	1997	419	2388	1126	740	634	647	314	1571	456	894	399	373	399	403	313	704	356	1263	283	1655	440	957	304	492	2143	848	335	622	1218	276	369	226
LOC101928098	0	2	0	0	0	0	0	0	0	0	0	0	0	0	0	0	0	5	3	7	7	2	10	12	8	0	0	2	0	0	13	0	0	0	8	1	0	5	0	4	0
TMEM56	0	0	0	0	16	0	0	0	147	0	0	98	0	0	8	38	0	110	223	45	28	66	201	2	196	84	422	3	2	74	181	44	108	1401	443	800	243	34	338	222	114
RWDD3	1734	1467	1529	2210	1426	1107	618	2506	1451	2344	1087	1671	779	2037	1227	2033	431	2318	1421	1557	423	1489	613	1013	614	1279	736	2676	2003	2168	997	1897	783	1436	1158	266	845	819	300	1322	642
LINC01760	0	0	0	0	0	0	0	0	0	0	0	0	0	0	0	0	0	0	0	10	0	0	0	0	0	0	0	0	0	0	0	0	0	0	0	0	0	0	0	0	0
LOC100996635	0	0	0	0	0	0	0	0	0	0	0	0	0	0	0	0	0	0	0	0	0	0	0	0	0	0	0	0	0	0	0	0	0	0	0	0	0	0	0	0	0
DPYD-AS2	0	0	0	0	0	0	0	32	6	0	0	0	0	0	0	0	0	7	19	7	0	2	57	0	0	6	6	0	2	12	15	5	0	4	0	0	0	22	1	9	28
MIR137HG	0	0	157	0	0	0	320	0	70	0	0	0	0	0	0	0	106	14	1	0	0	0	0	0	0	0	0	0	0	0	0	0	0	0	14	4	0	0	0	0	0
MIR2682	0	0	0	0	0	0	0	0	0	0	0	0	0	0	0	0	0	0	0	0	0	0	0	0	0	0	0	0	0	0	0	0	0	0	0	0	0	0	0	0	0
MIR137	0	0	0	0	0	0	0	0	0	0	0	0	0	0	0	0	0	0	0	0	0	0	0	0	0	0	0	0	0	0	0	0	0	0	0	0	0	0	0	0	0
PLPPR5	0	0	0	0	0	0	0	0	0	0	0	0	0	0	0	0	0	0	0	0	0	0	0	0	0	0	0	0	2	0	0	0	0	0	0	0	0	0	0	0	0
LINC01708	0	0	0	0	0	0	0	0	0	0	0	0	0	0	0	0	0	0	0	0	0	0	0	0	0	0	0	0	0	0	0	0	0	0	0	0	0	0	0	0	10
FRRS1	0	0	154	0	115	0	105	0	32	0	18	0	0	78	326	0	64	24	78	10	62	9	111	11	26	30	289	0	718	24	65	4	203	74	163	148	32	136	807	18	18
AGL	426	804	1067	1908	1867	724	829	987	1893	882	1068	1789	698	788	1035	1371	44	1677	1443	1374	577	1643	1223	1199	1123	1095	1694	1662	2756	809	1172	1157	1694	1635	1308	1270	2003	2078	3246	1464	925
SLC35A3	957	824	1129	1231	942	1118	730	1066	3036	1051	1738	1575	164	346	1034	1454	46	1085	753	532	269	850	580	1031	812	1208	1100	965	727	711	908	463	493	733	484	868	1091	1736	2663	888	464
SASS6	579	556	1322	1165	1202	463	491	656	1452	633	561	350	1052	522	154	550	349	1006	1660	847	604	1095	1012	890	1205	1158	1259	696	637	535	1308	512	759	1657	3145	1245	2472	4396	2225	600	981
TRMT13	412	2091	1757	4133	1278	2008	591	2277	2085	1825	678	2758	16	1661	1250	3000	795	3140	1223	2597	777	2445	1077	2939	1257	2749	1054	5964	1962	1446	2392	1058	1130	2699	4351	1764	2444	4446	1324	2495	723
LRRC39	26	27	23	13	7	4	2	2	67	109	0	122	0	166	0	65	0	108	74	54	12	99	27	64	17	115	2	250	79	44	58	37	31	38	103	60	72	117	15	82	34
RTCA-AS1	28	111	0	117	17	71	28	118	229	0	22	75	0	121	57	166	0	66	57	53	18	59	46	137	70	58	77	100	70	30	46	6	47	98	73	6	80	88	19	27	27
RTCA	3280	2324	4214	1882	3864	1964	3523	2601	12119	1341	8130	3189	2679	1397	4639	2611	3302	1231	2886	817	898	940	1215	880	1484	628	977	1713	3619	758	2149	933	1427	2125	2073	2070	2467	6070	3147	523	990
MIR553	0	0	0	0	0	0	0	0	0	0	0	0	0	0	0	0	0	10	5	3	2	1	3	7	2	5	0	0	14	0	2	0	6	2	2	0	2	4	2	3	1
GPR88	0	0	0	26	0	0	0	0	0	0	0	0	0	0	0	0	0	0	0	0	0	0	0	0	0	0	0	0	0	0	0	0	0	2	0	0	0	0	0	0	0
LINC01349	0	0	0	0	0	0	0	0	4	0	0	0	0	0	0	0	0	0	0	0	0	0	0	0	0	0	0	0	0	0	0	0	0	0	0	0	0	0	0	0	0
EXTL2	610	184	5483	237	6476	224	3411	360	8310	661	2244	629	1014	403	4799	291	2661	163	3260	85	1470	239	2095	322	848	172	4243	120	9707	100	2179	85	1279	4800	4561	2978	1445	6229	2503	164	973
SLC30A7	901	1982	1708	1342	1609	801	965	1004	2650	1383	1548	1640	370	528	1859	1239	612	8027	8522	4131	1745	7639	2893	5751	4019	3960	3735	6583	17373	2061	5750	3377	3215	4802	4492	1358	4632	12522	2996	3421	3488
DPH5	1131	872	3470	1933	2541	1007	1754	1114	1934	721	1345	1997	2342	1001	638	1480	782	1385	1483	1384	1751	1207	1071	1052	1477	756	1505	1275	4157	1041	1714	1263	989	1450	2554	2158	3180	4266	2242	854	1295
LOC102606465	441	2737	1662	2555	354	1433	315	1793	209	1299	882	2642	0	1844	229	2123	0	1316	356	1560	213	1124	177	689	289	1388	306	1355	619	1052	303	927	108	386	508	222	760	359	32	604	92
LOC101928370	0	497	337	550	36	585	1334	760	1084	346	217	1170	0	349	132	796	285	107	160	206	45	128	4	67	197	248	12	12	0	156	51	33	19	54	214	126	2	104	37	89	0
S1PR1	296	14627	2676	6735	58	4275	7722	8941	8334	16837	2735	14889	392	2574	2149	12315	1804	5320	2860	8973	296	4501	319	1206	5397	3966	604	3657	472	3415	822	5295	598	1311	2612	2844	185	6158	1369	2302	1215
LINC01307	0	0	0	0	0	0	0	2	5	0	0	0	0	0	0	0	0	0	0	0	0	0	0	0	1	0	0	0	0	0	0	0	0	0	0	0	0	0	0	0	0
DNAJA1P5	0	0	0	0	0	0	0	0	0	0	0	0	0	0	0	0	0	0	0	0	0	0	0	0	0	0	0	0	0	0	0	0	0	0	0	0	0	0	0	0	0
LOC101928436	0	0	0	0	0	0	0	0	0	0	0	0	0	0	0	0	0	0	0	0	0	0	0	0	0	0	9	0	0	0	0	0	0	0	0	0	0	0	0	0	0
AMY2B	149	248	19	804	30	452	0	1063	30	880	285	710	0	1625	198	682	0	1205	199	494	78	971	51	1289	267	732	3	1333	1471	389	236	491	125	357	53	172	152	161	95	874	149
ACTG1P4	18	22	4	8	10	0	4	100	20	8	16	82	29	0	52	2	7	7	12	10	0	38	0	39	3	94	0	62	65	6	9	2	0	2	0	6	0	0	12	16	4
AMY2A	2	1	0	7	0	4	0	11	0	13	1	1	0	23	4	5	0	1	0	3	0	1	0	5	0	1	0	0	0	10	0	7	3	0	0	0	0	0	0	5	1
AMY1B	4	0	0	12	0	16	0	12	0	22	6	12	0	22	2	18	0	2	0	2	0	6	0	10	0	2	0	0	2	2	2	2	2	0	0	2	0	0	0	4	0
AMY1C	0	0	0	0	0	0	0	0	0	0	0	0	0	0	0	0	0	0	0	0	0	0	0	0	0	0	0	0	0	0	0	0	0	0	0	0	0	0	0	0	0
LOC100129138	26	34	22	24	22	18	30	16	20	32	26	28	8	26	10	40	0	2	80	2	4	2	6	2	2	0	0	4	14	0	4	4	4	8	6	2	4	0	0	2	0
LINC01676	0	0	0	0	0	0	0	0	0	0	0	0	0	0	0	0	0	0	0	0	0	0	0	16	0	0	0	0	0	0	0	0	0	0	0	0	0	0	0	0	0
PRMT6	1700	2365	897	1134	2810	1114	2015	1704	2190	2042	1498	1062	3300	936	1989	1603	3910	201	188	124	314	176	150	193	485	82	450	51	426	271	491	138	438	2	1336	3031	571	1178	2085	166	890
MIR7852	0	0	0	0	0	0	0	0	0	0	0	0	0	0	0	0	0	0	0	0	0	0	0	0	0	0	0	3	0	0	0	0	0	0	0	0	0	0	0	1	0
SLC25A24	844	2821	416	1977	0	1184	2	1149	794	1596	576	2451	0	881	880	1554	0	1235	299	1169	22	1610	202	887	504	644	0	1809	1238	752	196	975	292	2644	4	0	0	2556	4218	903	362
NBPF4	0	38	0	0	0	0	0	0	0	0	125	0	0	203	0	0	0	2	0	0	0	7	4	6	0	0	0	0	0	0	0	0	0	0	0	0	0	0	0	0	0
NBPF6	0	5	0	0	0	0	0	0	0	0	20	0	0	24	0	0	0	0	0	0	0	3	7	0	0	0	0	0	0	0	0	0	0	0	0	0	0	0	0	1	0
FAM102B	353	196	0	428	0	111	6	219	70	427	300	361	0	418	2	323	0	932	183	543	24	880	461	714	425	847	178	634	438	423	110	449	139	391	2147	3286	1972	4129	6937	242	156
HENMT1	4799	727	0	1315	0	408	62	799	824	735	2101	998	0	236	0	1286	0	328	185	312	629	411	812	532	180	195	2	515	2002	258	892	390	334	446	2	0	3495	3097	1420	374	360
PRPF38B	6202	7360	5425	10916	7850	11152	3251	9715	8966	10807	5146	10037	2160	7216	3239	9798	7116	7966	6917	7090	2760	4351	2983	8755	4329	7313	3448	10670	10025	4510	9493	5958	2445	3106	3761	5198	3208	6821	5598	5694	4436
FNDC7	0	16	0	0	0	0	0	22	0	0	0	0	0	0	0	0	146	19	5	0	1	13	0	24	0	20	1	2	0	2	5	7	0	6	0	2	9	15	0	0	0
AKNAD1	18	0	0	0	0	0	0	0	0	0	0	0	0	0	0	0	0	2	3	0	4	0	0	1	4	0	0	0	0	0	0	0	0	0	0	0	0	2	0	0	0
SPATA42	0	0	0	0	0	0	0	0	0	0	0	0	0	0	0	0	0	0	0	0	0	0	0	0	0	0	0	8	0	0	0	0	0	2	0	0	0	0	0	0	0
CLCC1	3038	1372	2130	1172	1218	1029	1035	800	3492	829	3071	1187	2441	810	1783	1068	1211	1105	1686	828	499	991	748	804	1719	761	626	1197	3918	672	2239	607	1163	2829	1564	1019	1596	2191	967	747	723
TAF13	144	1	119	78	106	30	122	30	192	90	206	192	52	104	0	19	126	169	235	147	241	95	145	103	123	200	433	74	563	178	159	229	150	222	257	253	158	378	271	102	49
TMEM167B	1526	3322	1642	3557	803	3082	1210	3950	2946	4168	1513	4149	1280	814	1307	3625	171	6737	2112	2985	516	3787	987	2376	1792	1998	1714	2352	5293	1964	1913	4832	884	2344	1379	1152	1957	3158	1920	3202	502
SCARNA2	246	434	98	817	138	790	112	625	199	676	140	530	0	503	86	1177	22	44	10	48	0	70	4	288	45	62	16	107	22	54	34	4	76	0	9	29	8	19	34	38	8
C1orf194	0	0	91	18	14	0	6	12	165	0	162	29	0	0	0	24	0	6	71	0	26	7	4	9	7	21	0	0	80	0	7	0	39	1	0	4	5	3	4	1	0
SARS	13862	14538	16180	14639	14475	11380	10992	19842	34043	11287	18847	24071	11896	10610	9788	15880	11961	9880	11998	8340	4471	7749	9282	7882	5456	5863	9207	7543	15598	5417	16439	6238	6218	16896	5686	4693	11635	26655	8314	5805	2820
CELSR2	176	0	0	0	0	0	107	38	66	0	62	0	0	0	154	29	0	2	36	2	0	6	2	6	89	0	48	0	0	12	251	0	52	28	60	636	402	83	318	18	6
PSRC1	1424	2	1730	22	182	164	1065	92	1434	0	693	0	978	204	798	0	3366	0	166	0	26	16	219	4	175	0	0	4	240	2	111	0	211	339	192	256	972	970	1083	0	36
SORT1	1750	0	0	0	94	0	0	98	1346	0	632	0	2024	0	0	0	4	0	1431	2	289	2	13	4	924	0	10	6	372	0	572	0	322	154	683	1728	940	2317	4410	2	698
PSMA5	15415	9983	45258	10458	30260	5837	17772	9689	59426	4946	23553	9549	24128	3520	15985	7990	20422	3283	16658	3084	9704	3572	9510	3863	6774	2435	16220	5734	26761	3446	15626	3996	9120	10593	7652	5535	16591	26936	7196	2745	8712
SYPL2	0	0	0	0	36	0	8	0	0	0	0	0	0	0	0	0	0	0	66	2	110	0	7	9	80	0	45	0	0	0	303	0	0	4	0	2	0	3	4	0	449
ATXN7L2	2958	862	53	888	1499	911	1886	1857	2796	2358	2036	717	202	3075	3432	1873	4719	91	274	112	150	92	38	184	261	151	190	200	78	188	992	183	105	113	61	605	265	362	384	83	220
CYB561D1	920	905	225	440	359	799	142	1165	843	791	693	1948	1423	948	271	1596	159	359	298	301	75	246	99	417	225	201	98	563	539	327	556	95	111	166	43	433	224	320	732	104	40
AMIGO1	20	0	0	0	0	138	0	0	292	0	0	0	0	0	396	0	0	0	31	0	12	0	0	17	7	15	0	0	130	2	64	0	0	2	0	2	0	0	21	2	40
GPR61	0	0	0	0	0	0	0	0	0	0	0	0	0	0	0	0	0	0	2	6	0	0	0	8	0	0	8	0	0	0	22	0	0	2	0	0	0	0	1	2	0
MIR197	0	0	0	0	0	0	0	0	11	0	0	0	0	0	0	0	0	6	14	6	0	7	2	5	3	6	0	0	0	2	19	10	0	6	0	1	4	9	0	9	8
GNAT2	0	18	0	8	66	0	89	0	86	0	136	2	0	40	0	2	5	41	198	16	104	42	26	50	27	33	75	93	583	11	93	13	20	44	26	8	78	85	33	20	12
AMPD2	4082	3178	2450	2011	3999	2090	2741	3466	6404	2905	7502	3256	2962	3155	3030	4736	4671	648	719	295	533	644	202	727	989	380	227	1640	2152	411	1360	533	362	364	423	3402	604	978	2358	334	289
GSTM4	2516	1194	754	2283	4139	1104	2228	1885	5141	1847	992	1259	334	1272	1778	1462	2271	245	769	285	1179	517	474	845	481	271	1274	47	630	401	1044	308	684	876	550	632	1803	722	427	342	207
GSTM2	1243	19	0	903	449	368	582	891	207	1151	150	624	2	409	623	519	408	241	467	204	210	298	66	817	510	303	3	363	122	259	1062	251	80	21	12	97	23	122	158	379	150
GSTM5	10	2	0	3	11	1	6	5	7	5	0	1	0	3	0	25	11	0	1	0	1	0	0	114	5	96	0	0	2	0	0	1	0	0	0	6	11	0	0	14	0
GSTM3	1464	0	0	330	24	372	0	354	0	491	48	215	0	0	0	92	0	121	142	29	18	120	0	666	68	59	0	6	78	20	0	192	24	0	0	0	0	0	0	16	0
EPS8L3	0	0	0	0	0	0	0	0	0	0	0	0	0	0	0	0	0	0	0	0	0	0	0	0	0	0	0	0	1	0	0	0	0	0	0	0	0	0	0	0	0
CSF1	4427	0	9571	40	761	556	7275	238	22723	687	9152	64	33669	532	19474	274	11313	16	684	35	1161	18	4325	15	1187	18	587	6	4979	34	1178	40	393	965	348	3175	2056	2455	18117	48	48
AHCYL1	4176	5584	10062	4358	39552	2753	23162	6517	46861	3838	29069	6813	24386	4549	40752	7137	22699	2170	48677	1681	19454	1519	8175	1714	7711	1581	19905	2479	80932	1571	72367	2139	14460	28809	2823	5316	4635	6669	13142	1685	1780
STRIP1	1853	3291	1573	1541	1753	1975	2428	3478	4920	3383	3312	2501	469	2078	2654	4210	1482	2881	1846	1239	479	1563	509	1917	1213	1294	770	2752	4101	949	2946	1772	839	1090	510	889	809	1360	2705	1023	552
ALX3	0	4	13	38	108	122	9	18	28	25	147	0	0	0	0	38	96	15	28	23	31	28	19	36	23	5	73	89	103	17	82	16	0	45	7	171	9	71	130	18	1
LINC01397	0	0	0	0	0	0	0	0	0	0	0	0	0	0	0	0	0	2	2	0	0	1	0	0	5	0	22	4	1	0	11	0	1	9	0	0	11	0	2	0	0
UBL4B	0	0	0	0	0	0	0	0	0	0	0	0	0	0	0	0	0	0	0	0	0	0	0	0	6	0	0	0	0	0	10	0	0	2	0	0	23	0	0	0	0
SLC6A17	0	0	0	0	0	0	32	20	310	0	0	0	0	0	0	0	0	0	84	2	0	0	0	0	0	0	0	6	4	2	148	0	0	1	0	0	0	0	0	2	0
KCNC4-AS1	0	17	75	8	0	48	0	40	241	76	33	0	0	46	0	72	0	13	16	18	0	24	0	12	75	10	83	0	0	12	35	2	58	122	44	28	2	0	0	2	0
LOC440600	101	96	3	134	123	102	88	195	86	147	86	349	0	0	0	224	80	92	68	74	12	34	17	59	26	48	6	65	75	71	117	43	33	74	20	12	69	19	50	27	9
SLC16A4	27	330	0	81	199	0	144	119	2	48	1761	226	0	0	0	210	172	355	2631	115	37	241	149	193	118	122	224	426	697	65	197	54	74	201	52	11	3346	192	57	153	47
LAMTOR5	18089	18575	15328	18041	16991	7906	12671	13840	25715	15063	24686	11098	14968	11395	14443	11592	11053	5602	8639	5758	3770	3678	4379	3239	4062	4990	11251	7188	18403	6981	5776	8830	5378	10152	4622	3006	10604	10914	3139	3802	1477
LAMTOR5-AS1	42	87	105	17	32	89	27	15	46	77	87	21	0	150	91	66	0	22	24	21	43	5	8	13	18	55	138	64	70	9	35	17	27	52	16	10	121	69	24	19	5
PROK1	0	0	0	0	0	0	0	0	0	0	0	0	0	0	0	0	0	0	0	4	0	0	0	0	0	0	0	0	0	0	0	0	0	0	0	0	0	0	2	0	0
CYMP	0	0	0	0	0	0	0	0	0	0	0	0	2	0	0	0	0	0	1	0	0	0	0	0	0	0	82	0	0	0	25	0	0	0	0	0	0	0	0	0	0
CYMP-AS1	0	0	0	0	0	0	13	0	0	0	0	0	0	0	0	0	0	0	11	0	0	0	0	0	0	0	66	0	0	0	19	2	0	0	0	0	0	0	0	0	0
KCNA10	0	1	0	0	0	0	0	0	1	0	1	0	0	0	0	0	0	0	0	0	0	0	0	0	0	0	0	0	0	0	0	0	0	0	0	0	0	0	0	0	0
KCNA3	1512	2529	1244	2821	2251	2163	2633	3024	12310	2595	3129	2358	24	2000	3678	2918	3059	1838	5634	1790	979	1937	2279	561	2766	1401	2259	1947	1566	1312	795	1254	2220	3806	639	886	8	40	12	1118	3309
CD53	13682	124368	14999	96140	196	45283	7638	83290	36452	62313	17840	86287	10338	49657	5384	102731	13455	64932	5407	61285	1892	56200	2352	36554	5563	36013	7355	83058	18660	39023	15324	49054	11581	14232	6424	5157	264	634	128	45799	9441
LRIF1	2651	4774	3967	4373	4557	2873	2354	3624	5244	3290	3818	5689	2260	2493	4097	4696	2002	3134	3506	3534	2616	4031	3437	2807	2786	3434	4203	6144	13976	2087	4513	2402	2216	7044	3141	1272	2716	1939	1243	2717	1627
CEPT1	1518	8071	142	10411	1516	4692	1216	9353	3138	4052	1337	7320	918	1893	1723	7127	1144	9398	4570	7885	1409	9857	2158	7740	1776	7371	1220	12413	4711	7276	3110	4900	1640	3510	2092	1017	2160	2800	1081	4837	1562
DENND2D	13123	15641	1564	11457	1437	8543	3337	11570	2078	11053	4654	14076	6186	5322	3543	15962	2602	5358	8228	5354	4595	4447	163	5452	2968	2846	1138	5298	4412	2698	2716	4337	1187	3488	53	6	393	26	1	3681	393
CHI3L2	38836	23960	10	36845	874	9504	310	31231	1162	33742	12957	86469	3486	9619	594	14683	240	11208	6722	11647	10950	11045	1836	611	1151	12313	3515	14150	2385	5982	1326	194	302	260	109	10	36	12	12	20205	442
CHIAP2	0	0	0	0	0	0	0	0	0	0	0	0	0	0	0	0	0	0	0	0	0	0	0	0	0	0	0	1	0	0	0	0	0	0	0	0	0	0	0	0	0
CHIA	0	0	0	0	6	16	0	0	0	0	0	0	0	0	0	0	0	0	10	0	28	30	0	54	0	0	0	0	0	0	0	0	0	0	0	0	0	0	0	0	0
PIFO	119	68	0	14	0	18	0	32	0	47	0	0	0	2	0	8	0	47	163	21	71	22	18	72	42	142	0	2	70	12	132	2	27	6	0	0	0	11	0	33	71
PGCP1	0	0	0	0	0	0	0	0	0	0	0	0	0	0	0	0	0	0	0	0	0	0	0	0	0	0	0	0	0	0	0	0	0	0	0	0	0	0	1	0	0
OVGP1	232	203	76	444	95	710	24	458	0	72	261	486	0	244	0	583	0	269	110	191	60	160	60	403	68	126	14	301	298	224	524	184	80	126	51	166	23	75	44	340	68
WDR77	6468	10221	13812	7721	7258	5235	7133	7326	13154	3826	8424	7114	6705	3189	5635	7756	8695	1383	1613	1216	602	1321	1216	1728	1409	1011	1746	1997	2009	783	1990	1232	937	1809	1833	3486	2574	5252	3536	985	1546
ATP5F1	18993	14352	33853	16160	22009	7580	19792	15892	32361	8856	21775	19608	11144	5590	13346	13295	15967	9253	16356	10165	12025	11647	10418	8491	10046	7957	16327	11649	21080	6679	14508	10743	9910	21884	11798	6017	17481	51580	12050	7722	3886
C1orf162	1341	24430	499	23754	133	16263	58	17394	515	20200	148	28357	720	11993	6	22608	213	8151	533	13076	159	8399	79	7408	78	13136	132	10209	538	8562	84	10265	106	13393	10	41	82	103	62	6195	12
ADORA3	0	53	0	0	28	0	181	0	0	0	0	0	0	0	0	0	0	0	70	2	1	4	80	0	2	0	0	0	109	2	6	36	27	549	0	2	225	211	68	2	25
LINC01160	54	56	299	20	431	72	835	54	953	36	877	0	2158	193	925	44	1074	18	703	14	450	43	471	3	238	78	392	21	1298	11	428	15	260	827	117	35	286	645	428	4	41
FAM212B	132	310	962	79	1227	216	277	142	2012	151	314	304	0	0	0	142	546	3	96	20	108	24	113	58	273	178	62	9	108	12	340	10	62	109	2	58	226	301	846	2	66
FAM212B-AS1	24	5	42	4	0	21	65	0	0	11	0	0	0	0	0	0	46	2	0	0	1	0	1	0	1	0	0	0	0	0	10	0	1	23	0	0	6	10	1	0	4
LOC101928718	0	11	20	53	0	118	9	37	0	9	45	266	0	0	0	17	0	5	10	13	11	13	5	71	0	37	2	16	26	7	8	21	3	21	0	0	0	15	4	24	5
DDX20	2215	2759	2597	2292	2069	3527	1741	1068	3965	5055	2783	2916	2297	2491	2582	2459	5117	1074	1034	746	414	687	800	993	895	864	2117	1661	610	623	2363	967	668	1142	1013	1426	1178	2229	2725	417	1761
KCND3-IT1	0	0	0	0	0	0	0	0	0	0	0	0	0	0	0	0	0	0	0	0	0	0	0	0	0	0	0	0	0	0	0	0	0	0	0	0	0	0	0	0	0
KCND3-AS1	0	0	0	0	0	0	5	0	52	0	0	0	3	0	0	0	0	0	26	0	0	0	38	0	51	0	0	1	304	0	256	0	95	0	0	0	0	0	0	0	47
LINC01750	0	0	170	0	284	0	267	0	532	0	0	2	1152	0	0	0	0	0	2	0	0	0	31	0	16	0	8	0	2	0	101	2	231	0	0	0	8	0	0	0	28
MIR4256	0	0	0	0	0	0	0	0	0	0	0	0	0	0	0	0	0	0	1	0	0	0	0	0	0	0	0	0	9	0	1	0	0	3	0	0	2	2	0	4	0
WNT2B	10	0	0	8	0	57	0	168	0	62	0	122	0	0	0	141	0	17	49	17	9	20	0	5	32	2	0	0	0	4	1	0	14	59	0	8	6	5	6	8	0
CAPZA1	6909	12829	5088	10388	8642	2442	4110	14090	28996	5245	4578	11761	8678	3614	6475	7869	3494	49388	60007	31081	17501	71500	32007	31434	35615	30932	43268	54022	156482	24919	51314	68920	46165	76205	31979	7886	41811	124505	22886	21849	41385
MOV10	8165	3028	1592	1680	611	2762	110	2270	2099	1772	2572	1558	304	1904	2863	4441	1678	679	895	943	483	783	524	985	1364	96	36	1203	1098	492	330	622	1580	2779	1187	3288	2233	3023	3213	691	402
PPM1J	116	207	0	628	42	559	0	356	0	98	0	163	0	676	0	451	0	0	0	26	0	27	0	49	0	66	0	0	0	22	2	0	0	5	6	12	2	0	4	10	0
FAM19A3	0	3	0	0	0	0	0	0	0	0	621	0	0	0	0	0	0	0	0	0	0	0	0	0	0	0	0	0	0	0	14	0	0	40	0	2	6	0	0	0	0
SLC16A1	1612	412	2108	382	6082	1906	5232	270	3380	1406	1238	1161	220	174	2825	752	5221	700	1674	285	815	565	3807	322	3008	482	2943	366	2341	288	5371	747	2265	10109	8031	5584	10949	25718	10856	197	3147
AKR7A2P1	64	74	36	24	30	36	26	58	30	64	50	20	6	16	26	42	20	7	41	6	10	2	6	19	2	10	0	0	2	6	3	2	2	0	14	0	13	8	10	8	4
SLC16A1-AS1	531	651	954	978	1198	596	541	951	1614	686	1357	1045	686	315	762	1175	834	162	144	140	84	111	128	340	111	109	301	299	170	214	320	83	134	199	55	45	187	288	122	83	34
LOC100996251	8	109	113	98	46	14	1	55	31	64	5	99	6	11	0	70	18	356	200	116	46	233	128	336	65	349	282	507	860	121	151	61	184	352	110	15	161	223	49	148	31
LOC643441	0	0	0	0	0	0	0	0	0	0	0	0	0	0	0	0	0	0	3	0	2	0	0	0	0	0	0	9	1	0	0	0	0	0	0	0	0	0	0	0	0
RSBN1	5996	4388	1602	5313	3510	5810	4509	6792	5560	7613	4237	5672	2942	5304	3149	5276	3625	3312	1776	2873	431	3519	1613	3563	1122	4279	1243	2715	6060	2211	2166	2248	1374	2462	698	477	2075	2607	1684	2342	1185
PTPN22	2465	6536	87	3677	939	2163	1440	4587	994	2430	1209	4872	176	2227	0	6732	139	6438	2107	3434	874	5381	1432	4105	779	2631	714	4946	1540	1622	113	1826	927	1596	679	213	976	2755	1120	2997	257
AP4B1	1382	3549	1600	4282	1827	3239	1479	2724	2597	3296	1109	2648	843	1399	2024	4565	174	2544	903	1114	666	1377	745	1514	654	1608	712	3755	2194	1127	1332	1336	910	837	718	913	1102	2107	1060	838	540
DCLRE1B	1008	549	450	224	1269	326	1087	751	1870	441	234	440	0	0	728	584	922	291	921	247	386	193	744	317	687	162	663	2	540	138	577	87	528	1133	751	828	1032	2462	2858	162	536
HIPK1-AS1	571	147	336	544	284	342	586	670	419	187	253	211	47	332	6	267	0	164	85	48	55	51	16	242	102	295	243	214	354	32	175	87	50	89	6	4	117	81	24	61	0
HIPK1	975	1038	552	1319	1580	921	428	837	755	1623	578	555	4	717	477	422	1406	3780	4696	1880	722	2013	1260	1539	1663	2456	1247	1276	10455	1288	2006	2091	966	2257	920	1404	1493	12120	21897	2279	1377
OLFML3	0	4	0	0	0	0	0	0	0	0	0	0	0	0	0	0	0	14	32	0	0	0	0	0	8	0	0	2	0	0	0	0	0	4	0	0	0	25	5	0	0
BCAS2	12553	5575	8541	11990	6317	13188	6864	10871	12009	17377	9892	8508	5958	9259	5406	7842	4866	11003	6917	10044	2782	4796	2864	5582	3443	12545	7609	4864	9366	5688	4388	21150	3326	6673	3951	1326	8047	13785	2165	6065	1082
AMPD1	0	0	0	0	0	1	0	0	0	0	0	0	0	0	0	0	0	0	0	0	0	0	0	0	0	0	16	0	0	0	0	0	0	0	0	0	0	0	0	0	0
NRAS	2768	1980	2155	1990	3430	968	2015	772	4435	2599	2285	1083	310	1716	1961	1818	3503	7845	11828	4501	3374	6474	6427	2432	6418	2233	5471	3533	20892	1770	10305	2795	4490	13143	7104	3422	11296	34378	16395	2741	6315
CSDE1	18266	22479	7691	14558	13361	17516	13690	23808	17123	27416	14002	23433	4560	9218	14457	25486	12017	28680	35307	19319	13898	16490	12646	15321	20457	14816	17342	11470	47386	8455	24123	12668	8327	32251	14652	12161	27813	74287	41064	16224	16223
SIKE1	2652	3211	2650	3186	3043	1842	2504	2835	5873	3560	2414	3325	916	1925	3160	2650	3273	1794	2291	1699	1069	1239	2568	1784	1997	2251	2687	1798	8978	1202	3235	1233	1520	3068	2210	1911	3475	6205	4938	1525	1718
TSHB	0	0	0	0	0	0	0	0	0	0	0	0	0	0	0	0	0	0	0	0	1	0	0	0	18	0	0	0	77	0	0	0	0	0	0	0	0	3	0	0	15
VANGL1	1556	58	0	2	424	0	426	0	608	140	404	0	824	0	46	0	0	8	771	2	42	6	24	0	333	22	130	9	6	0	250	18	387	1894	6	0	13	0	0	2	0
NHLH2	0	0	0	0	0	0	0	0	0	0	0	0	0	0	0	0	0	10	0	0	0	0	0	0	0	0	0	2	0	0	0	0	0	0	0	0	0	0	0	0	0
LINC01649	0	0	0	0	0	0	0	0	0	0	0	0	0	0	0	0	0	0	6	0	0	2	0	0	0	0	0	0	41	0	0	0	0	0	0	0	0	0	0	0	0
LOC101928977	0	0	0	0	0	0	7	0	0	0	0	0	0	25	0	4	0	2	7	1	0	0	0	1	0	0	0	0	9	0	0	0	0	0	0	0	0	0	1	2	0
MAB21L3	0	0	1	0	0	0	0	0	0	0	0	4	0	0	0	0	0	18	83	0	0	3	0	6	20	0	5	28	0	6	1028	0	0	0	0	0	0	0	0	0	0
ATP1A1-AS1	137	624	303	604	2	91	125	620	126	309	195	679	0	561	0	1476	0	251	190	336	69	294	95	229	95	231	77	359	445	218	149	137	235	442	5	2	131	72	26	229	3
LINC01762	0	0	0	20	0	0	0	0	0	0	22	6	0	38	0	0	0	8	6	1	0	7	1	0	10	0	0	0	0	0	0	0	2	15	0	1	2	6	0	5	3
CD58	13264	1439	4321	2839	3118	1431	2090	2688	7476	1738	12905	1210	1895	2875	4828	2769	6220	708	1798	595	1005	1025	2078	1093	5420	653	1535	2127	7980	824	2969	541	2233	3093	1852	1024	6195	8806	2938	431	172
MIR548AC	0	0	0	0	0	2	3	0	0	0	0	0	0	0	0	0	0	2	6	7	1	4	1	2	18	0	0	0	1	3	0	0	3	0	4	2	9	21	2	0	0
MIR320B1	0	0	0	0	0	0	0	0	0	0	0	0	0	0	0	0	0	0	0	0	0	0	0	0	0	0	0	0	0	0	0	0	0	0	0	0	0	0	0	0	0
C1orf137	0	0	0	0	0	0	0	0	0	0	0	0	0	0	0	0	0	0	2	0	0	0	0	0	0	0	0	0	0	0	0	0	0	0	0	0	2	0	0	0	0
PTGFRN	119	0	0	0	0	0	0	0	0	0	8	0	0	0	747	0	0	0	590	0	26	0	0	2	1247	2	0	18	0	0	0	0	4	60	0	4	0	0	0	0	12
TTF2	5158	807	4885	1647	5118	1135	5564	959	9434	1482	7075	1352	4376	2516	7039	1355	6842	1319	4063	613	1968	675	2328	975	6796	598	3190	2437	15305	664	5323	502	2538	2505	1855	1865	2805	3922	6040	804	3994
MIR942	0	0	0	0	0	0	0	0	0	0	0	0	0	0	0	0	0	0	0	0	0	0	0	0	2	0	0	0	6	0	0	0	0	0	0	0	0	0	0	1	0
TRIM45	66	6	0	0	23	0	2	20	6	0	8	69	0	52	36	2	22	74	259	5	44	54	42	168	359	131	56	21	336	30	237	10	154	231	235	225	184	200	117	36	12
LINC01525	0	0	0	0	0	0	0	0	0	0	0	0	0	0	0	0	0	0	0	0	0	0	0	0	0	0	0	0	0	0	0	0	0	0	0	0	0	0	0	0	0
LOC100996263	0	19	0	76	10	59	26	50	0	18	43	9	0	0	0	17	0	2	0	3	0	16	0	32	0	11	7	0	0	40	2	0	0	0	0	0	0	0	0	5	0
FAM46C	2992	7983	2	9367	2268	10144	973	6929	365	28145	2803	7590	104	15497	2	9658	6	47143	10229	24129	850	11203	791	6045	1139	15400	122	7321	1819	6977	451	31692	813	5830	2494	878	1080	208	6	8578	148
GDAP2	1409	1156	254	919	1578	501	796	1371	1292	1319	2035	709	182	1134	946	818	226	2165	2226	1878	372	2242	935	1440	2400	2083	1475	2892	3918	628	2037	1048	558	2052	1318	684	2899	3463	841	1578	962
TBX15	104	0	28	0	0	0	0	0	0	0	0	0	0	0	0	0	0	0	0	0	0	4	6	16	14	0	0	1	0	4	2	0	0	0	0	2	3	0	2	0	0
LOC105378933	0	0	0	0	0	0	0	0	0	0	0	0	0	0	0	0	0	0	0	0	0	0	0	0	0	0	0	0	0	0	0	0	0	0	0	0	0	0	0	0	0
WARS2-IT1	0	0	16	0	0	0	0	0	0	0	0	12	0	0	0	0	0	5	14	3	0	0	2	2	1	20	0	57	18	0	0	0	2	7	0	0	16	2	0	15	9
HAO2-IT1	0	0	0	0	0	0	0	0	0	0	0	0	0	0	0	0	0	0	0	0	0	0	0	0	0	0	0	0	0	0	0	0	0	0	0	0	0	0	0	0	0
HSD3B2	0	0	0	0	0	0	0	0	0	0	25	0	0	0	0	0	0	0	0	0	0	0	0	0	0	0	0	0	0	0	0	0	0	0	0	0	0	0	0	0	0
HSD3B1	0	0	0	0	0	0	0	0	0	0	0	0	0	0	0	0	0	0	0	0	0	0	0	0	0	0	0	0	0	0	0	0	0	0	0	0	26	16	0	0	0
HSD3BP4	0	0	0	0	13	12	0	0	0	0	0	0	0	40	0	22	0	2	0	0	6	0	0	2	2	0	44	0	0	0	14	0	0	0	0	0	0	0	0	0	34
LINC00622	0	0	0	0	0	0	0	0	0	0	0	0	0	0	0	0	0	0	6	0	0	0	2	0	0	0	0	0	0	0	6	0	0	0	0	0	0	0	0	2	20
ZNF697	9	0	0	0	100	0	0	0	36	0	0	0	0	0	0	0	0	0	83	2	16	2	40	0	26	0	0	0	86	0	0	0	8	0	222	242	0	0	0	2	672
PHGDH	9728	480	8523	620	11271	602	9302	1328	1017	290	608	727	1474	1737	11718	459	2894	84	900	35	237	78	170	242	2691	12	156	2	134	68	2	8	2343	0	0	10	2	4480	6855	18	226
HMGCS2	0	0	0	0	0	0	0	0	0	0	0	0	0	0	0	0	0	0	0	0	0	0	0	4	0	0	0	0	0	0	0	0	0	0	0	0	0	0	0	0	0
REG4	1253	0	0	0	0	0	0	0	0	0	0	0	0	0	0	0	0	2	10	0	0	0	3	0	2	0	0	0	0	0	0	0	0	0	0	1	2	50	20	0	6
NBPF7	0	0	0	0	0	0	0	0	0	0	0	0	0	0	0	0	0	0	0	1	0	0	0	0	1	0	0	0	0	0	0	0	0	0	0	0	0	0	0	0	0
ADAM30	0	0	0	0	0	0	0	0	0	0	0	0	0	0	0	0	0	0	0	0	0	0	0	22	0	0	0	0	0	0	0	0	1	0	0	0	0	0	0	0	0
HIST2H2BA	10	12	6	56	10	46	86	68	16	22	14	81	8	32	4	50	66	6	0	0	0	0	0	26	2	2	0	0	0	0	0	0	2	0	0	0	0	0	0	0	0
FCGR1B	0	6	0	0	28	0	0	10	0	0	14	0	0	0	0	0	8	0	0	0	2	0	2	0	4	0	35	0	0	0	0	2	29	0	0	0	0	0	0	0	0
EMBP1	410	501	254	733	44	413	241	652	371	497	275	398	98	566	93	705	182	125	36	102	36	84	2	80	109	263	25	74	20	56	14	98	16	83	46	22	28	67	71	137	12
ANKRD20A12P	0	8	2	0	68	0	2	0	0	0	0	0	0	0	0	0	120	14	27	9	4	4	8	0	3	4	3	0	116	0	39	0	0	251	31	17	0	4	0	4	7
LOC102723769	4	5	0	12	272	5	19	21	0	18	14	3	0	0	0	23	46	9	12	6	1	9	45	8	2	4	0	0	82	0	0	2	0	0	46	12	25	0	0	22	19
FAM72D	230	31	264	92	460	147	535	111	652	53	618	74	207	120	1000	80	1292	8	175	2	122	8	72	18	223	9	349	1	96	8	113	7	130	289	315	388	410	270	298	6	99
LINC01719	0	0	0	2	6	4	10	40	36	0	0	0	0	0	0	97	0	5	13	13	4	2	0	19	10	2	14	7	0	14	23	0	0	7	2	10	9	0	14	15	6
RNVU1-6	1092	173	267	2270	2282	1484	5705	2370	2149	1345	2883	586	555	918	1608	982	3063	254	241	74	292	187	88	1127	275	1405	3778	626	209	508	2421	29	748	22	24	6	88	53	5	803	24
HFE2	0	0	0	0	0	0	0	0	90	0	259	0	0	0	0	0	0	0	25	0	69	0	0	0	4	0	0	0	0	0	25	0	0	0	2	0	11	0	0	0	0
TXNIP	20167	60695	458	75556	6	60187	842	71286	3254	131573	7300	114898	6282	37257	374	97421	32	62447	1524	32167	640	37818	388	37251	4625	30452	1424	87270	9019	22055	3961	25888	1831	11566	22	0	4083	1084	3194	62981	340
POLR3GL	3448	5274	1953	5926	1899	4595	1398	5166	3133	5274	2026	6630	3582	4642	809	7265	1530	2578	1635	1895	1133	2247	751	2923	1146	1941	719	1286	2348	2184	934	1279	1611	2404	1474	1781	1282	555	539	2197	342
ANKRD34A	126	66	0	99	46	121	0	132	234	20	0	78	0	0	0	90	0	22	2	21	9	45	26	15	14	19	103	78	3	50	48	10	85	46	49	234	91	54	214	61	0
RBM8A	14932	9227	20369	11176	14135	8962	14011	11807	21685	13530	19864	13540	9514	11891	16519	8938	14812	11244	14392	11004	12719	6525	8852	7608	10714	9068	15561	5869	10921	7632	11166	17241	14435	11513	17097	6369	17336	19120	2285	12337	4007
GNRHR2	4	14	2	10	12	0	2	6	52	6	0	10	0	0	0	48	0	13	30	5	11	11	3	31	14	13	24	8	31	9	52	0	8	8	17	47	23	18	17	12	0
PEX11B	3966	5572	4750	3058	3635	1382	2572	3080	4286	1952	5558	2153	1280	2568	7241	3488	3030	1462	2904	1833	3233	1724	1583	1250	2347	952	1664	2198	6176	1435	4201	1045	1712	1835	1808	1779	1666	1151	997	2148	1134
ITGA10	2	152	8	42	17	168	53	399	72	53	0	309	0	120	1	1	0	249	4	138	13	134	49	308	22	98	83	28	0	74	188	35	80	57	6	19	40	47	65	165	26
ANKRD35	556	0	0	0	0	40	56	0	0	2	48	0	0	60	0	24	0	0	70	0	6	0	0	6	10	0	0	0	76	16	0	0	6	0	0	0	0	0	0	1	0
PIAS3	1697	2316	749	1331	808	1406	1501	2841	1592	2719	1432	2067	42	982	3253	2135	136	788	786	389	1355	487	275	758	557	218	24	190	651	301	725	239	744	909	772	1960	807	230	814	493	238
MIR6736	0	0	0	0	0	0	0	1	0	0	0	0	0	0	0	0	0	0	1	1	1	0	0	3	0	0	0	0	0	0	0	0	0	0	0	0	0	0	0	0	0
NUDT17	131	265	95	474	85	607	0	803	136	809	213	768	0	191	380	595	0	82	44	81	54	59	24	85	45	78	0	3	0	90	50	23	43	6	54	150	30	9	36	123	88
POLR3C	2162	6020	3134	3911	3768	4259	2364	6188	6373	5308	2581	7023	66	2814	7029	6334	2798	3413	2012	2878	2711	2322	1912	2618	2689	2567	1463	2064	2711	1513	1996	2521	1662	2218	2072	1991	3517	2529	1404	3152	1190
CD160	192	54	0	0	16	0	0	106	78	6	0	0	0	24	27	52	0	77	48	12	31	62	22	78	36	0	6	8	32	39	20	2	29	188	24	61	25	71	13	42	4
GPR89A	874	1233	2455	960	1135	801	1136	759	1096	828	1258	1232	2267	758	3141	1268	1848	415	423	429	457	298	574	391	806	476	460	447	596	542	687	413	960	907	530	141	1148	468	90	420	148
LOC728989	2	228	34	777	0	435	8	406	0	290	0	65	0	174	0	374	0	37	8	399	14	11	0	6	12	8	0	114	1	64	4	12	9	4	44	70	2	0	2	434	1
RNVU1-8	311	11	24	446	419	332	1285	398	594	187	587	18	0	188	183	114	306	23	62	26	71	24	6	68	28	82	703	55	9	73	445	5	161	4	0	0	11	6	1	160	4
NBPF13P	0	0	0	0	0	0	0	0	0	0	0	0	0	0	0	0	0	0	0	0	3	0	0	0	0	0	0	2	0	0	0	0	0	0	2	0	0	0	0	0	0
PRKAB2	145	416	534	713	237	861	73	458	470	380	375	613	0	580	865	511	154	641	426	488	438	496	452	739	932	410	235	461	1768	428	931	436	508	690	651	658	516	597	865	690	123
PDIA3P1	15736	8331	7900	8412	8658	4087	8466	8165	9108	7836	9416	7154	2846	3770	11674	7456	7048	502	906	444	506	1201	893	371	532	1635	2694	2722	3265	478	1332	3609	978	882	637	5171	1446	1715	3558	568	1230
CHD1L	3879	3411	2602	6089	5677	3984	3269	3408	3249	4381	1612	6137	1078	4393	6585	6008	1885	3768	2078	2685	1717	2292	2408	4142	5149	2577	1330	4471	3084	1755	5540	2036	3656	4121	2817	3885	3495	1777	2563	2192	1379
ACP6	899	392	1004	564	1985	246	578	692	1244	462	228	424	1028	699	1631	872	534	118	222	64	8	53	48	154	157	148	340	175	215	90	494	2	210	269	121	270	501	103	176	47	0
GJA5	0	0	0	0	0	0	0	0	0	0	0	0	0	0	0	0	0	0	0	0	0	0	0	0	0	0	0	0	0	0	0	0	0	0	0	0	0	0	0	0	0
GJA8	0	0	0	0	0	0	0	0	0	0	0	0	0	0	0	0	0	0	0	0	0	0	0	0	0	0	0	0	0	0	0	0	0	0	0	0	0	0	0	0	0
PDZK1P1	0	0	0	0	0	0	0	0	0	0	0	0	12	0	0	0	0	0	0	0	0	0	0	0	0	0	0	0	0	0	0	0	1	0	0	0	0	1	0	0	0
RNVU1-7	2	0	0	1	0	1	7	2	0	6	2	0	13	2	0	4	1	0	0	0	0	0	0	3	0	3	1	0	3	0	1	0	0	1	0	0	0	0	0	0	0
LOC100505824	0	0	0	0	0	0	0	0	0	0	0	0	0	0	0	0	0	0	0	0	0	0	0	0	0	0	0	0	0	0	0	0	0	0	0	0	0	0	0	0	0
MIR5087	0	3	42	83	96	55	248	62	124	11	64	2	0	21	88	0	12	0	2	1	21	3	2	1	18	26	214	0	64	0	99	4	43	6	0	2	4	6	0	1	0
RNVU1-1	0	0	0	0	0	0	1	1	0	0	0	0	0	0	0	0	0	0	0	0	0	0	0	3	0	0	1	0	1	0	0	0	0	0	0	0	0	0	0	0	0
MIR6077	0	0	0	0	0	0	0	0	0	0	0	0	0	0	0	0	0	0	0	0	0	0	0	0	0	0	0	0	0	0	0	0	0	0	0	0	0	0	0	0	0
LOC100132057	8	36	52	111	8	16	0	46	27	46	0	68	0	0	0	48	0	40	8	55	7	30	1	55	19	32	3	30	14	4	60	27	12	12	17	4	5	6	2	9	2
RNVU1-3	0	0	0	0	0	0	0	0	0	0	0	0	0	0	0	0	0	0	0	0	0	0	0	0	0	0	0	0	0	0	0	0	0	0	0	0	0	0	0	0	0
LINC01138	18	42	4	8	0	33	0	33	5	6	0	28	4	11	4	10	0	8	1	4	1	19	0	2	2	6	1	6	1	14	1	3	3	1	1	0	2	3	2	3	0
PPIAL4G	5	4	20	0	8	2	9	5	22	1	10	10	9	7	6	5	7	0	1	0	1	0	0	3	0	0	1	0	0	0	0	0	0	0	0	0	0	1	0	0	0
PPIAL4D	5	4	20	0	8	2	9	5	22	1	10	10	9	7	6	5	7	0	1	0	1	0	0	0	0	0	1	0	0	0	0	0	0	0	0	0	0	1	0	0	0
RNVU1-14	3091	385	495	11639	5609	6622	5082	4843	2047	7024	4106	1430	331	5337	2457	4313	2314	967	326	292	1564	531	270	12975	845	7715	6687	1234	651	3571	4808	85	1811	20	27	7	69	86	7	3301	28
NBPF15	427	602	222	773	298	706	159	801	426	923	206	716	223	669	625	906	349	2400	1536	1128	578	905	319	2401	2024	1061	932	783	713	847	1506	848	625	1027	829	476	714	568	198	1625	612
RNVU1-15	637	180	26	1635	499	1942	2341	913	487	1473	1438	447	15	863	584	1364	948	261	156	129	523	128	64	1982	154	2715	3773	297	216	1110	1840	15	652	8	3	0	25	17	0	1264	5
PPIAL4E	0	0	0	0	0	0	0	0	0	0	0	0	0	0	0	0	0	4	0	0	0	0	0	0	0	0	0	0	0	0	0	0	0	0	0	0	0	0	0	1	0
PPIAL4F	0	0	0	2	0	0	0	0	0	0	0	0	0	0	0	0	0	0	0	0	0	0	0	0	0	0	0	0	1	0	0	0	0	1	0	0	0	0	0	1	0
DRD5P2	57	0	0	0	0	0	65	0	22	0	18	0	0	0	0	0	0	0	0	4	0	0	0	0	2	0	0	0	0	0	0	0	3	6	0	0	0	0	0	0	0
LOC645166	330	46	10	12	62	31	16	114	483	53	815	32	300	116	273	78	141	34	226	22	100	26	150	69	597	2	145	85	138	11	31	66	188	16	30	12	156	209	12	31	38
RNVU1-17	0	0	0	1	1	0	3	0	0	0	0	0	1	4	0	1	0	0	0	0	0	0	0	0	0	0	0	6	0	0	0	0	0	0	0	0	0	0	0	0	0
RNVU1-18	269	34	28	531	489	630	1658	444	813	371	828	68	29	107	233	379	444	35	76	23	225	58	46	235	115	486	1820	115	159	150	646	4	272	3	6	0	15	16	1	113	0
FCGR1CP	0	0	0	0	0	0	0	4	0	0	6	0	0	0	0	0	0	0	0	0	2	0	1	0	20	0	1	0	0	0	0	0	2	0	0	0	0	0	0	0	0
FAM72C	16	0	8	1	67	0	14	8	101	0	108	0	4	0	68	2	84	4	66	0	34	2	63	0	72	0	104	0	94	0	30	2	85	82	210	133	156	6	0	4	28
LINC00869	203	321	87	271	42	512	58	471	80	425	51	437	73	292	110	1040	196	63	10	68	19	54	11	68	13	69	66	210	49	70	58	49	139	41	50	69	33	22	17	71	6
FAM231D	41	48	2	89	3	17	0	18	20	25	10	52	0	32	2	58	15	43	16	24	3	20	2	71	9	12	11	82	68	7	0	49	124	22	38	70	34	15	14	42	0
HIST2H2BF	467	512	221	1610	982	1647	1964	2478	645	895	380	1188	342	730	155	1697	875	27	40	29	39	31	96	1496	242	495	324	71	65	96	258	42	388	4	26	40	40	24	52	76	0
FCGR1A	0	16	0	0	0	0	0	46	0	0	1	0	0	0	0	46	0	0	15	0	0	4	0	0	0	2	86	0	0	2	5	2	45	2	1	0	0	0	0	17	0
HIST2H3D	352	204	2	635	443	783	1759	1448	441	380	381	686	356	215	67	611	689	13	18	20	32	8	22	200	85	99	117	58	13	4	254	2	68	5	0	2	0	2	2	17	0
HIST2H4A	49	50	26	66	56	78	94	131	58	12	12	84	72	0	10	74	94	0	1	1	0	3	0	0	2	1	8	0	0	0	3	0	1	2	2	0	0	2	0	0	0
HIST2H3C	28	8	12	11	37	11	108	4	115	2	35	4	3	1	17	1	112	0	0	0	0	0	0	1	0	0	0	0	0	0	0	0	2	0	0	0	0	0	0	0	0
HIST2H2AA3	861	1034	262	2749	679	4328	1718	4500	1405	2665	1873	717	289	2516	2580	2968	7327	2	8	4	2	4	0	17	4	41	15	4	0	0	0	2	10	0	0	2	0	0	0	4	0
HIST2H2BC	40	98	26	313	69	293	163	1010	98	177	12	218	233	68	53	270	42	16	4	18	3	24	4	196	24	268	91	19	13	37	94	8	22	4	16	8	14	21	10	26	0
HIST2H2AA4	937	1083	263	2950	776	4398	1896	4173	1437	2683	1935	828	256	2675	2602	3281	7704	4	4	0	2	4	2	33	4	39	42	4	0	4	12	2	19	3	0	1	0	0	2	8	0
HIST2H3A	30	10	14	6	28	8	96	24	124	2	26	8	4	0	40	6	118	0	0	0	0	0	0	0	0	1	0	0	0	0	2	0	0	0	0	0	0	0	0	0	0
HIST2H4B	66	50	28	84	62	122	112	119	62	30	11	72	54	4	22	82	116	0	1	0	0	0	2	0	0	1	6	0	0	0	7	0	0	0	1	0	0	2	0	0	0
HIST2H2BE	1830	2703	795	8223	4384	8720	5964	14601	4947	3031	4009	2654	3629	4932	8338	8622	13338	787	840	464	664	376	86	5368	1407	1699	828	200	1875	360	3280	138	514	140	66	204	146	132	278	1141	104
HIST2H2AC	1749	1239	256	3729	2498	5062	4358	5158	2408	4004	2483	1716	359	1478	1211	4424	2660	53	23	71	154	18	159	835	501	672	463	269	52	148	494	76	565	25	39	95	22	44	33	73	32
HIST2H2AB	419	443	0	711	230	781	301	855	163	491	201	371	484	308	19	1072	94	12	10	20	6	19	30	645	71	197	180	109	1	56	39	19	63	14	4	6	5	8	2	48	0
BOLA1	1601	2266	538	1199	603	964	196	1843	806	1018	980	1634	826	290	1434	1782	616	38	0	40	54	42	10	117	56	64	0	8	60	104	140	62	18	293	0	2	54	45	99	38	14
SV2A	552	0	148	0	118	120	155	48	0	0	18	0	188	0	0	0	0	3	590	6	399	2	36	29	73	75	0	4	167	0	139	0	18	0	40	13	4	2	8	0	0
SF3B4	15708	8881	11562	5309	7013	4368	10277	6319	17820	9467	13057	7129	4832	3669	12560	6835	6104	1221	2460	841	2047	1231	981	1480	3547	982	1782	1245	3433	1347	4119	2551	1694	1211	2549	11399	1981	2016	3186	456	287
MTMR11	1646	25	0	59	48	135	111	82	215	0	54	91	0	0	0	79	244	17	718	26	67	15	13	70	126	26	128	162	138	24	3820	6	37	54	216	160	137	45	7	12	0
PLEKHO1	11798	17731	864	17546	2552	12510	3533	20049	4472	16588	5227	19186	7198	12541	8004	22954	2982	1161	136	1352	125	1020	6	2979	147	1536	10	2035	25	1912	699	2353	136	741	191	2375	344	11	8	1225	604
LOC105371433	108	306	0	391	13	249	123	315	120	339	104	267	0	118	65	173	0	109	34	143	58	120	70	228	5	196	53	132	0	198	9	149	0	23	71	21	8	7	3	61	57
ANP32E	6003	3142	6153	4285	4981	2834	3224	4725	10169	2423	6466	4170	5718	1745	8372	3046	5573	18849	28356	7422	11288	27494	13829	15602	75624	12714	23175	21858	52214	6376	37356	22608	22820	69851	56094	10258	50067	84117	11415	6464	18636
CA14	16	26	0	102	0	4	0	2	0	126	81	40	0	22	2	24	0	123	65	42	49	49	8	86	21	25	1	124	23	31	28	10	18	24	21	49	61	3	6	39	20
APH1A	1627	5059	682	2900	2857	2032	1552	3259	2957	5983	1131	4804	16	802	1390	3702	2859	2772	1784	1608	752	2349	1535	2099	2197	2806	1502	1901	4227	1788	2662	1223	1741	1603	1658	7713	1724	2053	3175	1691	391
C1orf54	704	47	117	35	106	74	48	163	95	115	162	44	478	136	0	90	203	35	79	25	98	23	91	49	41	32	162	120	22	6	175	43	56	3	682	476	319	46	27	40	803
CIART	134	0	0	70	0	154	32	0	0	107	0	32	0	0	250	0	0	0	22	0	30	0	0	0	14	0	0	42	168	0	93	24	40	30	40	515	16	8	8	0	182
MRPS21	8760	8725	16144	8979	7655	5410	5488	10707	7691	7193	6897	9461	9515	9750	16846	9731	6706	5593	4638	5789	1653	4295	5846	6268	7059	6001	12678	7291	2226	7031	2586	6201	7616	7773	10368	5232	3657	6318	1551	4563	1775
PRPF3	2151	4005	1512	4923	1549	3769	2779	5788	4296	2809	4493	6432	1034	3346	2386	5306	1005	4992	3724	3478	1931	3074	2053	4122	4580	3107	1428	6685	6265	1668	3287	1644	3268	2132	2376	2701	2354	3127	1970	2241	1825
MIR6878	0	2	0	6	0	2	1	0	0	0	0	0	0	2	0	0	0	2	1	0	0	0	0	3	4	1	0	0	3	4	7	0	0	0	0	4	2	3	0	5	0
ECM1	16	0	32	28	6	34	35	46	52	0	64	16	0	0	0	74	0	19	64	19	11	45	47	43	90	64	2	0	0	10	40	12	44	14	24	86	80	24	55	3	32
FALEC	35	64	0	72	10	354	0	161	40	284	0	118	0	182	0	131	0	35	5	8	0	9	25	29	10	52	0	71	21	30	23	3	15	10	0	4	25	2	0	10	2
ADAMTSL4	799	4	0	30	0	0	16	10	0	12	0	48	0	76	164	43	188	10	87	4	44	0	9	13	116	41	64	1	389	2	300	3	40	195	39	102	39	3	48	5	282
MIR4257	0	0	0	0	0	0	0	0	0	0	0	0	0	0	0	0	0	0	0	2	0	0	0	1	0	0	0	0	0	0	1	3	0	0	2	1	0	0	0	3	0
ADAMTSL4-AS1	52	11	0	66	58	191	43	174	83	151	173	127	0	192	21	108	0	242	266	98	169	101	15	220	177	202	229	93	204	106	232	42	31	8	30	3	15	12	5	55	29
MCL1	7162	12165	1542	11762	11081	10682	8734	14738	9123	12854	5698	10620	1788	6713	4354	12466	10624	12163	12425	5811	4823	4882	3368	6173	7176	7409	9526	6934	13258	4270	12360	6999	6208	3109	2000	6588	2791	2067	8893	7658	7298
GOLPH3L	318	1196	1332	1444	1444	501	372	553	1059	261	106	1375	6	612	1186	820	1988	1463	2727	842	2697	1326	2010	623	3245	705	1055	1779	7245	835	2578	714	1383	1924	1608	1321	1757	1116	1149	835	850
HORMAD1	40	36	0	15	7	0	0	109	0	0	0	113	0	0	0	55	0	107	0	48	11	94	6	54	23	52	86	75	2	16	0	32	40	0	0	6	0	0	7	43	801
CTSK	118	99	0	289	90	62	0	491	98	210	60	0	0	327	168	407	0	439	506	289	310	279	117	398	272	239	0	180	1109	137	372	216	45	144	20	51	75	70	30	220	89
ARNT	1282	1785	574	768	1196	718	644	2545	1844	1288	803	820	1670	347	966	2149	1992	3477	3501	2456	2104	3539	1838	1723	4553	3086	972	2343	7636	1698	3445	2137	2119	2331	2073	2292	2372	1573	1715	1676	1005
SETDB1	820	2431	854	1873	844	1114	731	1976	1388	1545	748	2028	186	1474	1764	3474	752	2689	1407	2095	1142	1932	646	2260	1409	1763	475	3061	2017	1367	1580	720	977	688	1015	2607	812	837	1537	1721	758
CERS2	5277	6465	4791	5690	4741	2474	4454	4933	10355	4875	3990	5221	4830	4029	12351	6793	2430	1603	2274	1269	1806	1709	2020	1014	3377	869	1058	2482	4050	913	4962	1493	2294	4995	2002	10046	2549	2760	4575	1605	955
ANXA9	0	0	0	28	0	0	0	21	0	0	0	0	0	0	0	94	0	46	52	51	3	28	15	2	0	31	189	0	104	15	34	4	15	73	28	125	25	69	4	28	0
FAM63A	117	380	0	215	46	94	747	336	534	189	0	679	0	422	478	997	1040	223	46	226	24	220	4	170	2	373	128	101	686	216	118	55	2	199	198	321	103	2	0	242	0
BNIPL	0	13	94	60	26	24	16	9	0	0	100	0	0	0	0	49	0	57	112	21	10	54	40	152	31	115	0	30	14	4	58	5	2	39	59	108	43	15	7	30	2
C1orf56	375	526	245	292	157	303	44	491	124	330	16	418	15	49	192	354	356	833	900	130	163	1082	359	1304	552	1038	658	903	1058	332	630	658	532	468	298	83	545	263	64	175	79
CDC42SE1	4668	11544	5630	7993	2363	4677	1964	9753	6862	7457	3660	9537	2821	7320	1717	10961	4144	14828	8696	5987	2385	12057	6132	12923	6500	10377	3910	21594	18235	9305	5224	7960	7005	4802	2843	4297	4301	5574	4875	3942	1453
MLLT11	3762	292	1275	269	73	0	769	348	1274	276	638	1	180	799	9389	129	428	108	186	85	832	147	491	116	205	5	1936	14	1323	55	4655	116	764	10087	6048	2732	10398	4	36	47	140
GABPB2	717	388	182	592	254	361	140	623	448	702	235	1034	0	376	426	1009	54	2486	1036	1029	223	1805	350	1836	734	946	372	3005	2310	996	847	1202	827	433	574	344	804	706	383	1294	357
SEMA6C	90	0	8	0	50	6	0	13	14	40	112	25	0	0	0	0	8	0	20	5	4	0	10	14	14	0	8	4	0	0	109	0	28	1	11	184	6	8	117	2	1
TNFAIP8L2	338	3558	0	1397	0	855	0	1596	0	400	0	2424	0	0	0	1855	0	261	128	796	164	539	27	178	93	188	139	1184	178	433	21	235	96	33	9	4	74	23	0	544	0
TNFAIP8L2-SCNM1	0	0	0	0	0	0	0	0	0	0	0	0	0	0	0	0	0	0	0	0	0	0	0	0	0	0	0	0	0	0	0	0	0	0	0	0	0	0	0	0	0
LYSMD1	8	179	128	98	86	148	34	169	329	4	120	155	38	0	87	63	50	85	346	34	71	166	313	87	351	107	275	200	1091	97	353	79	315	340	233	377	449	253	174	23	33
SCNM1	455	269	410	291	192	228	139	386	355	242	450	389	99	262	285	273	297	232	536	327	486	231	231	305	385	295	546	150	193	782	348	245	234	252	361	274	358	259	155	193	98
TMOD4	398	63	20	88	7	0	0	95	0	0	0	69	0	123	276	57	0	28	75	16	31	34	18	98	48	36	52	30	169	16	59	39	10	34	50	149	44	24	14	24	14
VPS72	5341	4598	8293	3911	5173	2273	2726	4281	6287	2458	4377	5739	1421	2606	8151	4173	3838	1113	1805	1063	1517	1129	938	1811	2870	912	1104	1338	3463	1394	3349	2833	1807	2150	2590	3454	3069	1960	1148	843	223
PIP5K1A	1151	2024	350	2576	1748	1571	2043	1667	5508	1960	1896	1604	748	609	3486	1917	1773	2141	4307	873	1728	1747	1756	1537	3678	500	1567	1322	4408	783	4200	739	1981	1479	1375	4743	1683	1730	4518	1309	959
PSMD4	27787	18600	25611	13291	14704	11841	14854	18148	28045	12085	27086	18990	24118	8291	31825	16956	14414	2942	8383	2639	7570	2235	4954	3125	7156	2520	6218	4210	9907	3424	8584	6749	5460	7058	7304	8442	8470	7065	3328	2322	1019
LOC100507670	73	11	142	122	71	216	217	203	287	149	238	144	0	126	149	90	86	16	41	25	46	11	29	99	53	37	149	34	32	33	110	13	26	52	54	14	60	21	11	65	12
PI4KB	6428	10332	3309	4495	3218	6560	5758	9238	6895	11262	7282	8316	2972	6357	6633	11649	3742	1654	1340	1379	1066	1661	1057	1729	1795	1054	596	2646	3757	1127	1780	1434	864	1181	809	4081	1210	830	1832	1170	268
RFX5	6313	17154	7832	13436	5918	11361	5677	20113	13330	9537	6786	21713	11125	9402	13441	21866	8166	6320	3365	6748	3141	5050	3590	6806	5295	4934	1966	7901	8500	3113	4399	3769	4219	5839	3919	6483	3450	3171	5110	4918	1045
GBAT2	372	323	410	788	1044	456	373	721	608	513	604	471	347	313	637	429	208	162	287	267	309	114	301	146	217	458	707	292	200	425	322	253	222	238	518	195	312	206	102	79	64
SELENBP1	4898	0	0	0	0	0	0	0	0	0	0	0	0	0	0	0	0	0	0	2	20	2	0	0	18	0	0	2	0	0	4	0	0	0	128	109	5	0	0	0	0
PSMB4	7490	4372	11516	5977	9740	4666	5879	6350	8720	5894	6811	6643	6470	5674	7107	5124	7119	7281	15539	3223	9191	5601	13088	7129	15025	4693	17654	9817	25987	3334	17895	8065	13628	15934	25590	19204	21375	20753	8503	3285	4694
CGN	656	0	323	0	226	0	0	120	256	0	276	0	0	618	0	0	0	0	126	0	2	3	108	0	22	0	14	0	0	0	21	0	88	169	154	1106	213	159	1139	0	196
MIR554	0	0	0	0	0	0	0	0	0	0	0	0	0	0	0	0	0	0	2	4	0	0	0	0	0	3	0	0	0	0	0	0	0	1	3	0	0	0	0	1	0
CELF3	0	94	0	0	0	0	0	0	0	68	0	0	0	0	0	0	0	0	10	6	12	6	0	0	29	0	0	0	0	0	7	0	0	8	0	60	29	0	6	4	0
RIIAD1	11	0	0	0	0	3	0	0	0	0	0	0	0	0	0	0	0	0	20	0	0	0	0	0	2	0	0	0	0	0	0	0	10	0	0	0	0	0	0	0	0
MRPL9	7107	4899	9432	6067	7970	4297	6413	6436	9248	8476	5937	6602	5679	5490	8491	5558	5393	1618	1829	723	1103	1014	1036	1868	1510	845	1553	1997	2104	705	3347	1088	1879	1345	1273	3490	1453	1838	2029	542	625
OAZ3	0	17	92	0	145	0	104	0	181	64	93	7	135	1	46	42	0	19	54	17	73	1	40	7	14	0	46	76	1	8	66	9	32	129	31	24	34	79	41	3	0
TDRKH	880	1313	2458	548	1758	316	1032	150	5363	653	511	267	3915	1111	2913	830	33	448	2874	481	2123	280	2257	651	2155	111	646	312	2754	215	2739	175	533	2640	1466	909	2004	1021	776	119	343
LINGO4	0	0	0	0	20	0	17	0	0	0	0	0	0	0	0	0	0	0	8	0	31	0	0	0	278	0	0	0	0	0	206	0	0	10	0	2	0	0	0	0	14
C2CD4D	239	7	1981	1	460	0	1251	13	363	26	1591	63	1731	193	3017	34	1272	0	16	0	77	0	7	4	77	0	37	2	28	0	147	0	36	50	28	237	2	0	18	0	5
LOC100132111	377	11	637	24	298	16	432	24	534	90	673	50	0	143	826	23	358	9	215	2	249	10	42	6	452	13	88	0	251	1	277	5	88	122	26	69	51	14	63	10	129
THEM5	113	0	571	1	193	29	518	0	1142	30	272	68	168	116	350	9	549	7	241	0	160	8	378	3	392	0	271	3	345	1	198	0	126	141	45	198	65	54	173	4	133
THEM4	1448	656	6364	917	8637	698	7562	1319	6192	2074	6989	2049	5364	1027	6262	1256	5007	319	885	204	1636	324	1233	566	63	166	1359	754	2174	266	2503	242	512	972	711	1660	402	1081	1768	216	579
S100A10	12098	3996	32397	4585	3709	2620	10438	6646	85166	7602	4761	4520	21152	3875	1692	4248	4964	674	12720	1230	404	1669	266	1471	569	1581	4624	3108	9866	2968	10341	1614	4771	7438	2932	3082	212	2816	1778	936	24
NBPF18P	0	0	0	0	0	0	0	0	0	0	0	0	0	0	0	0	0	0	3	0	0	0	0	0	0	0	0	0	0	0	0	0	0	13	0	2	0	6	0	0	0
S100A11	19672	3954	69712	2878	44673	1322	36645	2676	78219	1720	11231	2414	18538	2124	29552	2619	22520	972	30989	2184	31051	2493	33331	611	170	693	440	3374	66893	3412	37520	2698	486	36650	7002	6558	116	15049	5011	1571	274
LOC100131107	0	0	0	0	0	0	0	0	0	4	0	0	0	0	0	0	0	0	0	0	0	0	0	0	0	0	0	0	0	0	0	0	0	0	0	0	0	0	0	0	0
TCHHL1	0	0	0	0	0	0	26	0	0	0	0	0	0	0	0	0	0	0	10	0	0	0	112	0	20	0	263	0	0	0	56	0	4	8	0	0	2	0	0	0	0
TCHH	0	0	0	0	76	0	0	0	0	0	0	0	0	0	0	0	0	0	8	2	0	0	0	0	34	0	4	0	0	0	0	0	2	32	0	0	0	0	0	0	0
RPTN	0	0	0	0	0	0	0	0	0	0	0	0	0	0	0	0	0	0	0	0	0	0	0	0	0	0	0	0	0	0	0	0	0	0	0	0	0	0	0	0	0
HRNR	0	0	0	0	0	0	0	0	0	0	80	0	0	0	0	0	0	0	137	8	6	2	165	4	32	2	12	206	0	4	0	0	50	19	0	0	0	45	36	0	2
FLG	0	0	0	0	0	0	0	0	1	0	0	0	0	6	0	0	0	0	169	0	0	2	79	8	130	0	0	4	0	0	0	0	56	64	0	0	0	34	47	0	0
FLG2	0	0	0	0	0	0	0	0	0	4	0	0	0	0	0	0	0	0	0	0	0	0	30	0	6	0	24	0	0	0	0	0	2	18	0	0	2	0	0	0	0
CRNN	0	0	0	0	0	0	0	0	0	0	0	0	0	0	0	0	0	0	0	0	0	0	0	0	0	0	0	0	0	0	0	0	0	2	0	0	8	0	0	0	0
LCE5A	0	0	0	0	0	0	0	0	0	0	0	0	421	0	0	0	0	0	0	0	0	0	0	0	0	0	0	0	0	0	0	0	0	0	0	0	94	4	0	0	0
CRCT1	0	0	0	0	0	0	0	0	0	0	0	0	0	0	0	0	0	0	0	0	0	0	0	0	0	0	0	0	0	0	0	0	0	0	0	0	0	0	0	0	0
LCE3E	0	0	0	0	0	0	0	0	0	0	0	0	0	0	0	0	0	0	0	0	0	0	19	0	0	0	0	0	0	0	0	0	0	0	2	5	0	0	0	0	0
LCE3D	0	0	0	0	0	0	0	0	0	0	0	0	0	0	0	0	0	0	126	0	0	0	22	0	6	0	0	0	0	0	42	0	0	0	35	3	8	4	0	0	0
LCE3C	0	0	0	0	0	0	0	0	0	0	0	0	0	0	0	0	0	0	0	0	0	0	0	0	0	0	0	0	0	0	0	0	0	0	0	0	0	0	0	0	0
LCE3B	0	0	0	0	0	0	0	0	0	0	0	0	0	0	0	0	0	0	0	0	0	0	0	0	0	0	0	0	0	0	0	0	0	0	0	0	0	0	0	0	0
LCE3A	0	0	0	0	0	0	0	0	0	0	0	0	0	0	0	0	0	0	4	0	0	0	0	0	0	0	0	0	0	0	0	0	0	0	0	0	4	0	1	0	0
LINC00302	0	0	0	0	0	0	0	0	0	0	0	0	0	0	0	0	0	0	0	0	0	0	0	0	0	0	0	0	0	0	0	0	0	0	0	0	0	0	0	0	0
LCE2D	0	0	0	0	0	0	0	0	0	0	0	0	0	0	0	0	0	0	0	0	0	0	0	0	0	0	0	0	0	0	0	0	0	0	0	0	0	0	0	0	0
LCE2C	0	0	0	0	0	0	0	0	0	0	0	0	0	0	0	0	0	0	0	0	0	0	0	0	0	0	14	0	0	0	0	0	0	0	0	0	0	0	0	0	0
LCE2B	0	0	0	0	0	0	0	0	0	0	0	0	0	0	0	0	0	0	0	0	0	0	0	0	0	0	0	0	0	0	0	0	0	0	0	0	0	0	0	0	0
LCE2A	0	0	0	0	0	0	0	0	0	0	0	0	0	0	0	0	0	0	0	0	0	0	0	0	0	0	0	0	0	0	0	0	0	0	0	0	0	0	0	0	0
LCE4A	0	0	0	0	0	0	0	0	0	0	0	0	0	0	0	0	0	0	0	0	0	0	0	0	0	0	0	1	0	0	0	0	0	0	0	0	0	0	0	0	0
C1orf68	0	0	0	0	0	0	0	0	0	0	0	0	0	0	0	0	0	0	0	0	0	0	0	0	0	0	0	0	0	0	0	0	0	0	0	0	0	0	0	0	0
KPRP	0	0	0	0	0	0	0	0	0	0	0	0	0	0	0	0	0	0	0	0	0	0	0	0	0	0	0	0	0	0	0	0	0	0	0	0	0	0	0	0	0
LCE1F	0	0	0	0	0	0	0	0	0	0	0	0	0	0	0	0	0	0	0	0	0	0	0	0	0	0	2	0	0	0	0	0	0	0	0	0	0	0	0	0	0
LCE1E	0	0	0	0	0	0	22	0	0	0	0	0	0	0	0	0	0	0	0	0	0	0	0	2	0	0	0	0	20	0	11	0	2	0	0	8	6	0	0	0	0
LCE1D	0	0	0	0	0	0	0	0	0	0	0	0	0	0	0	0	0	0	0	0	0	0	0	0	0	0	0	0	0	0	0	0	0	0	4	0	0	0	0	0	0
LCE1C	0	0	0	0	0	0	0	0	0	0	0	0	0	0	0	0	0	0	0	0	0	0	0	0	0	0	0	0	0	0	0	0	0	0	0	0	0	0	0	0	0
LCE1B	0	0	0	0	0	0	0	0	0	0	0	0	0	0	0	0	0	0	1	0	0	0	0	0	0	0	0	0	0	0	0	0	0	0	0	0	0	0	0	0	0
LCE1A	0	0	0	0	0	0	0	0	0	0	0	0	0	0	0	0	0	0	0	0	0	0	0	0	0	0	0	0	0	0	0	0	0	0	0	0	0	0	0	0	0
LCE6A	0	0	0	0	0	0	0	0	0	0	0	0	0	0	0	0	0	0	0	0	0	0	0	0	0	0	0	0	0	0	0	0	0	0	0	0	0	0	0	0	0
SMCP	0	0	0	0	76	0	0	0	0	0	0	0	0	0	0	0	0	0	11	0	0	0	2	0	8	0	68	0	71	0	0	0	2	0	0	0	0	0	0	0	0
IVL	0	0	0	0	200	0	278	0	92	0	0	0	0	0	270	0	782	0	26	0	78	0	4	0	231	0	41	0	144	0	27	0	0	0	78	177	0	0	2	0	168
SPRR4	0	0	0	0	0	0	0	0	0	0	0	0	0	70	0	0	0	0	0	0	0	0	0	0	0	0	0	0	0	0	0	0	0	0	0	0	0	0	0	0	0
SPRR1A	0	0	0	0	0	0	0	0	0	0	0	0	0	0	0	0	0	0	0	0	0	0	4	0	0	0	0	0	0	0	2	0	0	0	0	0	0	0	0	0	0
SPRR3	0	0	0	0	0	0	0	0	0	0	0	0	0	0	0	0	0	0	0	0	0	0	0	0	0	0	0	0	0	0	0	0	0	2	0	0	0	0	0	0	0
SPRR1B	0	0	0	0	12	0	0	0	46	0	0	0	0	0	0	0	0	0	4	0	0	0	2	0	0	0	0	0	0	0	2	0	0	0	0	0	0	0	0	0	0
SPRR2D	0	0	0	0	0	0	0	0	0	0	0	0	0	0	0	0	0	0	0	0	0	0	0	0	6	0	0	0	0	0	0	0	0	0	0	0	0	0	0	0	0
SPRR2A	0	0	0	0	0	0	0	0	0	0	0	0	0	0	0	0	0	0	0	0	0	0	0	0	0	0	0	0	0	0	0	0	0	0	0	0	36	0	0	0	20
SPRR2B	0	0	0	0	0	0	0	0	0	0	0	0	0	0	0	0	0	0	0	0	0	0	0	0	0	0	0	0	0	0	0	0	0	0	0	0	0	0	0	0	0
SPRR2E	0	0	0	0	0	0	0	0	0	0	0	0	0	0	0	0	0	0	0	0	0	0	0	0	0	0	0	0	0	0	0	0	0	2	0	0	0	0	0	0	0
SPRR2F	0	0	0	0	0	0	0	0	0	0	0	0	0	0	0	0	0	0	0	0	0	0	0	0	0	0	0	0	0	0	0	0	0	0	0	0	0	0	0	0	0
SPRR2C	0	0	0	0	0	0	0	0	0	0	0	0	0	0	0	0	0	0	0	0	0	0	0	0	6	0	0	0	0	0	0	0	0	0	0	0	1	0	0	0	0
SPRR2G	0	0	0	0	0	0	0	0	0	0	0	0	0	0	0	0	0	0	2	0	1	0	0	0	4	0	0	0	0	0	10	0	0	6	0	0	0	0	0	0	1
LOC101928009	0	0	0	0	0	0	0	0	0	0	0	0	0	0	0	0	0	0	0	0	0	0	0	0	0	0	0	0	0	0	4	2	0	2	0	0	16	0	0	0	0
LELP1	0	0	0	0	0	0	0	0	0	0	0	0	0	0	0	0	0	0	0	0	0	0	0	0	0	0	0	0	0	0	0	0	0	0	0	0	0	0	0	0	0
PRR9	0	0	0	0	0	0	0	0	0	0	0	0	0	0	0	0	0	0	0	0	0	0	0	0	3	0	0	0	0	0	0	0	0	1	0	0	0	0	0	0	0
LOR	872	0	0	0	1329	28	1067	0	0	34	3177	0	523	836	8880	54	1187	0	0	0	0	0	30	0	37	0	225	0	502	0	220	0	5	161	2	33	70	0	0	0	48
PGLYRP3	0	0	0	0	8	0	2	0	0	0	0	0	0	0	119	0	0	0	31	0	34	0	0	0	121	2	49	0	167	0	179	0	0	46	0	4	2	0	0	2	64
PGLYRP4	25	0	0	0	393	0	172	0	0	0	0	0	0	0	352	0	0	0	442	0	247	0	33	0	620	0	314	3	660	1	948	0	0	211	108	62	43	2	0	1	519
S100A9	172	94	0	396	0	828	230	378	40	426	0	0	576	124	0	338	212	8	0	0	4	0	16	14	24	0	0	0	48	0	8	0	42	0	0	0	0	0	0	2	44
S100A12	0	0	0	70	0	0	26	0	0	0	0	0	0	0	0	8	0	0	0	0	0	0	0	0	0	0	0	0	0	0	0	0	0	0	0	0	0	0	0	0	0
S100A8	118	0	62	373	46	268	302	314	0	394	38	4	0	66	0	156	122	50	0	0	0	2	36	36	0	24	76	0	148	0	8	6	148	0	0	0	6	0	0	14	10
S100A7A	0	0	0	0	0	0	0	0	0	0	0	0	0	0	0	0	0	0	0	0	0	0	0	0	0	0	0	0	0	0	0	0	0	0	0	0	0	0	0	0	0
S100A7L2	0	0	0	0	0	0	0	0	0	0	0	0	0	0	0	0	0	0	0	0	0	0	0	0	0	0	0	0	0	0	0	0	0	0	0	0	0	0	0	0	0
[truncated: 25,236 more rows]

## Sheet: cHL_signatures
Table 3 cHL signature defining genes
[truncated: 196 more rows]

[truncated: 2 more sheets: Viral_transcripts, HRS vs B DEGs and PMBL ]
